# Supplementary material for: Stable and dynamic nucleosome states during a meiotic developmental process
Source: HighWire-hosted journal article supplement (doi:10.1101/gr.117465.110), 2011-04-22
Supplement: Table_S2.xlsx [file Table_S2.xlsx]

## Sheet: Summary
Additional data file 1
Measured nucleosomes: The coordinates and properties of the six input nucleosomes datasets and 61,110 measured reference nucleosomes.
Hypothetical nucleosomes: The coordinates and properties of 5,043 hypothetical nucleosomes.
Arrays: The coordinates of 6,586 Arrays, 2,430 NDRs, and 1,248 Singlets.
Genes: A list of the 7,496 TSS (from mRNAs, CUTs, SUTs, and other noncoding RNAs used in this study).
Linkers and NFRs: Classification of 60,708 linkers and NFRs, and a list of overlapping genes.

## Sheet: Measured nucleosomes
Table S2: Zhang et al. 2010 Nucleosome coordinates in rich media and throughout the sporulation program
# column descriptions:
# 1. name: N{chromosome:dyad coordinate} for measured nucleosomes, P{chromosome:dyad coordinate} for hypothetical/potential nucleosomes
# 2. chrom: chromosome
# 3. start: nucleosome start coordinate
# 4. end: nucleosome end coordinate
# 5. position relative to the TSS. '0' nucleosomes are in 5' NFR, Terminal nucleosomes are indicated with an *. Nucleosomes that are not within numbering range of a gene are left blank
# 6. peakheight: nucleosome peakheight; -1 is artifical for potential nucleosomes (only internal purpose)
# 7. nc: the number of nucleosomes from the six datasets that contibute to the reference nucleosome
# 8. occ: average occupancy level of datasets 1-4 (missing data excluded, since coverage of most sets is not saturating); -4 is artifical for potential nucleosomes (only internal purpose); -2, -1 are also artificial for nucleosomes only contributed by tiling array dataset 5 and/or 6 (only internal purpose)
# 9. fuzziness: standard deviation of nucleosome positions from datasets 1-6 ; -1 is artifical for potential nucleosomes (only internal purpose)
# 10-99. In sets of three, color coded: nucleosomes/modified nucleosomes midpoint coordinate, number of Nucleosome Tag present within exclusion zone, standard deviation of tag coordinates
									H3																		H3K9ac																		H3K4me3
			Reference (Jiang and Pugh, 2009)							YPD			0			2			5			7			24			YPD			0			2			5			7			24			YPD			0
1	2	3	4	5	6	7	8	9	10	11	12	13	14	15	16	17	18	19	20	21	22	23	24	25	26	27	28	29	30	31	32	33	34	35	36	37	38	39	40	41	42	43	44	45	46	47	48	49	50
Name	chrom	start	end	position	peakheight	nc	occ	fuzziness	Midpoint	Tag	Fuzziness	Midpoint	Nucleosome Tag	Fuzziness	Midpoint	Nucleosome Tag	Fuzziness	Midpoint	Nucleosome Tag	Fuzziness	Midpoint	Nucleosome Tag	Fuzziness	Midpoint	Nucleosome Tag	Fuzziness	Midpoint	Tag	Fuzziness	Midpoint	Nucleosome Tag	Fuzziness	Midpoint	Nucleosome Tag	Fuzziness	Midpoint	Nucleosome Tag	Fuzziness	Midpoint	Nucleosome Tag	Fuzziness	Midpoint	Nucleosome Tag	Fuzziness	Midpoint	Tag	Fuzziness	Midpoint	Nucleosome Tag
N1:192	chr01	119	265		1.10863	3	80.5	41	161	49	36	159	34	51	160	24	22	158	20	40							163	1	0
N1:382	chr01	309	455		3.60572	5	71	21.916	369	299	22	368	169	24	367	68	26	369	48	18	429	68	38	369	71	22	370	18	4	376	3	3	367	8	6	372	2	0	369	8	19	372	45	8	376	3	13	368	16
N1:630	chr01	557	703		4.30964	5	62	10.756	686	13	32	633	13	42	622	2	3	690	7	35	685	9	22	640	3	22							640	2	3													638	1
N1:872	chr01	799	945		3.812	5	65	15.643	889	122	28	890	50	36	892	16	39	926	11	15	938	19	32				926	13	23	921	3	18	923	1	0	799	2	1	809	1	0	926	29	25	923	1	0	819	2
N1:1033	chr01	960	1106		3.43535	4	52.5	11.325	1055	225	14	1059	66	22	1049	34	17							1050	34	18				1079	3	32							1057	1	0				1074	1	0
N1:1191	chr01	1118	1264		2.98963	3	100	1.732							1262	28	10	1151	32	13	1151	59	15										1169	3	0	1263	2	0	1262	2	5	1156	13	32				1161	2
N1:1340	chr01	1267	1413		2.04703	3	50	24.007	1389	198	13	1386	80	13				1381	29	10	1388	43	11	1385	47	14																1387	9	21	1379	1	0	1389	4
N1:1585	chr01	1512	1658	+5*:YAL068C;	3.82622	4	50	5.916																																		1605	1	0
N1:1902	chr01	1829	1975	+3:YAL068C;	2.67321	4	50	35.968	1830	13	6													1833	3	10	1829	1	0													1848	21	30
N1:2081	chr01	2008	2154	+2:YAL068C;	2.86087	4	50	37.206	2059	14	8	2153	18	31	2059	4	5	2057	3	5	2059	7	6	2059	6	5																2078	18	13	2064	1	0
N1:2241	chr01	2168	2314	+1:YAL068C; -1:YAL067W-A;	2.76234	3	100	8.544										2252	47	19				2252	47	14	2252	24	14
N1:2396	chr01	2323	2469	-1:YAL068C; +1:YAL067W-A;	3.73937	4	63.5	7.32	2372	433	17	2356	151	16	2362	80	16				2373	53	17							2347	6	20	2348	7	7	2335	5	29	2355	4	18	2410	23	30	2372	4	12	2342	5
N1:2671	chr01	2598	2744	+3:YAL067W-A;	4.92225	5	98.33	3.362	2665	291	25	2715	78	27	2670	56	27	2720	49	35	2667	43	29	2668	72	24	2662	20	30	2732	1	0	2735	2	0	2717	13	20	2665	7	27	2670	11	23	2662	5	24	2723	2
N1:2835	chr01	2762	2908	+4*:YAL067W-A;	5.0448	6	87.5	12.453	2828	283	29	2872	83	36	2834	42	29	2875	35	34	2870	43	39	2836	28	27	2828	17	29	2889	4	8				2877	12	32				2841	8	27	2833	4	23
N1:3028	chr01	2955	3101		4.35915	6	87.25	18.984	3013	497	32	3023	113	30	3018	79	28	3034	51	23	3038	54	31	3018	71	23	3016	25	37	3090	5	21	3011	3	34	3044	11	22	3016	9	17	3031	8	18	3044	3	22	2999	1
N1:3213	chr01	3140	3286		4.59146	6	83.75	30.012	3200	576	29	3203	162	25	3205	102	26	3208	85	23	3203	77	31	3205	111	18				3241	4	21	3208	5	5	3229	20	19	3242	12	30	3204	4	26	3207	4	28	3206	7
N1:3370	chr01	3297	3443		3.77333	4	100	6.702							3373	51	41	3430	66	38	3439	65	41	3380	66	37	3310	39	39	3392	12	25	3437	9	33	3427	25	31	3441	18	21	3372	17	31				3387	5
N1:3609	chr01	3536	3682		2.05119	5	82	42.47				3671	131	37	3672	70	41	3677	63	39	3611	72	45	3670	69	34				3649	5	23	3632	2	29				3613	1	0	3592	7	25				3567	13
N1:3792	chr01	3719	3865		4.34773	6	89.25	28.069	3833	379	35	3833	123	29	3837	57	30	3836	61	33							3799	59	34	3804	6	15	3781	5	22	3767	11	44	3788	10	23	3772	9	35	3850	3	28	3834	9
N1:4082	chr01	4009	4155		3.01206	5	100	38.493	4124	540	27	4125	173	24	4124	114	31	4126	116	23	4125	109	19	4126	114	27	4126	102	16	4120	11	23	4120	6	29	4122	10	7	4116	9	29	4058	11	38	4049	10	38	4127	11
N1:4306	chr01	4233	4379		3.96293	6	100	24.147	4347	426	39	4349	120	34	4272	80	32	4356	50	44	4324	74	43	4342	42	37	4295	84	41	4376	1	0	4268	1	0	4307	9	39	4319	9	42	4253	20	30	4301	4	28	4317	6
N1:4528	chr01	4455	4601		1.97804	3	100	39.051	4588	322	38	4583	85	34	4590	55	38	4586	79	36	4588	57	41	4578	39	28	4540	45	41	4598	2	10	4593	2	19							4586	6	33	4570	3	22	4464	1
N1:4682	chr01	4609	4755		2.67	4	80.5	17.914																												4653	7	41	4637	7	24							4707	5
N1:4978	chr01	4905	5051		5.56394	6	86.5	7.367	4977	377	30	4970	119	28							4973	63	27				4980	38	30							5050	2	19	4974	4	27	4969	10	37
N1:5181	chr01	5108	5254	+7*:SUT432;	4.90946	6	100	12.329	5165	452	27	5152	98	27	5186	65	30	5170	65	26	5173	65	30	5189	66	28	5176	58	31	5175	2	21	5223	2	20				5166	6	3	5154	5	18	5144	7	19	5166	2
N1:5332	chr01	5259	5405	+6:SUT432;	3.97589	4	100	2.082	5334	403	25				5336	75	25	5332	51	26	5336	63	26				5344	26	29										5352	3	22	5347	8	25	5334	12	17
N1:5484	chr01	5411	5557	+5:SUT432;	1.79194	3	12	25.865				5454	124	29	5516	87	33	5509	100	34				5484	74	37	5512	68	38	5436	4	8	5434	7	28	5446	7	2										5484	10
N1:5656	chr01	5583	5729	+4:SUT432;	3.27936	4	58.33	13.226	5650	185	36	5618	59	37							5636	40	23	5654	37	30				5625	3	34	5630	1	0	5645	1	0	5634	7	12	5646	14	44	5652	11	11	5672	13
N1:5806	chr01	5733	5879	+3:SUT432;	4.4088	5	85.67	9.731	5819	639	25	5821	133	28	5821	88	29	5819	76	31	5818	92	29	5823	83	27	5819	74	28	5839	6	29	5814	6	14	5812	5	20	5827	5	25	5817	8	31	5818	43	23	5822	57
N1:5966	chr01	5893	6039	+2:SUT432;	2.23588	3	50.5	17.214																																		5967	6	45	5967	17	32
N1:6134	chr01	6061	6207	+1:SUT432;	4.67019	6	84.5	13.837	6127	310	29	6117	70	32	6127	48	25	6123	40	27	6118	47	24	6122	47	24	6119	73	23				6136	6	10	6129	6	29	6122	4	8	6124	15	24	6125	56	18	6124	128
N1:6303	chr01	6230	6376	0:SUT432;	3.15985	4	80.5	16.673	6293	260	26	6311	102	26	6292	33	22	6286	36	26				6287	26	20	6303	35	24	6279	7	22				6282	4	29				6295	18	25	6315	24	21	6305	105
N1:6602	chr01	6529	6675		3.29536	4	98.5	12.42	6621	198	24	6619	67	20	6618	26	16	6618	31	15	6616	40	24	6610	24	22	6614	29	26	6620	33	17	6618	9	5	6616	8	9	6616	5	10	6616	10	27	6618	1	0	6618	34
N1:6804	chr01	6731	6877		1.24538	3	45	35.005							6774	18	41	6829	22	32	6834	20	24	6763	21	38	6829	24	35	6796	14	35	6825	3	15	6858	6	30	6807	7	34	6831	15	32	6805	5	26	6824	15
N1:6953	chr01	6880	7026		2.47667	4	80.5	30.226	6950	263	34	6931	61	32										6949	21	27	7013	48	34										7008	4	5	7015	12	31	6983	4	45	7013	29
N1:7163	chr01	7090	7236	+13*:YAL067C;	1.97762	2	-1	3.536	7151	175	26	7147	35	32				7157	26	32	7149	23	21	7152	14	29							7149	5	30										7161	2	11
N1:7314	chr01	7241	7387	+12:YAL067C;	4.73746	6	97.25	32.078	7317	511	32	7312	136	28	7328	73	34	7330	91	33	7315	92	35	7326	75	33	7322	79	30	7328	11	27	7344	11	36	7316	9	27	7319	9	22	7334	39	29	7330	3	15	7319	39
N1:7608	chr01	7535	7681	+10:YAL067C;	3.61643	6	100	22.695	7635	641	34	7654	161	42	7659	89	40	7596	51	39	7647	94	37	7644	86	36	7590	113	39	7595	10	26	7616	15	33				7593	4	18	7585	65	39	7594	7	24	7590	43
N1:7787	chr01	7714	7860	+9:YAL067C;	4.77526	5	96.33	5.771	7799	483	36							7800	53	31	7803	49	30	7796	70	38	7799	52	28	7803	11	19	7801	6	27	7738	11	30	7749	5	36	7798	16	37	7782	8	30	7795	28
N1:7936	chr01	7863	8009	+8:YAL067C;	1.93026	2	61	6.364				8006	140	36				7996	66	35	8007	81	33							7981	8	18				8003	10	19	7928	3	29				7971	5	30	8004	24
N1:8119	chr01	8046	8192	+7:YAL067C;	3.60327	6	100	26.169				8189	112	32	8180	68	38	8173	46	40	8188	75	33	8188	66	37	8116	106	40				8190	11	35				8121	8	30	8121	42	35	8156	14	32
N1:8304	chr01	8231	8377	+6:YAL067C;	4.02962	6	100	24.768	8299	469	35	8347	162	35				8370	44	34	8372	77	34	8369	70	31	8299	164	32	8328	15	39	8372	6	26	8283	4	14	8313	9	29	8303	53	39	8346	26	32	8326	65
N1:8466	chr01	8393	8539	+5:YAL067C;	2.62124	5	72.33	31.832	8531	327	39	8523	129	28	8527	71	33	8532	54	30	8530	78	35	8531	56	30	8469	89	35	8534	14	37	8522	10	29							8520	31	36	8531	23	40	8532	49
N1:8698	chr01	8625	8771	+4:YAL067C;	2.32815	5	100	37.265	8706	281	35	8706	89	31	8707	40	27	8710	37	35				8705	33	36							8704	4	20							8724	24	34
N1:8973	chr01	8900	9046	+2:YAL067C;	1.98287	4	99	36.068	8947	355	32	8921	67	33	8968	39	37	8935	32	35				8907	41	38							8910	4	25				8953	9	28
N1:9151	chr01	9078	9224	0:YAL067C; -1:SUT001;	3.08418	5	76	31.571	9154	242	32	9161	67	34	9152	36	29	9153	40	34	9156	22	24	9156	36	33	9152	88	32	9113	40	35	9152	12	31	9158	12	17	9157	10	27				9152	21	10	9152	109
N1:9434	chr01	9361	9507	+1:SUT001;	3.04972	6	100	25.121	9416	490	32	9411	172	34	9462	107	36	9465	102	37	9405	69	38	9448	79	33	9418	376	33	9402	72	31	9429	61	28	9412	34	29	9422	34	31	9425	250	35	9403	70	30	9396	282
N1:9596	chr01	9523	9669	+2*:SUT001;	3.83021	5	85.33	15.515	9592	366	26	9587	138	31							9596	71	29				9587	131	33	9579	33	36	9587	14	35	9578	11	31	9636	16	30	9600	70	35	9586	19	22	9591	103
N1:9761	chr01	9688	9834		4.64676	6	97.25	17.792	9766	513	31	9756	139	31	9771	77	35	9770	64	24	9770	57	28	9775	58	29	9770	171	31	9756	54	30	9774	22	27	9765	13	26				9769	66	34	9766	12	25	9764	118
N1:9941	chr01	9868	10014		4.49558	5	62	9.23	9929	204	35	9908	86	35	9924	37	34	9926	37	35	9925	33	34				9935	58	29	9925	47	31				9932	6	20	9933	7	23				9933	5	31	9919	55
N1:10118	chr01	10045	10191		3.20387	5	69.67	23.392	10152	315	34				10125	31	40	10146	39	45				10050	22	29							10049	5	19				10085	5	2				10124	3	32	10186	41
N1:10282	chr01	10209	10355		1.81362	2	100	10.607	10309	282	32				10299	25	36	10313	43	32																10235	11	24	10254	8	45				10327	7	17
N1:10460	chr01	10387	10533		4.64061	6	100	13.982	10484	308	37										10433	44	35							10404	22	37	10392	8	46							10413	14	26	10523	8	40	10387	10
N1:10765	chr01	10692	10838	0:Unit005; +3*:CUT436;	4.92792	6	100	12.506	10788	587	29				10767	71	31	10769	71	31	10763	66	26	10759	66	30	10781	84	29	10717	7	15	10757	5	26				10773	14	30	10767	46	23	10752	4	27
N1:10948	chr01	10875	11021	+1*:Unit005; +2:CUT436;	4.51134	5	100	8.701	10948	431	28	10902	128	35	10917	64	29	10934	55	30	10947	65	29	10928	40	32	10940	95	30	10924	24	28	10927	8	25	10897	9	23				10920	55	29	10949	4	24	10893	27
N1:11133	chr01	11060	11206	+1:CUT436;	1.96822	3	30.5	29.939				11070	95	24	11083	24	22	11083	33	30				11082	37	29	11100	46	32	11081	12	10	11093	8	36	11084	7	32				11105	23	24
N1:11364	chr01	11291	11437	+5*:YAL065C; -1:CUT436;	1.74245	3	46.5	33.561	11311	218	36	11294	45	36	11360	47	32	11357	43	29				11303	32	33	11320	62	40	11374	9	29	11374	6	38	11386	3	31	11385	5	33	11298	14	32	11371	3	13	11360	29
N1:11535	chr01	11462	11608	+4:YAL065C;	4.82516	5	61	5.099																11500	43	32							11540	1	0	11541	8	37	11548	9	31	11543	8	25	11524	5	35	11537	13
N1:11696	chr01	11623	11769	-1:YAL064W-B; +3:YAL065C;	5.26401	6	89.5	9.968	11638	245	34	11624	93	34	11679	54	33	11638	42	29	11698	41	31	11690	48	27	11647	70	39	11658	14	31	11708	10	12	11694	4	33				11693	47	25	11692	9	33	11689	16
N1:11862	chr01	11789	11935	0:YAL064W-B; +2:YAL065C;	1.10492	3	100	41.509	11926	24	10	11794	3	34	11928	4	9	11927	8	8							11925	13	4				11921	2	14										11926	5	6
N1:12071	chr01	11998	12144	+1:YAL064W-B; 0:YAL065C;	3.34091	4	50	12.473				12059	11	4							12053	5	18	12055	6	8				12023	1	0				12038	1	0				12050	100	42				12062	3
N1:12456	chr01	12383	12529	+3:YAL064W-B;	1.86919	4	81	34.769	12522	42	35				12453	5	27	12522	10	41	12519	24	40	12517	13	33	12524	7	25	12463	7	23	12526	4	21				12526	5	49	12461	100	36	12520	4	41
N1:12768	chr01	12695	12841		2.76429	4	100	30.8										12737	34	13				12737	39	14													12731	12	11	12778	146	44
N1:12923	chr01	12850	12996		2.37432	3	100	14.844										12970	5	5	12850	57	14	12965	8	8				12855	13	10				12852	17	10	12955	5	11	12927	32	32
N1:13258	chr01	13185	13331	+4*:YAL064C-A;	2.93216	5	74.33	25.917	13245	61	3	13244	21	2	13245	19	3							13244	26	2																13247	2	0
N1:13458	chr01	13385	13531	+3:YAL064C-A;	3.39491	6	98	41.998
N1:13621	chr01	13548	13694	+2:YAL064C-A;	1.7104	4	84.5	41.468	13586	100	10				13588	19	11	13587	9	9	13584	24	11	13592	13	10	13588	35	10	13586	3	10				13584	6	5				13597	10	6	13580	2	8	13576	2
N1:13835	chr01	13762	13908	+1:YAL064C-A;	2.54601	3	0	12.22	13845	1	0
N1:14098	chr01	14025	14171	-1:YAL064C-A;	2.85931	5	66.67	36.912
N1:14323	chr01	14250	14396		4.2039	5	82.67	11.546
N1:14501	chr01	14428	14574		2.48204	5	88	29.643																												14546	1	0
N1:14821	chr01	14748	14894		2.61969	4	58.5	19.883
N1:15002	chr01	14929	15075		2.64761	5	33.67	25.638
N1:15198	chr01	15125	15271		2.69582	4	100	19.841
N1:15368	chr01	15295	15441		3.23995	4	100	14.376
N1:15535	chr01	15462	15608		3.04372	4	70.5	16.153
N1:15724	chr01	15651	15797		2.02605	4	50	48.941
N1:15962	chr01	15889	16035		3.07704	5	57	22.399
N1:16240	chr01	16167	16313		2.75449	5	99	23.328																			16303	1	0
N1:16432	chr01	16359	16505		2.37142	4	43	20.998																16466	1	0
N1:16642	chr01	16569	16715		3.97679	5	100	13.126	16579	1	0	16651	1	0																									16648	1	0
N1:16799	chr01	16726	16872		2.85121	3	67	6.658				16816	2	1
N1:16992	chr01	16919	17065		1.8149	3	3	36.856										16959	1	0
N1:17145	chr01	17072	17218		3.33917	4	8.5	12.659
N1:17320	chr01	17247	17393		3.64371	5	100	16.817
N1:17470	chr01	17397	17543		1.08833	3	64	28.844
N1:17645	chr01	17572	17718		2.75408	5	75.33	32.879
N1:17871	chr01	17798	17944		2.77339	4	83	26.437							17818	1	0
N1:18039	chr01	17966	18112		1.77125	3	23	24.637
N1:18221	chr01	18148	18294		4.83687	5	85.67	4.95	18228	1	0	18222	1	0													18229	1	0
N1:18392	chr01	18319	18465		5.14264	6	73.25	13.357
N1:18574	chr01	18501	18647		3.39907	4	71	11.413
N1:18877	chr01	18804	18950		3.18257	4	50	15.064				18927	1	0
N1:19055	chr01	18982	19128		3.24003	5	51.67	22.777																									19068	1	0
N1:19247	chr01	19174	19320		3.00178	4	65.5	24.554				19190	1	0
N1:19423	chr01	19350	19496		2.40437	3	24	14.422
N1:19589	chr01	19516	19662		2.94856	5	46.67	33.878
N1:19743	chr01	19670	19816		1.85812	2	-1	9.192																																								19752	1
N1:19932	chr01	19859	20005		2.36928	4	88.5	33.995
N1:20147	chr01	20074	20220		2.82826	4	50	22.187
N1:20302	chr01	20229	20375		3.34269	5	55.67	27.273
N1:20630	chr01	20557	20703		3.67639	4	87	8.287
N1:20798	chr01	20725	20871		3.88764	4	57	4.717
N1:20969	chr01	20896	21042		1.94531	2	53	5.657
N1:21230	chr01	21157	21303	-1:YAL064W;	1.92633	4	62.5	51.183
N1:21400	chr01	21327	21473	0:YAL064W;	5.62479	6	100	6.743				21471	1	0
N1:21549	chr01	21476	21622	+1:YAL064W;	2.69896	3	100	9.713
N1:21747	chr01	21674	21820	+2:YAL064W;	4.31175	5	97	11.437
N1:21894	chr01	21821	21967	+3:YAL064W;	4.22892	5	46.67	11.61				21904	1	0
N1:22049	chr01	21976	22122	+4*:YAL064W;	1.76427	3	0	41.581
N1:22213	chr01	22140	22286	+4*:YAL063C-A;	2.06246	4	67	47.868				22217	1	0																																		22225	1
N1:22401	chr01	22328	22474	+3:YAL063C-A;	1.00436	2	69	39.598				22367	1	0				22459	1	0				22449	1	0	22446	2	21
N1:22568	chr01	22495	22641	+2:YAL063C-A;	3.10048	4	83.5	17.671
N1:22738	chr01	22665	22811	+1:YAL063C-A;	3.98192	6	80	30.265
N1:22909	chr01	22836	22982	-1:YAL063C-A;	1.94531	2	-1	5.657
N1:23077	chr01	23004	23150		1.88846	4	50	37.568				23133	1	0
N1:23235	chr01	23162	23308		3.85885	6	82.25	21.732	23224	1	0													23185	1	0
N1:23426	chr01	23353	23499		2.49316	4	34	24.933
N1:23584	chr01	23511	23657		2.95749	4	77	21.884																																								23653	1
N1:23790	chr01	23717	23863	+27*:YAL063C;	2.57425	3	32	11.846							23778	2	1							23779	3	5	23780	5	7
N1:24008	chr01	23935	24081	+26:YAL063C;	2.55869	4	50	22.247
N1:24293	chr01	24220	24366	+24:YAL063C;	2.02028	4	50	34.951	24360	3	2	24358	2	0							24359	2	2	24358	1	0	24358	3	2				24357	2	0							24355	40	15				24358	1
N1:24516	chr01	24443	24589	+23:YAL063C;	2.1814	4	50	22.583	24551	27	19	24551	6	2	24553	6	1	24551	2	1	24551	1	0	24550	4	4	24554	5	1				24554	2	1	24539	1	0							24531	1	0	24555	1
N1:24686	chr01	24613	24759	+22:YAL063C;	1.85812	2	100	9.192																																		24688	84	30
N1:24880	chr01	24807	24953	+21:YAL063C;	3.86552	5	46.33	20.224																24934	10	20				24903	5	19	24929	2	19	24943	1	0	24873	1	0	24869	99	30	24932	3	32	24906	5
N1:25091	chr01	25018	25164	+20:YAL063C;	3.03217	4	70	19.721	25104	27	27	25090	17	28	25054	11	41	25086	7	25	25094	9	28	25094	10	23	25098	12	20	25118	6	29	25142	2	30	25127	5	17	25132	3	9	25065	48	33
N1:25407	chr01	25334	25480	+18:YAL063C;	3.88795	5	77.33	19.715	25446	221	24	25444	59	23	25445	30	13	25447	18	23	25445	67	23	25445	71	20	25446	59	21	25445	4	22				25402	1	0				25438	40	23	25461	2	17	25446	4
N1:25579	chr01	25506	25652	+17:YAL063C;	1.65813	3	100	33.171																												25560	3	29	25561	3	0
N1:25839	chr01	25766	25912	+15:YAL063C;	1.62277	4	50	45.346							25784	1	0
N1:26101	chr01	26028	26174	+13:YAL063C;	1.28343	2	100	22.627
N1:26380	chr01	26307	26453	+11:YAL063C;	1.81891	3	100	32.909
N1:26590	chr01	26517	26663	+10:YAL063C;	1.0001	2	-1	51.619
N1:26787	chr01	26714	26860	+9:YAL063C;	1.09093	3	100	43.547
N1:26994	chr01	26921	27067	+8:YAL063C;	1.05661	3	100	53.379
N1:27277	chr01	27204	27350	+6:YAL063C;	3.97384	6	100	18.652	27253	975	41	27255	204	38	27252	184	44	27250	174	44	27256	201	38	27322	185	46	27247	170	40	27313	27	34				27339	27	23	27347	21	30	27321	160	39
N1:27437	chr01	27364	27510	+5:YAL063C;	2.08841	5	73.67	37.487	27436	227	28	27440	73	28	27433	67	31																27387	14	31										27380	52	28
N1:27650	chr01	27577	27723	+4:YAL063C;	2.96061	5	83.33	43.224	27714	499	42	27717	180	38	27713	84	45	27715	66	33	27716	98	39	27717	73	34	27714	130	41	27712	14	35	27712	5	34	27711	8	40				27704	16	34	27716	31	37	27712	45
N1:27919	chr01	27846	27992	+2:YAL063C;	3.02996	6	100	32.048	27912	345	31	27918	210	29	27913	84	24	27912	70	35	27916	98	28	27912	100	31	27921	315	27	27917	33	34	27923	13	35	27916	5	27	27927	6	44	27867	49	33	27919	132	32	27918	152
N1:28168	chr01	28095	28241	+10*:SUT433; 0:YAL063C;	3.00628	4	83.5	17.933	28136	29	41				28178	9	31							28186	37	25				28213	15	32				28160	3	22	28133	1	0	28179	6	20	28153	7	31	28163	24
N1:28324	chr01	28251	28397	+9:SUT433; -1:YAL063C;	4.92909	6	86.5	12.172	28308	33	30	28385	43	32	28329	31	40	28337	51	37	28331	38	38	28336	58	38	28299	15	31				28273	8	41	28335	3	18	28324	6	34	28336	19	37	28327	6	26
N1:28490	chr01	28417	28563	+8:SUT433;	4.65679	6	99.25	15.029	28499	20	31				28499	18	20	28504	37	21	28506	16	26	28499	40	22	28509	13	20				28503	8	17	28557	1	0	28485	7	29	28502	20	23	28493	3	13	28508	35
N1:28676	chr01	28603	28749	+7:SUT433;	1.02002	2	30.5	33.941				28732	3	23																			28740	1	0
N1:28942	chr01	28869	29015	+5:SUT433;	4.47044	6	98	15.556	28919	20	28	28915	32	37	28903	15	29	28936	19	42	28926	33	38	28919	34	33	28937	23	38	28942	9	27	28934	2	0	28989	3	5	28908	6	26	28912	15	37				28898	2
N1:29156	chr01	29083	29229	+4:SUT433;	2.34923	6	86	46.9	29106	29	20	29097	38	28	29108	16	29	29111	16	27	29105	24	24	29094	32	25	29112	22	31	29099	15	19	29110	5	28				29104	3	12	29100	5	9				29203	3
N1:29358	chr01	29285	29431	+3:SUT433;	5.25426	6	89.5	9.975	29358	6	19	29353	28	22				29360	18	28	29359	22	26	29331	21	24	29358	14	30	29322	11	39	29375	2	30	29315	1	0	29364	2	2	29370	2	0				29355	6
N1:29528	chr01	29455	29601	+2:SUT433;	3.66122	5	64.67	16.196	29539	49	29	29577	38	33				29538	8	21	29533	13	14	29541	21	18	29539	80	21	29531	12	21	29545	3	18	29515	1	0							29520	3	6	29539	12
N1:29713	chr01	29640	29786	+1:SUT433;	5.28533	6	85.25	9.675	29733	55	33	29734	42	25	29681	14	37	29720	18	18	29722	22	32	29716	22	28	29757	75	25	29745	14	40	29715	1	0				29703	2	4	29727	11	35	29676	7	36	29729	17
N1:29936	chr01	29863	30009	-1:CUT001; -1:SUT433;	2.14501	3	50	19.732	29970	2	5	29962	4	40				29898	1	0	29923	2	25	29898	3	3	29967	3	15	29964	4	16	29975	1	0	29951	1	0
N1:30195	chr01	30122	30268	+1:CUT001;	3.37646	5	89	19.545	30130	101	36							30122	37	30	30127	24	17	30126	31	25	30185	123	34	30181	17	19	30192	7	22	30163	3	36				30181	15	33	30181	12	26	30131	37
N1:30389	chr01	30316	30462	+2:CUT001;	4.02521	6	89	33.112	30332	93	44	30456	116	39				30456	40	42	30457	51	38	30461	50	36				30457	35	19				30447	7	30	30452	2	3	30459	55	30				30460	52
N1:30558	chr01	30485	30631	+3:CUT001; +3*:CUT437;	3.80944	4	67	6.218	30512	215	41																30509	135	38							30623	6	36							30513	15	26
N1:30714	chr01	30641	30787	+4:CUT001; +2:CUT437;	4.78915	6	88.25	14.247	30747	154	25	30755	64	18				30752	39	12	30746	59	23	30760	37	20	30747	116	29	30756	18	26	30757	8	12				30752	20	13	30761	13	15	30754	8	22	30755	35
N1:30893	chr01	30820	30966	+5*:CUT001; -1:YAL062W; +1:CUT437;	2.97762	3	34	2.517	30916	69	32	30931	22	40	30919	9	38				30917	12	31	30927	4	26	30921	37	30	30919	13	38				30946	1	0										30917	15
N1:31043	chr01	30970	31116	0:YAL062W; -1:CUT437;	1.95718	2	9	4.95																									31048	4	26							30986	8	53
N1:31202	chr01	31129	31275	+1:YAL062W;	3.75027	4	80.5	7.136	31173	53	25	31202	26	31				31151	4	32	31214	13	32	31214	2	20	31185	26	33	31144	61	28				31179	1	0	31148	3	33	31170	4	10	31139	1	0	31140	4
N1:31380	chr01	31307	31453	+2:YAL062W;	2.36214	3	32	15.133							31307	4	26	31329	17	42	31423	17	25	31437	5	18				31389	65	27				31384	14	20	31337	4	26	31388	12	23	31329	5	29
N1:31589	chr01	31516	31662	+7*:SUT434; +3*:YAL062W;	2.13558	4	70	34.394	31643	215	36	31619	70	33	31586	15	29	31599	24	22	31602	43	33	31595	19	25	31628	159	34	31589	41	26	31647	17	40	31637	14	39	31593	13	16	31593	49	35	31656	9	29	31610	75
N1:31784	chr01	31711	31857	+6:SUT434;	2.92403	4	100	18.209	31808	215	34				31751	27	34	31814	20	36				31817	31	45	31808	218	36	31807	46	41	31802	32	33				31808	27	26	31804	56	37	31812	46	36
N1:31954	chr01	31881	32027	+5:SUT434;	2.83326	5	91.75	25.714	31958	269	28	31951	78	32	31914	39	34	31971	31	39	31951	66	34	31972	37	33				31966	43	37				31958	37	26				31976	56	30	31969	64	30	31954	183
N1:32117	chr01	32044	32190	+4:SUT434;	2.77171	5	100	28.004	32118	301	38	32113	88	36	32101	40	37	32176	34	35	32109	52	32	32173	66	35	32105	269	42				32108	48	39	32117	41	34	32119	48	32				32180	85	34	32109	160
N1:32336	chr01	32263	32409	+3:SUT434;	2.89031	3	100	5.686	32275	401	37	32283	142	35				32343	34	44	32278	95	31	32352	62	45	32274	288	36	32273	37	24	32267	24	32	32286	25	35	32299	20	37	32271	43	33	32339	90	39	32273	135
N1:32512	chr01	32439	32585	+2:SUT434;	3.75706	5	77.67	24.692	32510	345	36	32519	110	41				32569	39	34	32509	75	43	32533	72	34	32513	366	36	32490	17	26	32508	32	29	32500	25	38	32505	7	42	32520	67	41	32507	72	39	32575	88
N1:32719	chr01	32646	32792	+1:SUT434;	4.16751	5	100	11.739	32719	358	29	32713	162	34	32704	46	34	32717	43	33	32714	94	34	32709	97	30	32718	467	27	32721	28	37	32711	81	26	32703	46	28	32723	11	17	32707	81	35	32718	45	22
N1:32915	chr01	32842	32988	-1:SUT434;	3.45308	6	95.25	24.186	32888	188	32	32923	42	27	32874	21	30	32907	24	30	32919	34	30	32912	27	33	32916	147	29	32918	34	25	32873	19	27	32890	23	26	32903	16	29	32914	92	28	32918	15	22	32938	34
N1:33205	chr01	33132	33278	-1:YAL061W; +8*:SUT435;	5.29007	6	100	9.642	33208	320	25	33206	52	24	33229	34	21	33230	20	21	33198	35	26	33210	20	34	33211	146	23	33240	88	27	33236	21	26	33226	15	16	33203	41	26	33232	156	26	33219	60	24	33221	223
N1:33363	chr01	33290	33436	+1:YAL061W; +7:SUT435;	4.03817	6	80.75	19.107	33391	282	33							33416	25	32	33346	21	37	33416	34	38	33361	127	30							33412	8	29				33419	71	42	33400	27	34	33394	108
N1:33555	chr01	33482	33628	+2:YAL061W; +6:SUT435;	3.97063	6	100	18.691	33543	366	31	33514	72	35	33597	58	35	33601	31	38	33520	38	36				33545	315	32	33515	69	33	33519	29	25	33587	16	34	33553	30	31	33598	257	33	33549	93	32	33549	261
N1:33740	chr01	33667	33813	+3:YAL061W; +5:SUT435;	3.41614	5	82	31.879	33753	342	38	33757	88	32	33753	55	33	33751	61	36	33761	63	29				33754	320	35	33716	64	40	33759	59	28	33770	52	32	33758	73	26	33749	202	36	33756	151	36	33753	283
N1:34016	chr01	33943	34089	+5:YAL061W; +3:SUT435;	2.30488	3	100	15.948							34029	64	36										34019	382	33	34034	48	34													34004	134	33
N1:34195	chr01	34122	34268	+6:YAL061W; +2:SUT435;	2.24755	3	100	16.523	34165	244	29	34124	66	44				34127	41	30	34122	52	43																						34164	149	31
N1:34345	chr01	34272	34418	+7:YAL061W; +1:SUT435;	3.40134	5	100	20.403	34318	453	30	34287	156	32	34294	81	29	34347	77	40	34310	111	30	34303	87	36	34309	1223	30	34365	168	37	34290	88	26	34290	59	31	34293	27	29	34290	165	40	34322	350	29	34286	276
N1:34540	chr01	34467	34613	+8:YAL061W; -1:SUT435;	2.05799	4	100	30.181	34484	58	41	34491	93	47	34540	35	44				34543	61	41	34511	47	28	34488	86	44				34502	29	34	34525	17	29							34473	16	37	34469	87
N1:34700	chr01	34627	34773	+9:YAL061W;	3.85511	6	75.25	18.541	34640	66	43	34708	24	49							34709	21	36							34634	44	33										34682	148	38	34631	10	41
N1:34873	chr01	34800	34946	+10:YAL061W; -1:YAL060W;	3.24336	5	100	23.597	34855	142	34	34886	47	34	34848	33	27	34838	24	35	34884	51	27	34846	37	28	34852	277	35	34827	342	30	34833	64	30	34832	60	23	34872	29	27	34861	158	30	34827	22	31	34845	42
N1:35047	chr01	34974	35120	+11*:YAL061W; 0:YAL060W;	3.27638	5	94.33	20.112	35038	113	33	35064	24	35	35000	8	33	35028	15	34	35038	34	32	35003	26	36	35036	114	35	35090	56	32	35002	17	29	34995	16	40	35092	5	29	35013	63	31	35095	23	37	35039	32
N1:35244	chr01	35171	35317	+2:YAL060W;	5.44606	6	100	8.295	35250	284	32	35248	79	34	35256	69	34	35298	45	42	35241	84	31	35254	54	31	35244	169	26	35249	79	32	35231	13	28	35242	20	23	35267	33	25	35240	109	29	35246	162	26
N1:35412	chr01	35339	35485	+3:YAL060W;	4.70706	5	100	6.731				35417	103	38	35415	57	44													35416	31	41	35418	18	29							35411	149	32
N1:35700	chr01	35627	35773	+5:YAL060W;	3.86557	6	90.25	31.935	35713	272	38	35755	108	37				35699	59	40	35712	52	28	35707	65	35	35708	112	39	35705	37	42	35657	8	42	35692	13	44	35661	9	21	35698	63	37	35717	118	38
N1:35869	chr01	35796	35942	+6:YAL060W; +4*:CUT439;	4.04359	6	88.25	23.235	35869	309	27				35863	81	35				35867	58	30	35865	69	25	35869	103	26	35867	19	24	35861	13	21	35864	10	13	35859	13	18	35856	55	30	35870	114	31	35869	115
N1:36163	chr01	36090	36236	+8:YAL060W; +2:CUT439;	4.60016	5	89	7.842	36169	421	35	36170	141	32	36169	110	29	36171	90	29	36166	104	27	36170	105	31	36158	180	29				36170	11	34				36151	12	11	36174	48	18	36166	187	31	36177	163
N1:36327	chr01	36254	36400	-1:YAL059W; +9*:YAL060W; +1:CUT439;	3.74032	5	77	21.811	36333	86	29	36331	29	29	36337	17	27	36327	23	21	36324	22	17	36331	25	23	36329	56	23	36326	8	34	36330	4	6	36330	3	9	36334	10	27	36332	21	26	36330	25	28	36339	20
N1:36592	chr01	36519	36665	+1:YAL059W; -1:CUT439;	5.32043	6	84.25	9.663	36594	224	25	36592	91	30	36592	67	25	36595	52	23	36591	51	22	36593	62	23	36599	191	23	36589	20	28	36599	14	16	36587	5	20				36589	33	20	36595	87	24	36590	145
N1:36762	chr01	36689	36835	+2:YAL059W;	4.26231	5	81.67	11.171				36758	106	29	36742	54	26	36750	31	25				36753	49	28				36771	17	33				36738	4	4	36753	4	19	36750	17	33	36752	98	23	36747	114
N1:37070	chr01	36997	37143	+4*:YAL059W;	5.27713	6	100	10.387	37072	285	26	37073	141	19	37069	46	25	37070	45	28	37072	85	28	37072	66	14	37071	183	22	37083	10	29	37070	13	24	37065	8	30	37070	12	9	37072	57	27	37072	112	24	37073	186
N1:37232	chr01	37159	37305	-1:YAL058W;	2.16887	4	39.5	30.649	37242	115	33	37242	19	36	37234	13	35	37233	13	25	37234	16	32	37240	21	29	37238	28	32	37272	7	13										37231	7	21	37235	12	26	37248	12
N1:37445	chr01	37372	37518	+1:YAL058W;	5.41045	6	83	9.375	37456	298	23	37456	113	24	37458	74	20	37456	53	22	37455	51	21	37456	53	25	37456	287	19	37457	16	27	37457	22	10				37456	9	27	37450	152	23	37454	128	19	37456	190
N1:37620	chr01	37547	37693	+2:YAL058W;	5.08715	6	100	11.548	37627	346	26	37632	181	34	37622	86	29	37618	62	28	37624	73	26	37628	61	29	37626	277	29	37674	35	24	37623	36	29	37595	21	19	37619	17	23	37624	130	33	37621	157	28	37625	263
N1:37771	chr01	37698	37844	+3:YAL058W;	3.8275	5	100	17.228	37785	386	31	37781	100	30	37778	51	28	37784	43	31	37775	74	27	37799	52	33							37784	19	25	37768	12	38				37786	143	31				37783	192
N1:37944	chr01	37871	38017	+4:YAL058W;	5.76166	6	100	5.329	37940	716	27	37946	216	26	37944	136	26	37945	124	24	37942	136	25	37953	64	31	37941	227	25	37938	15	17	37943	31	21	37940	22	19	37960	15	26	37962	67	30	37940	142	23	37948	139
N1:38110	chr01	38037	38183	+5:YAL058W;	3.50137	5	96.33	17.349	38119	347	31	38103	111	32	38132	78	27	38124	87	27	38108	81	33	38141	46	36	38116	76	31	38142	11	28	38094	17	26	38097	2	35				38150	61	35	38120	32	27	38097	28
N1:38289	chr01	38216	38362	+6:YAL058W;	3.84901	5	96.33	16	38299	382	35	38303	105	31	38301	85	32	38297	53	28	38303	91	27	38305	64	31	38300	107	36	38291	9	10	38299	23	23	38299	15	20	38297	5	22	38302	109	31	38300	36	31	38291	20
N1:38459	chr01	38386	38532	+7:YAL058W;	4.94008	6	100	37.157	38470	390	31	38484	160	30	38472	76	32	38472	42	24	38467	92	35	38473	71	28	38465	110	32	38450	17	13	38474	13	30	38472	13	28	38460	10	34	38461	72	29	38477	25	22	38485	17
N1:38641	chr01	38568	38714	+8:YAL058W;	5.09369	6	100	11.009	38643	434	23	38654	150	24	38642	74	21	38645	54	25	38637	78	27	38648	48	26	38646	108	22	38638	29	24	38639	23	24	38649	6	22	38639	9	22	38636	100	24	38647	24	29	38635	19
N1:38806	chr01	38733	38879	+9*:YAL058W;	5.6362	6	100	6.772	38808	242	21	38806	111	17	38809	53	26	38808	59	16	38805	48	25	38802	36	25	38809	93	20	38806	18	14	38811	12	8	38806	9	19	38807	6	22	38807	83	18	38807	39	13	38804	27
N1:38975	chr01	38902	39048	-1:YAL056W;	5.83897	6	100	4.324	38982	406	16	38978	154	19	38981	89	18	38980	70	13	38979	74	22	38977	63	19	38982	198	15	38972	29	22	38981	21	19	38980	10	8	38979	8	6	38969	120	24	38979	40	11	38980	86
N1:39264	chr01	39191	39337	+1:YAL056W;	3.2443	4	100	13.5	39254	300	23				39253	63	24	39267	33	26				39264	44	24	39258	173	25	39285	169	23	39261	35	18				39287	8	16	39268	237	30	39252	115	23	39254	241
N1:39417	chr01	39344	39490	+2:YAL056W;	4.53827	5	85.33	8.503	39421	424	20	39416	140	24	39425	74	23	39422	52	22	39428	57	16	39422	47	23	39421	102	22				39420	16	22	39416	9	16				39420	51	24	39423	166	14	39427	200
N1:39587	chr01	39514	39660	+3:YAL056W;	5.61151	6	100	6.969	39587	314	21	39594	114	27	39585	62	21	39585	48	24	39588	66	21	39583	44	25	39587	68	17	39594	62	13	39593	10	36	39591	10	21	39601	4	10	39598	26	33	39588	122	17	39590	131
N1:39753	chr01	39680	39826	+4:YAL056W;	5.90354	6	91.75	3.332	39759	640	18	39758	182	20	39756	98	21	39761	63	25	39758	104	20	39754	58	22	39758	106	18	39758	22	21				39762	8	15	39758	7	8	39753	35	26	39758	121	13	39761	192
N1:39922	chr01	39849	39995	+5:YAL056W;	2.67299	3	0	10.149	39922	272	29	39970	49	26																39916	14	28	39891	8	14				39911	3	34				39919	20	22
N1:40201	chr01	40128	40274	+7:YAL056W;	3.81242	5	80.33	15.71	40235	274	27																			40129	18	22	40129	4	6	40245	1	0				40239	27	43
N1:40397	chr01	40324	40470	+8:YAL056W;	2.46157	5	100	35.093	40407	431	35	40468	88	34	40347	81	38	40329	56	35	40420	66	33	40324	81	34				40375	7	30	40370	15	39										40400	12	37
N1:40545	chr01	40472	40618	+9:YAL056W;	1.94586	3	56	28.931	40559	456	37				40526	54	34	40509	46	41	40582	77	41	40475	42	37	40524	50	36	40560	7	27	40575	5	45	40518	2	0	40488	2	3	40551	5	21				40497	6
N1:40814	chr01	40741	40887	+11:YAL056W;	2.68518	4	100	29.01	40745	670	40										40745	99	38							40750	26	29	40772	8	30	40769	11	33	40757	9	31				40819	19	37	40812	4
N1:41143	chr01	41070	41216	+13:YAL056W;	2.66167	5	100	38.913	41149	535	34	41146	136	30	41151	126	32	41139	66	31	41148	114	30	41146	91	32	41155	76	35				41128	10	24	41150	8	34	41205	9	29	41143	27	29	41151	8	34	41144	7
N1:41441	chr01	41368	41514	+15:YAL056W;	4.29859	5	100	10.545	41442	731	31	41451	166	30	41448	113	32	41440	75	27	41447	107	30	41439	97	28	41446	96	33	41464	4	18	41445	3	21				41455	4	17	41444	58	37	41432	20	29	41446	12
N1:41596	chr01	41523	41669	+16:YAL056W;	3.53989	5	89	21.529	41597	648	31	41605	147	32	41599	95	36	41600	110	29	41603	112	32	41591	73	28	41600	92	33				41599	10	36	41545	12	38	41618	1	0							41596	5
N1:41765	chr01	41692	41838	+17*:YAL056W;	3.77115	4	100	6.85				41765	68	30				41761	28	23	41763	46	30				41761	36	35	41761	6	13	41777	2	0	41714	4	24				41724	69	25	41726	12	17	41764	7
N1:41942	chr01	41869	42015	-1:YAL055W;	4.04271	5	53.67	15.215	41944	181	30	41952	66	27	41884	20	34				41924	23	31	41943	12	27	41945	26	25	41933	4	42				41902	2	12	41936	2	9	41886	15	35	41945	4	24	41947	3
N1:42224	chr01	42151	42297	+1:YAL055W;	4.95279	6	100	12.502	42225	352	23	42227	110	24	42230	57	27	42224	39	30	42226	71	27	42224	28	22	42224	167	25	42237	62	22	42227	23	22	42226	11	29	42234	26	27	42238	125	35	42225	97	24	42224	239
N1:42392	chr01	42319	42465	+2:YAL055W;	4.53286	5	77.67	8.718	42396	246	26	42407	101	30	42397	55	32	42400	35	32	42392	46	28	42388	48	32	42388	163	23	42387	22	27	42403	28	27	42445	27	32	42400	28	25	42394	299	29	42392	117	20	42403	221
N1:42565	chr01	42492	42638	+3:YAL055W;	4.29697	5	100	11.845	42561	237	30	42599	130	31	42572	47	32	42573	38	36	42582	43	33	42576	46	34				42568	18	21	42602	20	23				42550	14	30	42570	109	30	42570	66	29	42570	59
N1:42913	chr01	42840	42986	+13:YAL054C; +5*:YAL055W;	3.35526	5	71.67	19.715	42891	108	33	42888	27	37	42897	20	33							42953	47	38	42896	106	33	42885	1	0	42900	4	44	42898	2	22	42913	2	21				42903	38	28	42884	10
N1:43085	chr01	43012	43158	+12:YAL054C;	2.96564	5	85.67	32.799	43076	192	34	43042	49	34	43077	42	38				43020	55	43	43157	58	39	43077	249	34				43069	11	34	43070	9	32	43076	15	35	43012	19	37	43082	108	30	43074	17
N1:43288	chr01	43215	43361	+11:YAL054C; -1:SUT002;	4.57371	6	100	14.919	43294	290	31	43303	93	30	43283	85	39	43309	35	38	43303	75	31	43306	64	32	43300	528	30	43270	9	29	43231	12	30	43316	12	32	43252	14	28	43251	31	40	43300	204	29	43265	34
N1:43478	chr01	43405	43551	+10:YAL054C; +1:SUT002;	3.97358	5	89	13.682	43472	497	26	43475	89	29	43468	79	38	43479	31	26	43480	79	32	43473	73	31	43471	534	27	43479	13	20	43483	8	32	43488	10	25	43477	8	27	43489	20	28	43471	299	23	43475	43
N1:43639	chr01	43566	43712	+9:YAL054C; +2:SUT002;	4.89427	5	95.67	3.912	43639	295	30				43639	56	46	43710	36	27	43631	62	48				43637	204	32																43639	188	28
N1:43812	chr01	43739	43885	+8:YAL054C; +3:SUT002;	3.67125	4	100	8.302	43811	333	29				43809	58	35				43813	67	41				43809	221	27				43753	10	41										43810	187	19	43812	28
N1:44128	chr01	44055	44201	+6:YAL054C; +5:SUT002;	4.20238	6	72.5	16.158										44193	29	35										44101	10	47	44102	4	47	44110	2	27				44068	16	39
N1:44315	chr01	44242	44388	+5:YAL054C; +6:SUT002;	4.44371	6	100	16.371	44304	508	34							44385	35	42	44282	85	41				44280	121	39	44278	13	24	44330	10	29	44355	6	29	44352	8	13				44283	46	30	44284	100
N1:44472	chr01	44399	44545	+4:YAL054C; +7:SUT002;	4.77928	6	91.75	13.367	44468	557	28	44485	65	35	44453	73	35				44463	66	33	44401	59	44	44486	134	32	44504	6	35				44524	6	33				44493	13	29	44489	27	30	44489	136
N1:44653	chr01	44580	44726	+3:YAL054C; +8:SUT002;	4.97886	6	97	19.631	44651	480	31	44674	68	33	44631	68	37	44591	31	39	44643	53	35	44581	58	37	44646	95	31	44653	9	31	44649	8	43										44649	32	27	44673	151
N1:44826	chr01	44753	44899	+2:YAL054C; +9:SUT002;	3.61344	4	73.5	9.106	44823	364	27	44874	57	36							44833	45	35				44827	57	23	44811	17	44	44818	10	42	44808	9	42	44819	6	26				44825	21	19	44874	182
N1:44993	chr01	44920	45066	+1:YAL054C; +10:SUT002;	4.99661	6	99.5	16.133	44985	599	20	45033	71	32				44988	25	33	44990	78	22	45019	85	31	44983	81	29	45057	73	39	45031	20	26	44990	53	29	44993	16	28				44987	21	22	45036	195
N1:45159	chr01	45086	45232	0:YAL054C; +11:SUT002;	4.3922	6	84	16.452	45166	242	23				45125	33	33				45163	19	27				45141	29	37				45217	4	27				45148	3	34	45176	2	29	45150	6	16
N1:45443	chr01	45370	45516	-1:YAL053W;	1.89967	3	50.5	25.942				45400	2	32													45380	4	31													45377	2	1
N1:45639	chr01	45566	45712	0:YAL053W;	1.17946	2	50	24.749	45634	9	43	45580	1	0				45625	2	25	45582	3	9	45593	1	0	45583	4	31				45595	1	0							45694	1	0
N1:45807	chr01	45734	45880	+1:YAL053W;	2.61833	3	50	11.06	45791	75	26	45809	32	31	45776	9	23	45816	23	22	45824	23	25	45790	15	31	45785	41	26	45768	29	33	45828	2	11	45807	1	0							45810	12	23	45770	40
N1:45969	chr01	45896	46042	+2:YAL053W;	5.91801	6	100	3.077	45974	687	16	45977	108	22	45974	105	18	45974	91	22	45974	103	20	45974	89	21	45973	296	15	45981	144	27	45977	40	20	45976	21	14	45976	16	8	45974	207	23	45972	534	12	45975	652
N1:46136	chr01	46063	46209	+3:YAL053W;	4.50046	5	100	8.916	46146	317	23	46146	81	32	46131	75	28	46135	44	23	46141	41	22				46148	82	25	46172	58	40				46173	7	27				46140	52	25	46147	155	25	46166	185
N1:46303	chr01	46230	46376	+4:YAL053W;	5.07607	6	83.5	12.533	46328	626	31	46357	174	24	46292	126	31	46295	68	32	46293	108	29	46294	88	32	46333	153	30	46355	63	31	46334	23	27				46295	9	23	46322	84	28	46328	260	28	46341	345
N1:46469	chr01	46396	46542	+5:YAL053W;	3.82622	4	100	5.916	46488	372	26	46517	118	35													46484	110	25				46481	8	17	46477	12	16	46471	10	19	46479	46	29	46485	143	21
N1:46621	chr01	46548	46694	+6:YAL053W;	3.53248	5	99	16.529	46638	576	27				46613	102	30	46613	71	31	46615	128	20	46616	52	30				46645	17	24							46632	13	24	46659	22	35	46636	83	27	46645	52
N1:46795	chr01	46722	46868	+7:YAL053W;	3.93638	6	86	33.484	46807	313	32	46806	110	38	46809	60	40	46824	37	31	46798	51	31	46810	45	41	46799	42	28	46810	3	25				46830	5	39	46790	2	0	46806	17	40	46801	35	25	46818	30
N1:46978	chr01	46905	47051	+8:YAL053W;	1.00204	3	61.5	64.023	47041	274	37	47041	93	35	47040	48	33							47049	55	36				47014	11	30				47015	1	0	47050	6	23				46962	7	21	47039	5
N1:47136	chr01	47063	47209	+9:YAL053W;	3.21969	5	99.67	25.417				47198	89	32							47110	70	39	47200	76	35	47091	30	38	47201	20	30	47119	5	21							47136	7	35	47175	12	27	47201	5
N1:47288	chr01	47215	47361	+10:YAL053W;	1.91591	4	71.33	30.653	47283	352	35				47228	75	37										47300	35	38										47290	3	31	47317	9	26
N1:47468	chr01	47395	47541	+11:YAL053W;	4.1395	5	94.75	28.043	47473	562	26	47473	180	24	47475	88	31	47473	70	29	47454	82	31	47471	85	31	47476	44	34	47471	10	27				47441	6	20	47455	6	11	47474	12	21	47434	19	32	47467	12
N1:47758	chr01	47685	47831	+13:YAL053W;	4.39369	6	91.75	16.931	47753	587	29				47740	121	37				47748	108	31				47758	51	28	47761	2	0				47722	5	37	47756	6	20	47754	17	31				47762	13
N1:48079	chr01	48006	48152	+15:YAL053W;	4.38317	6	89.75	14.94	48097	366	30	48095	90	31	48079	57	33	48069	60	22	48061	99	28	48052	86	28	48100	47	21	48087	12	18	48049	6	19	48041	8	22	48039	4	10	48067	41	29	48101	9	26	48096	17
N1:48252	chr01	48179	48325	-1:YAL051W; +16*:YAL053W;	3.49556	4	100	10.782	48254	197	31	48261	48	23	48251	28	27	48243	28	28	48259	20	24	48247	17	30	48252	17	24	48262	5	24				48191	6	30	48196	7	25				48321	2	2	48261	5
N1:48421	chr01	48348	48494	0:YAL051W;	1.62169	2	100	15.556							48398	4	30
N1:48572	chr01	48499	48645	+1:YAL051W;	3.26007	5	100	23.742	48543	380	28	48533	141	36	48553	80	31	48535	77	31	48527	60	31	48527	97	27	48534	286	30	48548	56	35	48570	28	28	48584	19	38	48571	19	30	48549	154	30	48538	159	27	48535	238
N1:48747	chr01	48674	48820	+2:YAL051W;	5.50441	6	75.25	8.256	48736	324	30				48751	54	34	48738	36	29	48731	52	33	48708	40	31	48739	117	31	48748	29	36	48734	23	26				48751	7	20	48729	73	30	48738	110	28	48752	148
N1:48911	chr01	48838	48984	+3:YAL051W;	2.83752	4	100	16.462	48916	509	35	48845	110	34	48909	79	33				48918	96	33	48869	80	33	48916	161	34	48927	12	32	48911	14	40	48926	5	2	48913	13	31				48915	149	26	48918	166
N1:49086	chr01	49013	49159	+4:YAL051W;	2.98763	5	99	26.969				49095	106	32				49030	70	30	49073	79	35	49027	90	26				49106	7	21	49081	15	36				49100	2	14	49025	35	30
N1:49270	chr01	49197	49343	+5:YAL051W;	3.93401	6	100	24.825	49226	368	28	49278	119	32	49253	68	33	49222	62	27							49225	73	32	49287	15	30				49296	2	19	49281	3	26	49233	15	35	49222	40	30	49279	37
N1:49534	chr01	49461	49607	+7:YAL051W;	3.33115	6	88.25	24.75	49546	592	28	49547	109	36	49548	111	30	49539	83	28	49544	103	28	49545	77	30	49541	49	34				49527	7	30	49575	4	31	49534	10	20	49540	19	31	49544	26	19	49539	10
N1:49725	chr01	49652	49798	+8:YAL051W;	3.80432	6	93.5	38.861				49742	142	28	49701	84	39							49704	96	43				49741	11	22							49718	5	37	49699	5	26				49745	5
N1:49885	chr01	49812	49958	+9:YAL051W;	1.47475	3	78	31.607	49883	378	28				49876	54	29	49873	69	28	49877	69	25	49875	56	35	49880	37	29				49873	4	25	49884	5	14	49896	5	25				49876	10	17	49895	2
N1:50058	chr01	49985	50131	+10:YAL051W;	4.39769	6	100	15.922	50052	702	30	50130	285	30	50056	111	30				50129	164	39				50129	115	37	50080	21	20	50057	11	32	50123	8	33				50128	12	34	50046	10	23	50049	6
N1:50362	chr01	50289	50435	+12:YAL051W;	4.24905	5	92.67	11.929										50338	53	30	50340	52	28				50339	34	35	50362	5	24	50410	4	23	50357	4	23	50327	7	14	50361	14	34
N1:50654	chr01	50581	50727	+14:YAL051W;	2.24314	3	100	16.803	50697	384	34	50655	84	34	50696	51	32	50692	82	39	50691	54	33	50651	45	36	50648	35	31	50624	9	28	50645	3	4	50694	4	11				50588	4	42	50706	5	46
N1:50858	chr01	50785	50931	+15:YAL051W;	2.97428	5	91.67	21.052	50865	656	28	50866	196	32	50860	121	28	50861	131	26	50867	102	30	50864	106	34	50863	68	27	50863	18	27	50860	6	37	50861	10	21	50861	3	12	50861	8	31	50863	13	29	50862	4
N1:51044	chr01	50971	51117	+16:YAL051W;	3.87438	6	90.25	23.51	51026	502	44	51088	171	38	51018	90	47	51088	92	37	51089	124	39	51032	86	45	51042	57	39	51031	10	19				51029	7	45				51102	14	38	51054	4	30	51095	10
N1:51210	chr01	51137	51283	+17:YAL051W;	4.56149	5	100	8.468	51212	587	37				51230	130	34							51229	94	29	51210	74	37	51191	9	30	51178	4	25	51222	4	30	51204	4	29				51216	11	41
N1:51357	chr01	51284	51430	+18:YAL051W;	2.63458	4	98.5	35.612																									51400	9	39	51399	11	32				51299	16	33	51420	5	28
N1:51571	chr01	51498	51644	+19:YAL051W;	2.65654	5	100	23.231				51630	92	29	51622	53	31							51595	66	33	51596	75	31	51612	12	25	51598	10	25	51574	3	29	51510	7	35				51629	9	29
N1:51744	chr01	51671	51817	+6*:YAL049C; +20*:YAL051W;	1.65174	2	92	14.849	51727	76	43				51812	18	33				51739	19	29	51742	12	45																51748	4	49				51674	1
N1:51948	chr01	51875	52021	+5:YAL049C;	3.03832	6	96.75	32.216	51956	280	34	51941	103	32	51967	61	32	51928	35	25	51932	56	30	51933	65	29	51941	50	36				51915	4	27	51955	8	17				51931	34	35	51960	23	34	51929	18
N1:52114	chr01	52041	52187	+4:YAL049C;	3.76455	5	100	21.119	52121	534	35	52155	130	29	52155	91	28	52095	63	31	52097	93	31	52115	78	31	52112	169	30	52090	11	43	52129	18	27	52180	4	27	52082	10	23	52101	48	25	52115	76	25
N1:52271	chr01	52198	52344	+3:YAL049C;	2.46379	4	100	27.958	52272	362	30							52264	63	25	52268	70	26	52263	71	20	52260	122	25	52265	23	21							52254	8	10	52259	53	24	52264	75	25	52257	124
N1:52431	chr01	52358	52504	+2:YAL049C;	3.87557	4	100	4.924	52431	275	32	52433	66	33	52430	34	29	52433	32	27	52434	40	27	52425	41	36	52432	65	28	52437	32	32	52425	15	21	52372	11	32	52424	6	23	52426	73	35	52435	63	26	52434	116
N1:52590	chr01	52517	52663	+1:YAL049C;	5.22761	6	100	11.167	52610	310	29	52595	107	43	52597	73	28	52593	70	28	52593	76	31	52592	75	31	52603	295	25	52590	218	28	52599	46	21	52603	25	21	52606	12	23	52594	243	28	52611	113	24	52605	256
N1:52883	chr01	52810	52956	+12:YAL048C; -1:YAL049C;	4.12849	6	94.5	26.227	52889	209	34	52885	86	30	52884	46	30	52890	39	21	52885	34	26	52895	27	32	52888	188	30	52899	94	24	52889	28	24	52902	8	22	52882	18	23	52894	218	24	52841	22	27	52889	104
N1:53058	chr01	52985	53131	+11:YAL048C;	4.41096	6	100	17.394	53050	429	35	53057	117	28	53044	75	27	53046	58	31				53058	56	28	53042	267	26				53045	25	21	53055	15	26	53069	9	23	53062	237	23	53044	91	26	53044	174
N1:53218	chr01	53145	53291	+10:YAL048C;	3.86125	5	99.25	15.556	53209	329	36	53214	97	33	53219	45	38	53216	52	33	53162	69	35	53212	33	29	53219	116	38	53197	54	21	53209	12	26	53210	19	21				53221	93	31	53215	22	34	53217	35
N1:53376	chr01	53303	53449	+9:YAL048C;	5.07603	6	100	11.572	53367	446	32	53369	173	26	53373	79	30	53372	70	31	53370	89	24	53369	59	32	53367	162	31	53369	51	35	53366	24	27	53364	23	21	53362	8	30	53387	117	34	53373	36	32	53374	38
N1:53535	chr01	53462	53608	+8:YAL048C;	3.84858	5	100	14.782	53550	535	40	53547	190	33	53585	109	41	53554	74	29	53538	107	30	53541	69	37	53548	177	39	53561	37	31	53514	16	29	53586	26	36	53550	14	39	53595	207	36				53549	25
N1:53710	chr01	53637	53783	+7:YAL048C;	2.91922	5	100	33.687				53700	113	29				53720	73	32	53706	99	36	53694	56	34							53767	9	35										53661	38	37	53774	9
N1:53880	chr01	53807	53953	+6:YAL048C;	3.63761	6	93.75	32.669	53811	295	37	53885	95	41	53813	45	43	53932	44	37				53877	35	42				53811	13	39							53812	7	22	53945	68	35
N1:54088	chr01	54015	54161	+5:YAL048C;	3.61632	4	100	8.963				54083	72	33				54084	40	31				54082	38	25				54074	22	28							54084	7	38							54078	18
N1:54248	chr01	54175	54321	+4:YAL048C;	5.66793	6	99.5	6.306	54257	189	33	54236	77	32	54251	37	36	54251	39	37	54250	46	31	54255	24	28	54258	61	36	54230	14	38	54250	5	31	54197	5	12	54247	7	40	54250	86	22	54247	62	30	54245	53
N1:54425	chr01	54352	54498	+3:YAL048C;	4.96976	6	100	12.64	54435	536	28	54427	188	29	54430	117	23	54429	97	26	54431	104	28	54427	103	21	54439	297	25	54430	44	27	54444	38	21	54432	43	23	54430	17	24				54432	259	27	54427	271
N1:54583	chr01	54510	54656	+2:YAL048C;	4.79375	6	100	19.065	54588	216	34	54582	108	25	54599	76	30	54593	40	29	54595	45	22	54591	67	30				54584	23	31				54594	17	32	54601	18	33	54582	113	34	54579	89	32	54583	188
N1:54749	chr01	54676	54822	+1:YAL048C;	3.92776	6	100	17.83	54743	226	28	54744	86	24				54795	22	29	54773	42	28	54754	34	18	54740	169	29	54740	33	24	54796	16	29				54755	8	29	54741	119	24	54741	104	29	54740	157
N1:54945	chr01	54872	55018	-1:YAL048C; +13*:YAL047C;	2.12746	4	100	25.489	54944	93	33	54941	35	30	54953	21	27	54985	28	31	54943	18	34	54961	17	29	54959	100	27	54978	43	21	54957	7	19	55005	22	29				54979	23	34	54998	19	44	54972	24
N1:55139	chr01	55066	55212	+12:YAL047C;	5.92286	6	100	2.994	55144	371	28	55145	94	27	55140	102	27	55143	77	27	55139	73	27	55143	93	23	55146	387	24	55137	71	22	55144	20	19				55143	16	16	55145	95	27	55147	79	26	55141	49
N1:55307	chr01	55234	55380	+11:YAL047C;	5.02987	6	99.25	11.548	55317	222	34				55312	42	32	55313	54	32	55290	53	32	55320	38	38				55314	17	29	55324	8	32	55294	11	30	55298	4	25	55315	23	36	55333	18	38	55288	5
N1:55476	chr01	55403	55549	+10:YAL047C;	2.60827	3	72	11.24	55477	165	34	55471	49	31	55487	39	28	55479	42	32	55470	20	26	55482	32	37	55486	52	44	55476	10	29				55469	9	23										55463	4
N1:55647	chr01	55574	55720	+9:YAL047C;	4.17587	5	78	12.198	55639	440	32	55629	148	21	55647	94	24	55638	84	26	55638	76	31	55635	69	27	55637	107	33	55638	10	35	55627	6	29	55634	3	21	55632	5	21	55641	7	27				55633	7
N1:55812	chr01	55739	55885	+8:YAL047C;	4.74106	6	82.75	15.423	55798	421	31	55801	129	30	55804	60	24	55804	64	28	55801	71	27	55800	65	28	55798	82	30	55793	7	26	55808	5	8	55798	7	26				55798	13	22	55803	19	19	55814	4
N1:55978	chr01	55905	56051	+7:YAL047C;	3.34109	5	93	19.473	55977	252	29										56005	34	28	55972	32	32				55967	6	11							56010	3	11	55969	10	23				55981	4
N1:56143	chr01	56070	56216	+6:YAL047C;	4.19714	6	100	16.79	56144	877	25	56151	217	24	56156	155	21	56157	106	24	56157	139	23	56150	123	22	56150	281	24	56160	31	23	56160	35	26	56172	36	25	56162	23	20	56148	74	26	56145	79	23	56156	52
N1:56311	chr01	56238	56384	+5:YAL047C;	4.10048	5	100	12.911	56335	306	21	56326	104	18	56334	61	26	56326	50	20	56334	45	21	56325	44	21	56334	124	25	56314	9	11	56337	8	24	56330	17	26	56336	9	26	56305	42	23	56331	47	23	56337	60
N1:56487	chr01	56414	56560	+4:YAL047C;	5.43123	6	78.25	8.329	56492	288	23	56481	92	22	56489	40	24	56495	48	28	56497	68	23	56495	46	17	56489	78	28				56502	9	21	56516	6	18	56484	8	26	56486	31	29	56490	42	22	56495	68
N1:56652	chr01	56579	56725	+3:YAL047C;	4.89951	6	100	13.145	56646	422	27	56662	151	24	56652	84	22	56666	45	26	56674	76	28	56643	72	24	56645	223	25	56643	19	25	56664	28	16	56683	19	10	56652	18	18	56657	115	25	56642	151	22	56647	286
N1:56823	chr01	56750	56896	+2:YAL047C;	5.91932	6	100	3.061	56824	428	20	56826	149	21	56824	80	22	56827	60	19	56827	84	20	56823	74	22	56823	289	21	56825	43	19	56824	36	26				56820	15	19	56820	200	22	56823	212	17	56823	265
N1:57022	chr01	56949	57095	+3*:YAL046C; +1:YAL047C;	3.92623	4	100	3.775	57026	156	18	57028	58	23	57026	37	19	57032	21	19				57036	35	25	57027	199	13	57027	20	23	57031	23	18	57025	3	8				57031	108	19				57029	90
N1:57184	chr01	57111	57257	+2:YAL046C; -1:YAL044W-A; -1:YAL047C;	5.95025	6	78	2.401	57178	194	32				57175	36	31	57179	17	25	57179	48	26				57182	195	26	57175	24	22	57185	36	19	57187	22	23	57165	18	25	57183	163	27	57179	101	24	57179	112
N1:57349	chr01	57276	57422	+1:YAL046C; 0:YAL044W-A;	5.38658	6	100	8.959	57361	441	20	57357	153	19	57357	82	21	57362	51	19	57358	101	21	57358	88	19	57360	890	17	57355	198	18	57344	126	20	57349	76	22	57359	91	14	57353	395	21	57356	264	17	57360	440
N1:57555	chr01	57482	57628	-1:YAL046C; +1:YAL044W-A;	5.87274	6	100	3.899	57560	495	16	57557	164	20	57557	82	17	57561	55	15	57554	84	22	57561	72	17	57560	1117	15	57558	194	13	57558	145	13	57559	78	12	57556	62	16	57553	537	19	57559	350	15	57559	505
N1:57726	chr01	57653	57799	+2:YAL044W-A;	5.74425	6	100	5.502	57727	492	19	57737	149	25	57726	69	27	57733	48	27	57730	71	32	57730	82	20	57729	635	21	57728	131	23	57729	99	19	57734	58	22	57736	27	20	57726	487	18	57730	284	18	57734	494
N1:57919	chr01	57846	57992	+4*:YAL044C; +3:YAL044W-A;	2.64648	3	40	10.599	57911	56	27	57903	33	38	57917	13	33	57936	12	38	57901	16	43	57925	9	25	57906	89	30	57916	20	22	57926	13	28	57911	8	17	57934	4	25	57889	45	36	57921	21	30	57912	50
N1:58076	chr01	58003	58149	+3:YAL044C; +4*:YAL044W-A;	4.13555	5	82.67	12.422	58080	237	33	58092	85	35	58096	61	28	58089	31	33				58088	38	29	58084	227	28	58071	90	32	58101	38	28	58086	26	15	58084	22	28	58073	169	29	58094	162	27	58095	315
N1:58269	chr01	58196	58342	+2:YAL044C;	4.3769	5	78.33	10.474	58249	214	31	58279	83	27	58258	47	30	58239	40	34				58245	49	28	58248	241	28	58251	138	28	58253	55	24	58244	34	27	58246	40	24	58246	327	27	58251	166	27	58270	372
N1:58432	chr01	58359	58505	+1:YAL044C;	4.78323	6	100	12.859	58426	351	23	58439	129	20	58432	71	23	58425	33	27	58438	56	28	58432	54	23	58432	465	22	58441	317	23	58433	131	19	58431	53	23	58430	53	22	58429	495	23	58428	241	19	58436	467
N1:58713	chr01	58640	58786	-1:YAL044C;	3.66656	6	92.25	27.23	58718	330	24	58710	95	27	58714	51	23	58714	72	22	58719	63	29	58714	51	23	58716	233	24	58715	134	22	58714	59	23	58717	44	15	58723	30	24	58717	567	23	58713	21	24	58701	37
N1:58885	chr01	58812	58958	+14*:YAL043C;	2.77808	4	100	26.107	58885	277	30	58874	103	28	58876	68	27	58887	40	24	58866	56	27	58884	69	20	58889	102	27	58871	51	24	58884	24	23	58896	27	18	58892	8	18	58886	221	26	58872	6	19	58883	12
N1:59078	chr01	59005	59151	+13:YAL043C;	3.14717	5	77	21.114							59024	54	34				59020	40	38				59075	106	35	59068	35	44	59055	16	35	59060	8	34	59076	15	41	59066	91	35				59046	6
N1:59259	chr01	59186	59332	+12:YAL043C;	1.65889	5	73	44.483	59217	417	30	59197	102	38	59213	93	33	59215	60	29	59205	97	24	59216	69	25							59217	13	35	59213	22	20							59208	16	16	59218	7
N1:59429	chr01	59356	59502	+11:YAL043C;	3.68269	5	66.33	26.033	59412	480	34	59499	174	43	59405	113	31	59389	50	32	59402	63	36	59408	61	38	59403	90	31	59499	20	36	59381	10	30	59389	14	28	59392	9	23	59396	54	31	59394	18	27	59374	13
N1:59589	chr01	59516	59662	+10:YAL043C;	2.96305	4	100	19.638	59563	558	27				59564	106	30	59557	91	29				59557	93	31	59564	67	28				59574	17	32				59578	22	36	59565	78	36	59564	31	22
N1:59751	chr01	59678	59824	+9:YAL043C;	2.96728	5	89.33	22.367				59680	188	35	59711	117	36				59693	108	32	59736	85	36	59728	78	35	59692	50	26	59729	23	39				59772	31	31	59715	92	31				59681	20
N1:59903	chr01	59830	59976	+8:YAL043C;	4.16927	5	84.33	12.276	59889	771	22	59861	152	39	59894	138	29	59887	99	27	59884	123	27	59891	115	33	59889	109	24	59902	21	27	59891	21	27	59901	18	26				59874	48	29	59883	71	20	59888	23
N1:60071	chr01	59998	60144	+7:YAL043C;	5.41984	6	91.75	8.803	60067	780	26	60038	191	31	60067	123	26	60067	104	24	60072	156	26	60070	173	23	60067	138	28	60064	57	29	60066	28	23	60062	26	15	60070	33	20	60064	58	24	60065	68	17	60064	33
N1:60234	chr01	60161	60307	+6:YAL043C;	5.34105	6	100	9.368	60221	498	26	60227	134	35	60223	107	29	60221	56	24	60225	116	26	60225	104	25	60222	81	26	60230	27	29	60222	11	20	60229	22	23	60221	11	10	60233	35	34	60221	81	18	60219	38
N1:60393	chr01	60320	60466	+5:YAL043C;	4.16194	5	80.67	13.096	60382	304	26	60386	122	37	60391	77	27	60390	68	26	60395	84	24				60388	80	31	60384	22	19	60384	8	28	60384	23	19	60387	7	7	60387	49	25	60384	93	22	60389	73
N1:60550	chr01	60477	60623	+4:YAL043C;	2.91877	4	100	27.97							60543	110	26	60539	66	23	60544	75	27	60538	72	24				60549	10	25	60532	11	18	60534	20	27	60543	13	20	60539	44	23	60535	107	22	60539	86
N1:60700	chr01	60627	60773	+3:YAL043C;	5.10857	6	86	10.807	60690	494	23	60680	186	32	60694	106	28	60692	58	28	60694	89	27	60706	109	30	60688	138	25	60708	24	22	60695	23	26	60710	23	26	60702	14	21	60701	68	27	60688	233	20	60698	229
N1:60859	chr01	60786	60932	+2:YAL043C;	4.18213	5	82	11.576	60854	312	25	60854	99	30	60852	82	29	60853	39	21	60853	53	27	60854	55	24	60855	116	22				60849	8	26				60858	5	27	60858	44	22	60853	139	20	60859	187
N1:61025	chr01	60952	61098	-1:YAL042W; +1:YAL043C;	5.43777	6	91.75	8.618	61022	590	15	61027	240	18	61026	134	18	61025	94	14	61024	162	19	61024	146	16	61023	456	14	61034	49	15	61021	43	17	61020	30	10	61024	21	17	61026	140	17	61022	378	13	61028	646
N1:61331	chr01	61258	61404	+1:YAL042W; -1:YAL043C;	4.60878	5	89.67	7.778	61334	301	22	61331	104	23	61330	81	19	61333	53	17	61335	95	18	61327	65	17	61332	350	18	61333	84	22	61334	26	17	61330	22	16	61334	18	21	61329	206	20	61331	264	15	61332	284
N1:61492	chr01	61419	61565	+2:YAL042W;	4.82855	5	100	5.07	61496	492	19	61501	194	20	61494	121	22	61494	60	21	61494	154	16	61496	73	19	61497	202	18	61507	64	15	61497	27	14	61494	20	13	61490	7	9	61492	81	22	61493	281	15	61498	389
N1:61654	chr01	61581	61727	+3:YAL042W;	4.76835	5	78	5.916	61646	485	20	61650	127	21	61646	123	27	61649	45	26	61646	116	22	61652	64	21	61647	159	18				61646	32	18	61648	13	19	61664	5	20	61647	94	22	61648	210	18	61650	229
N1:61819	chr01	61746	61892	+4:YAL042W;	5.5236	6	91.75	7.757	61817	669	23	61810	203	24	61814	136	24	61827	84	22	61821	151	25	61816	142	26	61821	247	22	61817	40	20	61817	30	17	61819	36	18	61820	22	13	61813	74	24	61816	272	18	61823	237
N1:61989	chr01	61916	62062	+5:YAL042W;	4.59464	5	60.33	8.106	61979	421	31				61987	79	34	61990	42	30							61985	112	30	62051	11	37				61988	12	18	61997	3	26	61988	36	30	61990	99	27	61994	54
N1:62189	chr01	62116	62262	+6:YAL042W;	2.35423	5	86	39.271	62164	389	29	62121	102	39	62134	73	34	62184	41	30	62129	78	38	62132	61	36	62171	103	33				62140	10	24	62184	34	31	62179	10	33	62177	34	39	62180	64	27	62187	34
N1:62346	chr01	62273	62419	+7:YAL042W;	3.20259	5	86	27.943	62339	415	31	62340	99	38	62343	75	31	62345	52	32	62346	71	28	62340	53	38	62341	144	25	62338	2	14	62345	22	34	62352	14	33	62343	8	14	62348	52	23	62343	70	26	62345	30
N1:62535	chr01	62462	62608	+8*:YAL042W; -1:YAL041W;	5.62075	6	83.5	6.812	62540	503	21	62537	188	18	62535	96	26	62533	58	21	62534	117	17	62536	108	17	62535	191	17	62537	27	23	62540	21	19	62536	19	21	62536	30	16	62536	91	17	62536	81	20	62540	56
N1:62815	chr01	62742	62888	+1:YAL041W;	4.92924	6	92.75	15.092	62823	412	19	62832	142	26	62818	71	25	62827	59	20	62827	97	28	62827	89	20	62820	396	20	62820	50	25	62812	46	22	62821	18	14	62832	22	19	62809	130	21	62823	288	17	62821	460
N1:62982	chr01	62909	63055	+2:YAL041W;	3.59712	4	83.5	9.129	62990	411	19	62992	155	19	62987	89	22	62984	69	22	62988	92	25	62985	87	22	62990	198	21	62984	45	18	62991	31	23	62982	14	13	62982	9	19	62975	87	19	62990	263	18	62989	424
N1:63148	chr01	63075	63221	+3:YAL041W;	4.65359	5	100	7.259	63147	693	15	63146	328	13	63143	127	18	63143	96	17	63146	202	15	63144	151	16	63145	191	16	63150	42	15	63141	41	19	63149	11	23	63148	21	15	63146	60	25	63144	374	14	63145	477
N1:63316	chr01	63243	63389	+4:YAL041W;	4.55651	5	96.67	8.349	63308	359	23	63309	99	29	63304	73	27	63301	55	27	63309	63	22	63308	54	20	63306	82	24	63304	15	26	63304	9	15	63311	9	9	63304	8	14	63304	37	23	63308	133	18	63306	152
N1:63482	chr01	63409	63555	+5:YAL041W;	3.41227	4	64.33	11.804	63478	389	21	63495	112	26	63478	75	29	63477	44	22	63479	88	23	63478	48	22	63479	61	22	63477	11	25	63480	9	17				63479	6	14	63479	16	27	63476	86	18	63481	87
N1:63630	chr01	63557	63703	+6:YAL041W;	3.09362	5	100	23.452	63639	591	26	63656	214	22	63631	90	30	63635	72	27	63641	118	25	63638	92	25	63640	83	30	63642	9	20	63641	16	25	63640	7	9	63641	3	21	63636	17	25	63638	84	23	63640	53
N1:63940	chr01	63867	64013	+8:YAL041W;	4.98319	6	80.75	11.57	63949	492	26	64002	115	33	63944	96	29	63938	76	23	63942	80	21	63940	66	30	63944	37	29	63953	8	16	63962	2	10	63947	10	28	63915	3	34	63951	11	32	63941	19	27	63952	15
N1:64230	chr01	64157	64303	+10:YAL041W;	3.87191	5	72.33	13.903	64260	382	29	64157	149	36	64257	60	23	64255	71	29				64255	40	37																			64266	12	30	64281	4
N1:64522	chr01	64449	64595	+12:YAL041W;	3.12016	4	83.5	15.903	64450	625	30	64460	185	37							64454	119	37	64454	133	42	64453	28	25				64455	4	17							64592	12	30	64455	14	14	64457	6
N1:64680	chr01	64607	64753	+13:YAL041W;	3.14457	6	99.25	35.011	64614	543	34	64631	161	31	64613	125	37	64725	71	38	64618	92	36	64691	89	39	64616	46	32	64627	8	18	64625	10	29	64618	5	37	64703	3	0				64731	10	43	64621	11
N1:64922	chr01	64849	64995	+14:YAL041W;	2.36977	4	88.33	35.157	64907	539	31				64912	112	33	64916	77	39	64912	89	34	64883	98	27	64913	42	30	64994	1	0	64915	5	18	64892	2	21				64874	13	35	64924	9	18	64907	3
N1:65161	chr01	65088	65234	+15:YAL041W;	2.90527	3	1	5.292	65184	337	33	65180	108	29	65181	59	37	65168	80	30	65169	54	33	65181	63	27	65186	34	40	65154	1	0	65155	6	30	65169	11	28										65176	9
N1:65326	chr01	65253	65399	+16:YAL041W;	5.50157	6	89	7.84	65333	338	36				65352	59	38	65334	64	36	65367	55	37	65365	55	34	65342	37	43	65361	7	21	65376	5	14							65331	17	32				65336	4
N1:65489	chr01	65416	65562	+17*:YAL041W;	2.64567	4	50	19.619	65494	121	30	65495	25	33				65493	18	37				65516	13	26	65503	12	23	65509	7	11							65527	2	11	65528	6	31	65486	1	0
N1:65686	chr01	65613	65759	+15*:YAL040C;	1.01387	2	100	35.355	65647	61	39				65631	13	37				65628	6	37				65733	10	32																			65630	1
N1:65842	chr01	65769	65915	+14:YAL040C;	3.7248	6	100	20.459	65829	539	27	65839	117	24	65839	97	26	65840	97	27	65835	96	30	65836	64	32	65883	64	30	65874	11	21	65891	11	30	65850	13	35	65855	7	25	65900	75	33	65832	41	27	65835	16
N1:66102	chr01	66029	66175	+12:YAL040C;	2.00339	4	83.5	45.07	66067	415	37	66068	90	37	66076	88	41	66073	74	38	66077	98	37	66078	78	36	66051	54	33	66070	14	29	66055	10	35	66069	16	29	66076	17	33	66114	173	34				66070	35
N1:66258	chr01	66185	66331	+11:YAL040C;	3.28851	6	100	34.793	66249	364	36	66251	118	38	66247	103	38	66244	81	40	66247	79	34	66242	61	41	66249	38	35	66224	5	21	66208	9	36	66224	26	24	66248	20	29	66303	108	44	66250	56	35	66246	48
N1:66511	chr01	66438	66584	+9:YAL040C;	2.07303	4	56	33.984																									66514	5	35							66498	11	26
N1:66670	chr01	66597	66743	+8:YAL040C;	2.01125	4	77	31.479	66675	329	40	66681	93	40	66612	56	39	66679	59	42	66679	74	37	66675	60	41	66675	26	41	66719	20	39	66703	2	26	66609	9	30	66687	16	37	66683	63	35	66675	46	35	66677	48
N1:66864	chr01	66791	66937	+7:YAL040C;	3.34849	5	89	19.018	66852	360	31	66877	92	37	66881	57	39	66849	72	31	66872	79	30	66871	73	33	66837	49	41				66880	9	24							66863	110	36	66856	126	30	66870	81
N1:67021	chr01	66948	67094	+6:YAL040C;	3.48452	5	81.33	33.712	67024	330	30	67063	117	41	67071	71	46	67030	47	33	67019	69	33				67058	42	35	67005	13	42				66951	12	34	66957	8	34				67018	84	31	67055	97
N1:67314	chr01	67241	67387	+4:YAL040C;	2.12949	4	100	32.212				67290	93	37				67331	50	43							67296	78	40										67309	9	26	67300	50	31	67301	176	32
N1:67491	chr01	67418	67564	+3:YAL040C;	2.94235	5	84.75	40.721	67442	367	39	67499	114	39	67505	94	42	67499	62	32	67423	89	37	67425	96	32	67450	165	42							67496	11	22	67462	11	25	67472	93	28	67465	215	38	67493	187
N1:67670	chr01	67597	67743	+2:YAL040C;	5.10105	6	100	25.637	67663	513	31	67664	229	23	67664	103	30	67667	83	21	67667	112	27	67658	106	25	67661	269	29	67656	47	30	67652	14	30	67655	8	20	67663	8	16	67647	20	32	67653	205	28	67658	281
N1:67823	chr01	67750	67896	+1:YAL040C;	3.10445	5	100	29.744	67829	298	28	67842	127	29	67839	62	27	67839	82	24	67844	79	31	67826	83	29	67822	378	29	67836	76	35	67829	25	31	67875	19	27	67816	8	37	67824	9	30	67829	78	28	67826	219
N1:68043	chr01	67970	68116	-1:YAL040C;	3.04928	4	96.33	15.055	68010	38	39	68001	34	29	68017	7	39	68018	9	20	67998	34	22	68009	26	22	67989	56	30	68016	20	26	68014	5	14	68088	4	55	67979	5	26	68016	11	27	68078	3	30	68017	12
N1:68192	chr01	68119	68265		2.98605	6	83.5	31.703	68232	45	33	68245	34	28	68242	16	30	68255	14	20	68251	63	27	68248	50	26	68243	194	30	68255	126	27	68246	42	26				68243	54	35	68246	227	28	68262	6	18	68255	3
N1:68345	chr01	68272	68418		1.00244	2	95	41.719																																								68404	1
N1:68519	chr01	68446	68592	-1:SUT003;	2.01692	3	50	26.889	68572	16	33	68503	7	34	68569	2	2				68465	3	15	68587	2	8				68566	6	8	68549	1	0							68566	13	37				68581	1
N1:68716	chr01	68643	68789	+6*:YAL039C; +1:SUT003;	3.14934	5	99	20.603	68738	217	25	68734	43	23	68742	13	22	68733	20	15	68744	45	21	68743	35	24	68742	248	21	68743	45	18	68745	24	19	68747	24	8	68742	28	21	68731	109	25	68737	65	21
N1:68887	chr01	68814	68960	+5:YAL039C; +2:SUT003;	2.18864	4	100	27.957													68904	44	27	68903	44	33																68881	117	29	68894	45	28	68872	25
N1:69063	chr01	68990	69136	+4:YAL039C; +3:SUT003;	2.97774	4	94.5	36.225	69054	203	31	69059	37	32	69039	30	38	69057	23	30				69051	44	33	69053	96	28				69079	18	29	69029	9	44	69030	15	28	69054	89	27	69054	74	28	69055	43
N1:69215	chr01	69142	69288	+3:YAL039C; +4:SUT003;	2.88084	4	44.5	23.472	69212	260	32	69207	58	36	69211	34	34	69214	25	31	69216	62	33	69210	52	27	69209	148	32				69287	40	44	69208	13	41	69204	14	41	69209	70	31	69211	125	23	69215	118
N1:69380	chr01	69307	69453	+2:YAL039C; +5:SUT003;	4.24078	5	79	11.628	69373	178	31	69387	49	31	69368	40	43	69367	20	26	69385	37	23	69363	36	33	69372	117	29							69370	20	38	69373	9	10	69358	101	31	69373	130	19	69383	176
N1:69538	chr01	69465	69611	+1:YAL039C; +6*:SUT003;	4.64627	5	100	7.416	69535	226	22	69547	69	26	69525	36	29	69537	31	18	69533	43	22	69516	50	28	69528	163	21	69549	150	31	69519	40	24	69540	7	28	69526	25	23	69515	111	29	69535	90	19	69548	159
N1:69698	chr01	69625	69771	0:YAL039C;	1.98631	3	54	41.617				69717	3	51																			69695	7	33				69716	1	0
N1:69938	chr01	69865	70011		3.23385	5	94.5	24.15	69924	72	37				69985	49	28	69991	46	29	69989	89	31				69992	205	37	69995	151	37	69988	36	30	69987	14	31	69988	14	28	69982	40	32	69986	10	41	69987	75
N1:70126	chr01	70053	70199		2.35884	4	78	27.604	70122	87	31	70119	141	21										70120	95	27
N1:70294	chr01	70221	70367		4.0446	6	100	19.849	70293	186	22	70288	91	22	70297	20	27	70287	19	28	70292	63	19	70293	74	22	70292	350	22	70285	61	33	70285	40	23	70305	11	34	70287	7	6	70286	20	22	70285	12	24	70284	36
N1:70506	chr01	70433	70579		3.04224	5	65	21.686	70538	124	30	70459	32	28	70554	19	33	70548	13	29	70459	26	31	70465	29	30	70530	22	39	70460	19	31	70575	6	17	70546	13	15	70577	5	29	70559	8	26	70560	3	1	70527	9
N1:70664	chr01	70591	70737		2.83546	3	50.5	7.024																						70679	22	31	70725	25	35
N1:70951	chr01	70878	71024		2.26168	3	80.5	32.853	70968	15	23				70965	5	32	70966	2	0							70991	9	37				70959	2	21	70971	4	29				70967	1	0				71011	3
N1:71244	chr01	71171	71317		1.01075	3	100	55.003	71226	5	11				71258	3	30	71209	3	31	71292	24	33	71288	2	1	71242	12	40				71254	4	18							71203	1	0	71288	1	0	71253	4
N1:71410	chr01	71337	71483		1.96506	3	50.5	21.932	71424	23	25	71441	57	30	71413	7	12	71436	21	30	71443	35	34	71448	10	27	71434	76	32	71440	37	24	71439	7	11	71420	14	32	71420	6	24	71425	32	24				71427	27
N1:71645	chr01	71572	71718	0:YAL038W;	1.00775	2	0	37.477	71685	78	36				71703	22	41	71698	32	32	71692	27	30	71694	25	32							71703	5	30	71687	8	30				71706	13	34				71694	68
N1:71817	chr01	71744	71890	+1:YAL038W;	4.07122	6	86	29.604	71858	237	35	71856	131	33	71863	63	35	71861	56	34	71863	71	35	71857	67	37	71847	106	34	71829	45	39	71859	19	37	71871	19	24				71868	62	38	71863	84	37	71862	274
N1:72019	chr01	71946	72092	+2:YAL038W;	2.02012	4	64	30.966	72030	228	42	72028	131	29	72029	76	35	72026	67	35	72018	105	30	72016	68	38	72033	66	40	72034	22	23	72035	27	34				72036	24	37	72017	54	35	72086	89	36	72029	290
N1:72190	chr01	72117	72263	+3:YAL038W;	1.99827	2	100	0.707										72174	39	35				72240	66	41	72219	21	36	72190	18	33				72188	22	29				72217	31	33
N1:72464	chr01	72391	72537	+5:YAL038W;	3.03405	5	74.33	23.618							72507	42	38	72415	44	38				72414	77	37	72417	40	34	72402	13	36	72507	10	34							72511	16	34	72436	50	28
N1:72736	chr01	72663	72809	+7:YAL038W;	3.18985	5	31	24.048	72742	181	39	72749	95	34	72759	84	40	72678	56	37				72752	79	33	72734	32	32	72677	27	41	72738	24	38	72743	31	41	72746	13	29	72751	22	40	72749	36	42	72734	131
N1:72930	chr01	72857	73003	+8:YAL038W;	2.59483	5	58.67	37.212	72946	178	37	72910	68	31										72961	72	39				72962	12	32	72914	14	37	72932	44	36	72939	15	28	72902	15	29	72942	28	34	72908	83
N1:73094	chr01	73021	73167	+9:YAL038W;	2.81435	3	78	7.506				73063	94	31	73071	66	37	73077	52	31	73065	67	40				73087	42	36	73122	19	31				73081	10	25				73058	21	35	73158	15	37	73070	75
N1:73248	chr01	73175	73321	+3*:YAL037C-A; +10*:YAL038W;	3.78484	5	90.33	29.407	73238	141	29	73234	120	21	73227	39	33				73223	75	30	73230	67	32	73237	34	31				73189	21	33	73304	2	31	73202	13	30	73277	4	28				73223	38
N1:73527	chr01	73454	73600	+1:YAL037C-A;	4.2411	6	97.25	24.523	73530	275	24	73528	255	19	73526	83	23	73530	90	17	73530	114	19	73527	100	17	73526	86	21	73524	24	14	73518	17	20	73523	16	17	73526	14	20	73527	30	27	73532	23	15	73520	33
N1:73683	chr01	73610	73756	0:YAL037C-A; -1:YAL037W; +2*:Unit002;	2.89357	5	90	22.165	73717	147	35	73717	85	28	73714	24	38	73716	23	30	73715	42	27	73714	32	29	73717	48	30	73720	12	29	73716	1	0	73715	7	22				73692	23	26	73715	8	26	73714	12
N1:73878	chr01	73805	73951	-1:YAL037C-A; 0:YAL037W; 0:Unit002;	4.10415	5	78	12.462	73879	324	24	73867	120	23	73871	46	23	73885	50	30	73870	52	22	73878	48	23	73881	98	24	73880	50	23	73892	18	25	73890	26	28	73864	10	14	73879	36	23	73890	29	18	73885	106
N1:74049	chr01	73976	74122	+2:YAL037W; -1:Unit002;	5.50585	6	89.5	7.967	74055	407	23	74051	168	21	74050	78	17	74053	72	18	74052	71	20	74049	78	18	74050	97	18	74051	26	16	74055	16	18	74055	17	7	74056	6	8	74054	55	22	74051	77	23	74050	173
N1:74220	chr01	74147	74293	+3:YAL037W;	5.89993	6	100	3.391	74224	535	22	74224	208	22	74223	83	26	74222	93	23	74221	89	26	74221	72	21	74223	215	22	74223	20	12	74228	10	17	74224	15	19	74205	5	10	74221	56	26	74220	58	24	74223	170
N1:74401	chr01	74328	74474	+4*:YAL037W;	4.68906	6	100	13.512	74393	385	27	74402	159	31	74404	82	30	74399	67	26	74383	73	33	74397	93	30	74402	193	25	74431	54	32	74410	14	21	74408	12	14	74391	15	29	74404	142	31	74394	58	20	74410	107
N1:74590	chr01	74517	74663		4.89051	6	100	13.545	74584	409	31	74592	146	38	74587	66	30	74576	43	29	74589	58	37				74587	123	34	74595	24	26				74590	13	23	74610	13	38	74596	70	44	74586	27	31	74591	45
N1:74760	chr01	74687	74833		5.06617	6	99.5	11.197	74769	324	37	74771	140	36	74767	65	34	74768	59	32	74771	71	32	74704	81	37	74767	107	31				74707	15	37	74765	5	35	74765	9	26	74762	114	33	74768	35	31	74773	24
N1:74926	chr01	74853	74999	+8*:YAL036C;	1.93122	4	50.5	28.779							74975	19	42	74979	13	45	74975	13	28	74871	15	37	74920	12	40				74905	2	35	74979	1	0				74913	4	27				74963	3
N1:75097	chr01	75024	75170	+7:YAL036C;	5.1073	6	94.5	10.71				75106	99	32	75168	65	29													75102	16	34				75162	14	29	75168	15	30	75159	45	38				75159	14
N1:75322	chr01	75249	75395	+6:YAL036C;	2.94825	6	90.25	39.439	75343	432	29	75323	166	35	75324	104	27	75301	87	31	75305	105	29	75344	93	28	75346	57	28	75329	19	40	75325	15	20	75319	11	12	75321	9	25	75318	31	33	75354	37	25	75328	25
N1:75504	chr01	75431	75577	+5:YAL036C;	3.86661	5	97.67	17.349	75508	385	29	75501	153	32	75497	101	23	75501	90	23	75501	99	24	75501	89	24	75511	85	28	75502	20	23	75510	21	24	75499	19	15	75494	7	32	75494	65	23	75509	67	21	75504	46
N1:75662	chr01	75589	75735	+4:YAL036C;	2.69216	4	100	22.015	75663	508	24	75654	255	24	75661	130	24	75662	122	19	75664	142	21	75662	132	20	75666	122	29	75659	13	25	75663	15	21	75658	5	14	75667	8	22	75663	28	25	75664	152	23	75658	138
N1:75830	chr01	75757	75903	+3:YAL036C;	5.20762	6	100	10.128	75830	694	19	75828	258	16	75827	144	18	75828	116	15	75829	194	15	75827	148	16	75828	195	17	75830	28	17	75825	24	22	75814	12	15	75825	18	24	75831	47	17	75827	312	17	75827	420
N1:75990	chr01	75917	76063	+2:YAL036C;	4.87992	5	100	4.207	75990	237	17	75996	96	21	75992	72	23	75992	43	10	75992	72	19	75992	53	16	75991	120	17	75996	20	26	75994	5	5	75994	9	3	75991	10	8	75995	55	17	75990	216	14	75993	264
N1:76155	chr01	76082	76228	-1:YAL035W; +1:YAL036C;	3.97697	5	100	13.565	76160	451	19	76166	227	18	76160	138	22	76161	98	14	76164	99	18	76161	120	15	76161	353	18	76164	20	22	76161	27	16	76166	10	18	76161	8	5	76159	60	19	76161	247	17	76163	533
N1:76455	chr01	76382	76528	+1:YAL035W; -1:YAL036C;	3.43742	4	100	11.087	76449	345	16	76448	166	21	76449	140	16	76449	115	15	76454	112	18	76451	115	11	76450	564	14	76447	72	14	76446	36	18	76450	23	11	76447	10	22	76448	123	15	76449	345	13	76448	624
N1:76605	chr01	76532	76678	+2:YAL035W;	5.87232	6	91.75	3.869	76606	689	17	76600	336	22	76607	147	16	76608	98	17	76606	192	23	76605	166	18	76607	318	16	76607	52	19	76603	18	24	76607	37	19	76609	12	21	76611	45	14	76606	250	13	76608	589
N1:76764	chr01	76691	76837	+3:YAL035W;	3.37225	5	82	21.51	76776	322	24	76787	148	25	76783	96	27	76787	67	20	76790	83	26	76787	69	21	76778	73	30	76766	19	23	76757	7	32	76783	9	16	76779	3	19	76782	28	25	76756	109	22	76784	132
N1:76924	chr01	76851	76997	+4:YAL035W;	2.48013	4	77.5	25.593	76933	700	21	76937	443	19	76940	160	26	76948	136	22	76941	251	19	76945	139	22	76935	105	25	76938	50	24	76937	16	17	76950	20	16	76947	12	12	76958	14	30	76932	176	23	76934	242
N1:77078	chr01	77005	77151	+5:YAL035W;	4.57516	5	79.33	8.106	77082	424	23	77085	186	22							77090	87	21				77087	65	22	77106	8	38	77111	4	25	77105	6	51							77085	73	17	77083	66
N1:77255	chr01	77182	77328	+6:YAL035W;	2.33368	4	100	20.532	77247	549	22	77276	111	24	77257	112	29	77272	77	22	77270	78	23	77274	89	24	77246	42	24	77282	18	33				77281	8	12				77258	23	26	77249	114	21	77254	71
N1:77402	chr01	77329	77475	+7*:YAL035W;	2.31738	5	73.33	25.807	77427	432	29	77438	107	28	77433	106	30	77432	78	19	77438	143	23	77432	69	27	77432	30	34	77432	22	21	77449	10	16	77434	15	17	77432	3	19	77430	20	29	77424	64	21	77437	18
N1:77580	chr01	77507	77653		2.78038	5	59.67	25.714				77622	121	33							77624	75	28				77618	21	26							77622	10	24				77602	14	31	77573	22	28	77618	15
N1:77885	chr01	77812	77958		2.95857	6	86.25	28.324	77896	546	26	77893	136	37	77897	139	27	77900	74	23	77893	84	28	77894	88	25	77897	32	28	77860	5	33	77930	8	13	77906	16	16	77909	5	11	77888	13	40	77893	28	29	77915	10
N1:78110	chr01	78037	78183		2.98187	5	75.67	33.396	78048	435	33	78104	147	36	78071	87	31	78079	95	35	78089	79	28	78057	79	32	78092	18	35	78085	9	33	78077	13	28	78113	3	16	78066	1	0	78077	7	29	78056	15	30
N1:78370	chr01	78297	78443		4.00181	6	78	29.976	78374	679	28	78377	158	35	78377	136	32	78380	113	31	78380	132	32	78378	132	27	78373	38	26	78372	9	24	78374	14	28							78363	25	28	78371	30	23	78366	18
N1:78546	chr01	78473	78619		2.64849	4	57.5	20.823	78562	395	35	78551	153	36	78561	104	33	78616	75	39				78557	67	30	78556	38	26				78538	9	35							78557	21	30	78548	14	41
N1:78714	chr01	78641	78787		1.32462	4	100	39.669																						78649	7	29	78688	10	30	78650	13	26	78655	4	11
N1:78863	chr01	78790	78936		2.35548	5	90.25	32.79	78835	479	35	78837	164	38	78839	142	31	78830	122	31	78829	158	33	78836	131	26	78799	40	37	78812	11	24	78850	9	31	78835	15	31	78829	13	25	78833	28	29	78852	18	36	78853	9
N1:79100	chr01	79027	79173		3.41008	6	100	26.734	79079	513	41	79078	126	30	79139	85	40										79082	40	39				79086	8	35	79172	16	43	79054	2	20	79163	17	38	79074	9	30	79063	7
N1:79263	chr01	79190	79336		3.58395	6	96.75	25.511	79242	439	36	79242	136	26	79322	59	42	79327	51	37							79247	47	40	79229	9	30							79245	7	40	79328	27	37	79318	18	43	79255	7
N1:79451	chr01	79378	79524	-1:YAL034W-A;	3.35397	6	74	21.068	79459	208	48				79490	27	19	79501	31	26	79514	27	39				79394	34	37	79394	4	34							79421	4	31	79480	11	28	79512	2	15	79484	8
N1:79733	chr01	79660	79806	+1:YAL034W-A;	5.96034	6	100	2.137	79731	451	17	79727	193	19	79734	90	20	79736	60	17	79730	65	19	79732	79	19	79732	163	15	79742	22	23	79737	20	10	79733	35	16	79727	39	20	79736	147	13	79729	184	12	79728	293
N1:79895	chr01	79822	79968	+2:YAL034W-A;	5.84743	6	100	4.29	79894	599	18	79892	173	24	79896	113	21	79895	71	17	79890	78	20	79896	88	12	79894	138	17	79897	11	13	79896	17	10	79895	26	18	79901	12	20	79896	61	19	79894	207	13	79895	296
N1:80069	chr01	79996	80142	+3:YAL034W-A;	5.01328	6	90.25	11.86	80067	466	22	80062	145	23	80069	92	17	80060	54	18	80064	77	19	80068	93	20	80062	149	20	80052	12	23	80059	16	20	80068	13	8	80063	21	20	80066	30	25	80067	142	14	80062	167
N1:80227	chr01	80154	80300	+4:YAL034W-A;	2.98619	3	96	2	80230	368	24							80230	67	31	80228	54	29	80222	55	24	80232	63	33				80207	2	11	80253	3	18				80239	20	29	80232	51	24	80228	36
N1:80387	chr01	80314	80460	+5:YAL034W-A;	3.83555	5	100	15.437	80392	449	30	80351	116	31	80351	91	35	80396	52	38	80391	71	41	80395	62	37	80393	109	35	80341	8	20	80391	10	33	80405	18	20	80397	6	28	80398	43	36	80398	29	26
N1:80539	chr01	80466	80612	+9*:YAL034C; +6*:YAL034W-A;	5.51133	6	99.5	7.941	80546	378	28	80538	99	34	80546	62	35	80548	59	30	80546	57	34	80545	54	35	80546	87	28	80556	15	26	80541	6	16				80550	4	19	80554	18	33				80540	22
N1:80770	chr01	80697	80843	+8:YAL034C;	4.63989	6	89.25	14.428	80711	285	28	80703	76	36	80787	69	38	80785	49	27	80707	47	36	80789	57	33	80766	75	39	80764	8	40	80784	3	9	80803	5	9	80779	2	13	80744	13	29	80740	27	33	80729	10
N1:80954	chr01	80881	81027	+7:YAL034C;	4.44487	6	94.5	14.895	80958	515	35	80960	113	30	80952	73	36	80963	66	36	80967	112	37	80985	87	31	80946	91	23	80952	36	19	80940	12	41	80980	11	21				80953	13	35	80970	34	23	80949	36
N1:81178	chr01	81105	81251	+6:YAL034C;	3.13666	5	100	19.629							81183	117	33	81182	66	26	81186	93	24							81136	12	31				81202	5	22	81167	10	25	81184	24	30
N1:81365	chr01	81292	81438	+5:YAL034C;	4.85119	6	94.75	13.644	81319	646	32										81363	107	28	81303	81	35	81315	135	30	81369	68	28				81370	14	29	81376	11	34	81375	21	40	81306	70	26	81303	101
N1:81519	chr01	81446	81592	+4:YAL034C;	2.91166	4	75.5	27.343	81488	457	29				81485	81	29	81501	46	31							81493	81	25																81486	101	27
N1:81675	chr01	81602	81748	+3:YAL034C;	2.00042	4	100	37.268	81646	400	29	81608	136	26	81646	82	34				81610	108	35	81611	98	27	81643	122	28	81607	56	21	81608	11	24	81612	13	24	81612	10	29	81608	58	23	81645	129	29	81607	225
N1:81846	chr01	81773	81919	+2:YAL034C;	2.32951	4	67	21.731	81806	327	34													81782	43	20	81812	93	38				81815	12	33				81810	9	36				81810	80	26	81781	141
N1:81998	chr01	81925	82071	+1:YAL034C;	3.93797	5	100	15.678	81986	414	24	81982	68	31	81997	47	32	81985	42	31	82014	62	25	81977	41	34	81979	167	28	81971	68	35	81976	37	24	81969	14	35	81984	9	27	81973	88	31	81982	128	23	81977	289
N1:82224	chr01	82151	82297	-1:YAL034C;	3.36347	4	100	12.124	82235	260	28	82245	78	24	82233	54	28	82236	35	29	82230	45	28	82241	44	22	82235	202	22	82238	186	18	82238	55	15	82233	32	26	82243	11	13	82238	324	24	82231	99	19	82233	314
N1:82531	chr01	82458	82604	-1:YAL033W;	3.89908	6	99.75	18.606	82540	318	22	82565	182	27	82520	71	24	82527	33	23	82522	93	26	82555	57	27	82533	283	21	82538	80	28	82519	54	22	82514	32	27	82512	13	26	82529	108	27	82537	178	21	82553	292
N1:82760	chr01	82687	82833	+1:YAL033W;	4.71872	6	86.5	14.247	82750	334	25	82743	101	31	82755	56	24	82757	40	21	82749	34	30	82752	58	28	82750	287	22	82757	58	21	82755	36	15	82756	23	17	82757	11	22	82756	124	20	82752	98	18	82748	260
N1:82921	chr01	82848	82994	+2:YAL033W;	4.93667	5	78	3.033	82915	372	20	82910	109	26	82918	77	22	82922	45	28	82915	83	22	82917	51	23	82915	298	20	82909	43	26	82915	30	18				82919	23	22	82921	142	24	82916	173	16	82914	297
N1:83079	chr01	83006	83152	+3:YAL033W;	4.99556	6	100	12.254	83081	470	23	83061	206	26	83080	90	23	83082	79	23	83081	91	27	83087	77	27	83081	275	22	83078	25	23	83085	37	17	83048	31	28	83087	22	21	83083	140	24	83082	98	20	83080	149
N1:83237	chr01	83164	83310	+4*:YAL033W;	2.17552	4	27	28.826				83208	33	34							83247	13	42										83235	3	16	83248	7	18				83256	15	41
N1:83396	chr01	83323	83469	+7*:YAL032C;	3.4581	5	100	22.494	83388	415	30	83389	218	32	83392	84	36	83393	60	35	83427	85	30	83392	62	29	83389	159	29	83388	72	26	83389	31	30	83402	20	36	83427	11	28	83431	116	33	83394	46	27	83388	42
N1:83610	chr01	83537	83683	+6:YAL032C;	4.37997	5	95	10.04	83607	367	29	83602	144	31	83609	83	31	83605	62	32	83609	105	31	83607	68	36	83605	185	27	83614	50	33	83613	36	20	83621	27	30	83602	25	20	83605	138	27	83609	49	32	83604	64
N1:83781	chr01	83708	83854	+5:YAL032C;	3.7261	5	83.33	16.239	83774	305	31	83775	112	28	83779	94	33	83784	45	24	83767	75	35	83778	60	28	83774	140	30	83793	41	34	83779	22	33				83777	11	10	83773	52	32	83772	85	25	83774	59
N1:83953	chr01	83880	84026	+4:YAL032C;	5.65337	6	100	6.494	83948	401	25	83962	140	32	83956	94	29	83954	60	28	83956	89	30	83956	84	30	83961	158	28				83961	21	22	83962	19	30	83965	18	26	83948	58	26	83955	103	24
N1:84109	chr01	84036	84182	+3:YAL032C;	2.87731	3	100	6.028	84103	264	27				84113	73	25	84110	34	24				84109	56	23				84078	31	34	84124	17	28	84122	14	13	84124	11	20	84106	100	24	84108	120	24	84099	164
N1:84277	chr01	84204	84350	+2:YAL032C;	5.30206	6	100	10.834	84274	522	22	84269	176	21	84268	117	24	84278	59	22	84279	110	18	84272	90	21	84273	176	20	84282	37	23	84278	24	22	84288	7	26				84264	64	26	84274	247	17	84272	350
N1:84457	chr01	84384	84530	+1:YAL032C;	5.14552	6	100	12.517	84456	397	25	84459	126	24	84453	71	29	84458	59	29	84457	65	27	84456	76	22	84461	261	16	84459	123	21	84457	42	24	84461	25	28	84455	37	21	84455	163	18	84461	293	16	84461	458
N1:84702	chr01	84629	84775	+15*:YAL031C; -1:YAL032C;	2.50317	3	67	13	84708	146	24	84712	42	26	84711	17	26	84712	21	34	84718	29	28				84713	34	21	84713	3	10	84739	5	20	84725	3	30							84712	4	28	84703	8
N1:84872	chr01	84799	84945	+14:YAL031C;	4.56674	6	83.5	18.53	84875	386	23	84863	138	24	84887	80	31	84885	80	30	84877	78	21	84859	83	24	84879	68	27	84865	9	11	84890	12	23	84883	13	34	84902	5	19	84859	29	21	84883	13	18	84865	15
N1:85048	chr01	84975	85121	+13:YAL031C;	5.73791	6	100	5.636	85053	613	26	85032	146	29	85052	123	28	85050	73	28	85053	111	24	85038	87	28	85049	127	30	85028	28	20	85057	24	23	85067	15	21	85058	10	28	85012	43	29	85061	14	15	85035	8
N1:85216	chr01	85143	85289	+12:YAL031C;	4.76154	6	83.5	15.255	85230	581	30				85241	129	36	85239	87	30	85219	93	27	85228	85	32	85220	94	34				85247	10	36	85243	6	17	85250	3	47	85221	24	36	85233	24	20	85212	9
N1:85410	chr01	85337	85483	+11:YAL031C;	3.64053	6	87.5	41.759	85396	412	38	85350	152	30	85410	83	33	85410	46	37	85396	64	35	85405	65	44	85410	77	36				85409	13	36	85399	5	20	85416	4	24	85388	23	42	85401	8	24	85433	2
N1:85591	chr01	85518	85664	+10:YAL031C;	4.64853	5	82.33	7.328	85578	496	27	85579	83	32	85582	115	28	85584	98	21	85576	98	27	85589	71	30	85577	77	23	85559	20	18	85569	19	12	85580	23	15	85573	14	17	85595	19	27	85571	19	16	85588	10
N1:85887	chr01	85814	85960	+8:YAL031C;	3.14693	6	86.5	23.149	85891	423	25	85871	153	34	85900	73	32	85905	48	27	85883	90	28	85914	58	39	85921	30	37	85904	9	26	85887	6	35	85901	7	39	85895	2	1	85882	3	22				85861	8
N1:86064	chr01	85991	86137	+7:YAL031C;	2.72253	3	100	9.292	86065	552	24	86053	151	31	86070	110	29	86072	77	26	86069	106	23	86069	101	25	86072	58	23	86057	26	19	86070	18	18	86075	13	29	86052	11	18	86063	17	30	86057	19	19	86074	12
N1:86217	chr01	86144	86290	+6:YAL031C;	5.58535	6	94.5	7.183				86203	93	32																									86220	3	22	86225	13	28	86214	23	24
N1:86375	chr01	86302	86448	+5:YAL031C;	5.57166	6	89.25	7.23	86370	450	22	86356	168	26	86373	72	23	86370	67	24	86367	91	22	86371	81	22	86373	64	28	86367	11	19	86370	7	41	86343	3	34	86374	9	20	86373	15	25	86371	53	17	86367	38
N1:86527	chr01	86454	86600	+4:YAL031C;	5.14364	6	85.5	10.704	86527	730	19	86526	166	25	86528	78	28	86535	66	21	86537	61	21	86533	67	26	86533	110	19	86522	19	19	86528	7	10	86535	8	11				86536	13	14	86529	108	17	86532	129
N1:86695	chr01	86622	86768	+3:YAL031C;	5.82647	6	100	4.506	86689	713	21	86693	196	23	86690	84	22	86695	96	21	86697	116	19	86694	95	28	86689	216	20	86699	28	16	86692	26	21	86696	11	14	86684	14	16	86691	56	15	86692	360	14	86694	371
N1:86859	chr01	86786	86932	+2:YAL031C;	4.8672	6	100	12.802	86877	264	24	86845	96	29				86879	56	26										86855	13	15	86881	8	26							86853	39	21				86878	169
N1:87031	chr01	86958	87104	+1:YAL031C; -1:YAL030W;	5.45115	6	96	8.595	87030	434	20	87024	105	19	87027	84	19	87028	78	20	87021	74	19	87027	75	19	87031	332	19	87030	70	17	87032	56	14	87031	21	25	87023	23	13	87031	145	16	87032	180	17	87032	337
N1:87312	chr01	87239	87385	-1:YAL031C; +1*:YAL030W;	5.71783	6	100	5.955	87315	434	20	87312	162	25	87316	103	22	87315	63	14	87318	119	25	87316	89	20	87314	215	20	87312	61	17	87315	56	15	87311	42	19	87316	25	19	87313	297	19	87313	248	15	87313	361
N1:87472	chr01	87399	87545		3.50566	4	50	10.436	87469	311	25	87461	146	23				87469	55	22							87463	80	27	87512	13	30	87473	13	18	87467	11	22	87473	2	15	87464	34	30	87463	61	21	87465	143
N1:87641	chr01	87568	87714		5.31329	6	100	9.368	87643	356	26	87630	133	27	87624	67	26	87638	46	27	87629	101	27	87628	67	25	87630	154	27				87651	14	27	87657	13	25	87653	14	14	87650	110	27	87641	98	25	87624	186
N1:87861	chr01	87788	87934	+29*:YAL029C;	1.03509	4	93	59.556										87789	12	27	87792	14	30	87796	9	17	87788	32	23	87795	3	1													87796	5	0
N1:88012	chr01	87939	88085	+28:YAL029C;	3.04097	6	100	34.525	88012	422	38	87948	132	28	87952	70	35	87958	79	36	87954	80	34	87956	51	30	88012	92	35	87972	8	32	87944	11	35	87989	14	37	87980	4	11	87993	216	26	88014	26	33	87939	20
N1:88246	chr01	88173	88319	+27:YAL029C;	2.98457	5	93	40.998																88312	93	29				88261	11	26				88250	13	41	88306	6	21	88179	88	39	88234	9	40	88275	8
N1:88520	chr01	88447	88593	+25:YAL029C;	5.30911	6	75.25	10.053	88514	322	41	88509	64	36	88517	50	37	88516	47	35	88502	61	30	88515	41	36	88512	39	43	88466	7	31	88518	8	30	88456	5	24				88459	26	34	88480	9	18	88458	3
N1:88686	chr01	88613	88759	+24:YAL029C;	3.61933	5	100	17.768	88738	616	38	88730	195	36	88733	83	37	88669	106	42	88731	102	38	88732	90	40	88736	82	30	88726	12	32	88734	12	42	88666	8	29	88652	6	42
N1:88849	chr01	88776	88922	+23:YAL029C;	2.14802	3	67	19.502										88820	94	34										88895	11	27	88884	6	20				88831	3	34				88812	12	38	88828	10
N1:89028	chr01	88955	89101	+22:YAL029C;	3.34971	6	91.25	31.911	88973	413	38	88977	128	39	88973	63	40	89059	89	39	88973	75	39	88975	70	29	88970	41	29	89085	6	26	89050	10	47	88970	8	24	89022	4	28							88979	4
N1:89179	chr01	89106	89252	+21:YAL029C;	1.01218	3	76	57.558													89127	93	43										89213	5	29				89177	7	13	89148	19	35	89171	8	29
N1:89336	chr01	89263	89409	+20:YAL029C;	2.95817	4	56	16.721	89280	566	38	89296	156	35	89285	115	45	89282	91	42	89286	123	39	89280	106	41	89294	46	42	89276	5	32	89406	2	0	89298	12	28	89341	6	28				89348	3	29	89288	3
N1:89511	chr01	89438	89584	+19:YAL029C;	2.42144	5	89	34.953	89561	531	31	89545	213	34	89569	99	31	89545	94	35	89560	87	37	89540	65	36	89554	39	29	89526	9	30				89530	13	26	89569	7	24	89522	28	37				89540	5
N1:89671	chr01	89598	89744	+18:YAL029C;	1.94535	2	-1	5.657																						89678	6	23				89680	7	39
N1:89840	chr01	89767	89913	+17:YAL029C;	2.59335	4	100	25.395	89910	457	42	89845	150	33	89852	92	38	89856	89	36				89851	88	39	89785	58	39	89900	12	39	89770	4	13	89848	6	36	89839	4	36	89853	19	27	89852	9	41	89860	2
N1:90020	chr01	89947	90093	+16:YAL029C;	2.86588	6	84.75	27.609	90062	593	31	90058	193	31	90016	76	35	90013	76	40	90055	122	31	90055	112	30	90009	27	37	90068	10	45	90001	6	27	90020	21	31				90031	15	20	90058	6	20	90015	5
N1:90210	chr01	90137	90283	+15:YAL029C;	3.41234	6	79.75	22.781	90212	368	28	90212	128	32	90210	87	36	90209	71	33	90206	108	32	90205	84	26	90180	21	35				90228	3	28	90225	10	22	90184	9	20	90194	20	18				90196	2
N1:90386	chr01	90313	90459	+14:YAL029C;	3.06535	5	89	30.859																									90400	9	33				90407	8	32				90368	9	21
N1:90601	chr01	90528	90674	+13:YAL029C;	2.24548	4	83.5	35.024													90633	53	39	90654	38	32				90578	10	36	90549	2	26	90645	4	15				90662	13	42	90576	4	19
N1:90867	chr01	90794	90940	+11:YAL029C;	3.50022	4	100	10.844	90872	493	37	90873	157	38	90813	79	36	90823	83	30	90815	103	30	90817	86	31	90804	29	38				90816	7	44	90866	6	24				90817	19	28	90797	11	35	90883	3
N1:91042	chr01	90969	91115	+10:YAL029C;	2.68816	4	77	21.515				91061	135	41	90999	71	31	90995	80	36	90994	78	38	90992	73	30	90997	28	39										90971	9	19	90988	14	27				91066	2
N1:91327	chr01	91254	91400	+8:YAL029C;	4.05357	6	84.75	29.203	91319	547	33				91320	85	33	91309	72	28	91310	118	29	91315	74	29	91319	39	30													91307	26	27	91338	20	22	91270	11
N1:91496	chr01	91423	91569	+7:YAL029C;	3.5294	4	61	10.408	91480	434	35	91565	90	32	91479	79	40	91479	78	30	91485	84	30	91467	71	31	91488	25	38	91429	10	26	91483	11	32				91472	10	31	91476	17	29	91490	17	32	91477	15
N1:91656	chr01	91583	91729	+6:YAL029C;	3.72232	5	77	22.709	91654	503	26				91656	100	27	91649	60	31	91650	103	25				91659	36	23	91621	8	17	91655	7	5	91663	13	34							91658	47	22
N1:91808	chr01	91735	91881	+5:YAL029C;	4.46713	5	100	9.397	91812	484	31				91811	91	32	91812	55	30	91811	115	31	91794	90	22	91814	60	37	91811	6	38	91803	11	22	91814	8	31	91799	21	34	91789	108	22	91807	88	30	91763	68
N1:91964	chr01	91891	92037	+4:YAL029C;	4.31096	5	77.67	11.367	91961	276	35				91963	53	33	91964	47	30	91963	55	22	91960	61	27										92035	9	33	91958	4	9	91966	23	29	91962	69	31
N1:92120	chr01	92047	92193	+3:YAL029C;	2.86929	3	100	6.245				92068	89	29				92144	55	35	92145	63	37	92139	76	33	92068	35	36	92068	8	15	92074	3	32				92142	7	44	92114	24	28	92139	126	30	92081	133
N1:92271	chr01	92198	92344	+2:YAL029C;	3.80985	5	83.67	23.114	92278	317	27	92262	98	32	92279	55	34										92272	72	32	92268	22	32	92280	9	33	92263	11	40							92286	56	26	92273	137
N1:92452	chr01	92379	92525	+1:YAL029C;	4.38888	6	71	16.606	92447	239	20	92445	126	21	92445	61	19	92454	63	17	92455	69	20	92451	57	21	92446	191	17	92445	15	18	92438	7	11	92473	2	26	92412	3	28	92463	10	21	92444	89	19	92445	207
N1:92727	chr01	92654	92800	-1:YAL029C; 0:YAL028W;	2.17643	3	67	17.502	92661	1	0																92719	2	14							92659	1	0
N1:92899	chr01	92826	92972	+1:YAL028W;	5.62508	6	100	7.007	92900	1171	14	92903	307	16	92904	213	17	92904	184	15	92903	178	17	92915	167	18	92902	305	15	92909	89	16	92899	30	14	92901	22	23	92902	23	11	92907	77	23	92905	250	14	92899	923
N1:93071	chr01	92998	93144	+2:YAL028W;	5.62958	6	90.75	6.735	93070	450	20	93070	166	20	93079	105	29	93072	59	24	93071	104	23	93081	90	16	93071	103	21	93076	16	17	93073	12	24	93056	11	23	93075	6	10	93090	77	20	93068	124	16	93076	357
N1:93242	chr01	93169	93315	+3:YAL028W;	4.34735	5	100	10.644	93239	609	19	93245	170	24	93236	127	23	93241	81	21	93243	117	19	93246	97	22	93238	188	20	93245	24	22	93245	17	16	93248	17	27	93245	17	19	93250	49	30	93239	177	18	93243	243
N1:93406	chr01	93333	93479	+4:YAL028W;	4.50338	5	90	8.961	93415	632	28	93420	214	24	93412	126	28	93414	54	22	93412	118	33	93412	82	31	93414	200	32	93431	24	22	93406	10	23	93414	23	28	93416	11	27	93412	41	30	93410	102	22	93420	104
N1:93593	chr01	93520	93666	+5:YAL028W;	2.47499	4	86	24.739	93577	390	31	93597	193	29	93568	80	34	93593	48	32	93589	99	22	93590	81	35	93588	180	28	93590	14	18	93571	9	19	93580	18	25							93579	39	27	93589	49
N1:93745	chr01	93672	93818	+6:YAL028W;	2.96355	4	94.5	20.207	93749	471	30	93754	123	25				93750	49	31	93751	82	31	93747	69	29	93749	158	35	93800	9	28	93747	12	30				93752	11	15	93742	44	38	93747	32	31	93751	32
N1:93906	chr01	93833	93979	+7:YAL028W; 0:anti003;	1.86985	6	100	42.571	93909	665	34	93941	151	36	93896	123	34	93899	77	32	93902	86	36	93897	95	31	93923	270	41	93949	16	31	93950	20	41	93933	18	24	93969	9	31				93897	43	35	93925	40
N1:94153	chr01	94080	94226	+8:YAL028W; -1:anti003;	2.91175	6	94.75	33.108	94092	505	35	94158	144	35	94089	77	38	94161	68	40	94090	79	33	94156	66	38	94095	200	34	94101	18	30	94200	10	30				94162	4	17	94162	15	29	94159	26	31	94091	28
N1:94440	chr01	94367	94513	-1:YAL027W; +10:YAL028W;	3.83576	5	69	26.31				94421	49	35	94415	30	34	94410	32	38	94418	28	36							94484	14	29	94401	4	29	94452	5	45	94411	8	27	94481	7	25	94417	13	34	94447	18
N1:94661	chr01	94588	94734	+1:YAL027W; +11*:YAL028W;	5.0036	6	86	14.4	94649	325	33	94642	172	29	94632	66	27	94662	61	28	94632	61	32	94656	76	25	94653	267	31	94654	51	27	94663	12	23	94636	32	20	94636	6	26	94666	155	23	94652	122	27	94633	351
N1:94823	chr01	94750	94896	+2:YAL027W;	2.87619	4	67	33.866	94823	224	27	94822	72	23	94824	39	28	94829	38	28	94826	33	25	94822	31	28	94820	85	30	94822	13	19	94821	10	10	94819	8	23	94813	11	30	94838	32	26	94817	62	27	94830	72
N1:95008	chr01	94935	95081	+3:YAL027W;	3.18235	5	100	21.559	95021	294	35							95016	69	32	95019	64	36	95019	64	30	95020	208	33	94975	17	20	95015	20	33	95031	17	30	95057	13	23	95013	146	32	95017	124	28	95015	138
N1:95183	chr01	95110	95256	+4:YAL027W;	3.70409	5	100	24.276	95180	345	33	95143	130	36	95146	78	33	95174	67	25	95182	55	32	95170	58	29				95155	23	24				95208	7	26	95208	11	41				95188	38	36
N1:95489	chr01	95416	95562	+6*:YAL027W;	3.34249	5	85.75	26.621	95487	130	31	95474	68	33							95489	20	34	95484	19	30	95486	23	30	95487	4	37				95478	5	7	95469	6	31	95483	16	23	95472	8	28	95488	7
N1:95722	chr01	95649	95795	+25:YAL026C;	5.50736	6	89	8.27	95678	384	31	95674	136	32	95679	79	29	95676	101	27	95677	60	28	95675	74	26	95680	90	26	95721	14	26	95669	8	28	95751	10	20	95730	8	34				95678	10	27	95676	9
N1:95900	chr01	95827	95973	+24:YAL026C;	3.99364	5	100	17.584	95903	491	40	95964	148	33	95897	88	36	95901	83	39	95907	118	36	95859	85	39	95862	71	35	95874	6	34	95903	6	41	95909	14	37				95846	35	31	95865	5	22	95914	6
N1:96088	chr01	96015	96161	+23:YAL026C;	3.99543	5	99	13.046	96082	518	33	96139	163	43	96076	101	37	96085	82	38	96095	96	36	96084	80	33	96081	69	43	96097	13	23	96136	6	31	96059	8	30	96045	6	23	96054	5	42				96113	5
N1:96278	chr01	96205	96351	+22:YAL026C;	4.30954	6	97.75	17.198	96295	442	36	96301	129	33	96341	88	42	96294	78	41	96293	85	36	96289	75	37	96281	54	41							96208	7	35	96253	1	0	96254	23	37				96290	1
N1:96554	chr01	96481	96627	+20:YAL026C;	3.85999	5	100	14.731																									96535	9	35				96562	6	47	96543	16	25	96522	8	32	96606	3
N1:96845	chr01	96772	96918	+18:YAL026C;	3.16374	5	100	21.3	96818	591	30	96843	185	32	96818	109	32	96840	92	32	96835	86	34	96843	95	33	96815	68	30	96843	16	33				96845	4	3				96853	26	30	96813	9	25	96894	7
N1:96998	chr01	96925	97071	+17:YAL026C;	3.02508	6	100	32.536	96995	505	33							96987	78	37				97040	114	36	97007	76	39	97000	17	29	96948	9	30				96994	6	21	97043	24	32	96973	6	30
N1:97202	chr01	97129	97275	+16:YAL026C;	2.75786	5	87	30.725	97148	543	41	97158	174	37	97137	108	39	97180	92	38	97158	131	36	97216	107	43				97161	15	25	97208	11	43				97157	5	14							97141	5
N1:97378	chr01	97305	97451	+15:YAL026C;	2.83964	5	70.67	36.794	97307	414	43													97382	113	41	97308	71	44										97414	5	12
N1:97531	chr01	97458	97604	+14:YAL026C;	1.96476	5	90.25	48.107	97463	817	36	97460	216	41				97465	110	30				97533	96	37	97467	97	31	97468	21	26	97479	16	33	97477	12	25	97567	6	36	97471	19	38	97480	11	30
N1:97687	chr01	97614	97760	+13:YAL026C;	3.98471	5	78	31.005	97631	654	38	97708	211	40				97651	130	37				97705	115	37	97683	75	40				97626	5	7	97702	10	35										97704	7
N1:98096	chr01	98023	98169	+11:YAL026C;	4.95271	6	76.5	12.437	98110	482	23				98109	100	23	98111	81	31	98109	84	33	98109	54	18	98108	57	25	98121	4	11				98055	11	41	98096	5	29	98072	5	38	98118	14	14	98109	6
N1:98427	chr01	98354	98500	+9:YAL026C;	2.72845	6	99.25	31.833	98435	477	31	98466	145	41	98438	85	28	98446	87	30	98450	87	35	98446	95	27	98439	42	25	98471	14	28	98446	10	16	98443	6	17	98435	2	4							98443	5
N1:98763	chr01	98690	98836	+7:YAL026C;	3.65614	5	76	23.902	98758	416	26	98745	124	29	98755	103	27	98759	60	27	98759	80	17	98755	80	23	98758	51	24	98752	6	25	98766	5	23	98743	7	12	98777	2	4	98751	21	28	98761	13	13	98758	9
N1:98939	chr01	98866	99012	+6:YAL026C;	3.92167	4	100	3.916	98942	551	29	98945	152	44	98939	104	23	98942	83	30	98940	103	30	98941	67	25	98937	50	23	98935	17	21	98949	5	27	98932	12	15	98925	8	11	98930	12	26
N1:99217	chr01	99144	99290	+4:YAL026C;	4.59195	5	67	8.093	99236	230	33	99224	75	30				99232	50	30	99218	40	32	99233	34	32	99190	59	37	99149	7	39	99228	3	29	99153	10	33				99243	9	24	99229	36	30	99253	29
N1:99404	chr01	99331	99477	+3:YAL026C;	5.40943	6	100	8.618	99410	413	24	99402	181	21	99414	109	23	99411	70	23	99408	93	23	99410	113	22	99409	149	24	99411	19	23	99410	8	13	99404	23	21	99401	19	15	99407	48	23	99412	207	19	99412	206
N1:99566	chr01	99493	99639	+2:YAL026C;	5.19828	6	94.5	10.173	99576	329	23	99571	98	26	99578	86	31	99577	62	24	99575	70	28	99582	49	29	99573	100	24				99571	14	14	99577	7	20				99579	42	22	99574	171	19	99573	182
N1:99738	chr01	99665	99811	+1:YAL026C;	4.44075	5	100	9.711	99735	190	22	99724	61	24	99731	49	24	99733	39	19	99727	44	27	99731	37	17	99731	99	17	99715	15	11	99736	21	13	99725	21	14	99723	41	16	99736	58	19	99733	97	19	99731	213
N1:99996	chr01	99923	100069	-1:YAL026C; +8*:YAL025C;	2.4863	3	79	13.115	99983	71	34	99982	41	27	99987	19	22	99984	30	20	99981	28	16	99986	18	24	99973	10	33	99968	3	28							99983	4	15	99927	7	31	100027	4	21	99983	5
N1:100159	chr01	100086	100232	+7:YAL025C;	3.28757	6	95.25	25.257	100161	252	26	100160	90	22	100159	54	24	100156	42	25	100155	45	22	100165	42	21	100162	27	28	100185	4	21	100149	3	6
N1:100335	chr01	100262	100408	+6:YAL025C;	2.47089	4	68.5	20.156	100350	365	36	100315	141	30	100317	95	29	100306	74	21	100321	99	26	100317	62	33	100319	53	36				100309	7	22	100317	6	5	100305	5	30	100309	40	28	100325	47	30	100321	27
N1:100502	chr01	100429	100575	+5:YAL025C;	4.88054	6	80.25	12.449	100500	268	29	100484	135	35	100485	72	29	100483	48	33	100488	59	28	100490	46	29	100498	32	34	100487	12	36	100494	5	26	100480	16	10	100486	11	14	100486	56	21	100496	58	23	100483	22
N1:100659	chr01	100586	100732	+4:YAL025C;	4.05995	5	73.67	12.661	100654	386	24	100649	197	23	100653	100	22	100650	111	18	100651	74	17	100652	80	17	100651	72	23				100657	4	4	100641	11	14	100668	7	24	100650	31	23	100654	119	17	100653	101
N1:100813	chr01	100740	100886	+3:YAL025C;	5.42617	6	100	8.781	100814	501	21	100816	189	22	100820	104	20	100818	86	19	100821	120	21	100815	99	22	100816	82	19	100807	9	14	100817	12	10	100819	7	9				100816	51	22	100816	170	16	100815	205
N1:100972	chr01	100899	101045	+2:YAL025C;	5.83745	6	100	4.401	100976	733	15	100980	287	15	100977	170	16	100978	117	16	100980	193	17	100976	173	12	100975	217	14	100973	12	11	100975	11	7	100977	7	8	100968	3	13	100974	41	15	100976	549	12	100978	728
N1:101137	chr01	101064	101210	+1:YAL025C;	5.66483	6	100	6.356	101151	629	16	101151	302	16	101148	173	16	101149	128	12	101149	151	16	101149	164	14	101150	311	16	101129	29	25	101151	12	9	101146	9	15	101155	6	10	101144	30	27	101151	252	13	101150	382
N1:101285	chr01	101212	101358	0:YAL025C;	1.00158	2	100	43.134				101345	18	22	101342	8	5													101345	20	14	101344	5	1	101345	4	2	101338	1	0	101347	3	26	101345	5	3	101345	6
N1:101434	chr01	101361	101507	+28*:YAL024C; -1:YAL025C;	2.116	3	61	18.771	101441	85	25							101462	14	23	101442	16	24	101438	18	29	101428	20	28
N1:101608	chr01	101535	101681	+27:YAL024C;	5.58738	6	94.75	7.232	101621	336	26	101588	107	24	101615	65	18	101610	49	22	101609	52	23	101613	46	23	101626	61	24	101610	7	26				101601	3	29	101609	1	0	101609	28	19	101614	11	11	101640	8
N1:101784	chr01	101711	101857	+26:YAL024C;	4.36596	6	100	18.177	101794	537	24	101768	183	29	101799	113	29	101779	66	29	101786	108	25	101778	98	25	101784	70	29	101761	9	23	101801	14	18	101773	7	16	101798	6	19	101796	22	23	101814	12	21
N1:101953	chr01	101880	102026	+25:YAL024C;	4.65364	6	100	14.798	101954	672	28	101935	199	28	101958	90	28	101953	125	24	101949	116	20	101954	135	24	101964	89	26	101972	14	33	101961	10	36	101954	8	13				101955	21	22	101965	7	13	101949	6
N1:102124	chr01	102051	102197	+24:YAL024C;	2.53763	5	81.67	28.988	102122	488	36	102109	135	40	102133	80	38	102123	70	31	102154	84	39	102117	70	30	102112	33	40				102156	6	35	102169	3	25	102107	1	0				102135	6	21
N1:102322	chr01	102249	102395	+23:YAL024C;	3.23623	4	89	13.832							102325	148	32	102323	139	31							102328	55	31				102330	10	20	102327	16	29	102323	10	36				102343	13	38
N1:102480	chr01	102407	102553	+22:YAL024C;	1.05881	4	100	30.956	102414	475	31	102415	149	29							102416	106	29	102414	78	30																102413	23	30				102428	7
N1:102647	chr01	102574	102720	+21:YAL024C;	3.56359	6	93.5	31.236	102666	683	32	102665	184	35	102669	93	36	102668	100	34	102668	140	31	102596	104	33	102671	38	32				102661	7	31	102596	4	4	102623	1	0	102613	14	30	102664	6	22	102595	5
N1:102829	chr01	102756	102902	+20:YAL024C;	4.26978	6	100	19.565	102839	502	37	102849	181	35	102843	106	42	102850	102	35	102835	111	36	102757	45	48	102842	32	29				102834	2	4				102837	2	15	102841	26	40	102899	11	23
N1:103003	chr01	102930	103076	+19:YAL024C;	2.86148	4	89	26.725	103008	312	41				103050	37	47	103005	53	43				102948	65	32	103058	20	39	102990	4	25
N1:103162	chr01	103089	103235	+18:YAL024C;	2.24054	5	100	40.691	103158	536	39	103159	101	39	103208	97	39	103211	55	35	103212	79	35	103213	90	41	103216	36	29	103178	10	23	103128	4	3	103157	7	26	103176	1	0	103203	19	28	103192	10	18	103155	6
N1:103511	chr01	103438	103584	+16:YAL024C;	2.42545	5	100	29.074	103515	426	33	103505	134	39	103579	87	40	103519	72	33	103507	101	32	103509	74	34	103480	30	36	103506	5	12	103468	3	21	103506	8	9	103522	4	18	103512	24	31	103518	6	21	103560	3
N1:103695	chr01	103622	103768	+15:YAL024C;	1.00449	2	-1	64.166	103681	334	37							103683	60	35	103690	55	39	103693	65	27				103759	9	41							103696	3	5	103690	5	30
N1:103898	chr01	103825	103971	+14:YAL024C;	2.17185	5	100	38.501	103839	767	34	103896	175	35	103877	119	34							103862	107	31	103847	49	36	103929	19	27										103871	18	35
N1:104166	chr01	104093	104239	+12:YAL024C;	2.98637	6	91.75	41.569	104145	723	34	104100	124	34	104118	99	39	104158	119	38				104169	102	41	104141	51	30				104159	9	25	104126	4	10				104171	25	36
N1:104316	chr01	104243	104389	+11:YAL024C;	3.78838	4	83.5	6.481	104310	658	32	104254	194	35	104267	140	42				104308	94	35	104319	69	35	104309	41	32	104266	17	39				104312	4	22	104265	4	25				104303	9	26	104271	7
N1:104482	chr01	104409	104555	+10:YAL024C;	4.44363	6	100	18.63	104476	908	21	104477	154	37	104483	151	23	104483	131	25	104482	131	26	104485	120	25	104478	50	25	104484	11	13	104516	6	28	104486	5	15	104484	8	10	104480	11	23	104476	20	8	104472	9
N1:104632	chr01	104559	104705	+9:YAL024C;	3.32124	4	91	12.57							104649	69	39	104646	73	36	104649	49	34	104649	48	36																104649	5	25
N1:104800	chr01	104727	104873	+8:YAL024C;	4.43784	6	89	28.437	104794	523	25	104787	174	37	104808	98	33	104803	85	25	104797	115	21	104801	90	22	104792	39	25	104804	10	18	104801	1	0	104768	3	22	104804	4	32	104807	9	28	104789	20	19	104786	2
N1:104967	chr01	104894	105040	+7:YAL024C;	4.76416	6	99	28.358							104970	90	32																104987	5	28	104968	2	0	104952	2	16	104970	31	28
N1:105116	chr01	105043	105189	+6:YAL024C;	4.63824	5	100	7.463	105111	444	26	105101	184	26				105113	73	25	105108	87	23	105114	60	24	105113	36	25	105111	7	19				105130	8	34	105102	7	29				105108	41	16	105094	13
N1:105276	chr01	105203	105349	+5:YAL024C;	5.45053	6	99.5	8.329	105281	425	21	105271	120	25	105286	68	21	105285	38	20	105283	78	21				105285	43	21							105284	14	8	105296	3	8	105270	12	28	105278	59	17	105272	14
N1:105434	chr01	105361	105507	+4:YAL024C;	5.36745	6	88.25	8.892	105437	337	21	105423	111	21	105441	60	21	105440	73	19	105438	57	18	105432	67	24	105434	33	29	105432	7	26	105443	3	11	105439	6	6	105444	6	19	105426	10	28	105441	51	19	105430	41
N1:105596	chr01	105523	105669	+3:YAL024C;	5.55028	6	100	7.521	105603	465	20	105596	196	25	105608	103	21	105608	68	20	105610	105	20	105603	84	17	105605	51	20	105606	2	15	105606	6	11				105611	5	9	105605	38	17	105604	115	18	105603	124
N1:105768	chr01	105695	105841	+2:YAL024C;	4.77735	6	98	13.292	105764	320	21	105760	87	25	105761	58	26	105766	42	21	105767	75	27	105756	54	21	105756	36	23	105757	10	21				105744	6	10	105769	4	17	105761	26	26	105766	84	18	105755	145
N1:105928	chr01	105855	106001	+1:YAL024C;	5.83122	6	100	4.472	105924	387	17	105923	150	17	105924	81	26	105924	67	17	105922	103	21	105921	52	18	105925	98	17	105926	14	14	105927	10	18	105925	11	10	105917	8	20	105932	30	19	105926	128	14	105923	204
N1:106165	chr01	106092	106238	-1:YAL024C; +16*:YAL023C;	3.78506	5	56.33	15.297	106178	80	29	106170	23	32	106186	22	22	106192	13	24	106182	18	31	106177	6	27	106173	10	38				106184	3	6				106144	1	0	106186	25	25	106157	4	9	106171	5
N1:106363	chr01	106290	106436	+15:YAL023C;	4.5966	5	100	8.019	106350	512	26	106353	229	29	106361	109	26	106359	106	27	106354	144	23	106358	118	23	106354	70	26	106361	13	24	106357	8	35	106363	15	16	106354	9	16	106354	57	29	106352	20	18	106353	22
N1:106542	chr01	106469	106615	+14:YAL023C;	4.81415	6	91.75	15.211	106530	463	36	106536	103	40	106539	101	27	106539	66	24	106531	72	28	106536	99	25	106551	60	29	106548	9	14	106510	5	10	106546	5	38	106531	9	24	106530	76	23	106500	8	36	106519	2
N1:106723	chr01	106650	106796	+13:YAL023C;	4.01451	5	100	15.764	106698	681	29	106734	177	34	106716	161	30	106725	120	25	106708	157	27	106701	139	25	106721	62	26				106686	2	4	106748	8	32	106720	9	20	106717	56	26	106686	25	31	106683	13
N1:106880	chr01	106807	106953	+12:YAL023C;	1.0282	2	100	32.527																106862	65	27				106841	5	41	106840	3	25
N1:107041	chr01	106968	107114	+11:YAL023C;	3.12452	6	76.5	32.354	107009	378	30	107018	107	31	107017	53	38	107025	54	37	107009	126	29	107014	75	26	107002	36	39	107051	2	32							107018	7	28	107009	33	34	106988	22	30	107108	5
N1:107362	chr01	107289	107435	+9:YAL023C;	2.64649	3	67	10.599	107298	642	34	107395	203	36	107374	104	38	107376	77	46	107311	121	37	107310	89	35	107306	66	42				107350	9	36							107317	23	29				107289	13
N1:107528	chr01	107455	107601	+8:YAL023C;	4.48673	6	78.75	16.789	107496	783	35	107552	211	28	107533	144	38	107533	140	34	107510	193	38	107522	165	35	107526	73	37	107595	11	33							107507	12	28	107491	30	35	107473	64	33	107574	41
N1:107829	chr01	107756	107902	+6:YAL023C;	3.07108	5	79	26.508										107819	72	33	107799	88	31										107846	4	28	107801	8	9	107786	5	12							107784	33
N1:108120	chr01	108047	108193	+4:YAL023C;	2.5516	5	73.33	40.54	108120	374	28	108116	77	36	108121	59	31	108120	49	27	108114	77	24	108121	74	18	108118	53	34				108109	6	22	108103	7	40	108146	7	26	108130	15	25	108119	97	21	108118	79
N1:108281	chr01	108208	108354	+3:YAL023C;	3.59771	5	75	30.028	108281	284	24	108279	79	36	108285	63	27	108286	39	21	108288	71	26	108287	56	25	108284	58	25	108267	10	26	108277	6	25	108270	2	11				108279	21	36	108282	79	21	108285	118
N1:108435	chr01	108362	108508	+2:YAL023C;	4.89539	5	83	3.912	108444	383	22				108452	75	23	108452	51	25				108455	93	21	108448	124	23	108449	27	31	108453	17	25				108440	12	20	108443	47	19	108443	157	18
N1:108602	chr01	108529	108675	+1:YAL023C;	5.85717	6	100	4.147	108601	774	17	108601	245	23	108602	157	22	108600	97	18	108600	146	20	108603	160	17	108599	646	16	108599	18	20	108602	69	12	108598	57	11	108600	44	11	108603	85	18	108599	383	14	108602	354
N1:108770	chr01	108697	108843	0:YAL023C;	1	1	-2	0																												108766	2	5
N1:108943	chr01	108870	109016	+10*:YAL022C; -1:YAL023C;	4.47986	6	85.25	25.877	108939	352	27	108923	121	28	108936	84	27	108942	52	28	108928	63	31	108932	83	25	108942	28	31	108885	3	5				108944	3	4	108926	5	7	108922	13	33	108942	7	23	108922	6
N1:109102	chr01	109029	109175	+9:YAL022C;	4.61678	6	65	16.813	109098	430	23	109086	139	23	109101	116	20	109090	63	22	109090	95	21	109093	100	21	109095	17	26	109086	5	9	109081	5	11	109099	6	14	109090	12	12	109091	21	29	109095	28	19	109089	7
N1:109271	chr01	109198	109344	+8:YAL022C;	4.0411	5	91	12.795	109270	559	24	109237	172	23	109273	140	27	109273	88	24	109269	93	28	109268	134	25	109273	46	28				109277	8	6	109264	8	23	109268	15	17	109264	32	17	109276	29	27	109259	7
N1:109443	chr01	109370	109516	+7:YAL022C;	4.07322	5	66.67	12.661	109440	274	34	109436	83	33	109440	82	33	109434	42	37	109442	57	26	109441	53	26	109441	30	31				109438	6	21				109438	10	28	109440	20	30	109443	15	39	109444	6
N1:109605	chr01	109532	109678	+6:YAL022C;	5.44658	6	83.5	8.472	109600	731	22	109587	111	29	109596	123	30	109602	51	28	109595	131	28	109597	90	26	109596	115	21	109609	11	27				109601	13	15	109589	18	21	109595	23	23	109600	34	20	109598	22
N1:109768	chr01	109695	109841	+5:YAL022C;	4.43096	5	100	10.114	109760	438	25				109763	98	25	109762	52	25	109759	105	28	109758	80	19	109764	102	21	109772	9	34	109699	9	45	109755	17	32	109763	23	30	109761	52	27	109758	60	23
N1:110073	chr01	110000	110146	+3:YAL022C;	5.30076	6	100	9.695	110074	848	23	110072	232	24	110072	151	27	110081	92	17	110078	150	27	110082	141	21	110076	191	24	110069	33	19	110068	17	30	110074	18	22	110080	14	21	110077	43	20	110072	206	21	110075	305
N1:110256	chr01	110183	110329	+2:YAL022C;	4.56633	5	100	8.167	110241	250	29	110232	82	36	110233	46	24	110231	32	27	110236	45	31	110257	45	28	110234	68	29	110221	10	31	110237	3	22				110235	1	0	110240	22	19	110220	59	25	110236	114
N1:110405	chr01	110332	110478	+1:YAL022C;	5.23856	6	91.75	10.033	110403	525	23	110402	365	21	110400	135	24	110408	89	24	110406	163	21	110407	125	21	110404	372	20	110399	114	16	110397	82	23	110406	57	14	110402	27	26	110404	209	23	110408	260	19	110403	438
N1:110669	chr01	110596	110742	-1:YAL022C; +18*:YAL021C;	2.38912	4	50	24.102	110664	127	26	110657	45	23	110666	13	22	110668	26	25	110655	19	20	110660	16	23	110666	28	19	110661	4	26	110681	6	11	110666	4	11				110667	2	13	110671	5	27	110671	10
N1:110831	chr01	110758	110904	+17:YAL021C;	5.8821	6	94.5	3.71	110827	443	19				110830	84	28	110830	65	18	110829	83	25	110825	102	24	110827	67	26	110832	7	16				110824	9	19	110837	11	25	110821	34	15	110828	12	14	110824	45
N1:110988	chr01	110915	111061	+16:YAL021C;	5.61327	6	100	7.005	110985	359	29	110969	118	25	110990	68	35	110991	43	28	110986	83	32	110984	80	25	110991	49	28	111030	7	22	110941	7	15	110977	8	26	110984	7	36	110997	29	25	110996	12	38	110997	9
N1:111156	chr01	111083	111229	+15:YAL021C;	3.74417	5	59.33	16.27										111167	40	34	111166	82	32										111173	5	25	111143	7	17	111188	3	5	111161	13	33
N1:111463	chr01	111390	111536	+13:YAL021C;	4.32401	5	100	10.479	111455	354	35				111468	70	37										111458	43	33	111406	5	27
N1:111763	chr01	111690	111836	+11:YAL021C;	3.63137	4	54.5	8.77				111821	135	43	111752	127	36	111735	78	32	111746	89	35	111745	83	32				111722	15	37				111754	22	26				111757	29	27	111755	28	32	111740	5
N1:111914	chr01	111841	111987	+10:YAL021C;	5.01071	6	80.25	12.91	111909	510	28				111912	122	28	111909	74	29				111918	129	24	111884	69	36	111914	15	21	111881	9	39	111911	9	31	111915	10	27	111912	32	21				111915	9
N1:112069	chr01	111996	112142	+9:YAL021C;	3.82807	5	95.5	18.308	112058	475	31	112051	137	31	112061	93	32	112060	69	33	112058	112	32				112060	61	38				112053	10	41	112061	8	27	112086	2	22				112057	22	23
N1:112234	chr01	112161	112307	+8:YAL021C;	5.28226	6	83.5	9.933	112221	552	26	112210	234	26	112229	139	29	112226	81	26	112215	154	22	112227	83	25	112219	65	28	112260	15	28	112219	7	17	112219	8	21				112227	34	19	112211	35	25	112224	20
N1:112402	chr01	112329	112475	+7:YAL021C;	5.74434	6	84.75	5.657	112401	523	25	112391	142	33	112403	141	24	112399	70	29	112398	109	29	112404	77	26	112403	87	26				112402	7	10	112402	19	24	112370	7	18	112404	56	27	112399	67	23	112404	21
N1:112563	chr01	112490	112636	+6:YAL021C;	4.87404	5	83	4.324	112555	447	26	112549	108	32	112556	127	26	112554	56	31	112555	106	31	112554	85	29	112554	94	28	112551	20	23	112556	16	20	112559	8	22	112547	2	11				112555	65	19	112555	41
N1:112868	chr01	112795	112941	+4:YAL021C;	4.94206	5	100	2.881	112866	453	26	112863	170	24	112869	114	25	112870	62	22	112865	94	25	112863	88	29	112862	137	28	112867	40	18	112874	24	25	112868	27	20	112863	13	24	112858	62	24	112870	161	24	112858	143
N1:113026	chr01	112953	113099	+3:YAL021C;	5.85527	6	89.75	4.131	113027	149	15	113031	60	19	113035	61	20	113030	21	12	113031	42	15	113031	40	17	113025	71	22	113032	9	10	113024	7	23	113029	20	7	113037	5	8	113020	90	20	113026	95	15	113027	86
N1:113192	chr01	113119	113265	+2:YAL021C;	5.39932	6	84.25	8.824	113186	302	18	113185	108	19	113184	91	18	113186	48	16	113185	77	19	113184	79	13	113186	211	14	113185	18	12	113186	25	13	113186	10	22	113187	15	18	113188	146	17	113186	277	12	113186	357
N1:113359	chr01	113286	113432	+1:YAL021C;	2.97179	4	100	19.466	113353	267	20	113349	101	25	113352	54	23	113352	49	23	113352	71	24	113350	82	24	113352	536	18	113352	94	18	113355	66	22	113363	33	19	113347	14	18	113354	413	17	113353	226	16	113357	260
N1:113628	chr01	113555	113701	+7*:YAL020C; -1:YAL021C;	4.04754	5	100	13.069	113630	240	25	113630	120	30	113635	87	25	113619	49	29	113634	86	28	113625	46	27	113628	281	24	113628	47	21	113631	60	17				113625	22	20	113626	309	25	113630	47	24	113621	73
N1:113789	chr01	113716	113862	+6:YAL020C;	3.95193	4	73.5	3	113789	360	23				113794	93	26	113788	37	24	113793	111	30	113795	74	29	113789	207	24	113790	17	7	113791	42	21	113788	38	20	113795	35	19	113787	124	26	113789	32	17	113788	28
N1:113941	chr01	113868	114014	+5:YAL020C;	4.71303	5	66.67	6.633	113946	267	28	113936	83	24	113942	74	31	113941	30	25	113944	63	29	113952	58	19				113945	8	28	113940	24	25	113938	40	16	113944	16	22	113938	142	27	113945	34	15	113952	19
N1:114096	chr01	114023	114169	+4:YAL020C;	2.48624	3	13	13.115	114095	617	23	114092	113	27	114099	95	24	114094	57	23	114103	69	30				114092	161	24	114117	4	11	114095	27	30	114102	21	21				114094	98	26	114097	71	19
N1:114248	chr01	114175	114321	+3:YAL020C;	4.58728	5	80	8.019	114251	303	21	114246	87	23	114264	79	26	114249	51	22	114268	73	27	114246	59	23	114250	214	18							114258	9	21	114255	10	17	114245	81	27	114248	146	21	114243	63
N1:114411	chr01	114338	114484	+2:YAL020C;	4.71914	5	72.67	6.686	114420	371	20	114411	142	23	114415	97	25	114419	56	23	114423	125	28	114418	85	19	114418	273	18	114413	13	16	114420	27	12	114415	34	16	114406	18	17	114417	142	22	114418	225	17	114415	241
N1:114582	chr01	114509	114655	+1:YAL020C; -1:YAL019W;	5.69154	6	100	6.08	114581	757	17	114582	376	25	114583	199	22	114581	137	16	114585	211	22	114580	177	23	114582	887	17	114574	69	16	114579	55	17	114584	40	19	114581	26	15	114581	269	22	114581	609	14	114580	673
N1:114851	chr01	114778	114924	-1:YAL020C; +1:YAL019W;	5.48373	6	100	8.256	114856	528	17	114858	182	18	114857	134	17	114857	128	16	114858	128	15	114859	99	19	114858	366	17	114859	11	12	114855	19	14	114866	4	8	114854	10	24	114856	68	23	114858	235	15	114859	349
N1:115021	chr01	114948	115094	+2:YAL019W;	4.55195	5	71.67	8.649	115024	327	22	115026	110	18	115023	114	17	115024	63	21	115021	92	27	115022	90	18	115023	154	18	115021	12	27	115026	11	3	115022	11	11	115019	5	25	115024	78	19	115022	233	14	115026	291
N1:115178	chr01	115105	115251	+3:YAL019W;	4.72741	5	98.33	6.38	115189	492	22	115192	217	21	115187	139	26	115184	107	19	115182	142	20	115182	101	17	115186	177	21	115187	22	18	115193	17	21	115197	29	20	115180	10	16	115187	44	19	115188	330	17	115189	247
N1:115352	chr01	115279	115425	+4:YAL019W;	4.19768	6	75	21.951	115357	387	27	115380	140	23	115348	104	29	115354	76	28	115354	88	30	115351	93	22	115349	102	26	115351	10	19	115342	14	20	115373	14	25	115347	9	29	115350	45	23	115353	114	24	115353	93
N1:115526	chr01	115453	115599	+5:YAL019W;	4.71	6	83	13.971	115530	579	22	115535	157	26	115517	129	28	115521	91	25	115514	118	27	115525	107	26	115530	185	25	115512	14	26	115513	17	22	115525	15	23	115520	13	17	115525	37	29	115535	144	20	115525	61
N1:115684	chr01	115611	115757	+6:YAL019W;	4.5302	5	90.75	8.927	115683	449	24	115686	144	31	115679	136	26	115680	108	22	115683	148	22	115680	103	26	115677	140	23	115691	8	13	115682	17	33	115688	19	21	115676	8	14	115677	74	21				115685	28
N1:115969	chr01	115896	116042	+8:YAL019W;	3.1135	4	68.5	15.801																																		116006	23	31	116014	28	32	116009	9
N1:116131	chr01	116058	116204	+9:YAL019W;	2.9032	4	100	19.715	116164	615	43	116091	236	33	116160	127	40	116093	122	42	116094	129	43	116097	99	40	116092	99	43	116165	22	37	116177	17	41	116091	21	40	116092	19	28	116156	23	34	116182	24	34
N1:116396	chr01	116323	116469	+11:YAL019W;	2.62367	5	88.5	42.101	116343	505	40	116401	229	24	116341	136	41	116337	89	43	116399	108	32							116396	7	35	116352	12	38				116404	6	38	116332	30	34				116417	7
N1:116572	chr01	116499	116645	+12:YAL019W;	3.34588	5	70.67	21.778	116505	402	30				116503	102	35	116500	79	27							116501	34	31	116589	8	28							116592	8	42	116625	17	43				116626	4
N1:116773	chr01	116700	116846	+13:YAL019W;	2.67038	6	81.5	34.464	116826	678	32	116830	138	41	116827	113	35	116818	98	33	116834	93	32	116812	116	34	116822	56	35	116811	1	0	116821	6	28	116819	7	12	116774	2	3	116790	17	32	116813	20	27	116835	6
N1:116954	chr01	116881	117027	+14:YAL019W;	5.27939	6	86.5	10.073	116975	333	34				116979	62	41	116972	58	33				116965	55	35				116980	5	8	116991	6	27	116988	2	3				116957	11	34	116979	11	28
N1:117104	chr01	117031	117177	+15:YAL019W;	3.0606	5	81.67	24.566	117131	612	36							117131	93	33	117134	136	33	117131	101	32				117158	5	15				117159	5	38				117134	9	34	117128	7	28	117170	8
N1:117320	chr01	117247	117393	+16:YAL019W;	2.91733	5	99	42.417	117311	609	36				117283	141	37	117295	106	37	117323	102	35	117282	130	34	117379	34	42	117377	8	23				117328	4	34				117308	11	24	117307	9	37
N1:117584	chr01	117511	117657	+18:YAL019W;	3.42924	5	92.67	20.717	117597	681	37	117582	164	34	117652	124	37	117653	102	38	117583	88	36	117585	96	30										117579	5	8
N1:117741	chr01	117668	117814	+19:YAL019W;	4.8506	6	100	16.473	117752	552	38	117738	154	39	117806	99	42	117804	124	41	117802	99	44	117749	111	36	117742	52	37	117743	6	16	117694	5	25				117684	5	7				117749	10	31	117720	3
N1:118118	chr01	118045	118191	+21:YAL019W;	2.23929	4	100	39.067	118049	432	38	118049	89	39	118048	80	41	118046	77	37	118046	65	36	118048	83	30	118052	34	37				118178	1	0				118061	10	29	118046	6	24	118051	12	21	118110	3
N1:118377	chr01	118304	118450	+23*:YAL019W; +8*:YAL018C;	1.62211	3	11.5	40.216							118358	19	40	118360	20	38																118356	4	42
N1:118559	chr01	118486	118632	+7:YAL018C;	2.96135	4	50	16.235				118613	146	34				118588	59	22	118600	68	33	118593	78	29	118536	13	48							118588	3	22	118570	2	35	118568	3	29				118549	4
N1:118714	chr01	118641	118787	+6:YAL018C;	5.55974	6	100	7.312	118703	511	37	118780	224	26	118698	108	40				118776	86	29	118781	56	27	118698	63	39	118751	21	30	118777	5	23	118781	8	19	118783	7	14	118726	3	24	118687	10	23	118773	16
N1:118901	chr01	118828	118974	+5:YAL018C;	4.54027	6	100	18.283	118892	412	34				118896	70	29	118897	75	26							118893	28	27	118924	1	0							118950	5	20	118907	5	29	118887	2	2
N1:119072	chr01	118999	119145	+4:YAL018C;	4.61147	6	91	18.381	119074	837	27	119091	174	31	119078	116	29	119082	113	20	119087	97	30	119084	110	23	119075	44	28	119096	10	20	119072	7	26				119108	3	6	119071	9	22	119108	9	23	119087	16
N1:119265	chr01	119192	119338	+3:YAL018C;	4.74836	6	97	14.519	119272	364	24	119272	129	22	119270	73	26	119271	63	24	119270	46	31	119276	54	21	119272	25	31				119307	4	42							119261	8	23	119278	16	18	119280	7
N1:119441	chr01	119368	119514	+2:YAL018C;	5.52867	6	100	7.789	119443	467	25	119448	177	24	119441	83	22	119437	82	24	119443	68	30	119442	73	17	119446	33	36							119379	7	25	119375	23	26	119449	8	30	119431	8	15	119441	13
N1:119608	chr01	119535	119681	-1:YAL017W; +1:YAL018C;	2.83004	4	67	19.33							119590	31	23	119589	36	24							119642	6	32	119585	7	22	119582	4	17	119546	13	27	119575	29	27				119580	6	19	119592	6
N1:119755	chr01	119682	119828	0:YAL017W; -1:YAL018C;	1.17946	2	15	24.749
N1:119913	chr01	119840	119986	+1:YAL017W;	4.67753	5	44.67	7.127	119914	246	14	119913	63	27	119913	60	21	119913	55	12	119913	47	20	119912	43	18	119912	89	14	119913	27	26	119912	12	6	119913	14	5	119916	15	17	119911	138	16	119913	109	16	119911	187
N1:120083	chr01	120010	120156	+2:YAL017W;	5.69771	6	74.25	5.989	120082	202	23				120122	119	23	120076	26	24	120080	26	25	120084	30	36	120117	121	17	120117	1357	3	120117	1670	2	120117	3022	2	120117	1216	3	120084	17	22	120078	40	16	120080	101
N1:120282	chr01	120209	120355	+3:YAL017W;	2.08463	3	100	22.234	120240	1018	25	120251	225	27				120243	135	28	120251	163	26	120239	108	29										120349	5	36				120238	9	17	120248	205	23	120240	266
N1:120560	chr01	120487	120633	+5:YAL017W;	2.76287	5	100	26.369	120545	347	27	120614	88	36	120540	56	26	120542	46	30	120542	43	27	120537	61	29	120545	42	28	120592	2	4	120626	3	24							120552	14	39	120558	38	25	120552	37
N1:120732	chr01	120659	120805	+6:YAL017W;	3.84791	6	91.75	28.801	120727	761	30	120767	195	32	120714	95	31	120709	89	31	120717	128	31	120708	101	36	120732	85	31	120766	9	27	120800	3	28	120707	7	4	120780	7	27	120702	7	35	120729	53	27	120710	26
N1:120898	chr01	120825	120971	+7:YAL017W;	2.50127	5	79.33	33.396	120900	328	38							120955	58	38	120958	95	33	120956	82	36	120950	41	33				120958	8	14	120893	4	0							120906	11	36	120893	11
N1:121177	chr01	121104	121250	+9:YAL017W;	2.77276	4	100	25.652							121143	106	37	121133	62	44	121169	89	34	121140	67	34	121169	40	36				121216	5	22	121148	6	31	121234	2	2				121222	10	27	121169	3
N1:121471	chr01	121398	121544	+11:YAL017W;	2.55277	4	100	21.833				121468	121	43	121487	101	37	121498	99	36	121488	101	37	121469	89	41	121460	48	36							121428	2	32	121464	3	22	121467	5	33	121533	12	34	121468	3
N1:121654	chr01	121581	121727	+12:YAL017W;	4.79464	6	90.5	14.905	121677	559	26	121658	104	33	121667	91	33	121648	61	36	121668	109	32	121662	69	38	121680	55	34				121589	6	17	121665	4	9	121669	12	32	121615	7	32				121669	2
N1:121831	chr01	121758	121904	+13:YAL017W;	4.32445	6	94.75	23.935	121840	523	30	121835	86	34	121835	70	40	121839	76	41	121831	105	35	121837	82	34	121844	28	27	121840	13	33	121840	1	0	121893	3	6				121800	8	20	121844	7	21	121840	4
N1:121994	chr01	121921	122067	+14:YAL017W;	3.4864	5	100	17.393	122004	898	29	122015	227	32	121992	133	32	121994	98	32	121996	124	32	122001	112	31	121995	80	29	122003	18	26	121996	10	24				121965	5	11	122004	3	23	122001	16	17
N1:122147	chr01	122074	122220	+15:YAL017W;	3.61674	5	100	31.169	122160	849	28				122156	119	35	122155	101	34	122157	148	33	122157	116	41	122159	57	29	122156	5	51	122181	8	16	122100	10	37	122151	6	9				122157	11	30	122170	5
N1:122446	chr01	122373	122519	+17:YAL017W;	4.86548	5	100	4.438				122380	161	45	122435	79	39	122499	69	42	122448	91	32	122443	86	32	122448	31	42	122496	6	39	122504	3	45				122469	1	0	122399	6	37	122430	8	31	122375	5
N1:122599	chr01	122526	122672	+18:YAL017W;	3.35252	4	50.5	12.258	122614	528	34	122662	131	30	122656	64	36	122652	69	39	122609	97	34	122655	58	29				122657	3	29	122661	1	0	122575	4	14				122635	5	32	122668	10	24	122636	4
N1:122796	chr01	122723	122869	+19:YAL017W;	3.28208	5	87	41.878	122795	452	31													122836	68	42	122791	23	27	122807	9	35							122785	2	10	122810	7	29				122796	3
N1:122946	chr01	122873	123019	+20:YAL017W;	2.7159	4	100	27.621	122970	701	32	122996	136	37	122935	103	44	122904	78	40	122933	131	39	122997	89	38	122975	65	30				122898	4	29	123012	7	24	122960	8	37	122969	8	41	122971	11	33	122992	1
N1:123144	chr01	123071	123217	+21:YAL017W;	3.36955	6	99.25	33.369	123144	838	31	123160	231	30	123107	163	36	123100	135	36	123128	163	35	123156	99	32	123138	61	35	123105	14	35	123106	8	18				123157	4	57	123138	25	34	123150	15	23	123143	4
N1:123320	chr01	123247	123393	+22:YAL017W;	3.12297	5	74.33	24.234	123333	555	31	123335	139	28	123333	67	30	123322	81	31	123339	120	31	123335	74	29	123317	51	31	123366	7	31	123324	5	11	123360	9	28	123335	3	0
N1:123482	chr01	123409	123555	+23:YAL017W;	5.25058	6	100	10.342				123497	139	33	123481	105	34	123485	85	33				123491	83	37	123480	49	36				123508	6	26	123520	6	44	123491	6	30	123473	16	32	123465	11	28	123420	9
N1:123707	chr01	123634	123780	+24:YAL017W;	1.72226	4	82.5	33.619	123642	615	36				123641	85	34	123641	101	30	123652	76	33	123677	60	32	123642	37	38				123696	2	28	123668	2	8	123718	3	26	123641	5	53	123778	5	26	123637	3
N1:123857	chr01	123784	123930	+25*:YAL017W;	4.35271	6	91.75	19.539	123839	617	39	123841	149	42	123837	108	35	123867	71	31	123843	128	35	123849	83	36	123840	57	35				123861	1	0				123868	1	0	123834	6	26				123842	6
N1:124021	chr01	123948	124094		4.31105	6	100	19.281	124022	514	31	124038	139	29	124026	85	26	124026	81	29	124037	132	23	124032	84	30	124025	66	27	124039	8	38	124017	6	22	124007	3	31	124025	1	0	124021	17	30	124029	6	17
N1:124207	chr01	124134	124280		4.56906	6	100	17.58	124191	479	33	124244	172	28	124243	112	36	124254	120	40	124191	116	31	124240	129	30	124192	52	24	124231	4	17				124239	5	28	124234	2	22	124228	16	24	124185	17	33	124178	9
N1:124359	chr01	124286	124432		2.41218	3	100	14.468	124355	208	33										124384	19	26				124379	12	22				124352	5	40	124400	1	0				124406	7	27	124367	3	29	124384	1
N1:124597	chr01	124524	124670	-1:YAL016W;	2.80232	4	50	32.949	124604	152	30	124599	53	17	124607	17	22	124599	26	36	124597	29	34	124560	16	30	124598	63	31	124595	7	24	124615	9	15				124660	1	0	124649	5	26	124619	6	31	124590	4
N1:124852	chr01	124779	124925	+1:YAL016W;	5.51742	6	87	8.091	124851	431	25	124847	149	26	124853	105	28	124854	72	22	124852	119	19	124853	77	26	124850	233	22	124854	47	21	124847	20	12	124857	30	20	124857	7	15	124851	78	22	124849	196	20	124850	294
N1:125002	chr01	124929	125075	+2:YAL016W;	3.29348	4	62	12.447	125009	267	34	125009	96	33				125007	38	31	125004	84	34				125007	60	30	125018	21	23				125020	9	24	125016	2	7				125003	73	27	125013	135
N1:125171	chr01	125098	125244	+3:YAL016W;	3.64433	6	81.25	20.295	125167	459	32	125184	126	23	125160	87	33	125172	50	26	125179	95	26	125153	81	30	125160	64	26	125182	27	20	125175	4	7	125190	4	24	125176	23	10	125112	16	28	125172	150	24	125175	161
N1:125329	chr01	125256	125402	+4:YAL016W;	4.62885	5	84.33	7.616	125319	258	28	125361	71	27	125328	64	31				125338	26	22	125310	30	28	125321	18	30	125359	7	25	125345	10	31				125330	3	13	125306	9	18	125320	26	20	125338	22
N1:125501	chr01	125428	125574	+5:YAL016W;	5.45226	6	92.25	8.337	125503	645	24	125517	220	17	125502	113	29	125503	90	28	125511	122	23	125497	97	32	125499	41	23	125518	4	7	125508	2	21				125495	3	17	125487	8	16	125499	56	25	125502	51
N1:125794	chr01	125721	125867	+7:YAL016W;	3.37171	5	85.33	19.274	125759	540	38	125742	142	38	125760	122	32	125763	118	31	125765	72	40	125755	121	28	125753	42	32	125761	11	36	125809	8	28	125818	2	0	125738	2	17				125761	43	30
N1:125943	chr01	125870	126016	+8:YAL016W;	3.98182	5	100	13.795	125959	494	30	125971	122	45	125951	78	28	125959	62	34	125955	69	25	125943	81	34	125963	33	35	126004	2	9							125981	1	0				125952	23	29	125981	7
N1:126175	chr01	126102	126248	+9:YAL016W;	1.72488	5	100	49.003	126122	567	35	126173	146	30	126121	87	39	126181	85	40	126169	125	33	126201	82	37	126117	34	43	126186	6	17	126204	3	11	126170	7	22	126172	6	21				126165	20	29	126167	11
N1:126344	chr01	126271	126417	+10:YAL016W;	3.12441	5	83.33	30.712				126352	136	38				126332	47	41	126329	92	38	126349	61	35	126310	36	35				126395	2	37				126328	8	14	126409	6	31				126344	7
N1:126528	chr01	126455	126601	+11:YAL016W;	3.37537	5	100	29.92	126469	443	38	126560	91	39	126583	110	39	126563	78	34	126560	74	36	126570	67	38	126468	44	38	126485	4	47							126476	3	28	126566	15	31				126495	6
N1:126682	chr01	126609	126755	+12:YAL016W; +10*:YAL015C;	2.38298	5	100	31.053	126632	575	38	126742	59	33							126754	46	35				126646	40	31	126691	12	29	126647	6	22	126634	4	6	126673	3	32				126625	26	33	126663	5
N1:126845	chr01	126772	126918	+14*:YAL014C; +13*:YAL016W; +9:YAL015C;	2.24751	3	67	16.523	126863	53	38																126831	16	45				126834	1	0	126858	2	36	126895	1	0							126839	2
N1:127005	chr01	126932	127078	+13:YAL014C; +8:YAL015C;	4.37486	6	100	19.031	127012	805	32	127021	251	34	127015	156	30	127015	138	29	127051	115	28	127011	132	27	127016	217	30	127049	30	26	127035	21	32	127052	28	22	127055	20	23	127007	54	30	127021	45	26	127011	28
N1:127185	chr01	127112	127258	+12:YAL014C; +7:YAL015C;	3.49552	5	100	16.517	127201	445	33	127200	175	36	127206	100	38	127200	77	36	127203	81	37	127192	80	37	127201	166	30	127201	17	33				127222	28	31				127163	88	26	127208	44	34	127160	21
N1:127362	chr01	127289	127435	+11:YAL014C; +6:YAL015C;	4.57603	6	100	17.348	127375	620	27	127374	243	27	127371	116	25	127368	101	28	127381	118	30	127365	101	23	127373	248	28	127374	35	25	127358	30	32	127376	32	26	127337	19	36	127339	129	33	127374	124	27	127359	89
N1:127531	chr01	127458	127604	+10:YAL014C; +5:YAL015C;	5.42671	6	100	8.847	127530	357	25	127541	154	26	127531	78	28	127528	70	28	127528	75	27	127524	60	27	127531	200	24	127546	39	27	127527	22	26				127542	12	18	127517	104	27	127529	128	22	127530	100
N1:127702	chr01	127629	127775	+9:YAL014C; +4:YAL015C;	5.14565	6	100	11.256	127694	507	23	127697	216	28	127693	92	24	127701	86	28	127692	107	24	127691	91	20	127701	411	24	127704	44	27	127714	40	23	127706	32	21	127698	25	24	127686	173	23	127700	225	23	127709	233
N1:127882	chr01	127809	127955	+8:YAL014C; +3:YAL015C;	4.67962	5	100	7.155	127879	552	22	127883	211	19	127883	106	20	127885	91	23	127881	109	23	127884	116	24	127882	621	21	127881	65	18	127885	97	16	127884	53	22	127895	21	27	127881	248	26	127880	387	19	127885	464
N1:128040	chr01	127967	128113	+7:YAL014C; +2:YAL015C;	3.98696	5	100	13.936	128030	512	19	128042	276	20	128030	107	24				128035	99	23	128035	90	17	128031	406	19	128035	76	28	128038	50	27	128033	37	28							128030	198	17
N1:128388	chr01	128315	128461	+5:YAL014C; -1:YAL015C;	3.83778	5	100	23.91	128391	255	28	128367	86	32	128390	57	28	128390	30	35	128386	64	30	128391	69	32										128388	11	25	128382	14	34
N1:128540	chr01	128467	128613	+4:YAL014C;	4.79851	5	57.33	5.477	128540	306	20	128539	82	24	128543	86	21				128542	54	23	128542	58	21	128539	198	17	128538	12	25	128539	18	11	128538	17	11	128537	14	19	128542	56	24	128539	174	15	128537	143
N1:128845	chr01	128772	128918	+2:YAL014C;	4.89806	6	100	11.978	128837	435	27	128833	138	27				128839	60	27							128835	280	25	128837	33	31	128853	26	15	128860	19	19	128837	28	24				128845	226	22	128835	366
N1:129014	chr01	128941	129087	+1:YAL014C; -1:YAL013W;	5.16388	6	100	10.381	129017	400	21	129023	118	19	129010	95	20	129014	44	16	129022	93	24	129014	97	21	129021	414	20	129003	94	20	129015	63	16	129019	35	12	129012	39	16	129004	271	20	129021	222	20	129008	444
N1:129283	chr01	129210	129356	-1:YAL014C; +1:YAL013W;	5.9348	6	100	2.757	129287	1037	14	129287	350	14	129288	209	16	129289	152	15	129285	191	13	129285	166	13	129287	822	13	129290	87	15	129291	87	14	129286	55	11	129290	64	12	129286	426	13	129285	668	12	129290	1117
N1:129466	chr01	129393	129539	+2:YAL013W;	5.89324	6	100	3.545	129467	640	15	129468	259	14	129467	143	17	129466	71	17	129466	188	15	129467	127	13	129469	270	15	129471	51	13	129468	41	16	129469	31	11	129468	33	14	129467	111	17	129466	382	12	129468	680
N1:129633	chr01	129560	129706	+3:YAL013W;	4.89476	5	93.67	3.912	129632	361	26	129641	139	19	129631	101	25				129639	74	29	129641	70	21	129633	185	23	129640	26	21	129631	30	20	129633	20	25	129629	12	11	129634	113	17	129638	198	18	129638	303
N1:129790	chr01	129717	129863	+4:YAL013W;	3.93522	4	100	3.559				129808	83	30				129756	44	25	129810	55	30	129805	44	26										129784	4	12	129783	13	12	129788	90	22				129807	120
N1:129957	chr01	129884	130030	+5:YAL013W;	3.81161	4	100	6.185	129961	821	17	129962	290	18	129961	215	18	129964	119	16	129963	240	17	129960	196	16	129958	186	18	129955	14	15	129956	33	17	129967	16	14	129969	28	24	129959	96	17	129959	196	14	129964	159
N1:130121	chr01	130048	130194	+6:YAL013W;	4.52906	5	100	8.573	130120	453	22	130113	113	24	130125	109	23	130112	41	21	130115	83	25	130111	76	23	130113	85	22	130121	21	17	130120	19	19	130124	12	17	130118	10	14	130124	54	21	130121	46	18	130122	38
N1:130284	chr01	130211	130357	+7:YAL013W;	4.39222	5	72.67	9.783	130287	222	24	130292	65	32	130281	58	31	130292	44	21	130290	50	22	130291	41	20	130289	49	32	130297	10	18	130279	12	19	130273	12	13				130289	82	23	130293	21	32	130291	21
N1:130464	chr01	130391	130537	-1:YAL012W; +8*:YAL013W;	3.77252	5	100	16.346	130463	317	18	130480	155	11	130459	64	22	130467	19	20	130474	66	18	130475	32	15	130467	121	17	130477	14	21	130471	13	12	130485	5	23	130463	7	22	130454	58	16	130466	45	17	130480	26
N1:130749	chr01	130676	130822	+1:YAL012W;	3.26805	4	68	13.292	130759	292	21	130746	188	21	130758	84	20	130759	60	15	130755	99	26	130752	49	20	130760	250	24	130759	18	24	130760	4	15	130753	7	21	130763	10	16	130749	21	29	130762	119	23	130755	252
N1:130933	chr01	130860	131006	+2:YAL012W;	2.55444	4	87.5	23.445	130930	383	29	130913	105	23	130933	88	27	130926	52	26	130923	91	28	130920	86	27	130940	134	31	130930	12	19	130925	5	19	130943	10	26	130911	10	21	130929	23	28	130943	184	27	130925	328
N1:131112	chr01	131039	131185	+3:YAL012W;	3.73622	6	75.25	23.389	131105	645	23	131102	179	17	131104	106	24	131100	63	23	131103	111	24	131100	92	27	131102	175	25	131117	14	22	131100	21	13	131102	22	23	131119	17	24	131105	41	26	131105	366	20	131099	380
N1:131274	chr01	131201	131347	+4:YAL012W;	4.52044	5	100	8.701	131260	254	31	131261	95	32	131251	83	37	131260	31	28	131276	38	34	131297	53	39	131290	52	36	131291	4	25	131286	13	36							131286	65	31	131280	112	27	131274	82
N1:131429	chr01	131356	131502	+5:YAL012W;	3.779	4	74	6.702	131439	439	32	131439	132	28	131456	128	35	131474	70	34	131472	99	30	131476	98	31	131440	84	31	131471	19	21	131455	20	37	131453	19	39	131479	17	36	131471	56	33	131439	145	27	131462	90
N1:131607	chr01	131534	131680	+6:YAL012W;	2.4906	5	73.33	27.024	131594	451	36	131641	111	32	131649	87	35	131639	69	31	131647	88	38	131643	78	26	131589	92	36	131637	13	30	131662	16	32	131641	16	40	131640	7	43	131642	87	27	131586	105	33	131638	47
N1:131808	chr01	131735	131881	+7:YAL012W;	3.45744	5	72.33	20.801	131830	275	41	131809	123	37	131824	70	32				131803	85	29	131824	59	25	131803	75	33	131803	10	29	131835	20	32	131795	10	19	131829	14	39	131814	106	25	131798	61	34	131826	61
N1:131987	chr01	131914	132060	+8*:YAL012W; -1:YAL011W;	5.13672	6	100	10.602	131982	325	23	131986	170	19	131977	83	23	131977	66	21	131979	60	21	131974	94	16	131982	107	22	131985	21	14	131984	43	16	131979	22	22	131985	12	18	131970	171	20	131975	56	26	131988	84
N1:132234	chr01	132161	132307	+1:YAL011W;	5.42735	6	83.5	8.735	132234	618	21	132228	315	21	132232	140	17	132232	136	19	132232	164	22	132232	147	20	132233	359	17	132230	59	18	132232	68	17	132230	34	20	132230	28	18	132235	122	17	132234	304	17	132229	777
N1:132398	chr01	132325	132471	+2:YAL011W;	4.30235	5	75.33	10.521	132402	332	19	132402	93	22	132398	90	24	132397	28	21	132401	56	20	132398	43	21	132399	116	19	132387	7	23	132400	11	15	132384	12	25	132377	9	8	132394	103	21	132405	175	13	132393	232
N1:132567	chr01	132494	132640	+3:YAL011W;	5.4511	6	100	8.532							132566	103	19	132570	52	23							132569	148	24	132568	54	17	132570	38	19	132575	24	22	132565	17	13	132569	59	19	132573	239	16	132569	220
N1:132731	chr01	132658	132804	+4:YAL011W;	3.68971	4	100	8.124	132717	939	25	132710	371	26	132720	149	25	132718	130	31	132712	224	23	132712	167	23	132721	204	28				132730	19	25				132735	6	18	132730	36	29	132739	258	22	132718	201
N1:132880	chr01	132807	132953	+5:YAL011W;	3.4883	4	98.5	10.583	132892	672	23	132891	210	22	132886	114	19	132885	101	22	132889	131	18	132889	83	16	132894	102	23	132859	8	29	132880	10	12	132878	9	11	132882	5	27	132889	26	17	132889	101	19	132890	100
N1:133049	chr01	132976	133122	+6:YAL011W;	4.39213	5	96.33	10.455	133058	362	26	133067	95	27	133051	75	28	133064	33	29	133065	40	19	133050	35	25	133056	46	30	133056	9	22	133066	3	5	133071	3	14	133045	2	15	133053	14	18	133056	31	22	133061	16
N1:133214	chr01	133141	133287	+7:YAL011W;	3.42843	5	100	18.534	133236	449	32				133211	90	32	133238	61	29	133237	74	30				133238	80	30							133228	15	17	133216	4	19	133205	25	25	133213	54	26
N1:133382	chr01	133309	133455	+8:YAL011W;	4.32601	5	100	11.127	133390	983	24	133388	300	25	133394	130	27	133405	132	27	133385	168	27	133373	128	29	133403	149	26	133393	29	27	133376	8	19	133412	20	35	133398	20	22	133359	20	28	133398	48	24	133380	21
N1:133558	chr01	133485	133631	+9:YAL011W;	4.9033	6	100	12.813	133562	363	29	133574	158	26	133557	57	27	133569	51	28	133573	81	30	133571	66	33	133555	39	24	133583	15	27	133573	5	24	133581	3	32	133574	5	29	133533	19	33	133565	24	25	133575	7
N1:133740	chr01	133667	133813	+10:YAL011W;	2.7922	4	100	18.822	133720	297	36	133779	113	38				133721	41	38							133782	61	34	133777	6	27				133767	5	21	133770	10	32	133799	20	35	133716	4	37
N1:134033	chr01	133960	134106	+11*:YAL010C; +12*:YAL011W;	5.46776	6	100	8.246	134032	533	26	134016	134	31	134038	109	31	134038	57	32	134031	63	30	134027	80	28	134036	60	29	134022	12	33	134020	7	24	134049	6	5	134028	8	18	134022	25	27	134035	16	23	134034	5
N1:134197	chr01	134124	134270	+10:YAL010C;	3.45514	5	93	30.939	134196	308	33							134195	36	37	134203	48	37	134198	45	27	134206	28	39													134191	3	35
N1:134354	chr01	134281	134427	+9:YAL010C;	3.89923	5	100	18.966	134353	570	25	134354	215	20	134355	72	24	134356	60	20	134359	89	28	134351	91	21	134355	59	21	134360	18	32	134358	4	12	134336	7	29	134295	3	43	134350	13	26	134355	14	20	134359	4
N1:134512	chr01	134439	134585	+8:YAL010C;	1.66214	3	98.5	25.515	134500	334	37							134504	54	37				134532	52	35							134543	4	22							134541	8	24
N1:134667	chr01	134594	134740	+7:YAL010C;	4.68978	5	91.67	6.804	134683	279	38	134625	76	37	134675	57	35	134690	36	40	134633	59	38				134650	37	39	134666	13	28							134648	6	21				134688	13	34	134660	5
N1:134848	chr01	134775	134921	+6:YAL010C;	5.32669	6	100	9.709				134830	79	40							134829	51	39							134834	14	29	134834	3	23	134865	6	17	134817	2	31	134862	29	21
N1:135158	chr01	135085	135231	+4:YAL010C;	4.84679	6	76.5	13.619	135163	606	24	135160	164	26	135163	74	23	135163	90	28	135160	75	27	135166	89	20	135162	127	26	135162	18	23	135151	10	24	135158	13	8	135162	17	15				135160	72	21	135162	86
N1:135324	chr01	135251	135397	+3:YAL010C;	5.95365	6	100	2.317	135331	690	20	135327	197	23	135326	121	20	135337	66	27	135332	114	26	135337	69	19	135330	177	19	135325	23	22	135322	17	16	135327	11	14	135309	15	18	135325	48	20	135331	152	16	135332	195
N1:135482	chr01	135409	135555	+2:YAL010C;	5.70095	6	100	6.022	135492	580	21	135489	206	26	135487	78	15	135491	95	22	135495	130	28	135490	93	15	135490	148	19	135498	20	19	135486	12	15	135488	14	9	135494	12	19	135488	22	20	135490	191	16	135490	253
N1:135656	chr01	135583	135729	-1:YAL009W; +1:YAL010C;	5.67618	6	100	6.242	135662	693	15	135658	286	14	135656	120	19	135658	144	12	135657	116	15	135660	110	13	135661	714	14	135656	90	14	135653	33	11	135648	70	13	135653	29	22	135660	191	14	135661	374	14	135655	592
N1:135880	chr01	135807	135953	+1:YAL009W; -1:YAL010C;	5.19098	6	100	10.633	135884	439	22	135884	161	30	135884	101	24	135890	61	27	135879	76	27	135882	81	27	135886	407	23	135886	121	22	135891	73	24	135896	61	19	135885	41	21	135886	250	23	135887	246	19	135887	384
N1:136041	chr01	135968	136114	+2:YAL009W;	4.88203	6	93	13.069	136039	350	30	136053	159	34	136039	57	36	136048	42	27	136047	65	31	136045	65	26	136042	202	26													136040	114	28	136048	118	27	136049	193
N1:136198	chr01	136125	136271	+3:YAL009W;	3.36261	5	76	33.65	136194	341	28	136206	111	35													136194	191	25	136201	45	25	136193	39	14	136191	26	21	136166	15	16	136189	51	27	136198	59	20	136207	87
N1:136357	chr01	136284	136430	+4:YAL009W;	5.61222	6	75.5	7.014	136364	375	24	136364	92	26	136360	57	24	136366	41	27	136360	54	31	136360	54	23	136361	132	25				136364	10	12	136389	7	36	136361	10	15	136361	38	31	136364	85	16	136363	69
N1:136530	chr01	136457	136603	+5*:YAL009W;	5.35268	6	100	9.109	136536	511	27	136531	127	31	136536	90	26	136536	71	29	136533	78	32	136528	63	28	136533	327	23	136502	29	26	136544	40	19	136545	25	27	136530	35	26	136539	183	28	136536	108	20	136534	130
N1:136700	chr01	136627	136773	-1:YAL008W;	3.34087	5	46	28.615	136704	123	37	136703	49	49	136702	21	31	136704	29	37	136702	21	32	136689	21	36	136702	93	32	136707	27	46				136700	11	21	136710	5	29	136696	41	39	136706	13	36	136704	37
N1:136921	chr01	136848	136994	+1:YAL008W;	5.06106	6	100	12.497	136892	222	28	136876	99	36	136893	36	25	136900	38	24	136876	46	32	136886	41	32	136897	155	27	136926	90	31	136885	19	23	136897	9	22	136903	16	24	136922	131	29	136906	86	21	136899	149
N1:137086	chr01	137013	137159	+2:YAL008W;	4.71186	5	100	6.573	137098	343	36	137100	150	42	137099	50	35	137099	57	35				137106	66	29	137097	320	31	137113	51	27	137093	50	30	137097	48	26	137103	34	30	137098	243	30	137094	180	26	137098	260
N1:137241	chr01	137168	137314	+3:YAL008W;	3.35347	4	100	12.356													137204	45	32	137286	22	42																137245	127	28				137276	68
N1:137391	chr01	137318	137464	+4:YAL008W;	2.90741	4	78	17.056	137382	323	32	137388	94	35	137392	59	30	137381	38	31	137382	56	31	137449	44	31	137379	124	32	137378	16	17	137384	12	23	137399	8	19	137394	7	23	137410	42	30	137380	23	26	137459	24
N1:137556	chr01	137483	137629	+5*:YAL008W;	1.01519	3	32.5	30.892	137560	118	28	137552	29	34	137557	18	31				137564	17	34				137550	32	41	137569	2	22	137539	4	31							137576	8	28	137572	8	19
N1:137870	chr01	137797	137943	+4*:YAL007C;	3.88674	5	95.33	15.232							137891	53	35				137872	59	26	137906	53	33													137901	1	0	137900	36	33	137892	57	27	137882	44
N1:138047	chr01	137974	138120	+3:YAL007C;	3.07246	4	89	14.652	138053	441	23	138059	143	30	138052	61	23	138055	46	27	138058	74	26	138062	61	26	138055	62	23	138058	3	4	138057	10	29	138049	6	8	138058	7	36	138048	12	28	138059	38	22	138053	77
N1:138217	chr01	138144	138290	+2:YAL007C;	3.87446	5	100	31.825	138217	486	23	138216	171	27	138218	91	25	138216	60	23	138218	116	24	138224	94	25	138217	111	23	138216	11	33	138211	16	17	138216	15	11	138209	7	16	138221	36	24	138215	203	17	138218	197
N1:138388	chr01	138315	138461	+1:YAL007C; -1:CUT002;	4.19081	5	93	11.632	138387	319	18	138394	119	25	138388	53	21	138392	38	20	138388	63	24	138390	40	16	138386	117	20	138372	8	30	138416	9	27				138377	2	17	138379	25	23	138384	129	14	138398	227
N1:138645	chr01	138572	138718	-1:YAL007C; +1:CUT002;	4.20029	5	87.5	12.349	138657	281	22	138653	108	27	138664	34	25	138655	32	22	138665	35	28	138652	44	23	138660	115	26	138641	4	32	138680	13	40	138643	9	34	138661	10	26	138649	39	19	138662	4	31	138632	23
N1:138841	chr01	138768	138914	+2*:CUT002;	4.04236	6	89.5	20.294	138845	130	30	138846	47	35	138836	20	27	138846	16	32	138848	25	38	138840	26	30	138846	55	27	138835	3	7	138841	9	33	138833	4	12	138835	5	9	138840	21	27	138848	4	34	138846	13
N1:138995	chr01	138922	139068		2.35784	4	78	31.02	139003	260	15	138996	78	25	139008	28	22	138998	44	22	139000	39	25	139000	44	17	139003	94	14	139000	9	22	139001	16	23	139001	4	14	139009	9	14	138997	21	19	139014	7	21	138995	24
N1:139248	chr01	139175	139321		1.99938	3	48.5	27.538	139201	1	0	139192	2	28	139268	1	0				139199	2	36				139247	2	31	139194	1	0										139193	2	30
N1:139406	chr01	139333	139479	+14*:YAL005C;	2.70321	3	0	9.644	139419	51	32	139349	9	27				139404	2	27	139388	11	29	139334	4	40	139418	10	25	139397	1	0	139411	1	0										139378	2	12
N1:139570	chr01	139497	139643	+13:YAL005C;	4.37064	5	100	10.426	139567	468	17	139568	115	21	139563	61	28	139561	41	24	139562	68	23	139561	94	25	139567	171	17	139580	10	24	139576	40	26	139581	28	23	139561	23	22	139579	36	27	139569	21	17	139568	14
N1:139731	chr01	139658	139804	+12:YAL005C;	4.78883	6	75.5	12.891	139723	179	31	139728	41	19	139717	25	17	139722	20	31	139724	40	30	139722	46	30	139724	35	26	139735	3	21	139745	15	31				139774	1	0	139756	5	24	139725	6	17	139716	4
N1:139916	chr01	139843	139989	+11:YAL005C;	2.01272	3	100	26.633
N1:140086	chr01	140013	140159	+10:YAL005C;	2.89481	4	50	28.218				140110	16	11				140103	2	5				140111	8	12	140108	6	0	140115	2	2													140111	3	13	140095	2
N1:140361	chr01	140288	140434	+8:YAL005C;	1.68184	2	100	14.142							140393	3	0
N1:140701	chr01	140628	140774	+6:YAL005C;	1.01143	2	-1	36.062	140718	1	0																140707	1	0
N1:140880	chr01	140807	140953	+5:YAL005C;	1.35426	2	-1	21.213
N1:141045	chr01	140972	141118	+4:YAL005C;	2.20951	3	100	17.474
N1:141213	chr01	141140	141286	+3:YAL005C;	3.77624	4	100	6.733	141242	240	31				141191	22	28	141185	12	26	141196	27	28	141184	20	32	141202	77	27	141243	28	38	141229	10	32										141208	100	25	141200	110
N1:141369	chr01	141296	141442	+2:YAL005C;	5.41655	6	92.5	8.509				141323	55	40	141371	26	24	141341	16	32							141379	68	36				141380	20	36	141331	6	21	141368	7	24	141320	16	30	141368	37	27	141370	104
N1:141597	chr01	141524	141670	0:YAL005C;	4.68434	6	88.5	22.113	141553	234	32	141626	40	25	141608	13	35	141548	23	29	141539	16	35	141626	6	27	141552	112	32	141614	36	45	141547	15	26	141548	17	34	141543	16	29	141560	4	27	141551	49	31	141553	85
N1:141881	chr01	141808	141954	-1:YAL003W;	1.65195	3	100	42.036	141892	1	0				141926	1	0													141949	5	16
N1:142184	chr01	142111	142257	+1*:YAL003W;	2.86294	5	89	28.745	142187	209	31	142175	82	28	142179	49	27	142160	59	34	142176	40	30	142174	52	22	142182	408	24	142186	249	29	142186	49	25	142182	19	17				142195	79	27	142185	108	21	142171	197
N1:142430	chr01	142357	142503	+1*:anti004;	3.31751	6	89.25	45.977	142416	184	40	142422	128	33	142474	46	33	142421	44	36	142460	56	35	142474	45	38	142409	90	35	142478	38	36	142476	9	31	142459	10	27	142470	4	36	142443	32	39	142415	60	39	142422	186
N1:142635	chr01	142562	142708	-1:anti004;	3.17594	5	100	30.353	142647	179	36							142640	48	33				142699	66	39	142652	35	32				142705	22	32				142693	5	29	142693	29	41	142700	97	34	142653	153
N1:142796	chr01	142723	142869	+3*:anti005;	2.21953	4	47.33	29.017	142800	192	37	142792	127	32	142790	60	36	142809	46	33	142792	104	33				142805	33	36	142772	8	13	142864	10	25	142805	11	24	142860	6	26	142854	35	42				142803	189
N1:142963	chr01	142890	143036	+2:anti005;	3.30624	5	89	32.316				142985	107	30				142991	55	29	142994	70	40	142991	69	37	142985	24	39	142978	1	0				142971	3	42							142993	59	38	142981	117
N1:143306	chr01	143233	143379	-1:anti005; -1:YAL002W;	3.76573	5	20.33	24.789	143259	94	30	143318	25	34	143249	23	39	143319	14	26	143318	23	32	143316	15	28	143305	10	38										143337	1	0	143261	4	24	143236	9	14	143323	10
N1:143466	chr01	143393	143539	0:YAL002W;	1.59001	2	100	16.263	143515	12	35	143477	29	21	143479	4	6	143479	8	26	143478	8	22				143507	7	47	143462	1	0													143495	8	15	143482	3
N1:143763	chr01	143690	143836	+2:YAL002W;	2.96985	6	79.5	35.669				143730	70	41	143715	30	38							143805	41	40																143763	65	32
N1:143964	chr01	143891	144037	+3:YAL002W;	5.60731	6	88	6.911	143956	332	33	143958	98	31	143959	56	34	143953	54	27	143955	70	31	143957	50	27	143957	153	32	143952	24	41	143956	16	37				143956	5	34	143957	92	32	143958	150	25	143956	241
N1:144134	chr01	144061	144207	+4:YAL002W;	5.29899	6	100	9.524	144132	462	22	144131	175	26	144136	85	25	144130	77	22	144128	88	25	144131	90	25	144133	165	24	144138	24	23	144133	13	15	144128	16	20	144123	5	4	144132	52	22	144134	172	22	144137	170
N1:144289	chr01	144216	144362	+5:YAL002W;	3.69279	4	100	7.974	144294	441	28	144295	123	32	144291	94	32	144289	58	24	144290	90	26	144283	63	25	144298	143	28	144303	22	22	144299	17	26	144298	14	18	144315	16	24	144290	45	36	144298	95	26	144296	71
N1:144447	chr01	144374	144520	+6:YAL002W;	3.68395	4	42	8.18				144452	30	44				144448	38	34	144450	24	29				144453	38	36	144500	6	37										144511	5	24	144449	13	15	144454	11
N1:144596	chr01	144523	144669	+7:YAL002W;	3.44613	5	79	18.794	144599	256	32				144593	47	32				144598	51	29	144591	52	29							144652	5	34	144535	1	0	144601	1	0				144597	9	31
N1:144760	chr01	144687	144833	+8:YAL002W;	4.89889	6	100	14.19	144768	549	35							144769	109	38	144768	120	31	144769	91	37	144767	82	37							144770	19	32	144788	5	24	144767	13	30	144770	20	39	144743	7
N1:145072	chr01	144999	145145	+10:YAL002W;	4.17491	6	100	19.661	145068	814	32	145037	188	36	145076	129	33	145085	152	31	145083	117	33	145049	115	32	145070	79	34	145082	5	24	145043	8	19	145036	4	23	145057	6	20	145075	14	35	145074	28	28	145032	1
N1:145255	chr01	145182	145328	+11:YAL002W;	4.38341	5	100	9.965	145261	455	32	145265	153	33	145257	78	30	145261	59	38	145260	102	34	145270	75	38	145266	49	33	145273	5	13	145242	5	38	145193	2	30	145277	2	11				145253	7	20	145269	6
N1:145430	chr01	145357	145503	+12:YAL002W;	1.96372	4	100	24.967	145422	526	36	145434	105	33	145430	69	30	145422	83	30	145423	93	33	145435	41	35	145426	37	30	145499	5	40	145420	5	36	145416	8	27				145419	9	40	145426	12	24	145446	2
N1:145633	chr01	145560	145706	+13:YAL002W;	3.96468	5	93	13.517				145631	157	36				145601	76	41										145667	6	24				145637	3	0				145625	7	25
N1:145815	chr01	145742	145888	+14:YAL002W;	2.50364	6	100	43.583	145748	634	40	145797	146	45				145750	102	42	145743	112	38	145742	84	44	145755	59	44										145780	5	1	145792	8	34	145745	8	38
N1:145995	chr01	145922	146068	+15:YAL002W;	1.99549	3	100	30.089	145978	798	32	145978	194	31	145981	125	31	145976	111	30							145969	99	31							145922	6	12	145952	7	24	145987	17	23				145970	7
N1:146151	chr01	146078	146224	+16:YAL002W;	3.07974	5	100	24.542	146159	419	35	146161	130	36	146157	72	35	146165	60	28	146172	54	33	146161	56	36	146160	36	32	146167	11	28	146157	2	3				146170	8	19	146187	6	28	146153	4	19	146183	4
N1:146346	chr01	146273	146419	+17:YAL002W;	2.69899	3	100	9.713				146356	87	40				146346	43	48	146345	66	31							146360	9	17				146275	2	0							146301	3	30	146407	4
N1:146590	chr01	146517	146663	+18:YAL002W;	1.00385	3	100	63.095													146520	74	38							146547	8	18				146642	1	0
N1:146757	chr01	146684	146830	+19:YAL002W;	2.32977	5	100	35.245				146746	122	33	146741	57	36	146743	54	34	146749	64	35	146745	62	37				146747	7	27	146735	6	25				146753	1	0	146688	12	31				146744	6
N1:147030	chr01	146957	147103	+21:YAL002W;	3.24589	6	86.25	44.268	147021	454	35	147023	135	32				147024	64	33	147022	108	38	147028	84	30	147018	62	33	147082	9	32	147017	4	27				147020	3	3	147047	13	24	147092	3	12	147024	6
N1:147247	chr01	147174	147320	+22:YAL002W;	2.60465	5	66	38.566													147176	30	38	147248	41	42	147250	40	45	147271	2	29	147245	3	32													147202	3
N1:147442	chr01	147369	147515	+23*:YAL002W;	4.41781	6	100	15.69	147443	234	26	147419	73	29	147444	37	30	147417	26	30	147415	37	32	147445	42	31	147448	74	27	147453	10	34	147416	8	29	147433	1	0	147452	5	28	147422	23	33	147458	3	7	147484	3
N1:147676	chr01	147603	147749		2.42138	4	89.5	20.817	147631	104	40	147695	70	42	147689	31	36	147686	23	35	147706	36	40	147619	5	49	147689	33	32	147731	8	25	147641	1	0							147709	14	40	147729	7	24
N1:147837	chr01	147764	147910	+20*:YAL001C;	4.24884	6	100	24.938	147853	419	31	147856	113	33	147851	61	39	147860	61	36	147862	87	41	147880	72	39				147904	8	32	147834	4	16	147800	5	27	147850	6	11	147861	20	45				147847	6
N1:148010	chr01	147937	148083	+19:YAL001C;	3.44361	6	91.75	31.413				148066	74	34										148047	55	44	147976	46	30																			148069	5
N1:148171	chr01	148098	148244	+18:YAL001C;	1.79005	2	89	11.314							148169	70	37	148130	49	38	148191	83	41				148152	32	37	148128	2	2	148150	2	29	148118	1	0				148125	8	34	148136	6	7
N1:148328	chr01	148255	148401	+17:YAL001C;	5.51326	6	100	7.714	148330	408	34	148332	154	29	148338	56	40	148308	78	39							148338	24	42	148320	8	16	148343	5	20	148326	6	12	148350	4	7	148317	15	39	148336	2	11	148311	3
N1:148498	chr01	148425	148571	+16:YAL001C;	3.99171	6	84	17.885													148445	29	39	148442	28	31				148516	2	26	148534	3	14
N1:148694	chr01	148621	148767	+15:YAL001C;	3.22449	5	99.67	41.97	148640	569	35	148639	151	34				148643	84	35	148636	107	38				148640	43	25	148691	3	24	148719	3	17	148693	3	30				148657	8	28	148631	12	25	148624	4
N1:149043	chr01	148970	149116	+13:YAL001C;	2.11708	5	100	33.605	149028	512	37	148971	158	32	148977	90	34	149019	76	37	148973	126	32	148972	79	35	148970	60	35	148972	4	32	149038	5	32	148975	1	0	149093	4	30				148989	13	26
N1:149215	chr01	149142	149288	+12:YAL001C;	5.15559	6	89.5	10.577	149202	381	35																									149274	5	23				149222	7	21				149142	1
N1:149384	chr01	149311	149457	+11:YAL001C;	2.79309	3	100	7.937							149312	73	41										149326	42	33				149340	7	36													149332	7
N1:149544	chr01	149471	149617	+10:YAL001C;	3.29126	4	60	12.527	149535	669	30	149532	104	32	149500	122	34	149506	77	34	149480	123	40	149539	110	36	149531	48	27	149540	14	36	149499	7	25	149478	20	38	149491	6	24	149489	29	39	149480	6	50	149533	10
N1:149742	chr01	149669	149815	+9:YAL001C;	2.87147	5	100	25.528				149763	91	36				149765	58	41	149761	54	34	149750	71	42	149762	35	38	149769	6	18										149732	13	33				149766	5
N1:150025	chr01	149952	150098	+7:YAL001C;	2.90916	4	83.5	21.37	149989	394	29	149986	95	34				149982	46	31	150004	61	31	149987	48	28	149995	20	30													150022	6	23	150005	5	23	149978	12
N1:150186	chr01	150113	150259	+6:YAL001C;	4.82808	6	100	23.478				150249	158	38	150147	68	36							150172	48	27				150119	12	21	150126	2	0				150181	1	0	150172	10	14	150170	13	29	150134	6
N1:150500	chr01	150427	150573	+4:YAL001C;	2.49662	4	50.5	28.941	150484	226	32				150510	32	32	150501	42	38	150482	24	36				150443	20	44				150487	3	29	150437	5	28							150484	12	25
N1:150670	chr01	150597	150743	+3:YAL001C;	3.64124	6	86.75	23.464	150666	324	30	150620	81	31	150672	73	34	150657	50	34	150666	76	32	150621	52	29	150629	52	31	150610	7	19							150616	8	25	150625	25	27	150665	56	25	150627	60
N1:150977	chr01	150904	151050	+1:YAL001C;	3.62092	4	78	9.11	150974	335	23	150978	108	24	150968	32	29	150974	58	22	150969	48	24	150974	46	24	150973	77	27	150969	10	25	150972	11	23	150978	6	12	150967	9	7	150965	16	24	150973	81	16	150974	141
N1:151149	chr01	151076	151222	-1:YAL001C;	5.26186	6	100	9.839	151153	266	18	151152	93	22	151145	42	19	151147	40	15	151151	48	24	151147	44	17	151150	142	20	151137	40	14	151137	25	23	151138	31	16	151145	23	17	151141	129	16	151150	77	17	151148	159
N1:151376	chr01	151303	151449		1.9614	3	43	22.605	151375	81	24	151369	34	24	151374	10	21	151370	16	30	151378	16	31	151375	16	21	151378	39	29	151314	4	27	151355	1	0	151382	1	0	151366	4	26	151375	11	39	151326	2	10	151378	10
N1:151535	chr01	151462	151608		2	2	-1	0																151522	1	0
N1:151846	chr01	151773	151919	+2:CUT441;	4.68756	5	93	6.95																						151852	4	2							151856	6	13	151850	13	26	151855	26	17
N1:152058	chr01	151985	152131	0:CUT441; -1:YAR002W;	1.01687	3	83.5	37.207	151994	201	19	151987	83	24	151997	31	24	152001	33	27	151997	52	29	151995	36	23	151994	99	23	152066	27	20	152067	12	19	152069	19	24	152070	6	5	152001	7	35				151999	69
N1:152261	chr01	152188	152334	-1:CUT441; +1:YAR002W;	5.72039	6	100	5.845	152258	932	14	152260	295	15	152262	144	16	152261	148	12	152262	173	14	152260	159	13	152257	784	11	152261	88	13	152257	44	13	152260	29	10	152266	21	10	152269	168	16	152258	423	13	152258	775
N1:152430	chr01	152357	152503	+2:YAR002W;	5.58539	6	90.25	7.23	152430	203	26	152434	60	26	152431	51	27	152437	24	26	152437	32	29	152440	28	25	152434	61	30	152431	20	20	152431	6	9	152443	5	11	152427	3	8	152439	17	22	152436	64	24	152435	109
N1:152588	chr01	152515	152661	+3:YAR002W;	5.65731	6	90	6.585	152598	341	26	152607	112	31	152602	50	26	152610	50	21	152605	51	29	152610	57	27	152599	65	27				152621	5	26	152620	10	16	152616	16	28	152606	27	20	152604	107	25	152600	156
N1:152763	chr01	152690	152836	+4:YAR002W;	5.73045	6	100	5.707	152769	411	27	152780	111	24	152769	77	26	152777	57	27	152774	67	26	152779	64	26	152765	60	26	152807	25	26				152805	11	30	152767	9	26	152775	31	23	152771	117	25	152777	84
N1:152926	chr01	152853	152999	+5:YAR002W;	4.67374	6	100	19.604	152931	428	29	152979	158	32	152933	82	27	152930	63	29	152934	96	31	152934	78	31	152929	54	28	152982	14	47	152922	11	24				152920	10	44	152937	33	21	152932	95	24	152934	39
N1:153087	chr01	153014	153160	+6:YAR002W;	4.34931	5	100	10.286	153090	414	33				153087	72	32	153101	54	31	153097	74	36	153094	67	33	153088	47	36							153096	10	24	153076	10	39	153094	29	36	153091	46	28	153094	27
N1:153253	chr01	153180	153326	+7:YAR002W;	3.71624	4	100	33.199	153258	725	26	153262	175	30	153260	108	30	153261	88	37	153262	129	32	153260	108	27	153259	84	27	153249	14	40	153261	11	36	153263	16	27	153277	8	33	153255	62	28	153261	58	19	153264	17
N1:153408	chr01	153335	153481	+8:YAR002W;	4.37684	6	93.75	16.269	153423	644	27	153437	180	30	153434	92	29	153434	73	29	153439	115	32	153423	103	24	153424	90	26	153428	16	19	153447	6	46				153451	8	29	153424	64	33	153424	19	20	153428	14
N1:153584	chr01	153511	153657	+9:YAR002W;	4.59814	6	83	16.553	153583	338	36	153594	119	34	153591	49	37	153591	46	34	153592	68	34	153593	65	30	153585	40	44							153569	9	38				153581	56	32				153605	4
N1:153802	chr01	153729	153875	+10:YAR002W;	2.97498	6	99	26.621	153753	341	34	153765	111	29	153756	70	34	153761	63	33	153758	65	31	153758	51	35	153754	68	30	153762	17	31				153769	7	18	153767	5	24	153791	33	34	153756	18	26	153755	8
N1:153955	chr01	153882	154028	+11*:YAR002W;	2.14975	3	56	19.287	153927	240	40	153932	70	34	153940	34	36				153930	56	30				153990	36	40	153933	11	27							153979	1	0	153953	14	37
N1:154175	chr01	154102	154248	+4:YAR002C-A;	3.95176	6	99.25	41.849	154226	274	30	154221	135	31	154226	70	31	154224	47	41	154231	77	27	154221	59	30	154167	98	42	154227	8	18	154217	13	21	154225	10	22	154148	6	32	154215	65	29	154226	63	24	154224	56
N1:154384	chr01	154311	154457	+3:YAR002C-A;	5.56893	6	100	7.278	154374	515	24	154382	144	24	154380	81	22	154376	55	29	154385	64	26	154374	85	21	154373	128	28	154379	5	18	154379	24	30	154384	16	23	154378	14	33	154371	54	22	154376	164	22	154382	188
N1:154553	chr01	154480	154626	+2:YAR002C-A;	5.11201	6	100	10.746	154550	542	20	154562	185	19	154551	93	21	154546	88	22	154552	96	29	154544	83	23	154555	194	19				154559	15	15	154552	25	12	154551	12	20	154548	48	27	154552	306	18	154554	347
N1:154720	chr01	154647	154793	+1:YAR002C-A; -1:YAR003W;	5.45828	6	99.25	8.43	154721	411	21	154714	210	18	154718	70	21	154713	69	22	154716	110	19	154713	101	15	154717	190	21	154710	33	18	154717	16	26	154714	17	16	154711	18	18	154713	54	15	154720	75	22	154720	205
N1:154993	chr01	154920	155066	-1:YAR002C-A; +1:YAR003W;	5.44658	6	100	8.758	154996	544	12	154993	149	16	154994	93	17	154993	86	12	154996	77	14	154994	103	10	154995	512	11	154992	38	13	154993	52	10	154996	71	12	154995	102	7	154993	131	13	154995	420	9	154994	351
N1:155148	chr01	155075	155221	+2:YAR003W;	5.8532	6	100	4.167	155146	366	21	155144	154	20	155148	91	27	155149	70	18	155143	71	21	155148	96	16	155150	171	20	155154	11	22	155150	28	13	155148	22	16	155146	29	9	155153	125	18	155148	266	18	155147	417
N1:155313	chr01	155240	155386	+3:YAR003W;	5.80297	6	100	4.885	155322	433	19	155322	137	18	155320	73	19	155327	83	23	155330	76	17	155319	57	23	155328	152	18	155326	4	13	155323	9	13	155315	12	15	155312	9	18	155319	74	18	155323	133	15	155319	177
N1:155478	chr01	155405	155551	+4:YAR003W;	4.88686	6	100	13.115	155478	440	24	155477	114	29	155469	89	28							155469	70	25				155479	8	20				155469	11	17	155475	9	21	155479	60	22	155473	134	22	155471	123
N1:155642	chr01	155569	155715	+5:YAR003W;	3.50226	4	56	10.72	155642	569	25	155648	178	26	155640	91	24	155642	104	27	155638	96	27	155641	88	21	155648	94	26	155647	7	22	155631	7	12	155645	16	35	155646	10	28	155633	10	10	155637	64	17	155641	50
N1:155808	chr01	155735	155881	+6:YAR003W;	4.28959	5	93	11.113	155811	383	31	155812	119	34	155811	88	28	155811	68	30	155810	62	31	155809	63	27	155815	74	39	155815	12	24	155791	2	16	155811	7	10	155807	5	14	155812	29	23	155810	45	19	155815	29
N1:155970	chr01	155897	156043	+7:YAR003W;	3.40714	5	100	22.287	155966	291	38	155963	83	37	155962	49	30				155962	43	34	155963	31	33				156040	2	28										155966	34	25	155968	26	30	155978	6
N1:156133	chr01	156060	156206	+8:YAR003W;	4.1313	5	100	12.104	156132	930	26	156138	239	33	156133	158	31	156126	133	32	156120	151	34	156128	130	21	156115	199	29				156115	18	23	156106	17	24	156099	12	27	156133	91	25	156129	51	24	156129	12
N1:156297	chr01	156224	156370	+9:YAR003W;	3.86051	5	96.33	15.222	156300	455	29	156302	113	34	156299	58	25	156302	59	30	156349	72	40	156302	76	20	156293	52	26	156301	9	21	156267	4	10	156292	8	18	156305	6	34	156292	19	27	156292	15	28	156294	4
N1:156486	chr01	156413	156559	+10*:YAR003W;	4.27593	5	91.75	11.992	156483	511	26	156487	149	28	156486	69	26	156493	73	28				156483	88	29	156483	40	28	156480	16	18	156491	4	42	156483	9	10	156468	5	15	156490	26	19	156491	14	13	156486	8
N1:156643	chr01	156570	156716		4.84091	5	100	4.868	156636	416	27	156634	124	28				156650	41	36	156630	68	32	156639	61	25	156635	44	30	156632	6	10	156673	1	0	156641	8	15	156644	9	24	156645	15	33				156652	3
N1:156812	chr01	156739	156885	+12*:YAR007C;	4.80394	5	100	16.848	156798	437	29	156815	145	27	156820	85	39	156830	82	40				156825	66	34	156815	75	32	156819	4	14	156830	8	34	156818	3	30	156832	7	26	156824	28	33	156812	4	17	156834	6
N1:156980	chr01	156907	157053	+11:YAR007C;	4.02443	5	61.33	12.853	156980	597	39	156972	130	31	156977	94	42	156997	76	36	156981	100	39	157000	88	31				157005	11	21	156982	5	17	157016	6	16	157003	2	2	156981	26	40	156979	11	25	157009	3
N1:157141	chr01	157068	157214	+10:YAR007C;	2.53999	4	100	19.363	157156	857	32	157128	312	30	157152	115	32	157160	111	33	157138	110	38	157162	143	29	157128	104	31	157156	5	21	157165	2	21				157170	6	32	157134	26	37	157149	8	24	157166	4
N1:157317	chr01	157244	157390	+9:YAR007C;	2.97154	4	100	31.92	157312	601	28	157308	171	26	157313	102	31	157317	61	33	157324	107	32	157315	114	28	157307	97	27	157307	8	25	157314	3	17	157299	5	23				157317	28	27	157310	18	33	157316	9
N1:157488	chr01	157415	157561	+8:YAR007C;	4.63593	5	95	7.596	157487	544	24	157481	234	26	157490	80	28	157492	76	24	157487	84	26	157486	127	19	157483	68	31	157494	4	29	157498	8	17	157488	1	0	157505	7	21	157483	32	23	157491	23	17	157483	8
N1:157645	chr01	157572	157718	+7:YAR007C;	4.70167	5	81.67	6.782	157656	671	26	157656	172	27	157659	98	27	157661	91	15	157664	81	25	157662	84	22	157660	66	28	157663	3	14	157662	7	15	157660	5	11	157661	4	29	157650	21	33				157658	10
N1:157823	chr01	157750	157896	+6:YAR007C;	4.49237	5	93	8.927	157814	499	24	157810	134	25	157811	74	29	157816	65	31	157819	99	29	157818	63	24	157816	41	24	157822	5	5	157818	7	24				157818	5	8	157823	11	18	157801	26	26
N1:157982	chr01	157909	158055	+5:YAR007C;	4.91801	5	100	3.435	157979	673	23	157973	141	23	157982	82	25	157980	62	23	157975	91	29	157978	76	22	157977	60	20	157989	6	11				157970	2	3	157984	6	12	157971	13	17	157973	69	18	157979	44
N1:158139	chr01	158066	158212	+4:YAR007C;	4.40975	5	100	9.659	158141	336	23	158137	102	24	158140	67	28				158142	64	33	158141	44	24	158147	62	25	158145	3	6	158136	10	23	158140	5	20				158131	23	30	158139	58	20	158150	47
N1:158305	chr01	158232	158378	+3:YAR007C;	5.68933	6	100	6.164	158300	613	16	158300	168	15	158305	63	22	158305	78	22	158304	108	18	158300	81	17	158298	73	17	158297	11	7	158297	10	26	158302	10	10	158306	9	7	158298	36	18	158304	154	14	158305	147
N1:158473	chr01	158400	158546	+2:YAR007C;	5.67633	6	86.5	6.314	158479	410	19	158481	117	25	158479	65	27	158480	39	26	158479	37	19	158481	52	20	158479	92	17				158479	13	15	158473	11	9	158478	9	6	158472	40	22	158479	185	12	158479	363
N1:158641	chr01	158568	158714	-1:YAR008W; +1:YAR007C;	5.97242	6	100	1.751	158637	609	18	158639	168	20	158638	88	19	158639	59	22	158638	64	17	158636	92	16	158637	114	14	158639	18	11	158636	22	22	158637	23	19	158639	17	13	158637	44	19	158638	116	17	158643	312
N1:158911	chr01	158838	158984	+1:YAR008W; -1:YAR007C;	5.54687	6	100	7.633	158917	600	18	158915	212	18	158918	106	18	158918	102	16	158916	104	16	158920	118	16	158920	214	14	158936	13	36	158921	34	13	158916	20	13	158919	20	14	158918	66	15	158919	208	14	158917	338
N1:159078	chr01	159005	159151	+2:YAR008W;	5.52117	6	100	7.662	159072	525	22	159071	168	21	159073	79	25	159069	55	22	159072	89	20	159074	71	20	159079	91	26	159094	9	21	159082	21	17	159063	7	12				159073	56	23	159072	124	19	159078	158
N1:159237	chr01	159164	159310	+3:YAR008W;	3.8429	5	65	21.23	159231	295	31	159231	76	29	159237	51	34	159239	48	28	159239	45	29	159240	41	26	159235	56	28				159237	4	10	159231	4	12				159254	14	28	159232	37	25	159231	37
N1:159396	chr01	159323	159469	+4:YAR008W;	4.6634	5	100	21.587	159385	359	34	159390	114	36	159393	52	35	159392	57	36	159390	70	30	159391	49	34				159424	2	16	159390	5	36	159410	4	4	159384	2	31							159391	10
N1:159726	chr01	159653	159799	+6*:YAR008W;	3.203	5	100	19.506	159674	762	24	159681	220	31	159677	104	32	159671	66	33	159688	109	27	159694	89	29	159672	99	26	159741	2	7	159677	12	12				159700	3	14	159697	49	27				159680	22
N1:160024	chr01	159951	160097		2.79946	4	100	36.56	160059	212	33	160034	113	29	160035	38	32	160030	46	29	160030	61	23	160030	61	17	160049	94	27	160038	10	14	160037	13	26	160037	15	35				160030	20	22	160073	6	31	160064	4
N1:160178	chr01	160105	160251		1.01456	3	100	53.507							160188	37	23	160186	44	16	160187	46	24	160189	52	18	160212	68	23	160212	9	18	160185	8	20	160213	1	0	160180	5	15	160189	18	15				160220	2
N1:160444	chr01	160371	160517		2.05127	3	100	20.664
N1:160707	chr01	160634	160780		1.79018	3	100	42.332
N1:160923	chr01	160850	160996		1.31884	2	100	21.92
N1:161118	chr01	161045	161191		1.99925	3	100	22.338
N1:161301	chr01	161228	161374		2.08048	4	50	30.254
N1:161480	chr01	161407	161553		1.00004	1	-2	0
N1:161673	chr01	161600	161746		2.02302	3	100	21.939
N1:161936	chr01	161863	162009		1.42411	2	100	19.799
N1:162224	chr01	162151	162297		2.00596	3	100	30.892
N1:162419	chr01	162346	162492		1.15581	3	100	42.665
N1:162618	chr01	162545	162691		2.81189	3	100	7.55
N1:162771	chr01	162698	162844		2.76234	3	100	8.544
N1:162994	chr01	162921	163067		1.42415	3	100	44.411
N1:163159	chr01	163086	163232		1.99169	3	100	39.577
N1:163329	chr01	163256	163402		1.4611	3	100	36.373
N1:163544	chr01	163471	163617		2.32389	3	100	15.948
N1:163698	chr01	163625	163771		1.83719	2	-1	9.899																									163703	1	0
N1:163966	chr01	163893	164039		2.0245	4	50	28.088	163970	6	14										163982	1	0																			164026	1	0
N1:164162	chr01	164089	164235		1.04741	2	100	30.406																															164100	1	0
N1:164322	chr01	164249	164395		1.17988	3	100	46.436
N1:164474	chr01	164401	164547		2.31807	3	100	15.524
N1:164627	chr01	164554	164700		2.28796	3	100	16.442
N1:164812	chr01	164739	164885		1.5917	3	100	53.093
N1:165025	chr01	164952	165098		2.27143	3	100	16.503
N1:165213	chr01	165140	165286		1.02384	2	100	33.234
N1:165400	chr01	165327	165473		2.10249	3	100	21.385
N1:165556	chr01	165483	165629		1.81602	3	100	35.162
N1:165722	chr01	165649	165795		1.99656	2	100	1.414
N1:166036	chr01	165963	166109		2.02007	3	100	24.434
N1:166282	chr01	166209	166355		4.83165	5	100	4.98							166286	5	8	166290	6	29	166292	6	32	166291	1	0
N1:166464	chr01	166391	166537		4.24804	6	100	25.585	166493	539	27	166443	224	19	166453	111	23	166444	101	23	166447	102	20	166447	98	18	166492	134	28	166442	29	13	166444	9	19	166445	14	17	166432	6	16	166441	109	18	166444	20	23	166443	8
N1:166661	chr01	166588	166734		1.86232	3	23	24.44	166660	378	26	166655	52	39	166656	30	20	166661	39	35	166656	29	35	166598	25	36	166663	32	25				166593	3	28
N1:166832	chr01	166759	166905		4.90078	6	100	12.209	166825	603	30	166811	146	31	166816	83	30	166815	76	28	166810	81	30	166770	76	31	166824	69	36	166899	5	26	166764	8	30	166777	4	26	166823	1	0	166775	16	28	166841	13	22	166809	9
N1:167014	chr01	166941	167087	+13*:YAR014C;	3.19359	6	98.25	27.223	167050	529	32	167066	166	32	167051	85	38	166971	70	31	167067	92	34	167053	93	33	167042	45	33	167065	13	21	167080	24	21	167046	14	40	166972	8	22	166973	18	36				166974	14
N1:167221	chr01	167148	167294	+12:YAR014C;	2.66441	5	85.33	26.79	167210	850	26	167222	171	36	167213	105	33	167220	84	34	167220	97	42	167220	143	27	167212	81	27	167220	6	44							167290	5	35	167225	12	18	167177	18	22	167215	12
N1:167381	chr01	167308	167454	+11:YAR014C;	2.59733	5	100	27.254				167403	126	43				167406	43	49				167378	64	34				167421	10	30				167311	1	0				167392	17	37
N1:167662	chr01	167589	167735	+9:YAR014C;	3.50282	5	78.25	30.466	167657	953	27	167615	223	31	167649	185	27	167650	135	32	167643	150	29	167659	155	32	167651	64	29				167653	7	22	167655	15	22	167631	12	21	167626	37	35	167653	33	19
N1:167828	chr01	167755	167901	+8:YAR014C;	4.7042	6	99.25	13.925	167815	938	28	167787	274	27				167800	114	29	167805	157	28				167802	63	34	167789	14	16	167821	11	20				167819	5	22	167800	22	31	167810	34	28	167794	15
N1:167985	chr01	167912	168058	+7:YAR014C;	4.24081	5	100	12.837	167970	928	24	167954	294	24	167973	134	29	167971	121	24	167969	157	19	167967	134	25	167965	56	32	167969	7	25				167958	8	7	167967	11	24	167972	26	30	167977	59	21	167967	16
N1:168165	chr01	168092	168238	+6:YAR014C;	3.63589	5	89	15.726	168154	482	30	168125	136	32	168126	69	31	168154	71	33	168126	93	29	168137	68	34	168149	43	34				168167	2	12	168144	5	30	168126	3	34				168137	28	26	168123	22
N1:168320	chr01	168247	168393	+5:YAR014C;	3.81117	4	100	6.185	168320	453	23	168290	126	27	168316	64	29	168314	61	25	168315	106	22	168319	59	27	168320	35	32	168283	6	40				168307	6	27	168324	5	20	168304	32	21	168326	54	23	168285	33
N1:168479	chr01	168406	168552	+4:YAR014C;	5.89146	6	97.75	3.578	168481	451	23	168470	115	25	168478	85	22	168477	76	21	168484	62	24	168483	58	22	168483	53	23	168470	4	25	168477	7	30	168484	6	13				168482	29	27	168484	130	19	168478	91
N1:168635	chr01	168562	168708	+3:YAR014C;	5.73312	6	100	5.707	168638	258	26	168637	64	20	168639	56	27	168636	28	24	168642	38	28	168639	28	31	168632	47	24				168636	5	20	168643	5	9	168621	5	11	168635	18	26				168634	106
N1:168793	chr01	168720	168866	+2:YAR014C;	5.31367	6	76.75	9.368	168807	287	22	168802	94	20	168804	73	24	168807	59	18	168809	49	17	168811	55	24	168808	72	24	168786	11	23	168809	10	17	168808	8	10	168801	7	20	168800	52	22	168808	150	16	168800	220
N1:168972	chr01	168899	169045	+1:YAR014C;	5.89793	6	100	3.45	168975	548	20	168977	134	18	168975	108	17	168974	92	18	168978	106	20	168978	117	17	168978	282	16	168967	34	15	168974	27	16	168974	13	12	168979	19	14	168978	80	19	168977	188	15	168976	402
N1:169270	chr01	169197	169343	+1:YAR015W; -1:YAR014C;	2.91348	3	61	5.033							169265	23	25	169270	23	27										169327	80	37				169264	6	5	169259	5	14				169223	12	28
N1:169433	chr01	169360	169506	+2:YAR015W;	5.61757	6	100	6.802	169434	551	25	169438	222	20	169433	111	23	169440	80	24	169424	90	23	169444	94	21	169438	192	25				169442	21	15	169415	10	31	169417	8	25	169445	98	22	169441	278	19	169441	454
N1:169601	chr01	169528	169674	+3:YAR015W;	5.46649	6	100	8.165	169603	528	25	169597	164	24	169606	104	24	169595	70	23	169589	100	27	169605	80	22	169603	136	24	169635	15	27				169602	28	19	169606	10	14	169594	48	22	169605	183	22	169598	198
N1:169911	chr01	169838	169984	+5:YAR015W;	4.4404	5	96	10.134	169927	766	22	169922	195	22	169927	141	24	169918	91	24	169916	142	23	169910	123	24	169931	114	24	169915	11	26	169913	21	15	169909	21	18	169929	3	11	169924	42	25	169931	73	19	169914	37
N1:170103	chr01	170030	170176	+6:YAR015W;	3.01417	5	100	24.57	170106	437	30							170108	60	33	170076	81	29				170126	74	36	170113	7	26	170077	8	22										170112	29	30	170096	8
N1:170371	chr01	170298	170444	+8*:YAR015W; -1:CUT004;	1.68376	3	83.5	36.056	170397	255	38	170375	70	44	170362	34	29	170365	39	28	170380	38	36	170383	41	37	170373	23	38	170381	5	5	170384	4	34	170363	5	35							170367	8	20	170374	11
N1:170551	chr01	170478	170624	+1:CUT004; +8*:YAR018C;	3.21597	6	97.25	28.923	170554	503	32	170550	205	31	170538	88	31	170546	92	31	170544	133	29	170546	108	29	170553	110	37	170548	14	19	170534	9	18	170555	16	26				170538	45	30	170546	18	30	170542	27
N1:170700	chr01	170627	170773	+2:CUT004; +7:YAR018C;	3.71713	6	100	21.554	170713	550	32	170714	157	35	170715	94	32	170707	78	31	170714	79	33	170708	77	28	170715	138	29	170715	39	24	170704	14	26	170703	19	30	170710	20	24	170705	25	32	170717	34	34	170712	52
N1:170868	chr01	170795	170941	+3:CUT004; +6:YAR018C;	4.21137	5	100	11.895	170876	678	29	170880	157	28	170869	112	26	170869	99	29	170880	86	32	170877	120	24	170872	180	28	170899	20	33	170875	17	24	170881	23	32	170892	31	27	170879	100	26	170884	83	21	170882	83
N1:171036	chr01	170963	171109	+4:CUT004; +5:YAR018C;	3.22779	5	89	24.11	171048	380	29	171045	120	26	171046	57	23	171048	37	19	171050	41	25	171048	67	29	171048	75	34				171048	3	25	171046	23	33				171046	68	28	171045	33	33	171050	39
N1:171202	chr01	171129	171275	+5:CUT004; +4:YAR018C;	3.2097	4	100	14.245	171216	640	26	171209	212	28	171200	101	27	171206	115	25	171227	84	30	171211	83	25	171222	123	27	171201	17	28	171234	6	31				171158	16	37	171215	51	32	171225	137	25	171211	123
N1:171352	chr01	171279	171425	+6:CUT004; +3:YAR018C;	4.42778	5	100	10.05				171368	59	39	171363	34	36	171371	32	36																171312	7	27	171317	14	23				171381	41	33	171370	43
N1:171527	chr01	171454	171600	+7:CUT004; +2:YAR018C;	5.73524	6	99.25	5.636	171526	449	22	171528	147	23	171529	73	22	171529	78	19	171522	60	27	171532	66	25				171531	9	17	171495	4	24	171537	18	13	171528	10	11	171530	18	13	171529	144	15	171531	282
N1:171690	chr01	171617	171763	+8:CUT004; +1:YAR018C;	5.23199	6	100	9.98	171692	342	24	171692	124	23	171697	54	24	171697	48	25	171690	93	32	171699	65	23	171667	109	29	171689	18	23	171678	7	30							171701	30	21	171700	58	27	171699	165
N1:171952	chr01	171879	172025	+10:CUT004; -1:YAR018C;	3.82716	6	77	22.427	171956	215	21	171950	45	26	171954	22	25	171949	22	23	171954	27	37	171949	24	19	171955	29	27	171945	3	32										171897	4	9	171950	1	0	171953	8
N1:172129	chr01	172056	172202	+11:CUT004;	2.93106	4	80.5	17.84	172122	290	26	172120	108	20				172127	44	18	172121	40	27	172119	44	23				172106	3	29				172119	1	0	172101	3	20							172128	6
N1:172302	chr01	172229	172375	+18*:YAR019C; +12:CUT004;	4.43549	6	100	17.049	172281	465	30	172275	182	24	172278	65	34	172287	59	27	172275	95	31	172280	72	20	172269	96	38				172283	5	8	172303	6	26	172269	13	24	172265	18	31	172273	11	20	172278	6
N1:172520	chr01	172447	172593	+17:YAR019C;	3.75837	6	91.75	34.135	172457	535	34	172577	134	31	172517	123	39	172582	84	43	172455	85	37	172581	78	28	172516	82	42				172459	6	34	172512	1	0	172485	8	27	172591	8	32	172575	10	29	172580	4
N1:172685	chr01	172612	172758	+16:YAR019C;	2.79406	5	82	25.09	172648	416	41										172645	58	46				172730	27	46				172648	1	0
N1:172868	chr01	172795	172941	+15:YAR019C;	3.59119	6	100	26.385	172830	618	32	172876	125	38	172836	105	31	172836	99	31	172822	92	34	172882	68	37	172887	55	40	172892	1	0	172834	6	18				172818	5	21	172864	17	29	172835	11	23	172860	2
N1:173037	chr01	172964	173110	+14:YAR019C;	5.62708	6	100	6.782	173036	498	35	173040	166	33	173034	112	33	173031	60	30	173044	103	37	173038	68	33	173037	60	35	173043	5	3	173025	4	17	173046	3	14	173045	4	8	173072	13	26
N1:173200	chr01	173127	173273	+13:YAR019C;	2.64833	4	67	26.043	173192	617	39	173190	144	47				173190	93	42				173202	70	38	173191	63	44	173221	6	52	173218	7	21				173219	4	39				173139	10	38
N1:173485	chr01	173412	173558	+11:YAR019C;	2.70995	3	98.5	9.504							173488	76	35																									173492	12	35	173420	17	40
N1:173666	chr01	173593	173739	+10:YAR019C;	5.01429	6	100	17.337	173647	551	32				173658	74	33	173658	69	36				173673	72	31				173703	5	24	173639	10	9				173637	2	14	173663	8	27	173600	4	23	173736	7
N1:173948	chr01	173875	174021	+8:YAR019C;	2.84794	6	95	36.119	173971	643	31				173982	148	32	173982	92	37	173981	125	35	173971	112	30	173976	105	33	173960	9	25	173961	8	34	173940	9	17				173978	25	31	173963	21	30	173955	11
N1:174134	chr01	174061	174207	+7:YAR019C;	3.33839	5	71	24.643	174135	352	31	174067	165	37	174136	77	39							174135	52	32				174108	7	26	174147	5	18	174093	3	23	174128	5	40	174126	26	27	174130	10	30	174123	4
N1:174298	chr01	174225	174371	+6:YAR019C;	5.39961	6	100	9.136	174297	1057	18	174299	195	22	174301	179	17	174298	135	15	174299	166	18	174298	158	12	174298	181	19	174299	30	13	174300	27	13	174300	45	16	174303	36	17	174296	46	22	174299	66	13	174301	33
N1:174467	chr01	174394	174540	+5:YAR019C;	3.74169	4	85	7.257	174465	558	23				174470	103	21	174465	79	25	174464	82	25	174466	92	17	174465	120	29	174463	22	31	174466	17	15	174462	26	29	174457	21	26	174465	53	27	174463	52	15
N1:174617	chr01	174544	174690	+4:YAR019C;	3.4599	4	100	11.165	174615	597	27	174604	200	26	174617	87	27	174615	73	28	174612	89	25	174621	100	34	174615	117	32	174632	10	23	174619	29	17	174618	38	28	174617	23	39	174620	86	30	174612	106	19	174612	102
N1:174781	chr01	174708	174854	+3:YAR019C;	5.26873	6	100	10.187	174787	710	20	174781	254	25	174789	128	23	174781	88	23	174799	92	21	174784	93	22	174781	193	22				174780	40	18	174768	57	26	174780	50	25	174775	56	21	174781	228	17	174782	242
N1:174964	chr01	174891	175037	+2:YAR019C;	4.5969	6	94.5	18.588	174962	279	24	174960	69	28	174959	46	30	174959	20	24	174977	46	32	174945	52	22	174965	78	27	174929	41	24	174949	16	24	174956	13	15				174943	27	22	174960	63	24	174953	101
N1:175127	chr01	175054	175200	+1:YAR019C;	5.79433	6	100	4.93	175129	482	20	175127	166	22	175130	75	25	175128	74	21	175127	84	22	175129	87	20	175130	310	19	175113	218	16	175123	89	17	175126	76	14	175123	66	19	175121	199	17	175130	217	14	175129	406
N1:175340	chr01	175267	175413	-1:YAR019C;	5.01148	6	99.5	11.622	175338	280	27	175330	121	28	175356	45	23	175356	38	26	175349	50	24	175332	54	29	175336	251	22	175325	64	30	175341	27	19	175326	14	20	175370	23	23	175374	102	32	175340	182	22	175329	304
N1:175518	chr01	175445	175591		5.47012	6	100	8.124	175521	655	23	175516	141	27	175517	102	27	175518	61	20	175520	77	29	175515	54	21	175515	235	25	175523	19	25	175506	22	21	175523	15	18	175522	21	17				175518	186	19	175504	283
N1:175679	chr01	175606	175752		5.76604	6	87	5.279	175673	292	26	175671	104	19	175674	43	24	175671	26	20	175672	40	20	175678	29	24	175667	71	19	175675	10	8	175673	6	12							175680	23	20	175667	41	16	175669	85
N1:175851	chr01	175778	175924		5.19427	6	100	10.191	175835	322	28	175843	82	20				175833	29	24	175845	33	23	175842	35	24	175830	57	24							175852	3	4	175846	4	21	175831	4	15	175831	11	25	175825	12
N1:176143	chr01	176070	176216	-1:Unit006;	3.84843	4	26	5.447	176142	142	17	176150	29	12	176142	16	8	176141	14	25				176142	11	22	176144	11	20				176159	1	0										176143	4	4
N1:176400	chr01	176327	176473	+1:Unit006;	4.2127	6	99.25	18.479	176406	431	20	176405	207	20	176399	64	24	176411	40	24	176401	71	26	176374	50	30	176397	103	20	176403	45	22	176381	9	33	176409	22	26	176406	12	22	176397	59	23	176392	6	18	176406	8
N1:176609	chr01	176536	176682	+2*:Unit006;	2.03232	5	85.33	51.843	176604	88	30	176663	40	31	176622	16	29										176671	28	37	176590	3	0							176660	2	9
N1:176837	chr01	176764	176910	+2:YAR020C;	1.68179	2	34	14.142																												176813	2	35										176905	1
N1:176997	chr01	176924	177070	+1:YAR020C;	2.45858	5	72	34.739	176930	52	31	176993	28	42	176927	10	6	176931	5	26	176999	9	39	176998	3	29	176927	10	12	177005	3	20
N1:177220	chr01	177147	177293	0:YAR020C;	2.44555	5	88.67	31.665				177200	101	33							177217	47	38	177204	54	34				177244	18	42	177264	5	11				177248	6	39	177221	47	30	177167	3	16	177232	5
N1:177394	chr01	177321	177467	-1:YAR020C;	3.36976	4	89	12.193	177395	379	33	177386	157	34	177394	59	35	177396	62	35	177390	62	34	177393	64	27	177389	80	35	177411	16	36	177449	7	29	177389	4	11				177399	44	35	177461	8	25	177382	4
N1:177598	chr01	177525	177671		4.44724	6	100	22.115	177651	534	36	177586	150	40	177590	109	36	177590	95	35	177651	79	31	177583	82	41	177585	104	38	177595	21	20	177631	14	31	177584	12	42	177657	10	22	177580	34	32	177658	11	32	177535	7
N1:177792	chr01	177719	177865		2.78446	5	89	40.008	177823	457	35	177815	136	38	177825	83	31	177828	93	35	177823	79	34	177830	67	41	177822	70	34	177749	6	40				177748	1	0				177755	33	40	177826	7	41	177822	5
N1:177993	chr01	177920	178066		2.01818	6	98.25	49.836							177995	72	42							178008	70	41										178049	9	25										178007	2
N1:178222	chr01	178149	178295		2.7041	6	99.25	37.276	178152	685	36	178219	184	37	178153	120	35	178161	121	37	178155	140	41	178160	123	35	178154	82	37							178269	11	20										178196	8
N1:178416	chr01	178343	178489		4.7658	6	96.5	13.069				178413	99	34							178430	70	37	178423	38	41	178378	61	39	178373	6	32	178370	2	10	178439	6	27	178371	5	34				178430	13	26	178345	2
N1:178572	chr01	178499	178645		5.02551	6	100	11.776	178587	739	25	178578	162	26	178587	105	29	178577	99	30	178582	118	24	178584	79	29	178582	92	27	178575	8	11	178565	7	37							178582	18	29	178585	24	13	178574	7
N1:178742	chr01	178669	178815		4.44305	6	95.5	15.807	178753	612	29	178750	144	33	178754	95	28	178758	89	31	178758	100	27	178760	75	32	178754	99	25	178752	5	23	178768	6	21	178767	12	21	178733	3	2	178755	25	27	178754	32	18	178763	9
N1:178898	chr01	178825	178971		3.39969	4	79.5	11.776	178908	399	34	178918	114	32	178912	72	33	178920	72	32	178911	61	30	178916	54	32	178916	52	30	178916	11	27	178937	5	26										178905	13	18	178921	16
N1:179078	chr01	179005	179151	+6*:YAR023C;	5.67265	6	100	6.274	179072	433	29	179079	171	25	179084	82	25	179090	71	28	179073	73	30	179080	70	27	179070	94	28							179064	4	25				179053	29	32	179077	35	28	179081	16
N1:179234	chr01	179161	179307	+5:YAR023C;	2.87577	3	100	6.083	179239	345	21	179239	99	24	179242	48	28	179239	56	17	179238	60	23	179239	30	12	179242	108	17	179238	8	23	179197	4	44	179237	9	25				179246	27	22	179239	35	17	179243	27
N1:179390	chr01	179317	179463	+4:YAR023C;	4.52399	6	99.25	18.841	179395	574	26	179389	188	26	179399	88	27	179395	79	28	179392	88	26	179394	82	28	179395	173	25	179390	14	26	179378	5	25	179394	13	23	179386	15	22	179396	96	25	179397	81	21	179391	79
N1:179559	chr01	179486	179632	+3:YAR023C;	4.57839	5	100	8.276	179547	230	35	179545	125	31	179556	42	34	179577	34	36	179546	43	33	179542	38	35	179559	80	31	179560	17	16	179538	7	28	179551	8	27	179553	8	29	179567	22	38	179545	48	33	179540	73
N1:179718	chr01	179645	179791	+2:YAR023C;	4.62096	6	100	14.976	179736	701	23	179734	236	25	179731	116	24	179731	98	23	179735	102	20	179730	96	21	179734	406	21	179729	35	28	179732	56	18	179733	38	28	179734	30	23	179730	109	26	179736	259	23	179729	373
N1:179900	chr01	179827	179973	+1:YAR023C;	5.1489	6	87.5	11.005	179902	262	23	179904	88	22	179904	33	21	179898	34	15	179909	45	20	179909	37	16	179901	141	22	179904	25	30	179903	19	16	179901	15	21	179897	20	8	179899	155	23	179901	87	18	179901	152
N1:180082	chr01	180009	180155	-1:CUT005; -1:YAR023C;	3.11436	5	84	21.559	180086	152	30	180089	38	30	180085	14	33	180090	10	33	180085	39	22	180094	23	24	180088	97	27	180093	27	29	180088	12	30	180089	23	29	180090	9	29				180087	39	26	180091	85
N1:180270	chr01	180197	180343	+1:CUT005;	3.38907	4	35.5	11.786	180253	77	31	180244	26	28	180250	13	35	180252	10	31	180251	22	35	180252	15	31	180249	51	31	180258	40	44	180254	5	20				180296	4	22	180269	18	39	180250	9	25	180253	38
N1:180442	chr01	180369	180515	+2*:CUT005;	5.27318	6	100	10.596	180442	247	23	180452	111	26	180446	53	23	180450	48	22	180440	52	22	180450	55	24	180445	340	21	180446	100	25	180451	43	19	180436	31	21	180453	28	14	180450	204	21	180446	107	17	180449	255
N1:180611	chr01	180538	180684		5.43704	6	100	8.542	180619	220	21	180620	77	22	180631	35	33	180624	16	29	180631	43	35	180639	24	20	180622	164	23	180659	41	28	180628	25	21	180628	16	12	180654	8	28	180622	159	23	180628	54	23	180633	93
N1:180792	chr01	180719	180865		2.83786	4	100	17.311	180813	191	21	180814	43	23	180808	37	27	180813	18	28	180813	27	17	180815	31	21	180812	92	25	180815	18	18	180812	22	25	180827	8	26	180802	5	10	180798	28	25	180817	9	24	180807	36
N1:180968	chr01	180895	181041		5.34149	6	92.25	9.579	180987	164	20	180986	32	30	180988	15	24	180975	18	25	180986	28	41	180976	24	30	180991	80	23	180972	45	11	180971	10	26	180977	7	27	180984	16	30	180970	57	17	180992	4	25	180975	37
N1:181143	chr01	181070	181216		2.78983	5	36.33	22.832				181200	5	26							181175	2	9	181153	1	0													181163	1	0
N1:181372	chr01	181299	181445		2.92018	6	83.5	37.824	181392	188	32	181369	89	28	181349	29	30	181332	18	40	181359	43	33	181389	47	32	181389	184	33	181392	62	26	181409	11	27	181334	22	29	181390	13	25	181337	63	40	181363	3	22	181380	69
N1:181557	chr01	181484	181630		4.71267	6	100	14.895	181555	499	30	181550	172	31	181554	79	34	181547	54	27	181544	97	29	181544	93	29	181552	468	29	181551	52	38	181560	54	24	181553	27	30	181552	26	22	181527	165	29	181554	26	33	181547	222
N1:181719	chr01	181646	181792		5.14154	6	100	10.926	181734	307	29	181725	132	27	181718	67	26	181718	43	28	181724	46	26	181715	46	28	181722	283	30	181715	66	23	181715	33	25	181715	31	25	181734	17	29	181711	218	26	181755	17	26	181720	127
N1:181881	chr01	181808	181954		5.31411	6	98	9.368	181883	272	25	181903	101	24	181889	27	30	181900	32	18	181902	42	24	181907	48	26	181892	153	21	181904	41	15	181906	21	19	181900	18	19	181898	5	23	181875	35	21	181911	1	0	181908	60
N1:182057	chr01	181984	182130		5.40795	6	100	8.931	182081	352	24	182074	146	25	182081	68	25	182080	55	22	182073	55	25	182077	50	24	182080	219	22	182077	28	22	182090	32	18	182076	18	17	182074	11	16	182078	94	28	182084	21	25	182075	77
N1:182216	chr01	182143	182289		4.72703	5	100	6.427				182230	137	21	182236	55	22	182234	51	21	182231	53	22	182236	65	20				182224	16	13				182231	24	19	182225	9	11	182231	78	21				182229	44
N1:182401	chr01	182328	182474		4.67808	6	100	14.233	182406	460	28	182410	184	19	182410	65	23	182412	64	18	182411	68	19	182413	72	18	182406	150	28	182414	24	15	182407	8	11	182410	23	8	182416	15	27	182414	47	20	182405	11	28	182414	53
N1:182597	chr01	182524	182670		2.7417	4	30.5	24.418
N1:182750	chr01	182677	182823		2.75258	3	100	8.737
N1:182921	chr01	182848	182994		3.32878	5	72.33	19.912										182926	1	0
N1:183100	chr01	183027	183173		2.72605	3	100	9.238	183070	61	27	183065	18	24	183070	8	21	183074	12	26	183070	19	30	183073	10	37	183071	23	29				183069	1	0				183129	3	4	183077	15	25	183076	7	23	183074	18
N1:183257	chr01	183184	183330		2.89978	4	90.5	16.958	183271	13	17	183269	17	12	183274	1	0				183273	3	0	183276	3	2	183269	6	19													183275	6	35				183271	6
N1:183436	chr01	183363	183509	-1:YAR027W;	2.97487	4	50.5	18.779				183489	3	2	183481	2	2	183376	1	0							183485	3	2	183486	2	0	183370	1	0				183376	1	0	183478	4	10	183489	1	0
N1:183678	chr01	183605	183751	+1:YAR027W;	1.79994	4	70	34.808	183627	4	17										183667	5	26													183727	3	0				183654	6	29	183647	1	0	183630	2
N1:183869	chr01	183796	183942	+2:YAR027W;	3.52497	5	87	17.196	183841	129	34	183841	23	29	183850	31	32	183845	25	27	183841	28	27	183845	30	26	183847	66	27	183807	54	40	183842	7	19	183875	4	50	183842	6	31	183841	43	24	183844	28	21	183844	59
N1:184082	chr01	184009	184155	+3:YAR027W;	2.30405	5	87	34.443	184074	422	42	184076	162	35	184012	59	35				184107	66	38				184073	174	42	184071	74	32	184116	18	36	184086	8	30	184118	23	45				184118	91	38	184070	144
N1:184289	chr01	184216	184362	+4:YAR027W;	3.99374	5	71	13.831	184277	395	32	184285	124	36	184327	68	32	184321	69	29	184290	62	31	184323	71	23	184279	201	33	184276	14	32	184323	13	45	184281	10	20	184318	13	20	184321	35	29	184276	123	30	184309	46
N1:184438	chr01	184365	184511	+5:YAR027W;	4.86829	6	78	13.6	184437	221	33	184450	83	32							184461	55	29				184432	95	33	184438	10	21				184450	3	24				184483	10	23	184438	27	30
N1:184628	chr01	184555	184701	+6*:YAR027W; -1:YAR028W;	4.53004	5	100	8.735	184626	253	34	184696	132	31	184616	61	33	184622	65	26	184691	57	37	184684	88	36	184625	261	30	184609	24	28	184634	14	29	184616	6	21	184620	9	22	184631	53	31	184626	54	29	184636	31
N1:184881	chr01	184808	184954	+1:YAR028W;	5.21711	6	96	10.053	184877	302	32	184871	112	30	184868	72	33	184866	65	34	184869	50	33	184862	55	33	184899	264	26	184892	32	21	184876	12	17	184869	9	25	184881	14	27	184867	22	24	184883	168	29	184871	243
N1:185050	chr01	184977	185123	+2:YAR028W;	4.57011	5	100	8.167	185047	256	25	185046	85	29	185043	59	26	185040	28	28				185029	29	29	185047	92	28																185057	112	28	185053	125
N1:185209	chr01	185136	185282	+3:YAR028W;	5.7558	6	100	5.441	185199	1011	19	185200	256	23	185197	165	20	185194	153	18	185193	175	21	185188	234	17	185204	301	20	185200	22	18	185198	14	22	185207	9	15	185210	18	18	185192	44	20	185206	577	17	185205	451
N1:185379	chr01	185306	185452	+4:YAR028W;	5.63007	6	100	6.676	185389	721	24	185379	256	22	185369	104	24	185358	84	25	185381	88	24	185365	74	23	185389	128	20	185380	8	14	185385	11	19	185356	4	15	185377	9	9	185374	22	28	185393	281	16	185384	131
N1:185531	chr01	185458	185604	+5:YAR028W;	4.89663	5	84.33	3.899				185529	96	31	185524	66	30	185520	42	23				185520	68	22				185528	4	16	185534	2	8	185520	4	26	185530	5	10	185524	12	14
N1:185689	chr01	185616	185762	+6*:YAR028W;	5.17531	6	100	10.33	185689	329	25	185693	144	20	185684	86	23	185689	51	22	185687	66	21	185691	68	15	185691	23	22	185683	9	19	185688	6	11				185680	4	21	185679	7	13	185706	22	20	185687	15
N1:185939	chr01	185866	186012	-1:YAR029W;	2.91514	4	73	16.693	185954	312	38	185961	95	28	185964	40	24	185959	63	21	185962	43	29	185963	66	17	185891	15	31				185949	1	0	185949	1	0	185949	8	26	185965	4	9				185954	5
N1:186105	chr01	186032	186178	0:YAR029W;	2.71519	4	100	20.704										186138	71	20				186142	91	21	186098	25	41	186061	4	26							186106	2	7	186137	11	26	186036	2	36	186110	2
N1:186258	chr01	186185	186331	+1:YAR029W;	3.88698	5	89	14.135	186245	868	26	186251	246	26	186260	95	30				186255	75	27				186246	72	28	186250	9	8	186230	8	21	186243	3	21				186309	9	33	186245	27	22	186281	4
N1:186447	chr01	186374	186520	+2:YAR029W;	4.1289	6	100	17.244	186446	527	37	186463	162	29	186477	76	28	186470	71	23	186466	71	30	186469	103	19				186451	10	23	186500	2	8	186478	4	15	186407	5	22	186466	7	20	186447	15	24
N1:186612	chr01	186539	186685	+3*:YAR029W;	4.83734	6	100	13.06	186612	642	29	186624	165	23	186625	105	26	186626	98	26	186622	88	25	186631	108	22	186610	77	23	186627	11	15				186644	6	23	186601	6	9	186652	6	19	186613	10	35	186611	7
N1:186810	chr01	186737	186883	-1:YAR031W;	3.97253	6	94.5	24.744	186821	526	35	186825	169	28	186826	94	32	186820	57	28	186818	61	31	186820	86	25	186828	80	31	186796	7	33				186837	4	27	186775	4	15	186825	7	16
N1:187006	chr01	186933	187079	+1:YAR031W;	4.49703	6	100	16.207				187076	37	45				186967	42	30				186970	61	20	186976	88	26	186973	8	23	186977	4	3				186954	6	14	186981	26	28	186965	17	17	186974	20
N1:187189	chr01	187116	187262	+2:YAR031W;	1.02245	3	100	29.738	187129	118	42				187127	40	41				187118	23	32	187139	18	43	187123	35	39	187171	4	41							187161	7	44				187127	11	46	187130	6
N1:187341	chr01	187268	187414	+3:YAR031W;	4.66108	6	100	30.542	187324	656	23	187324	248	22	187322	156	21	187322	128	19	187319	118	19	187320	139	18	187327	250	20	187326	19	30	187323	16	24	187315	12	30	187317	16	18	187314	68	19	187329	51	19	187321	50
N1:187592	chr01	187519	187665	+5:YAR031W;	1.97788	3	100	40.204
N1:187891	chr01	187818	187964	+7*:YAR031W; 0:YAR033W;	3.08456	6	85.25	29.896				187830	38	33	187831	19	23	187832	19	24	187833	16	23	187830	22	21	187831	72	23	187831	2	0				187862	2	19				187838	58	24	187830	11	32	187834	15
N1:188087	chr01	188014	188160	+1:YAR033W;	4.94179	6	84	12.28										188107	27	22							188107	95	22	188018	15	35	188016	13	29	188091	13	34	188018	12	27	188082	89	33	188103	52	19	188014	95
N1:188254	chr01	188181	188327	+2:YAR033W;	2.82622	3	67	7.234
N1:188427	chr01	188354	188500	+3:YAR033W;	2.71676	4	52.5	20.314	188410	177	11	188412	37	10	188412	19	12	188411	9	10	188409	16	10	188410	10	16	188410	56	9	188418	4	7	188403	6	9	188405	12	5	188404	4	9	188413	34	27	188416	11	13	188409	44
N1:188636	chr01	188563	188709	+4:YAR033W;	2.45622	4	50	46.618																188639	3	4																188665	29	22				188639	1
N1:188871	chr01	188798	188944	+2*:anti-YAR033W-2; +5:YAR033W;	4.81191	5	80.33	5.263																									188867	1	0	188870	2	0	188868	1	0	188874	105	36
N1:189025	chr01	188952	189098	+1:anti-YAR033W-2; +6*:YAR033W;	2.34748	3	100	15.588	189010	12	14	189004	3	27	188954	1	0				189020	2	0	189021	1	0	189005	14	15	189009	1	0	189020	1	0				189020	1	0	189043	46	31	189020	1	0	189015	5
N1:189215	chr01	189142	189288	-1:anti-YAR033W-2;	1	1	45	0
N1:189407	chr01	189334	189480	+12*:anti006;	3.05596	4	62.5	17.671	189411	27	20	189409	8	5	189442	3	15	189414	1	0				189405	3	8	189406	4	28	189448	6	26	189446	1	0							189402	7	33				189410	6
N1:189621	chr01	189548	189694	+11:anti006;	1.00056	2	50.5	46.669				189581	4	36																189633	6	20	189599	4	15							189605	14	41				189602	1
N1:189802	chr01	189729	189875	-1:YAR035W; +10:anti006;	2.73892	5	90	39.07				189846	23	33							189853	13	40	189848	6	23																						189791	2
N1:190031	chr01	189958	190104	0:YAR035W; +9:anti006;	3.18678	5	100	20.354				190051	24	21	190062	3	21	190022	5	13	190026	10	16							190055	4	20				190077	2	29										190056	19
N1:190240	chr01	190167	190313	+2:YAR035W; +8:anti006;	2.43138	4	100	22.998	190187	40	25	190268	22	29				190266	3	10	190194	3	32	190274	7	17	190199	20	29	190276	6	5	190267	6	48				190272	4	30	190271	26	32	190197	13	20	190277	105
N1:190501	chr01	190428	190574	+4:YAR035W; +6:anti006;	2.48182	5	82	33.374	190443	178	35	190513	43	30	190461	40	34	190432	7	14	190514	22	26	190528	26	32	190506	47	36	190548	1	0	190509	17	32	190484	7	30	190516	8	37	190513	37	40	190509	17	31	190438	105
N1:190666	chr01	190593	190739	+5:YAR035W; +5:anti006;	2.77115	3	80	8.386																																								190659	53
N1:190814	chr01	190741	190887	+6:YAR035W; +4:anti006;	2.4181	4	100	22.366	190760	210	24	190768	37	34	190745	34	32	190763	10	16	190769	39	32	190762	23	18	190764	29	18	190781	1	0	190773	28	26	190765	40	26	190762	24	18				190756	12	33	190864	6
N1:191014	chr01	190941	191087	+7:YAR035W; +3:anti006;	4.12113	5	70.67	13.027				191023	45	27	191018	65	34				191024	34	35	191060	49	35	191025	29	38	191025	3	34	191041	16	32	191023	22	29	191026	24	42	191035	24	39				191033	13
N1:191163	chr01	191090	191236	+8:YAR035W; +2:anti006;	1.55843	3	100	43.822	191099	223	39	191173	62	42	191183	99	44	191099	16	39													191231	17	29	191187	43	41				191208	30	36	191178	10	39	191185	10
N1:191409	chr01	191336	191482	+9:YAR035W; 0:anti006;	2.9904	5	67.33	39.245	191353	262	37	191347	42	35	191347	63	36	191351	27	29				191424	63	42				191346	3	1	191430	8	26	191361	17	30				191412	28	43	191343	3	34
N1:191612	chr01	191539	191685	+10:YAR035W; +4*:SUT436; -1:anti006;	3.77464	5	72	17.501				191577	69	40				191568	26	34				191578	68	44							191580	20	41	191648	30	45
N1:191782	chr01	191709	191855	+11:YAR035W; +3:SUT436;	4.25163	5	74	11.389	191712	376	33	191780	85	43	191710	74	36	191846	34	40	191714	46	37	191781	77	46	191713	81	42	191711	13	37													191719	6	44	191714	18
N1:191953	chr01	191880	192026	+12:YAR035W; +2:SUT436;	3.15718	5	66.67	42.25	192011	234	28	192013	57	30	192006	66	35				192012	39	31	192005	48	34													191929	10	37	192015	18	21	191904	8	36	192023	9
N1:192140	chr01	192067	192213	+13:YAR035W; +1:SUT436; +3*:YAR035C-A;	4.16601	5	84	12.621	192160	322	25	192162	101	30	192155	95	30	192132	35	38	192175	54	34	192156	72	30	192171	47	26	192175	10	34							192192	24	27	192182	22	29	192164	13	17	192181	6
N1:192305	chr01	192232	192378	+14:YAR035W; -1:YAR042W; 0:SUT436; +2:YAR035C-A;	3.94206	4	100	3.367	192314	91	36				192306	31	21							192304	12	14							192261	3	29	192316	1	0				192341	3	36	192349	1	0
N1:192625	chr01	192552	192698	+1:YAR042W; -1:YAR035C-A;	4.53911	5	100	8.672	192632	169	22	192640	77	20	192638	36	24													192640	49	21							192631	10	20	192627	23	19				192638	162
N1:192787	chr01	192714	192860	+2:YAR042W;	5.88398	6	88.75	3.67	192782	606	17	192788	147	19	192787	139	23	192783	70	20	192780	99	14	192785	97	21	192780	255	16	192788	32	14	192779	66	11	192782	23	10	192782	29	14	192785	76	17	192780	399	14	192791	513
N1:192956	chr01	192883	193029	+3:YAR042W;	3.89575	5	100	22.963	192951	677	19	192954	147	22	192952	133	24	192948	70	19	192949	109	19	192949	108	24	192953	205	21	192947	34	24	192951	29	18	192952	26	19	192943	15	20	192953	85	22	192951	313	16	192955	326
N1:193117	chr01	193044	193190	+4:YAR042W;	2.37432	3	79	14.844	193120	453	24	193132	122	27	193120	104	26	193112	63	24				193115	76	26	193116	87	20				193115	6	17	193105	15	25	193105	14	26	193121	50	24	193117	128	23	193119	142
N1:193278	chr01	193205	193351	+5:YAR042W;	2.80186	4	66	18.565	193270	364	27	193315	104	33				193260	54	36	193262	92	23	193297	71	29				193234	3	25	193280	12	25	193282	13	25	193266	10	33	193276	24	26	193285	46	27	193268	55
N1:193586	chr01	193513	193659	+7:YAR042W;	3.41798	4	56	11	193580	611	27	193580	190	35				193615	55	40	193581	114	27	193583	76	27	193653	43	39	193599	22	15	193574	6	28	193615	6	40	193598	8	29				193578	36	29	193613	20
N1:193897	chr01	193824	193970	+9:YAR042W;	4.57204	5	100	8.264	193898	881	20	193893	157	31	193894	140	26	193889	83	22	193891	125	25	193888	69	23	193891	66	23	193902	9	29	193885	5	17	193852	11	24	193890	6	10				193889	25	16	193889	6
N1:194089	chr01	194016	194162	+10:YAR042W;	2.36762	4	100	27.839	194081	336	28	194131	137	33	194081	75	33							194090	53	28	194137	44	33	194130	10	32	194122	8	18	194109	1	0	194094	1	0				194076	12	12	194079	4
N1:194358	chr01	194285	194431	+12:YAR042W;	4.64114	5	87	7.396	194386	532	31	194306	116	38	194362	101	33	194348	63	39	194344	76	34	194368	72	33				194409	3	26				194339	9	40	194409	2	27	194370	13	29				194307	3
N1:194510	chr01	194437	194583	+13:YAR042W;	3.74228	4	100	7.274	194534	497	32	194493	104	34	194528	101	32	194531	67	36	194534	68	36	194522	84	32	194498	30	32				194455	7	34	194562	1	0				194550	6	25	194566	10	23
N1:194821	chr01	194748	194894	+15:YAR042W;	3.54968	6	81	31.02	194872	537	30	194885	124	33	194870	82	30	194859	48	28	194856	95	32	194861	88	38							194854	7	25				194852	7	27							194850	6
N1:195004	chr01	194931	195077	+16:YAR042W;	2.81772	4	100	20.614	195042	412	30	195042	94	30				195017	57	31	195038	73	37	195045	36	36							195056	6	46										195043	8	41	195045	4
N1:195190	chr01	195117	195263	+17:YAR042W;	3.94103	5	99.25	18.295	195196	486	37	195199	179	33	195188	105	37	195189	85	39	195200	100	40	195198	103	42	195198	50	35	195196	9	30	195213	7	25	195189	10	21				195200	22	25				195252	4
N1:195378	chr01	195305	195451	+18:YAR042W;	2.26763	4	89	34.157	195349	618	34	195361	179	40	195348	140	37	195348	74	35	195348	114	39	195348	119	38	195350	61	35	195415	8	40	195373	11	20				195355	5	21	195353	34	26	195345	12	20	195418	5
N1:195589	chr01	195516	195662	+19:YAR042W;	3.06603	4	96.33	15.937	195519	509	42	195587	169	37	195588	116	36	195593	76	36	195590	103	37	195589	121	35	195588	61	39	195616	10	35	195542	4	23	195659	10	33	195616	8	33	195572	33	26	195640	9	32
N1:195760	chr01	195687	195833	+20:YAR042W;	2.64597	4	65.5	21.93				195757	85	37	195764	61	30				195745	74	40	195761	57	28	195760	21	28				195734	8	34							195780	30	44
N1:196050	chr01	195977	196123	+22:YAR042W;	3.46596	5	100	32.164							196112	49	39							196122	40	47							196051	9	25	195979	5	30							196043	8	31
N1:196264	chr01	196191	196337	+3*:Unit003; +23*:YAR042W;	2.00295	4	100	54.856	196329	318	33	196235	56	34	196273	39	39	196249	42	41	196298	33	52	196311	20	37	196259	33	40	196284	5	46										196252	20	37	196322	7	38	196262	4
N1:196475	chr01	196402	196548	+2:Unit003;	2.94698	4	67	24.29	196491	296	27	196488	68	32	196493	44	28	196502	51	26	196495	41	29	196496	41	25	196490	87	29	196508	16	26	196498	7	21				196486	9	12	196474	18	30	196501	32	29	196490	56
N1:196626	chr01	196553	196699	+1:Unit003;	3.11684	5	79.67	27.581	196693	171	34	196687	48	33										196691	20	31										196554	2	34				196685	9	33	196698	24	32
N1:196834	chr01	196761	196907	0:Unit003;	4.49053	6	91.75	20.04	196870	182	30	196883	69	21	196873	40	27	196873	56	24	196899	30	27	196871	35	21	196871	79	28	196899	10	44	196884	3	8	196889	7	33	196822	4	23	196871	16	30	196872	43	18	196874	57
N1:197114	chr01	197041	197187		2.55297	6	79.25	35.325	197061	262	34	197061	84	32	197056	42	34	197066	38	32	197063	32	33	197180	28	26	197072	79	27	197114	11	34	197094	11	23	197074	13	31	197088	6	30	197066	11	31	197083	19	37	197070	36
N1:197335	chr01	197262	197408		4.08627	6	99.25	23.805	197336	309	38	197313	89	34	197377	46	31	197341	68	36	197338	38	39	197331	43	30	197398	49	39	197328	6	23				197335	4	0	197312	2	11	197350	9	33	197330	7	33	197338	17
N1:197511	chr01	197438	197584		1	1	-2	0				197537	8	32				197532	8	45	197524	7	18							197530	3	6
N1:197662	chr01	197589	197735		5.22317	6	86.25	10.27	197605	149	38				197704	58	40	197715	49	40	197716	39	45	197652	46	38	197717	61	38	197712	7	50	197701	4	41	197669	1	0				197599	3	28	197718	10	25
N1:197837	chr01	197764	197910		4.86043	6	94.75	16.154	197765	359	36	197766	83	35	197874	65	43	197872	47	36	197879	53	39	197882	41	35	197875	42	31	197884	9	22	197877	4	21	197859	3	17	197868	2	8	197764	7	25	197879	9	41	197764	14
N1:198040	chr01	197967	198113		4.4951	6	100	15.118	198058	421	25	198056	90	34	198058	55	27	198056	70	22	198059	60	27	198067	69	28	198059	37	25	198071	5	34	198051	4	0	198045	2	11	198055	1	0	198076	5	39	198053	11	16	198060	22
N1:198218	chr01	198145	198291		3.37124	5	81.25	29.908	198240	236	32	198243	73	28	198240	39	30	198243	29	21	198243	37	28	198242	34	24	198237	29	25	198241	7	28	198249	6	26	198252	3	8	198238	4	32	198265	6	28				198244	20
N1:198393	chr01	198320	198466		2.85341	4	56	27.24	198389	173	22	198421	39	19	198393	30	22	198411	41	20	198408	18	25	198418	29	25	198394	17	19							198456	1	0	198399	2	13	198455	7	28	198383	4	24	198417	8
N1:198591	chr01	198518	198664		1.5936	3	98.5	35.133																198593	1	0
N1:198788	chr01	198715	198861	-1:Unit007;	4.25872	5	100	11.082	198838	193	33	198836	41	37							198800	16	29	198844	23	28	198854	36	27	198847	21	34							198842	4	21	198847	24	29				198845	34
N1:198963	chr01	198890	199036	+1:Unit007;	5.91644	6	100	3.125													198986	1	0
N1:199139	chr01	199066	199212	+2:Unit007;	5.46047	6	100	8.28													199156	1	0
N1:199298	chr01	199225	199371	+3:Unit007;	3.60783	6	97.25	35.246
N1:199460	chr01	199387	199533	+4:Unit007;	2.17713	3	98.5	17.559	199472	1	0																															199392	1	0
N1:199668	chr01	199595	199741	+5:Unit007;	4.22466	5	99	11.904																									199701	1	0
N1:199858	chr01	199785	199931	+6*:Unit007;	3.72946	5	53.67	15.304				199787	1	0																						199857	3	3	199860	2	2							199861	1
N1:200030	chr01	199957	200103	+3*:CUT442;	2.26882	3	99	17.039	199961	12	3	199965	4	9	199960	3	2	199981	1	0	199968	3	8	199965	2	5	199962	5	2	199965	7	1	199965	1	0										199959	1	0
N1:200188	chr01	200115	200261	+2:CUT442;	2.06821	3	50	23.094
N1:200372	chr01	200299	200445	+1:CUT442;	5.24208	6	94.75	9.791
N1:200654	chr01	200581	200727	-1:CUT442;	4.4412	5	93	9.311
N1:200806	chr01	200733	200879		3.58702	5	100	30.31																									200771	1	0				200822	1	0
N1:200994	chr01	200921	201067		3.80038	5	100	32.547
N1:201297	chr01	201224	201370		5.33011	6	100	9.453	201262	54	5							201263	5	5	201263	4	3	201264	5	4										201256	1	0							201258	2	3	201266	9
N1:201466	chr01	201393	201539		4.31285	6	94.75	16.852
N1:201626	chr01	201553	201699		2.79309	3	100	7.937
N1:201799	chr01	201726	201872		2.37085	5	85.33	31.177
N1:201969	chr01	201896	202042		3.10414	6	86.25	36.181
N1:202153	chr01	202080	202226		4.97179	6	94.5	13.446																			202201	1	0
N1:202307	chr01	202234	202380		3.84942	5	87	14.68																									202312	1	0				202309	4	10
N1:202490	chr01	202417	202563		4.74603	6	100	14.953
N1:202650	chr01	202577	202723		1.89967	3	17	25.942	202589	1	0																															202615	1	0
N1:202800	chr01	202727	202873		4.04592	6	100	17.77	202839	209	33	202844	61	34	202843	25	28	202845	44	31	202850	51	35	202793	30	37	202845	113	35	202801	69	30	202839	4	8				202814	3	7	202818	12	30	202832	17	36	202819	39
N1:202969	chr01	202896	203042		4.36374	6	61.5	16.055	203016	302	42	203017	62	42	203002	30	42	203021	32	39	203013	52	42	202942	67	38	203014	117	45	202995	62	35	203005	12	33	202926	3	31							203011	22	34	203025	34
N1:203150	chr01	203077	203223	-1:YAR050W;	4.28264	6	99.25	17.736	203175	555	34	203175	134	30	203180	88	34	203174	92	28	203174	90	30	203149	87	34	203173	150	30				203173	12	27	203156	11	37	203136	9	40	203093	20	30	203175	29	29	203178	40
N1:203310	chr01	203237	203383	+1:YAR050W;	2.9296	4	68	15.756										203331	108	40	203333	81	38	203313	65	42	203321	103	42				203325	10	43	203320	10	36	203331	9	40	203247	28	48
N1:203464	chr01	203391	203537	+2:YAR050W;	4.01426	6	100	17.694				203485	253	24	203482	141	26	203485	129	26	203482	130	28	203482	129	27	203486	177	27	203439	46	31	203491	23	27	203482	19	26	203495	19	19	203437	58	42	203482	28	24	203480	49
N1:203711	chr01	203638	203784	+3:YAR050W;	1.9214	3	50	22.271
N1:203942	chr01	203869	204015	+4:YAR050W;	2.84368	5	45.33	23.458				203966	1	0
N1:204096	chr01	204023	204169	+5:YAR050W;	3.37969	6	99.75	24.977							204142	1	0													204109	1	0
N1:204283	chr01	204210	204356	+6:YAR050W;	1.54926	4	64	34.137
N1:204558	chr01	204485	204631	+8:YAR050W;	1.35426	2	100	21.213
N1:204754	chr01	204681	204827	+9:YAR050W;	1.0093	2	-1	36.77
N1:204982	chr01	204909	205055	+10:YAR050W;	1.76407	2	100	12.021
N1:205236	chr01	205163	205309	+12:YAR050W;	1.6518	2	100	14.849
N1:205618	chr01	205545	205691	+14:YAR050W;	1.49226	2	-1	18.385																205565	1	0	205564	1	0
N1:205788	chr01	205715	205861	+15:YAR050W;	2.12913	3	100	20.502
N1:205987	chr01	205914	206060	+16:YAR050W;	1.32322	3	50	32.501	205966	1	0										206033	1	0							206030	2	4				206037	1	0
N1:206298	chr01	206225	206371	+18:YAR050W;	2.25368	5	39.67	32.86	206268	100	13	206267	27	25	206269	29	17	206267	12	10	206271	34	36	206268	18	28	206267	30	18	206293	14	11	206269	11	21	206277	6	13	206277	2	13	206288	6	17	206275	5	11	206290	20
N1:206455	chr01	206382	206528	+19:YAR050W;	1.65611	3	100	34.269
N1:206624	chr01	206551	206697	+20:YAR050W;	2.60126	5	72.33	35.103										206656	107	19										206648	10	13	206553	16	19	206654	22	20				206551	46	23				206553	19
N1:206913	chr01	206840	206986	+22:YAR050W;	3.50357	5	93	18.783										206876	3	30	206971	150	6	206973	118	3							206972	15	3				206867	2	34	206981	52	9	206974	11	4
N1:207123	chr01	207050	207196	+23:YAR050W;	2.30718	4	79.5	24.893	207090	719	5	207090	223	4	207090	114	3	207090	82	3	207176	1	0				207090	202	6	207091	17	3				207091	24	2	207091	13	3				207167	1	0	207090	9
N1:207298	chr01	207225	207371	+24:YAR050W;	3.01908	5	90	31.445	207346	4	19	207254	1	0				207253	1	0							207252	2	27							207248	2	4				207308	1	0				207316	1
N1:207477	chr01	207404	207550	+25:YAR050W;	1.76415	2	100	12.021	207497	9	15				207490	1	0	207489	1	0							207498	2	3													207494	30	33
N1:207682	chr01	207609	207755	+26:YAR050W;	1.52546	3	21	43.132	207672	26	24	207615	9	23	207665	7	31	207651	1	0	207677	9	33	207669	4	4	207669	7	26	207631	4	17				207649	2	21	207612	4	28	207706	29	33	207665	3	4	207617	8
N1:207832	chr01	207759	207905	+27:YAR050W;	3.22503	4	58.5	13.175	207835	38	22	207822	20	18	207836	4	8	207842	6	13	207833	11	19	207823	13	21	207829	17	13	207852	1	0	207762	4	48	207826	2	3	207823	2	6	207885	55	37	207834	12	10	207822	13
N1:207998	chr01	207925	208071	+28:YAR050W;	3.56665	4	50	9.743
N1:208182	chr01	208109	208255	+29*:YAR050W;	1.79163	3	0	36.116
N1:208474	chr01	208401	208547		2.56896	5	56	30.078
N1:208781	chr01	208708	208854		2.01651	4	50.5	31.284																																		208772	2	6
N1:208935	chr01	208862	209008		2.50939	3	50	12.858
N1:209247	chr01	209174	209320		2.21246	4	50	32.989
N1:209420	chr01	209347	209493		2.89547	3	45	5.568	209452	3	35										209454	1	0							209458	1	0							209482	1	0				209451	1	0
N1:209791	chr01	209718	209864		3.08152	5	70	28.004
N1:210107	chr01	210034	210180		3.2213	5	73	24.733
N1:210257	chr01	210184	210330		2.32233	5	98.67	35.996
N1:210464	chr01	210391	210537		2.85241	5	82.33	37.287																			210438	1	0
N1:210684	chr01	210611	210757		3.04691	5	72.33	31.326																			210727	1	0	210699	1	0
N1:210924	chr01	210851	210997		1.55859	3	50	41.605
N1:211107	chr01	211034	211180		2.35696	3	26	15.373				211046	1	0
N1:211287	chr01	211214	211360		2.59001	3	100	11.504
N1:211450	chr01	211377	211523		2.42153	3	100	14.048
N1:211617	chr01	211544	211690		1.98618	2	-1	2.828
N1:211786	chr01	211713	211859		2.7411	3	100	8.963
N1:211958	chr01	211885	212031		2.83546	3	100	7.024
N1:212157	chr01	212084	212230		2.22808	4	50	36.905	212156	2	1																212157	2	0													212158	18	27
N1:212350	chr01	212277	212423		1.10911	2	-1	26.87
N1:212523	chr01	212450	212596		2.95718	3	100	3.512
N1:212688	chr01	212615	212761		1.96905	2	-1	4.243
N1:212854	chr01	212781	212927		2.87447	3	100	6.11
N1:213050	chr01	212977	213123		2.87447	3	100	6.11
N1:213233	chr01	213160	213306		2.86929	3	100	6.245
N1:213392	chr01	213319	213465		2.96732	3	100	3.055
N1:213541	chr01	213468	213614		1.98618	2	100	2.828
N1:213692	chr01	213619	213765		3.36301	4	50	12.014
N1:213870	chr01	213797	213943		2.7993	3	100	7.81
N1:214023	chr01	213950	214096		2.40312	3	23	14.572
N1:214227	chr01	214154	214300		2.86077	3	100	6.429
N1:214412	chr01	214339	214485		1.36532	3	100	33.561
N1:214713	chr01	214640	214786		1.99257	3	100	31.241
N1:214870	chr01	214797	214943		1.35426	2	-1	21.213
N1:215126	chr01	215053	215199		1.70981	3	56	28.378
N1:215327	chr01	215254	215400		2.15145	3	0	19.088
N1:215495	chr01	215422	215568		1.65174	2	56	14.849
N1:215663	chr01	215590	215736		2.86077	3	100	6.429
N1:215861	chr01	215788	215934		1.88827	3	100	30.616
N1:216052	chr01	215979	216125		1.96752	4	50	43.043
N1:216315	chr01	216242	216388		2.91521	3	100	5
N1:216549	chr01	216476	216622		1.76435	3	100	41.581
N1:216717	chr01	216644	216790		2.01692	3	100	26.889
N1:216915	chr01	216842	216988		2.81362	3	100	7.506
N1:217086	chr01	217013	217159		1.95718	2	-1	4.95
N1:217264	chr01	217191	217337		2.36283	3	100	15.308
N1:217461	chr01	217388	217534		1.28343	2	100	22.627
N1:217634	chr01	217561	217707		1.62169	2	-1	15.556
N1:217791	chr01	217718	217864		1.94825	3	100	33.724
N1:217966	chr01	217893	218039		2.95718	3	100	3.512
N1:218156	chr01	218083	218229		2.06419	3	100	22.368
N1:218321	chr01	218248	218394		2.8967	3	100	5.508
N1:218605	chr01	218532	218678		2.72901	3	100	9.165
N1:218780	chr01	218707	218853		1.28557	3	100	38.158
N1:219078	chr01	219005	219151		2.41516	3	100	14.189
N1:219261	chr01	219188	219334		1.95488	4	50	48.148	219195	1	0
N1:219440	chr01	219367	219513		2.15177	3	100	18.735
N1:219632	chr01	219559	219705		2.87195	4	50	22.292	219642	25	5	219642	8	6	219642	4	2	219638	3	7	219645	5	2	219644	10	4	219645	11	2	219641	4	3	219643	2	2	219642	5	1	219640	7	4	219607	89	20	219646	4	0	219642	17
N1:219796	chr01	219723	219869		1.73809	2	-1	12.728
N1:219950	chr01	219877	220023	-1:YAR064W;	2.93522	3	100	4.359
N1:220138	chr01	220065	220211	+1:YAR064W;	2.19482	3	100	18.358
N1:220306	chr01	220233	220379	+2:YAR064W;	1.62938	3	6	32.517
N1:220516	chr01	220443	220589	+3:YAR064W;	1.97145	3	100	34.196	220573	15	16	220448	1	0	220574	3	12	220569	4	18							220570	9	12										220571	9	13	220580	33	40
N1:220684	chr01	220611	220757	-1:YAR066W; +4*:YAR064W;	2.91348	3	50	5.033				220686	4	4							220686	4	0	220684	4	10				220687	1	0				220681	3	6				220741	8	19	220687	3	0	220687	2
N1:220840	chr01	220767	220913	0:YAR066W;	2.01272	3	0	26.633	220868	1	0
N1:221141	chr01	221068	221214	+2:YAR066W;	1.8734	3	100	22.03
N1:221335	chr01	221262	221408	+3:YAR066W;	1.73323	3	100	24.542
N1:221487	chr01	221414	221560	+4:YAR066W;	1.79454	3	0	52.865	221480	14	6	221471	5	7	221470	1	0	221470	1	0	221475	5	11	221473	3	7	221474	5	5							221481	2	1				221452	18	18	221481	7	6	221477	15
N1:221809	chr01	221736	221882	+6*:YAR066W;	2.03777	3	100	23.288							221849	2	0				221866	3	11	221868	3	8							221859	1	0
N1:221978	chr01	221905	222051		2.31478	3	0	15.631	221982	11	4	221978	6	4				221982	4	4							221984	3	3	221970	1	0							221980	2	7	221955	50	32	221985	1	0	221979	3
N1:222147	chr01	222074	222220	-1:YAR068W;	2.96402	3	100	3.215
N1:222311	chr01	222238	222384	+1:YAR068W;	3.75716	4	50	7.042	222306	121	3	222304	24	4	222306	23	4	222305	23	3	222306	45	3	222305	15	4	222305	35	3				222305	4	2	222308	3	3	222303	4	2	222308	17	27	222305	17	4	222303	6
N1:222504	chr01	222431	222577	+2:YAR068W;	2.19289	4	50	27.109				222522	5	4	222526	9	2							222523	10	2							222511	4	5	222514	1	0				222524	64	19
N1:222820	chr01	222747	222893	+4:YAR068W;	2.07557	3	100	21.572
N1:223043	chr01	222970	223116	+5*:YAR068W;	1.83752	3	50	39.879				223055	21	11	223057	4	1	223050	6	6	223054	3	3	223053	6	18																223019	14	25	223098	1	0	223055	3
N1:223335	chr01	223262	223408		1.91513	3	100	24.826
N1:223654	chr01	223581	223727		3.46134	5	55.67	18.439																						223654	1	0
N1:223892	chr01	223819	223965		2.98106	3	100	2.309
N1:224083	chr01	224010	224156		2.95027	3	100	3.786
N1:224252	chr01	224179	224325		2.83719	3	100	7
N1:224423	chr01	224350	224496		2.05619	3	100	23.431
N1:224746	chr01	224673	224819		1.96906	2	0	4.243
N1:224931	chr01	224858	225004		2.44714	3	100	13.892
N1:225191	chr01	225118	225264	-1:YAR071W;	2.35383	3	100	15.308																			225140	1	0
N1:225369	chr01	225296	225442	+1:YAR071W;	2.8967	3	100	5.508
N1:225526	chr01	225453	225599	+2:YAR071W;	2.81189	3	100	7.55
N1:225676	chr01	225603	225749	+3:YAR071W;	2.86114	4	50	23.101	225654	19	1	225654	15	2	225654	9	1	225654	6	1	225654	16	1	225654	8	1	225655	7	0				225653	1	0				225652	1	0	225727	60	18	225653	2	1	225654	4
N1:225874	chr01	225801	225947	+4:YAR071W;	1.74915	3	100	30.79
N1:226052	chr01	225979	226125	+5:YAR071W;	1.77652	3	100	26.951
N1:226242	chr01	226169	226315	+6:YAR071W;	2.35218	3	100	15.044
N1:226405	chr01	226332	226478	+7:YAR071W;	1.17946	2	-1	24.749																																					226456	1	0
N1:226556	chr01	226483	226629	+8:YAR071W;	2.34538	4	50	39.737	226566	111	9	226565	32	18	226565	14	7	226567	4	7	226568	14	7	226564	14	18	226566	23	8				226561	3	5				226562	3	4	226567	19	19				226563	2
N1:226812	chr01	226739	226885	+10:YAR071W;	2.68297	5	66.67	30.312	226764	8	7	226766	3	3	226751	1	0	226852	1	0	226748	1	0				226868	1	0	226863	1	0										226772	5	27
N1:227061	chr01	226988	227134	+12*:YAR071W;	4.14317	6	100	26.536
N1:227228	chr01	227155	227301		4.87301	5	99.25	4.324	227214	1	0
N1:227380	chr01	227307	227453		1	1	100	0
N1:227531	chr01	227458	227604		5.36939	6	75.75	8.981	227503	3	20	227472	1	0										227470	1	0
N1:227702	chr01	227629	227775		4.84539	5	72	4.775	227694	10	8	227686	3	7	227687	6	0	227690	9	11	227771	5	27	227686	2	10	227686	3	7	227693	2	4													227673	1	0
N1:227856	chr01	227783	227929		2.89539	3	100	5.568							227892	1	0										227878	2	13
N1:228017	chr01	227944	228090		4.79652	5	69.67	5.495	227992	1	0
N1:228182	chr01	228109	228255		2.52033	4	50	29.691	228240	107	13	228240	47	24	228240	31	11	228240	23	13	228242	37	17	228241	38	17	228241	14	16													228210	58	19	228241	3	1
N1:228331	chr01	228258	228404		1	1	-2	0	228390	2	24																						228274	2	20
N1:228504	chr01	228431	228577		3.53241	4	50	9.95										228492	1	0																						228484	7	2
N1:228669	chr01	228596	228742		3.3795	4	100	12.069	228606	21	6	228606	17	4	228608	7	3	228710	2	9	228608	12	5	228606	12	4	228609	2	3				228612	1	0							228733	14	17				228605	1
N1:229044	chr01	228971	229117		2.78591	3	100	8.083	229044	132	2	229043	59	9	229044	42	2	229044	34	2	229043	55	3	229042	32	2	229044	16	2				229043	3	1	229044	1	0				229046	27	24	229050	1	0	229044	1
N1:229323	chr01	229250	229396		3.23394	4	79	13.574	229358	6	1	229360	1	0							229384	1	0
N1:229574	chr01	229501	229647		3.25275	5	66	19.604	229580	5	27	229570	6	21	229563	1	0	229558	3	31	229576	3	17	229604	1	0
N1:229808	chr01	229735	229881		3.1055	4	21.5	16.299	229768	23	23	229771	14	31	229740	8	18	229735	3	21	229851	7	21	229767	4	15																			229835	1	0
N1:229980	chr01	229907	230053		2.24428	4	65	25.565	229981	4	31	229976	8	3	229982	2	0	230050	3	0
N1:230156	chr01	230083	230229		1.98785	3	0	20.664													230107	1	0													230177	1	0				230096	3	9
N2:255	chr02	182	328	+17:YBL113C;	1.17946	2	-1	24.749				237	81	9										238	55	13																186	19	10
N2:415	chr02	342	488	+16:YBL113C;	3.78129	4	70.5	6.652	412	30	4	411	4	2	413	10	13	397	1	0	410	20	11	410	6	4	410	3	3							464	1	0				423	15	35	415	1	0
N2:589	chr02	516	662	+15:YBL113C;	2.23588	3	100	17.214
N2:901	chr02	828	974	+13:YBL113C;	1.56507	3	100	28.572
N2:1150	chr02	1077	1223	+11:YBL113C;	2.46345	4	50	29.783				1163	95	6				1162	13	8	1164	82	5	1163	25	5				1165	3	2	1167	1	0	1165	1	0				1158	62	18	1167	1	0	1164	11
N2:1333	chr02	1260	1406	+10:YBL113C;	2.05769	3	50	20.817	1324	2	1
N2:1564	chr02	1491	1637	+9:YBL113C;	1.05627	2	100	29.698										1612	3	3							1612	3	4
N2:1853	chr02	1780	1926	+7:YBL113C;	2.32961	4	50	30.854				1921	10	34				1791	6	18	1893	4	38				1803	7	39													1906	29	3
N2:2110	chr02	2037	2183	+5:YBL113C;	2.106	3	50	20.033
N2:2264	chr02	2191	2337	+4:YBL113C;	1.05859	3	100	49.166
N2:2471	chr02	2398	2544	+4*:YBL112C; +3:YBL113C;	1.89218	3	100	29.484
N2:2733	chr02	2660	2806	+2:YBL112C; +1:YBL113C; +15*:YBL111C;	2.05769	3	100	20.817
N2:2945	chr02	2872	3018	+1:YBL112C; -1:YBL113C; +14:YBL111C;	1.89718	2	100	7.778
N2:3095	chr02	3022	3168	0:YBL112C; +13:YBL111C;	1.00055	2	-1	46.669
N2:3266	chr02	3193	3339	-1:YBL112C; +12:YBL111C;	2.0093	3	100	29.738
N2:3449	chr02	3376	3522	+11:YBL111C;	2.20234	3	100	18.475
N2:3623	chr02	3550	3696	+10:YBL111C;	2.59158	3	100	11.533
N2:3787	chr02	3714	3860	+9:YBL111C;	2.44004	3	100	13.868
N2:4071	chr02	3998	4144	+7:YBL111C;	2.3795	3	100	14.731
N2:4227	chr02	4154	4300	+6:YBL111C;	1.85915	3	100	37.233
N2:4374	chr02	4301	4447	+5:YBL111C;	1.0562	2	-1	29.698
N2:4532	chr02	4459	4605	+4:YBL111C;	2.44565	3	100	13.748
N2:4709	chr02	4636	4782	+3:YBL111C;	1.93254	3	100	52.424
N2:4905	chr02	4832	4978	+2:YBL111C;	2.09236	3	100	21.455
N2:5222	chr02	5149	5295	-1:YBL111C;	1.83919	3	100	52.596
N2:5409	chr02	5336	5482		2.59158	3	100	11.533
N2:5565	chr02	5492	5638		1	1	-2	0
N2:5761	chr02	5688	5834		1.0785	2	100	28.284
N2:5938	chr02	5865	6011		1.97768	2	100	3.536							5961	5	13	5995	4	21				6003	6	31	5963	1	0																			5950	1
N2:6181	chr02	6108	6254		2.58407	4	55.5	29.275	6246	111	7	6247	58	6	6247	25	6	6247	23	6	6249	69	6	6248	11	6	6249	4	4										6252	1	0	6230	2	24	6234	2	3	6238	4
N2:6431	chr02	6358	6504		3.67569	4	50	8.18
N2:6670	chr02	6597	6743		2.17667	3	51	17.521							6618	1	0
N2:6838	chr02	6765	6911		2.76361	4	50	26.64				6774	1	0	6769	3	14	6779	2	6	6775	6	3	6880	21	7	6884	13	8	6890	3	2										6870	20	35	6883	3	4	6874	4
N2:6993	chr02	6920	7066		2.34445	3	67	15.62	6993	136	8	6994	44	6	6994	42	6	6995	35	7	6991	33	5
N2:7148	chr02	7075	7221		2.99095	4	50	23.95																																								7158	1
N2:7394	chr02	7321	7467	+3*:YBL108C-A;	3.28204	4	50	13.793																7406	1	0																7330	15	20
N2:7696	chr02	7623	7769	+1:YBL108C-A;	2.61514	3	100	11.15
N2:7880	chr02	7807	7953	0:YBL108C-A;	2.14501	3	100	19.732	7843	1	0	7842	1	0																												7924	1	0
N2:8192	chr02	8119	8265		2.98963	3	100	1.732																																		8133	3	0
N2:8466	chr02	8393	8539		4.44895	6	100	15.484	8478	762	29	8495	403	28	8490	244	24	8492	246	22	8494	228	20	8489	282	20	8485	74	25	8532	54	30	8493	23	18	8493	11	15	8497	27	22	8490	76	23	8477	28	30	8490	17
N2:8636	chr02	8563	8709		3.24506	6	81	38.985	8648	1176	29	8698	406	30	8650	236	27	8648	197	31	8649	225	27	8648	238	30	8649	115	31				8656	21	22	8651	12	20	8647	28	26	8652	73	26	8624	18	25	8692	3
N2:8788	chr02	8715	8861		3.76321	4	53	6.952	8796	693	25	8853	145	34	8809	85	31	8819	82	27	8817	81	28	8816	83	28	8799	48	27	8814	18	35				8818	6	20	8815	2	2	8820	10	18	8787	8	30	8854	5
N2:8941	chr02	8868	9014		3.77669	5	76	16.652	8966	193	24				8977	16	22	8968	16	13	8979	35	20	8984	19	15	8964	9	30				8981	2	5	8973	2	18	8963	3	16	8970	3	25	8984	1	0
N2:9106	chr02	9033	9179		2.83372	4	51	16.623	9131	4	24	9141	1	0										9139	1	0				9085	6	28				9139	1	0										9083	1
N2:9277	chr02	9204	9350		1.00294	2	100	41.012
N2:9426	chr02	9353	9499		2.95814	5	99	27.309	9419	200	18	9423	111	15	9421	46	17	9418	38	20	9422	30	18	9423	37	20	9421	30	17	9429	3	21	9429	1	0	9418	1	0				9434	2	16	9397	1	0	9428	1
N2:9625	chr02	9552	9698		2.95929	5	34.67	21.824	9587	4	26	9598	4	33				9566	3	27	9634	3	0				9598	3	48	9588	1	0
N2:9793	chr02	9720	9866	+6*:YBL107C;	5.07063	6	93.5	10.944	9791	238	25	9783	87	26	9784	50	25	9822	29	30	9789	33	23	9788	36	26	9792	73	25	9782	30	15	9783	9	14	9785	22	26	9760	8	17	9792	86	21	9822	15	23	9782	31
N2:9977	chr02	9904	10050	+5:YBL107C;	5.02849	6	100	11.652	9983	199	32	9978	34	30				9986	27	27	9987	22	32	9982	28	28	9986	58	36	9978	90	16	9974	19	21	9980	15	20	9975	5	21	9977	58	23	9984	18	28	9977	41
N2:10136	chr02	10063	10209	+4:YBL107C;	5.18693	6	100	10.863	10153	283	33	10145	122	34	10148	47	27	10148	32	32	10152	62	30	10153	42	39	10151	153	26	10166	39	33	10150	31	28	10185	26	37	10164	18	26	10155	74	28	10151	107	27	10150	195
N2:10286	chr02	10213	10359	+3:YBL107C;	2.93048	4	100	30.232	10351	218	31	10348	95	33	10349	32	39							10349	22	31	10351	77	27	10351	25	28	10342	5	28				10354	7	30				10352	75	24	10350	141
N2:10503	chr02	10430	10576	+22*:YBL106C; +2:YBL107C;	5.20551	6	100	10.483	10505	324	25	10513	163	31	10505	71	26	10494	60	27	10496	53	33	10501	53	33	10505	198	24	10505	44	31	10500	18	25	10474	12	25				10497	89	24	10503	141	20	10511	186
N2:10765	chr02	10692	10838	+20:YBL106C; -1:YBL107C;	5.0826	6	86.5	10.926	10792	220	27	10796	70	24	10798	43	27	10795	41	24	10794	37	24	10798	35	26	10795	164	24	10798	16	24	10797	16	14	10798	24	17				10798	38	21	10795	65	24	10798	118
N2:10941	chr02	10868	11014	+19:YBL106C;	4.94046	6	99.25	12.011	10951	306	24	10953	158	32	10958	56	28	10957	43	26	10959	39	30	10955	63	28	10949	214	26	10952	23	29	10955	11	32	10955	27	29	10932	6	19	10957	57	30	10954	111	25	10960	162
N2:11109	chr02	11036	11182	+18:YBL106C;	4.45451	5	100	9.257	11113	349	27	11119	133	33	11116	87	28	11115	62	22	11117	68	25	11120	78	25	11114	168	22	11120	41	27	11119	18	26	11119	24	19	11104	13	20	11113	75	26	11111	151	19	11114	178
N2:11296	chr02	11223	11369	+17:YBL106C;	4.9528	6	100	12.211	11292	346	26	11296	123	27	11288	71	25	11285	81	23				11296	94	20	11292	163	25	11281	23	27	11284	11	27	11285	12	37	11287	6	19	11282	25	24	11288	120	22	11293	124
N2:11454	chr02	11381	11527	+16:YBL106C;	3.52353	6	84.75	23.056	11439	314	27	11445	71	28							11436	67	28							11442	7	17	11434	6	37										11440	55	26
N2:11635	chr02	11562	11708	+15:YBL106C;	3.59558	6	100	24.417	11590	500	30	11636	188	36	11589	80	30	11586	75	33	11599	111	29	11600	96	29	11583	141	26	11595	38	34	11597	12	21	11578	14	33	11580	10	19	11598	34	31	11593	64	31	11591	79
N2:11963	chr02	11890	12036	+13:YBL106C;	2.38001	6	100	48.525				11902	155	37	11890	100	39							11974	51	38	11890	118	35				11905	8	36	11914	15	31	11898	6	27	11967	21	39	11953	37	29	11891	31
N2:12264	chr02	12191	12337	+11:YBL106C;	2.05867	4	100	32.541				12252	114	42	12253	62	37	12287	54	35	12264	70	38				12260	77	35				12239	7	46	12263	10	43	12257	9	38							12289	12
N2:12492	chr02	12419	12565	+10:YBL106C;	3.76212	6	93.75	19.333	12424	463	38				12419	83	34				12432	81	40	12432	81	41	12421	63	39				12451	7	18	12458	8	27	12428	4	30	12423	32	41				12437	9
N2:12642	chr02	12569	12715	+9:YBL106C;	2.02195	3	83.5	20.207	12580	498	45	12598	116	40	12607	90	41				12647	98	34	12619	107	39	12625	83	39	12606	11	37	12675	14	31	12636	4	38	12591	13	26				12609	13	38	12616	16
N2:12806	chr02	12733	12879	+8:YBL106C;	3.29121	5	78	26.329	12777	562	40	12775	143	38	12781	103	39	12778	83	35				12778	89	33	12781	87	33	12795	20	38				12802	11	41	12779	19	23	12781	31	30	12778	6	32	12775	22
N2:12959	chr02	12886	13032	+7:YBL106C;	4.47337	6	85	21.794	12959	464	35	12959	157	33	12958	104	29	12953	90	29	12954	78	32	12957	100	30	12959	93	29				12932	5	28	12958	14	19	12926	20	34	12954	43	34	12952	11	17	12953	25
N2:13115	chr02	13042	13188	+6:YBL106C;	3.92696	5	92.67	20.921	13136	354	38	13128	104	32	13115	84	32	13133	67	32	13130	71	34	13133	56	35	13121	48	36	13136	8	22	13133	5	19	13123	9	41							13109	5	27	13116	17
N2:13316	chr02	13243	13389	+5:YBL106C;	2.28195	4	81.67	22.869	13316	393	38	13319	115	40	13316	68	37	13321	77	37	13326	53	42	13320	52	41	13317	57	42	13312	2	25	13321	7	22	13314	5	22	13277	9	34	13358	12	40	13301	9	26	13334	12
N2:13483	chr02	13410	13556	+4:YBL106C;	4.42179	6	100	24.899	13480	543	32	13479	179	33	13484	89	28	13486	88	30	13481	78	27	13482	90	34	13477	87	32	13482	17	25	13480	12	31	13474	7	29	13486	8	22	13510	30	39	13495	11	25	13489	40
N2:13690	chr02	13617	13763	+3:YBL106C;	2.67956	6	96	32.365	13655	415	29	13664	114	36	13756	91	33	13762	78	36	13653	79	28	13651	69	30	13762	78	32	13743	6	16	13690	13	27	13641	5	18	13671	5	22	13754	40	31	13643	4	16	13760	20
N2:13875	chr02	13802	13948	+2:YBL106C;	1.05996	3	67	48.125	13837	327	36	13846	69	38							13848	41	35	13847	37	39							13845	4	25							13907	8	36				13921	8
N2:14179	chr02	14106	14252	0:YBL106C; +23*:YBL105C;	2.3795	3	34	14.731	14184	124	31				14181	31	27	14194	28	29							14190	13	28	14170	1	0							14205	2	27	14115	22	32	14192	3	34
N2:14349	chr02	14276	14422	-1:YBL106C; +22:YBL105C;	5.61507	6	100	7.09	14349	429	26	14298	123	27	14351	87	30	14348	58	23	14347	95	25	14346	89	30	14349	43	27	14326	15	27	14349	13	25	14347	12	24	14356	11	22	14349	20	30	14352	14	24	14350	7
N2:14510	chr02	14437	14583	+21:YBL105C;	3.58911	4	98.5	9.327	14515	435	36	14518	142	38	14519	78	34	14519	67	34	14523	77	37	14527	60	42	14519	51	33				14554	5	22	14513	13	33				14539	19	28
N2:14658	chr02	14585	14731	+20:YBL105C;	3.20299	6	100	37.468	14722	370	33	14676	103	38	14724	72	36	14714	60	35	14682	76	36	14715	69	37	14696	33	35	14610	6	39							14711	6	32	14695	14	32	14686	8	28	14701	2
N2:14919	chr02	14846	14992	+18:YBL105C;	2.70976	5	100	26.048	14906	448	35	14908	109	40	14906	72	35	14903	77	34	14898	93	36	14907	65	37	14855	31	38	14883	4	23	14910	5	25	14949	9	46	14901	14	32	14905	6	39				14912	3
N2:15149	chr02	15076	15222	+17:YBL105C;	2.10616	4	35.5	42.492	15153	393	33	15154	79	35	15149	45	40	15155	32	31	15154	56	35	15153	37	39	15146	12	24				15092	6	52	15194	3	22	15148	2	2				15191	2	20	15155	3
N2:15339	chr02	15266	15412	+16:YBL105C;	4.32624	6	94.5	20.136	15342	825	31	15351	141	32	15346	141	33	15352	103	34	15350	123	33	15345	115	34	15347	51	24				15351	5	11	15373	12	36	15349	12	27	15370	17	31	15340	14	32	15347	12
N2:15540	chr02	15467	15613	+15:YBL105C;	4.20649	5	83.33	11.696	15502	567	34				15517	107	36	15530	107	33							15534	42	38	15511	2	31	15533	11	36	15566	7	24	15508	9	28	15528	4	52	15510	6	27
N2:15700	chr02	15627	15773	+14:YBL105C;	3.20409	6	97.25	31.07	15671	491	33	15664	148	32	15668	90	33	15678	77	31	15659	115	39	15681	88	35				15680	5	22				15763	6	18	15670	3	30	15698	9	31	15677	9	37	15676	4
N2:15859	chr02	15786	15932	+13:YBL105C;	2.0045	3	68.5	29.195				15916	119	42	15840	60	32	15853	48	32	15917	73	34				15917	34	41				15797	1	0	15929	13	37				15928	13	40
N2:16020	chr02	15947	16093	+12:YBL105C;	2.0329	4	77.5	27.767	15967	486	39				15998	104	41	16060	91	43				16000	95	39				16071	11	33	15993	9	36										15969	10	30	15990	4
N2:16193	chr02	16120	16266	+11:YBL105C;	2.71202	6	93.25	31.265	16247	800	28	16130	152	39	16243	152	33				16246	124	29	16240	111	33	16241	68	30	16226	13	37	16166	7	42	16136	8	32	16127	14	18	16163	15	32	16239	25	29
N2:16504	chr02	16431	16577	+9:YBL105C;	4.04299	5	57.33	12.973	16573	584	37	16539	130	33	16444	79	38	16572	75	41	16571	96	36	16507	73	37	16560	40	33	16474	8	36	16446	5	24	16564	15	27				16435	9	33	16575	19	35	16545	5
N2:16941	chr02	16868	17014	+7:YBL105C;	3.61913	4	100	8.981	16946	514	29				16947	80	30	16943	53	28	16950	57	31	16954	63	30	16898	34	33	16875	12	23	16947	8	24				16946	4	5	16950	11	22	16945	27	33	16892	14
N2:17101	chr02	17028	17174	+6:YBL105C;	4.7967	6	100	17.317	17101	600	27	17046	141	29	17100	107	27	17101	71	22				17102	75	28				17059	2	22
N2:17258	chr02	17185	17331	+5:YBL105C;	2.93374	4	100	20.516				17225	146	26	17254	84	31	17253	68	27	17233	76	26	17260	84	26	17239	46	27	17230	5	9	17240	3	5	17235	7	13	17245	4	7	17236	9	23	17231	89	27	17242	61
N2:17569	chr02	17496	17642	+3:YBL105C;	4.69505	6	92	22.833	17566	215	28	17551	83	28	17569	39	26	17566	25	31	17558	36	17	17565	40	25	17565	24	30	17556	16	25	17569	5	5	17561	6	3	17558	5	17	17566	12	23	17568	82	17	17563	99
N2:17725	chr02	17652	17798	+2:YBL105C;	4.7012	5	100	6.76	17727	485	19	17725	171	16	17722	63	25	17727	61	21	17731	73	17	17726	76	18	17725	90	19	17722	25	26				17726	11	13	17733	4	13	17722	21	23	17725	162	16	17724	250
N2:17902	chr02	17829	17975	+1:YBL105C;	5.50726	6	97	8.4	17905	395	15	17904	92	13	17902	95	20	17902	83	11	17902	71	12	17903	74	14	17906	269	14	17898	91	11	17899	29	11	17899	27	19	17904	17	9	17900	166	14	17904	187	13	17901	303
N2:18189	chr02	18116	18262	-1:YBL105C;	5.65222	6	100	6.481	18185	805	17	18190	171	17	18187	115	23	18186	110	16	18189	106	20	18197	89	18	18183	261	15	18185	12	20	18183	29	13				18193	20	14	18203	150	20	18183	21	10	18186	32
N2:18350	chr02	18277	18423		5.54682	6	94	7.688	18353	684	22	18347	178	29	18354	137	28	18354	123	19	18352	130	28	18352	127	24	18349	123	25	18361	11	23	18356	18	15	18344	18	30	18350	10	13				18361	33	21	18348	15
N2:18528	chr02	18455	18601	+17*:YBL104C;	3.83805	6	97.25	18.313	18513	333	37				18542	75	39	18512	43	36				18518	45	37	18512	61	41	18524	17	32				18532	5	13	18499	7	22	18508	26	31	18538	5	20	18531	4
N2:18705	chr02	18632	18778	+16:YBL104C;	3.90847	5	89	14.56	18688	445	35				18691	91	33	18691	105	26	18685	87	34	18693	82	29	18689	64	30				18704	10	27	18696	3	6	18696	8	43	18681	20	24	18690	11	43	18687	5
N2:18876	chr02	18803	18949	+15:YBL104C;	4.94681	5	89	2.775	18847	708	25	18833	128	32	18854	113	29	18861	108	28	18836	127	24	18859	84	27	18852	76	23	18839	14	24				18856	9	19	18864	9	24	18864	23	31	18864	12	20	18837	3
N2:19034	chr02	18961	19107	+14:YBL104C;	3.98664	5	96.67	13.221	19000	476	29	19013	131	37	19038	96	41				18992	91	29				19047	50	39	19038	6	25	18997	3	35	19010	12	22
N2:19188	chr02	19115	19261	+13:YBL104C;	3.12299	5	86.33	25.758	19148	425	38	19249	97	40	19192	74	34	19152	67	39	19151	72	36	19190	74	35	19206	36	41	19197	5	25	19187	3	31	19202	5	23	19141	1	0	19166	27	30	19151	7	40	19176	4
N2:19407	chr02	19334	19480	+12:YBL104C;	2.70143	6	92.5	33.798				19413	95	28	19408	55	43				19410	64	35	19416	59	46	19408	28	42	19401	5	42	19413	6	36	19422	8	32	19354	7	21	19406	20	38				19358	1
N2:19619	chr02	19546	19692	+11:YBL104C;	2.15575	5	96.33	36.824	19624	714	30	19604	199	31	19613	154	33	19634	98	29	19610	125	30	19609	96	30	19610	85	27	19596	11	27	19601	7	24	19593	15	27	19597	6	12	19658	22	32	19598	18	26	19608	7
N2:19831	chr02	19758	19904	+10:YBL104C;	2.37851	4	100	31.739	19783	491	36	19764	147	30	19813	115	35	19808	87	30	19771	91	26	19816	83	35	19762	56	29	19761	7	12	19769	5	23	19811	7	19	19808	3	8	19812	16	32	19777	19	27	19811	8
N2:19980	chr02	19907	20053	+9:YBL104C;	3.05273	5	87	25.652	19968	467	31	19928	117	44	19971	81	26	19972	102	30	19961	97	28	19970	91	30	19970	46	38	20051	9	28	19975	9	33	19982	12	29				19964	11	33	19968	13	26
N2:20142	chr02	20069	20215	+8:YBL104C;	2.74307	4	83.5	23.072	20146	434	36	20088	150	36													20158	40	34				20143	8	40				20093	6	45				20150	5	33	20082	6
N2:20294	chr02	20221	20367	+7:YBL104C;	3.60154	4	100	9.274	20303	850	31	20253	225	40	20292	171	30	20296	138	25	20270	145	30	20292	126	31	20308	104	33	20256	12	23				20271	15	27	20293	7	18	20286	45	31				20278	19
N2:20448	chr02	20375	20521	+6:YBL104C;	5.18461	6	100	11.286				20420	153	37	20449	76	28	20451	60	27	20433	69	28	20454	72	26				20435	18	11	20433	10	28	20442	8	23	20444	6	37	20446	22	29	20422	55	23	20453	11
N2:20613	chr02	20540	20686	+5:YBL104C;	5.88633	6	100	3.619	20611	941	21	20604	279	27	20611	138	23	20612	144	22	20609	162	22	20614	134	21	20610	115	21	20605	25	22	20612	16	23	20606	22	26	20611	6	29	20606	29	25	20607	130	20
N2:20769	chr02	20696	20842	+4:YBL104C;	3.02151	4	73	14.989				20754	160	25	20778	85	28	20760	68	18	20757	89	23							20757	15	17				20766	8	6	20760	5	19							20755	98
N2:20925	chr02	20852	20998	+3:YBL104C;	3.76291	5	100	15.255	20923	406	19	20909	113	26				20910	48	26	20917	65	27	20929	47	31	20917	97	25				20953	9	25	20914	1	0				20920	44	27	20918	128	23	20928	149
N2:21084	chr02	21011	21157	+2:YBL104C;	5.63163	6	83.25	6.706	21079	247	30	21089	77	32	21080	41	29	21075	35	33	21078	48	33	21082	54	27	21086	61	27	21096	10	20				21085	3	11	21077	16	23	21080	36	17	21080	90	28	21084	165
N2:21258	chr02	21185	21331	+1:YBL104C;	5.3458	6	100	9.416	21258	364	18	21259	89	22	21257	55	14	21254	62	14	21255	53	18	21255	50	17	21257	157	17	21262	27	15	21252	12	7	21266	14	13	21264	9	14	21259	53	18	21259	139	15	21263	172
N2:21498	chr02	21425	21571	-1:YBL104C;	3.93051	6	94.5	18.577	21514	335	24	21513	124	27	21516	50	30	21521	60	26	21515	71	28	21521	51	21	21520	139	29	21494	27	27	21510	19	30	21534	8	26	21497	19	22	21519	79	27	21508	14	17	21498	35
N2:21679	chr02	21606	21752		2.85047	4	80.5	24.226	21684	377	26	21680	106	33	21684	56	21	21684	59	24	21680	50	24	21687	53	17	21682	49	24	21675	11	22										21679	16	16	21708	1	0	21704	6
N2:21855	chr02	21782	21928	+12*:YBL103C;	2.93522	3	100	4.359	21917	365	39	21845	62	33	21842	48	32	21851	61	37	21845	38	32	21908	42	30	21918	33	33				21842	3	30	21919	3	1	21823	3	18	21855	10	28	21861	11	28	21921	1
N2:22005	chr02	21932	22078	+11:YBL103C;	3.49926	4	67.33	10.34				22002	74	32	22025	54	32	22003	38	39	22013	58	29	22058	60	39				21948	6	39	22056	4	39	22076	4	28	22010	5	29	22022	7	26
N2:22210	chr02	22137	22283	+10:YBL103C;	2.83693	5	91.75	42.886	22276	425	39	22220	153	33	22249	100	41	22215	92	39	22223	101	39	22218	62	38	22194	44	35	22277	5	14	22269	16	40	22254	1	0	22226	4	30	22222	19	35	22266	13	36	22239	4
N2:22452	chr02	22379	22525	+9:YBL103C;	3.09789	6	87.5	26.788	22441	355	36	22419	120	32	22423	53	42				22421	52	33	22420	64	39	22449	26	41	22439	7	30	22450	5	18	22436	4	14				22488	14	35	22474	13	35	22422	4
N2:22608	chr02	22535	22681	+8:YBL103C;	3.47465	5	83	19.609	22620	353	30	22593	97	27				22606	73	28	22607	61	32	22610	65	33	22636	18	36				22631	8	17	22623	1	0	22594	2	23				22626	29	21	22613	6
N2:22771	chr02	22698	22844	+7:YBL103C;	1.04741	2	100	30.406	22772	577	34	22744	203	31	22765	101	32	22765	93	30	22757	111	32	22772	110	39	22785	59	42	22758	16	26				22773	10	22	22746	9	20	22829	18	38	22786	52	32	22765	18
N2:22926	chr02	22853	22999	+6:YBL103C;	4.9547	6	100	15.188	22933	412	28	22913	144	34	22932	65	32	22931	56	33	22930	68	35	22933	71	26				22924	14	26	22946	10	25	22933	8	22	22911	3	35				22937	54	22	22923	25
N2:23084	chr02	23011	23157	+5:YBL103C;	4.61996	5	98	7.791	23088	798	25	23087	175	22	23094	162	27	23092	144	19	23090	99	22	23094	126	27	23091	63	27	23087	7	7	23132	15	19	23090	5	26	23087	16	28	23097	24	28	23090	231	19	23088	123
N2:23247	chr02	23174	23320	+4:YBL103C;	4.57302	5	100	8.198	23249	292	24	23250	89	23	23261	73	28	23258	46	24	23254	55	19	23256	49	22	23260	47	23	23244	8	9				23257	5	6	23245	6	34	23258	26	26	23246	107	19	23250	117
N2:23410	chr02	23337	23483	+3:YBL103C;	5.93176	6	100	2.805	23421	492	23	23415	148	26	23423	107	24	23421	59	21	23422	89	21	23425	78	26	23421	93	21	23407	17	15	23423	8	18	23419	20	18	23417	7	9	23423	42	16	23418	253	18	23419	256
N2:23563	chr02	23490	23636	+2:YBL103C;	3.97415	4	79.5	2.217	23581	218	26	23584	60	26	23588	33	26	23589	45	25	23582	43	24	23578	43	26	23575	79	25				23593	4	17	23572	8	14	23590	4	15				23586	68	23	23575	131
N2:23746	chr02	23673	23819	-1:YBL102W; +1:YBL103C;	5.96573	6	100	2	23746	422	15	23745	112	17	23746	88	13	23746	97	19	23748	87	19	23748	107	15	23746	298	12	23743	30	24	23747	20	15	23745	11	12	23745	21	11	23741	27	16	23746	187	12	23745	296
N2:24196	chr02	24123	24269	+2:YBL102W;	4.78376	6	89.5	15.039	24182	463	20	24202	106	30	24186	75	27	24207	66	28	24203	87	25	24209	67	28				24207	42	20				24203	33	35	24195	22	24	24182	167	25	24185	285	19
N2:24353	chr02	24280	24426	+3:YBL102W;	2.92853	3	100	4.583	24354	224	29	24358	47	32	24349	58	30				24359	33	32				24354	189	29	24355	32	27	24354	16	19	24353	23	33	24343	16	21	24346	131	26	24354	99	20	24349	108
N2:24516	chr02	24443	24589	+4:YBL102W;	4.5358	5	85.33	8.786	24515	331	26	24509	121	31	24507	60	29	24519	48	28	24521	61	24	24507	57	32	24530	206	25	24540	36	19	24506	24	28	24540	29	29	24533	23	27	24528	110	26	24518	141	24	24502	152
N2:24686	chr02	24613	24759	+5:YBL102W;	5.00356	6	100	14.648	24681	692	30	24716	275	28	24682	132	29	24686	101	29	24719	137	27	24694	109	28	24680	172	29				24732	13	26	24691	14	24	24734	14	26	24679	63	25	24682	87	23	24685	84
N2:24857	chr02	24784	24930	+6*:YBL102W;	2.02929	3	67	20.298							24872	13	33							24866	3	28				24801	8	31
N2:25023	chr02	24950	25096	+22*:YBL101C;	3.92152	6	93	30.38	25018	175	31	24974	53	30	25024	54	32	25038	32	36	25025	42	28	25025	39	31	25019	45	29	25016	8	20	25062	2	0	25038	2	0	24960	9	37	25025	21	29	25013	13	21	25074	2
N2:25182	chr02	25109	25255	+21:YBL101C;	3.07559	6	100	37.356	25225	453	36	25159	107	36	25241	90	34	25223	84	32	25227	103	35	25221	89	35	25203	105	33	25175	10	34	25241	6	23	25186	13	41	25148	1	0	25236	28	33	25218	13	34	25222	12
N2:25382	chr02	25309	25455	+20:YBL101C;	4.7284	5	100	6.348	25393	418	39	25373	121	38	25392	91	41	25408	66	37													25409	8	24				25380	5	22	25387	14	41	25368	13	33
N2:25538	chr02	25465	25611	+19:YBL101C;	3.60896	5	91.67	16.223	25554	505	35	25557	91	35	25546	77	37	25559	64	37	25562	104	40	25558	74	33	25538	63	27	25507	9	31	25572	7	36	25536	9	32				25555	27	40	25522	15	25	25579	9
N2:25705	chr02	25632	25778	+18:YBL101C;	2.87442	5	100	25.764	25710	582	36	25712	131	36	25700	119	36	25712	93	34				25724	83	36	25714	55	35	25698	10	20							25689	6	28				25724	12	32
N2:25992	chr02	25919	26065	+16:YBL101C;	4.71015	5	100	6.693	25965	581	37	25999	158	31	25999	104	33	25972	111	33	25973	148	34	25970	97	33	25963	52	34	25983	8	44	25966	4	32				25936	3	14	26043	16	31	26034	12	28	25976	11
N2:26202	chr02	26129	26275	+15:YBL101C;	3.49503	6	99.25	33.963	26209	399	43							26143	53	38	26141	66	43	26142	58	37	26147	35	39	26145	6	23	26135	2	20				26157	4	9	26243	6	35				26142	6
N2:26442	chr02	26369	26515	+14:YBL101C;	3.37357	5	78	18.147	26459	496	38	26464	76	37	26455	90	35	26465	79	36	26484	84	41	26452	86	36				26464	6	44							26371	6	29	26448	7	35	26482	15	44
N2:26624	chr02	26551	26697	+13:YBL101C;	2.00667	4	50.5	32.623	26640	352	42	26631	109	37	26637	44	38	26642	44	35										26639	12	31							26625	5	17	26632	4	33	26649	18	35
N2:26886	chr02	26813	26959	+11:YBL101C;	2.12311	4	77	32.305	26844	569	36	26848	108	36	26842	87	36	26848	82	40	26858	112	44	26847	85	38	26848	92	33	26850	6	26	26948	3	9	26876	5	27							26849	33	33
N2:27058	chr02	26985	27131	+10:YBL101C;	2.5689	5	96.33	27.208	27048	541	39	27052	131	41	27055	95	39	27049	89	45	27052	117	43	27056	103	44	27055	68	29	27044	8	24				27057	3	47	27024	2	25	26998	8	35	27058	39	32	27041	61
N2:27334	chr02	27261	27407	+8:YBL101C;	3.91896	5	83.75	14.464	27337	442	36	27276	137	37	27290	96	36	27282	76	39	27262	101	39	27281	97	33	27349	63	42	27343	10	38	27347	9	45	27287	13	32				27333	11	40	27327	57	34	27282	78
N2:27502	chr02	27429	27575	+7:YBL101C;	4.15018	5	99	11.929	27507	419	31				27515	80	35	27514	49	37	27514	93	35	27432	48	39	27513	68	32	27509	6	7	27574	9	26	27508	11	33				27526	23	31	27511	79	33
N2:27668	chr02	27595	27741	+6:YBL101C;	2.35532	5	80	30.517	27671	336	36										27674	53	39													27716	4	46	27614	8	38
N2:27873	chr02	27800	27946	+5:YBL101C;	3.18551	5	64	27.664	27871	356	35	27893	93	37	27808	57	37	27800	47	40	27859	71	34	27867	59	40	27816	74	32				27811	16	43							27803	38	44	27810	117	35
N2:28033	chr02	27960	28106	+4:YBL101C;	2.99644	4	100	21.093										27972	31	40	28017	59	35	28030	60	37	27989	98	36	27963	29	28	27962	33	26	27965	37	31	27967	20	34	27961	102	35	28032	150	35	27980	144
N2:28204	chr02	28131	28277	+3:YBL101C; -1:YBL100W-C;	4.55748	6	100	16.364	28166	322	36	28180	87	37	28151	58	35	28151	26	36	28174	55	33	28200	48	42	28161	129	37	28153	94	33	28217	41	34	28152	48	29	28152	30	33	28215	210	40				28151	209
N2:28375	chr02	28302	28448	+2:YBL101C; +1:YBL100W-C;	4.58932	6	99.25	14.963	28349	216	33	28347	38	38	28360	11	34	28360	12	37							28342	115	32	28415	52	44	28430	8	28	28405	9	31	28337	18	24				28344	68	36	28334	117
N2:28586	chr02	28513	28659	+1:YBL101C; +2*:YBL100W-C;	4.98534	6	100	15.398	28584	330	27	28591	95	23	28590	55	30	28586	33	19	28589	51	30	28602	34	26	28585	280	25	28588	168	38	28584	64	27	28596	32	30	28591	50	26	28587	189	30	28583	95	27	28590	160
N2:28789	chr02	28716	28862	-1:YBL101C;	2.29941	4	100	33.33	28803	142	37	28769	34	43	28762	15	39	28800	6	39				28754	6	40	28848	69	41				28854	3	21							28784	66	41	28802	4	17	28790	11
N2:29122	chr02	29049	29195		3.68971	4	100	8.124	29120	442	16	29120	124	18	29119	43	17	29120	19	16	29123	34	16	29120	66	18	29120	125	14	29122	32	17	29119	78	15	29119	62	13	29116	30	19	29121	60	26	29120	20	8	29119	29
N2:29279	chr02	29206	29352		5.62245	6	100	6.89	29282	516	25	29280	104	27	29281	61	30	29282	38	27	29279	33	32	29281	79	26	29283	100	28	29280	15	24	29285	27	24	29279	57	27	29278	34	27	29279	42	21	29282	11	23	29282	51
N2:29454	chr02	29381	29527		2.8887	5	81.67	22.687	29438	319	34													29435	65	28	29435	60	36	29432	7	18	29466	15	34	29515	23	34	29442	11	19	29432	18	22	29435	11	34
N2:29626	chr02	29553	29699		3.63538	4	89.5	8.921	29612	466	26	29555	141	30	29560	56	34	29559	44	30	29557	45	40				29612	82	30	29624	15	38							29609	13	27	29606	13	25				29566	108
N2:29931	chr02	29858	30004		2.80683	3	100	7.638
N2:30146	chr02	30073	30219		1.76565	3	100	36.51	30076	1	0
N2:30399	chr02	30326	30472		2.71498	4	50	23.627	30409	2	14																30399	2	1																			30416	3
N2:30577	chr02	30504	30650		2.56326	4	50	25.552	30580	1	0																30580	1	0
N2:30853	chr02	30780	30926		1.96087	4	50	53.325													30833	1	0	30844	2	6
N2:31103	chr02	31030	31176		1.81194	3	100	23.029
N2:31420	chr02	31347	31493		3.21878	4	50	13.817
N2:31593	chr02	31520	31666		1.79005	2	-1	11.314
N2:31889	chr02	31816	31962		2.49119	3	100	13.013
N2:32085	chr02	32012	32158		2.12267	4	50	29.331
N2:32247	chr02	32174	32320		1.77966	3	100	25.239
N2:32458	chr02	32385	32531		1.52546	3	100	43.132
N2:32634	chr02	32561	32707		1.62698	3	100	33.606
N2:32796	chr02	32723	32869		2.91814	4	50	26.994	32746	9	13	32866	2	3													32742	3	6	32852	1	0										32814	8	26
N2:32989	chr02	32916	33062		2.69134	3	100	9.866
N2:33238	chr02	33165	33311		2.37432	3	100	14.844				33277	2	4
N2:33424	chr02	33351	33497		1.93394	3	100	28.16
N2:33615	chr02	33542	33688		2.1437	4	50	32.512
N2:33917	chr02	33844	33990		3.37195	4	50	11.558
N2:34195	chr02	34122	34268		2.21203	3	100	17.088	34246	3	1	34231	4	10	34249	1	0				34238	2	8	34237	2	10																			34227	1	0
N2:34450	chr02	34377	34523		1.06192	3	0	51.862	34443	3	5				34445	1	0				34437	1	0	34447	2	1
N2:34661	chr02	34588	34734		2.62857	4	50	28.775	34657	114	2	34658	22	4	34657	10	1	34659	11	7	34658	11	4	34659	9	5	34657	12	0	34661	2	9							34656	1	0				34659	2	7	34657	1
N2:34930	chr02	34857	35003		1.13395	3	100	43.139
N2:35133	chr02	35060	35206		1.55845	3	100	43.267
N2:35540	chr02	35467	35613		3.32593	4	100	11.955	35560	93	15				35561	6	6				35564	6	5	35561	15	6	35559	31	14	35561	9	6	35557	6	6				35557	5	5				35553	2	1
N2:35717	chr02	35644	35790		4.89542	6	99.25	12.766				35703	66	25				35692	21	28	35730	24	21													35703	10	26	35716	6	12	35701	13	22	35742	7	18	35699	64
N2:35906	chr02	35833	35979		2.214	4	76.5	22.428	35872	204	21	35858	66	25	35866	30	25	35848	18	21				35867	39	23	35871	59	19	35845	21	15	35850	25	17	35873	24	26				35860	8	27				35864	92
N2:36067	chr02	35994	36140		2.88434	3	100	5.859
N2:36232	chr02	36159	36305		5.44318	6	100	9.004	36236	142	21	36224	60	20	36219	13	19	36222	5	17	36229	10	20	36227	37	24	36245	43	22	36226	26	13	36244	9	19	36223	4	16	36211	2	0	36237	17	17	36245	9	20	36225	50
N2:36416	chr02	36343	36489		2.87801	4	50	19.956	36383	3	7	36414	6	21	36385	2	3	36412	5	28	36415	3	9	36391	1	0	36427	2	10				36437	1	0	36434	1	0
N2:36587	chr02	36514	36660	-1:YBL099W;	2.78073	3	89.5	8.185	36561	5	23	36569	4	12	36576	1	0	36574	4	25	36610	3	18				36579	5	19										36593	1	0	36518	3	6
N2:36767	chr02	36694	36840	+1:YBL099W;	5.41592	6	83.75	8.602	36775	98	27							36771	25	27	36785	30	26	36775	17	19	36784	155	28	36774	165	30	36783	18	24	36779	4	26	36764	6	27	36777	40	26	36776	43	24	36778	60
N2:36944	chr02	36871	37017	+2:YBL099W;	4.33262	5	81.67	10.559	36941	316	16	36940	64	29	36942	29	33	36940	68	16	36940	81	14	36941	66	14	36941	210	20	36940	61	25	36941	14	16	36937	15	11	36946	11	13	36942	33	26	36941	178	12	36942	123
N2:37116	chr02	37043	37189	+3:YBL099W;	3.89464	6	91.75	31.485	37122	322	20	37127	100	23	37123	59	30	37126	41	24	37126	76	17	37124	73	16	37123	125	19	37129	30	25	37119	12	26	37089	7	24	37125	15	19	37124	47	24	37124	195	15	37124	192
N2:37266	chr02	37193	37339	+4:YBL099W;	3.76061	4	100	6.994																																		37272	24	38
N2:37425	chr02	37352	37498	+5:YBL099W;	4.21857	6	75.5	30.792										37423	48	36	37435	70	32							37358	16	35	37352	8	25	37354	8	27	37421	5	14	37423	30	32	37430	123	35
N2:37586	chr02	37513	37659	+6:YBL099W;	3.82591	4	78	5.909	37586	234	37	37516	88	39	37589	63	40	37586	54	34	37585	94	34	37586	67	39	37584	38	41	37514	10	10	37603	6	42	37529	8	24	37584	6	7	37576	24	32	37586	109	40	37582	157
N2:37870	chr02	37797	37943	+8:YBL099W;	3.15707	6	82.5	37.616	37920	304	32	37849	106	32	37826	69	37	37853	56	40	37923	100	30	37878	70	37	37840	30	29	37814	4	28	37879	7	36	37868	7	24	37835	2	1	37922	24	34	37922	75	34	37868	154
N2:38046	chr02	37973	38119	+9:YBL099W;	3.03185	5	80	29.744				38052	93	35	38044	73	35	38046	59	34	38081	85	38	38039	63	34	38076	39	34	38046	5	28				38053	6	34	38056	5	22				38069	55	29	38049	73
N2:38258	chr02	38185	38331	+10:YBL099W;	2.8915	6	82.75	37.227	38250	236	40	38255	81	34	38265	77	41				38255	123	29	38249	52	30	38234	31	42				38221	11	32	38303	1	0	38220	5	26				38255	22	26
N2:38432	chr02	38359	38505	+11:YBL099W;	3.38285	4	79.67	12.45				38408	82	39	38450	55	43				38413	93	39				38456	18	34				38380	5	20				38383	2	25	38386	20	34
N2:38623	chr02	38550	38696	+12:YBL099W;	3.3613	5	61.33	18.815				38637	61	40	38625	32	32				38597	77	42				38621	17	30				38593	2	29				38567	4	1	38550	11	34				38695	3
N2:38928	chr02	38855	39001	+14*:YBL099W; -1:YBL098W;	2.96746	6	49.5	38.83	38945	89	28	38943	39	25	38997	10	34	38941	19	40	38945	13	29	38954	16	26				38928	4	37				38940	1	0	38913	2	6	38958	6	19
N2:39170	chr02	39097	39243	+1:YBL098W;	5.73978	6	98.25	5.636	39181	623	20	39188	145	25	39180	96	26	39183	92	21	39189	86	26	39177	83	22	39177	72	24	39184	11	21	39174	6	18	39188	16	18	39190	10	15	39181	27	22	39183	44	20	39173	159
N2:39355	chr02	39282	39428	+2:YBL098W;	4.23972	6	100	18.36	39358	679	22	39355	191	23	39355	117	27	39356	89	26	39355	136	19	39353	95	22	39359	90	24	39346	17	23	39361	8	18	39358	11	23	39357	16	16	39351	19	30	39357	60	22	39356	109
N2:39640	chr02	39567	39713	+4:YBL098W;	4.42591	6	100	22.489	39646	595	29	39643	174	32	39649	107	30	39649	83	26	39645	97	30	39645	85	25	39644	98	34	39637	20	23	39636	6	40				39640	6	25	39647	27	25	39658	52	25	39660	40
N2:39823	chr02	39750	39896	+5:YBL098W;	3.60199	6	100	23.586	39856	413	37	39800	95	35	39808	59	33	39818	44	34	39866	58	37	39810	72	26	39802	64	30	39835	4	6	39811	6	7				39812	5	30	39812	73	28
N2:40041	chr02	39968	40114	+6:YBL098W;	5.79469	6	100	4.956	40030	418	33				40025	59	32	40024	36	33	40027	64	33				40028	81	30	40088	11	31	40020	7	25	39995	6	18	40022	4	25	40039	56	32				40022	5
N2:40199	chr02	40126	40272	+7:YBL098W;	4.62301	5	87	7.635	40188	647	27	40191	138	27	40184	79	24	40188	55	30	40184	86	24	40186	78	29	40189	95	25				40175	6	31	40212	3	18	40176	3	4	40191	39	27	40192	14	23	40195	7
N2:40362	chr02	40289	40435	+8:YBL098W;	2.93522	3	89	4.359	40355	328	24				40354	49	20	40359	72	17	40356	45	22	40354	55	16	40355	58	21				40340	3	23				40349	4	14				40350	6	12	40357	12
N2:40518	chr02	40445	40591	+9*:YBL098W; -1:YBL097W;	4.31391	6	100	19.062	40514	559	17	40510	197	15	40509	72	21	40506	34	24	40509	78	21	40508	61	17	40507	79	16	40507	15	8	40508	8	11	40501	20	9	40505	3	3	40508	18	13	40517	15	15	40511	23
N2:40803	chr02	40730	40876	+1:YBL097W;	4.34837	5	67.33	10.368	40800	550	16	40798	168	17	40799	86	19	40799	79	15	40799	83	17	40799	72	18	40800	122	14	40800	8	23	40797	14	9	40798	27	6	40803	12	10	40798	19	7	40801	106	13	40797	235
N2:40967	chr02	40894	41040	+2:YBL097W;	4.83119	5	96.33	5.07	40969	299	20	40968	138	18	40969	42	24	40964	60	17	40965	59	17	40969	48	19	40965	39	13	40966	4	9	40966	3	32	41039	3	30	40975	4	11	40995	7	17	40967	97	9	40969	194
N2:41147	chr02	41074	41220	+3:YBL097W;	5.69385	6	100	6.047	41150	716	20	41152	258	21	41148	140	24	41135	89	22	41150	144	23	41144	155	22	41147	122	21	41142	12	22	41151	12	30				41146	13	25	41144	34	23	41150	318	17	41141	360
N2:41303	chr02	41230	41376	+4:YBL097W;	4.93176	5	100	3.162	41301	628	17	41301	227	18	41299	99	21	41299	76	19	41302	99	21	41303	85	17	41298	75	24	41293	10	21	41303	6	28	41281	12	12	41311	5	31	41302	22	14	41302	124	14	41302	155
N2:41463	chr02	41390	41536	+5:YBL097W;	5.77598	6	100	5.164	41465	538	20	41469	181	17	41463	91	22	41464	102	19	41464	88	15	41467	99	16	41466	54	24	41455	7	8	41462	4	11	41455	1	0	41462	3	3	41471	14	10	41464	66	13	41461	56
N2:41617	chr02	41544	41690	+6:YBL097W;	3.67338	5	69.67	17.981	41613	335	23	41638	100	27	41617	49	31	41611	27	25	41618	45	29	41619	24	29	41615	37	23	41658	4	24	41611	4	26	41638	3	11										41609	8
N2:41774	chr02	41701	41847	+7:YBL097W;	4.8017	5	99	5.413	41784	420	30	41785	134	37	41780	60	30	41780	55	26	41780	75	27	41784	55	28	41785	57	30				41789	5	25							41775	9	31	41796	15	18	41790	14
N2:41941	chr02	41868	42014	+8:YBL097W;	4.91766	6	100	15.829	41945	535	35	41980	146	33	41938	106	34	41950	92	31	41936	100	39	41979	90	30	41946	58	38	41958	6	28				41906	5	39	41925	14	12	41937	34	30				41939	8
N2:42110	chr02	42037	42183	+9:YBL097W;	3.48381	6	94.75	24.991	42112	475	28	42160	99	42	42102	91	35	42108	47	30	42107	73	31				42115	64	34				42105	6	25	42070	5	33	42110	1	0	42165	12	39				42109	1
N2:42295	chr02	42222	42368	+10:YBL097W;	1.65824	4	33	30.026	42280	275	37													42335	69	36	42290	37	36	42285	5	19	42283	1	0	42281	4	20	42299	4	21	42326	27	49	42234	9	20	42319	1
N2:42466	chr02	42393	42539	+11:YBL097W;	2.52328	6	92.75	45.91	42457	486	36	42399	99	41	42394	68	40	42393	86	38	42395	82	37	42535	80	39	42465	118	32	42536	10	30	42469	3	25				42468	3	35	42482	26	37	42455	14	31	42538	9
N2:42660	chr02	42587	42733	+3*:CUT443; +12:YBL097W;	4.20711	6	100	35.926	42627	376	38	42695	109	34				42689	40	30				42696	48	32	42624	165	35	42684	15	24							42645	6	22	42685	16	34	42627	26	36
N2:42839	chr02	42766	42912	+2:CUT443; +13:YBL097W;	4.64967	5	100	7.503	42810	264	35	42847	89	23	42852	60	29	42845	41	24	42849	40	24	42844	39	18	42810	125	35	42847	11	14	42845	7	23	42843	3	15	42842	6	30	42833	16	23	42806	18	28	42836	6
N2:43016	chr02	42943	43089	+1:CUT443; +14:YBL097W; -1:YBL095W;	5.37574	6	97.25	9.288	43004	143	31	43017	107	21	43013	61	24	43015	42	15	43013	42	21	43013	41	14	42959	239	32	43019	25	24	43013	3	14	43010	9	32	43007	13	17	43012	56	22	43005	19	30	43014	40
N2:43305	chr02	43232	43378	-1:CUT443; +16:YBL097W; +1:YBL095W;	5.06951	6	95.25	11.639	43304	134	24	43310	40	22	43312	29	23	43304	29	21	43303	20	25	43293	26	28	43312	119	23	43291	67	24	43313	20	19	43242	4	27	43304	17	23	43310	61	21	43308	77	25	43301	120
N2:43478	chr02	43405	43551	+17:YBL097W; +2:YBL095W;	4.89448	5	100	3.962	43476	394	24	43474	184	19	43473	95	27	43468	66	22	43469	147	22	43475	99	19	43478	169	23	43478	40	19	43481	34	22	43464	23	22	43480	31	18	43478	100	22	43475	233	22	43472	460
N2:43646	chr02	43573	43719	+18:YBL097W; +3:YBL095W;	5.14227	6	86.5	10.759				43648	153	21	43644	79	22				43654	74	28	43649	83	22	43648	118	24	43650	33	13	43657	18	22	43639	16	17	43649	18	19	43652	64	26	43649	178	20	43648	164
N2:43795	chr02	43722	43868	+19:YBL097W; +4:YBL095W;	3.40666	4	100	11.529	43791	497	27	43811	168	25				43779	80	27				43808	112	26	43812	137	33	43800	22	29	43805	17	30	43806	17	26				43806	27	28				43810	110
N2:43951	chr02	43878	44024	+20:YBL097W; +5:YBL095W;	4.7804	6	97.75	13.353							43935	70	32	43944	38	29	43937	62	27													43979	4	42	43924	15	26	43961	23	20	43934	61	32	43967	22
N2:44139	chr02	44066	44212	+6*:YBL093C; +21*:YBL097W; +6:YBL095W;	3.23786	4	94.5	14.201	44160	116	37	44163	43	41	44156	19	30				44159	22	36	44150	19	35				44140	9	16	44091	3	17				44117	3	19	44135	6	36	44158	15	36	44162	14
N2:44309	chr02	44236	44382	+5:YBL093C; +7*:YBL095W;	2.76471	5	57.67	35.928	44313	350	33				44312	57	29	44243	29	37				44307	62	28	44249	44	39	44323	20	28	44254	7	22	44253	11	40				44304	42	30	44311	102	26	44314	51
N2:44476	chr02	44403	44549	+4:YBL093C;	4.74961	5	100	6.205	44466	439	30	44462	167	27	44469	83	29	44460	62	25	44454	67	29	44456	97	27	44467	142	30				44461	20	42	44460	26	33	44469	22	23	44464	45	25	44467	179	23	44465	165
N2:44638	chr02	44565	44711	+3:YBL093C;	4.64402	5	92.67	7.335	44640	581	23	44641	160	27	44637	108	24	44640	66	17	44636	114	21	44627	121	23	44639	219	20	44622	21	19	44642	32	17	44642	26	13	44631	17	17	44622	73	17	44637	279	20	44641	343
N2:44813	chr02	44740	44886	+2:YBL093C;	5.34331	6	100	9.245	44799	658	21	44804	263	22	44799	150	22	44802	79	20	44797	172	18	44790	138	21	44800	341	23	44810	69	22	44799	39	19	44794	32	14	44803	16	22	44785	109	24	44802	390	19	44804	472
N2:44983	chr02	44910	45056	+1:YBL093C;	4.29897	5	100	10.663	44994	277	24	44998	128	22	44976	50	25	44964	41	26	44975	72	28	44963	46	25	44993	314	25				44967	29	18	44967	8	22	44997	12	24	44951	69	26	44994	111	24	44993	205
N2:45242	chr02	45169	45315	-1:YBL093C; +2*:SUT437;	1.00544	3	50	63.689	45210	3	10							45222	1	0	45237	2	2				45278	4	30													45308	7	34	45178	1	0
N2:45431	chr02	45358	45504	+1:SUT437; -1:YBL092W;	1.85812	2	100	9.192	45481	5	34	45388	10	32				45397	6	47				45493	3	31	45463	8	31							45400	1	0				45465	6	24				45383	1
N2:45646	chr02	45573	45719	-1:SUT437; +1:YBL092W;	3.37041	5	70.67	20.707	45653	150	26	45600	83	37	45586	28	29										45657	418	25	45621	39	37	45632	8	9	45654	1	0	45661	7	41				45654	99	24	45609	154
N2:45798	chr02	45725	45871	+2:YBL092W;	2.43308	6	78	42.023				45770	121	33	45766	80	33	45768	60	28	45756	62	34	45778	50	29				45796	38	27				45839	6	12				45770	80	30	45815	144	28	45771	258
N2:46030	chr02	45957	46103	+3*:YBL092W;	2.39776	4	89	35.864	46035	186	38	46032	102	41							46041	44	34				45975	68	34	46018	22	35				46034	12	34				46087	24	34	45977	73	34
N2:46291	chr02	46218	46364		2.83179	5	64.33	34.419	46291	199	32	46299	151	23	46297	74	27	46293	58	28	46288	96	28	46288	57	23	46284	64	32	46294	20	25	46296	10	24	46255	17	39	46273	4	27	46275	44	25	46292	83	30	46293	289
N2:46644	chr02	46571	46717	+4:YBL091C-A; -1:SUT005;	5.79678	6	100	4.889	46638	260	27	46635	134	19	46639	78	22	46645	44	25	46633	69	21	46636	69	18	46639	170	26	46629	55	16	46637	19	18	46642	13	23	46635	9	19	46630	112	24	46639	139	21	46636	176
N2:46811	chr02	46738	46884	+3:YBL091C-A; +1:SUT005;	5.64985	6	100	6.481	46812	590	20	46812	225	21	46810	125	21	46817	73	16	46814	143	23	46808	116	23	46813	406	21	46808	49	18	46812	61	22	46815	44	16	46807	22	16	46803	119	20	46812	401	19	46805	448
N2:46967	chr02	46894	47040	+2:YBL091C-A; +2:SUT005;	5.24489	6	100	9.973	46973	162	26	46969	77	28	46969	32	24	46978	18	28	46971	33	21	46966	26	26	46971	73	32	46979	17	14	46976	26	20	46968	15	18	46962	11	30	46961	47	20	46972	66	16	46968	125
N2:47141	chr02	47068	47214	+1:YBL091C-A; +3*:SUT005;	5.69506	6	95.25	6.022	47140	405	18	47140	140	18	47140	82	25	47138	59	22	47136	71	21	47140	55	18	47143	183	19	47141	64	20	47134	20	19	47144	34	19	47136	17	19	47145	216	22	47139	158	16	47141	312
N2:47375	chr02	47302	47448	0:YBL091C-A; +8*:YBL091C;	5.42091	6	100	8.71	47380	471	25	47384	222	25	47380	72	27	47382	45	26	47389	82	29	47381	87	20	47380	131	22	47379	57	17	47386	29	20	47379	31	25	47391	21	18	47384	139	25	47381	31	31	47375	39
N2:47543	chr02	47470	47616	-1:YBL091C-A; +7:YBL091C;	4.55584	5	92.33	8.337				47540	142	30	47532	90	33	47542	38	23													47544	15	27	47550	18	34	47573	27	40	47544	70	29	47531	24	33	47542	17
N2:47725	chr02	47652	47798	+6:YBL091C;	3.67841	6	88.5	28.291	47725	394	44	47726	123	41	47726	59	41	47724	38	42	47724	65	29	47717	67	37	47724	76	40	47734	17	34	47719	13	34	47714	27	37	47723	13	31	47725	43	41	47721	23	36	47723	20
N2:47910	chr02	47837	47983	+5:YBL091C;	4.29166	6	100	20.213	47914	471	31	47929	160	26	47919	84	32	47915	53	29	47938	78	32	47923	73	32	47940	86	31	47914	15	22	47929	15	33	47918	16	27	47929	13	23	47884	41	41	47926	60	28	47907	33
N2:48097	chr02	48024	48170	+4:YBL091C;	3.91207	5	100	13.594	48099	487	26	48106	211	26	48092	92	29	48085	45	27	48102	63	23	48100	77	24	48097	102	28	48115	28	30	48104	14	28	48070	29	23	48081	17	22	48098	62	26	48110	72	26	48107	76
N2:48269	chr02	48196	48342	+3:YBL091C;	5.00262	6	100	13.638	48271	545	18	48279	184	24	48272	98	22	48273	63	20	48279	112	23	48273	96	20	48273	220	19	48283	25	27	48272	35	19	48269	24	24	48268	13	25	48270	74	20	48272	235	17	48276	273
N2:48434	chr02	48361	48507	+2:YBL091C;	5.20226	6	63.5	11.343	48430	270	27	48433	94	36	48434	47	31	48431	25	34	48432	39	32	48433	34	31	48434	150	22	48435	20	29	48434	17	28	48434	6	19	48433	6	32	48429	83	24	48431	84	23	48434	171
N2:48590	chr02	48517	48663	-1:YBL090W; +1:YBL091C;	5.29472	6	100	9.538	48597	372	27	48587	137	36	48593	60	28	48592	73	24	48586	78	27	48587	88	24	48595	326	23	48591	81	40	48594	25	24	48596	28	20	48594	17	27	48593	91	27	48598	184	20	48601	236
N2:48843	chr02	48770	48916	+1:YBL090W; -1:YBL091C;	5.53793	6	93.75	7.74	48840	387	15	48847	119	20	48841	89	20	48842	91	15	48845	71	20	48845	89	16	48841	374	15	48836	65	28	48844	31	20	48838	15	16	48838	12	22	48842	91	19	48842	262	12	48841	424
N2:49018	chr02	48945	49091	+2:YBL090W;	5.44234	6	100	8.385	49011	382	27	49032	159	25	49015	86	21	49014	52	23	49016	63	18	49014	79	24	49013	306	20	49006	68	22	49013	19	23	49010	29	16	49018	18	19	49018	76	21	49013	230	20	49013	379
N2:49204	chr02	49131	49277	+3:YBL090W;	5.72091	6	100	28.106	49197	281	25	49198	112	29	49199	50	24	49196	41	23	49201	56	26	49200	70	19	49197	171	24	49195	53	28	49185	13	18	49192	6	14	49208	8	15	49207	35	30	49195	100	20	49202	188
N2:49355	chr02	49282	49428	-1:YBL089W; +4*:YBL090W;	4.72338	5	85.67	6.458	49356	137	23	49355	39	20	49352	19	12	49356	21	22	49352	32	32	49358	39	19	49351	99	18	49351	15	24	49349	7	42				49364	4	12	49366	44	22	49349	37	19	49355	56
N2:49600	chr02	49527	49673	+1:YBL089W;	5.4776	6	100	8.383	49589	393	25	49590	159	29	49594	76	23	49587	66	31				49588	95	29	49595	616	24	49609	209	24	49595	85	24	49598	38	25				49586	261	27	49590	208	21	49601	353
N2:49766	chr02	49693	49839	+2:YBL089W;	3.33467	5	100	23.65	49758	446	27	49778	125	31	49752	73	29	49740	62	26	49723	85	33	49751	62	35	49757	278	29	49787	54	32	49745	21	21				49728	18	28				49752	209	25	49765	260
N2:49915	chr02	49842	49988	+3:YBL089W;	5.10242	6	100	14.662	49910	401	29	49950	108	35	49908	82	26	49904	68	31	49909	76	28	49903	76	28	49907	281	31				49915	32	30	49895	26	32	49910	22	20	49903	103	35	49908	200	24	49948	190
N2:50074	chr02	50001	50147	+4:YBL089W;	2.5307	3	100	12.49	50079	327	35	50122	127	37	50076	59	27	50073	50	32	50069	46	31	50070	43	38	50074	158	35	50072	47	29	50071	13	21	50074	22	25	50067	12	19	50067	53	46	50115	78	31	50115	110
N2:50224	chr02	50151	50297	+5:YBL089W;	4.22316	6	100	28.831	50265	438	27	50277	155	29	50244	62	28	50249	53	32	50239	72	38	50221	53	36	50270	119	28	50282	16	21	50236	15	26	50242	10	35	50226	14	29	50229	158	30	50275	79	26
N2:50420	chr02	50347	50493	+6:YBL089W;	4.62093	6	100	14.689	50428	611	28	50429	225	25	50423	110	24	50417	100	32	50419	90	30	50375	50	33	50427	156	28	50456	15	19	50421	12	31	50416	9	33	50421	11	22	50416	103	35	50430	80	22	50428	34
N2:50586	chr02	50513	50659	+7:YBL089W; +53*:YBL088C;	5.02922	6	100	12.329	50586	440	33	50585	120	30	50583	75	27	50590	52	32	50585	91	30	50579	43	39	50585	109	32	50605	11	37	50586	6	26	50571	12	28				50586	82	39	50582	22	27	50581	15
N2:50929	chr02	50856	51002	+9*:YBL089W; +51:YBL088C;	3.02049	5	78	24.844	50939	323	25	50934	76	33	50935	52	31	50942	49	24	50942	44	31							50938	16	23	50923	3	32				50942	2	13	50887	31	34	50941	13	22
N2:51119	chr02	51046	51192	+50:YBL088C;	3.99489	6	98.75	25.977	51134	362	42	51137	98	41	51138	71	38							51076	50	32	51076	75	38	51162	13	30	51148	6	26	51138	15	32	51134	6	34	51081	73	31				51137	7
N2:51293	chr02	51220	51366	+49:YBL088C;	2.66771	4	78	34.856										51245	59	36	51238	56	41	51275	38	38	51247	56	33				51327	3	26										51294	7	26
N2:51455	chr02	51382	51528	+48:YBL088C;	2.61284	4	100	25.012	51399	403	42	51400	145	40	51414	69	39	51467	68	38	51465	112	37	51472	69	34	51457	68	28	51395	19	37				51466	238	7	51397	23	43				51472	9	38
N2:51606	chr02	51533	51679	+47:YBL088C;	3.04654	4	86.33	15.819	51637	196	48	51566	62	42							51630	11	34	51628	17	40	51626	42	38	51545	5	43	51543	12	39				51574	10	38							51538	9
N2:51797	chr02	51724	51870	+46:YBL088C;	3.55197	5	85.33	19.267	51810	465	32	51813	138	30	51806	80	32	51806	89	30	51803	73	33	51805	69	30	51804	52	33	51763	20	28	51791	8	24	51807	16	23	51793	5	17	51774	38	35	51799	9	19	51776	6
N2:51994	chr02	51921	52067	+45:YBL088C;	3.73494	5	100	30.648	52015	777	35	52026	240	33	52042	137	42	51998	114	32							52009	100	37	51993	11	24	51970	10	33				51941	7	49				51994	13	27	52022	6
N2:52265	chr02	52192	52338	+43:YBL088C;	3.08017	6	100	27.811	52311	331	39				52306	48	40							52289	37	36				52274	9	33				52323	11	21							52261	4	24	52232	3
N2:52503	chr02	52430	52576	+42:YBL088C;	2.53834	5	99	34.543	52487	484	43				52488	85	46							52497	69	38							52503	1	0	52472	9	32	52498	17	37							52575	2
N2:52678	chr02	52605	52751	+41:YBL088C;	3.53459	4	56	10.046	52703	428	35	52682	177	32	52678	80	35	52674	83	32	52681	79	37	52689	68	38	52726	41	39	52608	9	32	52685	4	23	52670	7	20	52695	4	36	52672	9	29	52669	6	29
N2:52909	chr02	52836	52982	+40:YBL088C;	2.25752	5	85.33	48.306	52915	687	38	52942	234	40	52912	150	38	52899	141	39	52861	83	32	52902	118	36	52910	72	35							52959	14	34	52882	8	23				52895	8	30
N2:53204	chr02	53131	53277	+38:YBL088C;	4.8126	6	100	21.942	53203	633	36	53216	209	31				53206	115	40				53211	104	28				53207	17	36	53251	10	28	53199	12	20				53202	20	31	53219	7	14	53199	3
N2:53362	chr02	53289	53435	+37:YBL088C;	2.69679	5	100	36.01				53363	175	30	53362	129	34	53365	112	32	53364	129	30	53364	108	31	53368	64	33	53372	7	27				53366	13	35	53374	11	36
N2:53581	chr02	53508	53654	+36:YBL088C;	3.72656	6	100	43.398	53509	566	37	53589	133	34	53514	87	39	53582	89	33	53576	99	35	53572	100	37	53585	60	30	53591	7	30	53603	7	33	53571	15	32	53593	4	10	53526	12	37	53570	8	31
N2:53745	chr02	53672	53818	+35:YBL088C;	1.88678	5	87	40.543	53759	347	32	53747	94	45				53751	63	39	53747	53	41	53759	52	39	53755	35	31	53753	4	28													53753	3	28	53678	1
N2:53896	chr02	53823	53969	+34:YBL088C;	2.54416	4	100	28.531	53963	511	37	53964	127	41	53824	84	40	53963	92	38	53968	74	38	53968	73	32	53918	72	38	53921	8	31				53848	10	36	53855	6	25	53897	15	34	53937	6	33	53922	5
N2:54130	chr02	54057	54203	+33:YBL088C;	2.02631	3	68.5	25.736	54129	231	40	54191	64	40	54170	46	33	54183	56	39	54127	32	47	54182	30	34	54152	17	27	54076	3	0	54184	2	9	54127	4	32	54136	2	11	54060	11	26	54140	3	26
N2:54380	chr02	54307	54453	+32:YBL088C;	2.85859	4	100	27.379	54373	616	36	54369	152	33	54366	102	37	54369	94	35	54313	113	41	54367	105	32	54372	71	31	54343	8	16	54380	7	33				54310	7	46				54314	5	34	54364	5
N2:54546	chr02	54473	54619	+31:YBL088C;	3.10622	5	100	32.988																54546	45	30				54533	8	26				54554	9	37	54475	7	48	54518	23	37	54543	8	35	54536	1
N2:54732	chr02	54659	54805	+30:YBL088C;	3.54241	5	93	19.799																54702	101	38				54700	4	25				54735	3	31				54668	11	35	54746	7	19	54714	3
N2:54952	chr02	54879	55025	+29:YBL088C;	1.05718	4	93	59.039	55017	607	35	55019	133	34				55011	85	38				55016	105	32	55014	72	36	54948	9	43				54966	11	42	54924	8	37
N2:55178	chr02	55105	55251	+28:YBL088C;	2.85912	5	100	33.776				55211	107	33				55243	97	34	55220	63	34				55220	29	35	55120	1	0				55226	2	23	55246	10	25				55235	2	1	55183	4
N2:55577	chr02	55504	55650	+26:YBL088C;	2.42796	5	99	42.31	55561	613	32	55559	205	31	55594	113	41	55565	129	32	55562	107	34	55577	95	38	55559	76	34	55532	15	24	55529	3	22	55532	7	25	55525	10	29	55525	20	37	55616	3	12	55600	3
N2:55883	chr02	55810	55956	+24:YBL088C;	2.57676	6	100	37.012	55883	577	41	55884	172	40				55888	90	37				55948	70	38	55886	72	39	55950	10	32	55905	8	18	55944	14	33	55906	5	24	55892	19	34	55883	5	21	55949	2
N2:56173	chr02	56100	56246	+22:YBL088C;	2.84348	6	75.25	47.956	56196	602	40	56105	152	35	56104	105	37	56187	84	35	56178	97	41	56202	91	40	56100	57	40	56111	7	12	56218	11	25	56243	4	30				56108	23	38	56203	8	26	56104	4
N2:56487	chr02	56414	56560	+20:YBL088C;	3.07732	6	100	28.472	56492	819	35	56427	185	44	56510	118	41	56427	95	46	56423	120	44	56498	114	37	56430	80	48	56442	11	21	56510	9	29	56518	19	29				56512	34	36	56511	8	38	56414	2
N2:56772	chr02	56699	56845	+18:YBL088C;	3.74153	6	99.25	25.041	56760	690	36	56773	191	40	56763	103	39	56759	98	37	56768	102	38	56775	108	37				56726	9	29	56725	12	35							56742	15	45				56764	4
N2:56979	chr02	56906	57052	+17:YBL088C;	3.6875	6	100	21.307	56928	427	35	56942	108	39	56916	92	43	56999	74	37	56993	75	41	56931	75	40	56965	53	37	56950	12	30				57002	5	42	56946	8	19				56906	10	23	56926	5
N2:57151	chr02	57078	57224	+16:YBL088C;	2.80661	5	96.33	30.777				57174	137	33	57169	73	35	57178	101	31							57174	37	29	57145	5	32	57176	5	24	57188	7	28	57171	2	1				57120	3	13	57094	1
N2:57430	chr02	57357	57503	+14:YBL088C;	2.03697	4	64	28.052	57438	348	45				57436	55	34	57442	65	36	57434	64	34	57441	66	38	57380	22	42							57454	2	8
N2:57584	chr02	57511	57657	+13:YBL088C;	2.93052	6	84.75	45.071	57600	532	42	57521	119	32	57595	88	43	57609	90	39				57604	94	42	57592	43	36	57513	4	8	57519	4	13							57594	14	31				57511	5
N2:57942	chr02	57869	58015	+11:YBL088C;	2.28159	5	72	32.136	57890	471	28	57976	75	35	57895	66	30	57914	71	31	57897	63	23				57909	40	34	57946	4	18	57900	2	0	57897	6	17	57885	2	16	57983	5	13	57890	1	0	57878	1
N2:58143	chr02	58070	58216	+10:YBL088C;	3.21064	5	76	32.871	58076	341	33	58175	70	31	58089	63	34	58105	55	38	58184	61	38	58174	51	38	58142	41	39	58120	5	29	58176	6	31	58079	9	32	58153	2	7	58188	7	35				58180	3
N2:58357	chr02	58284	58430	+9:YBL088C;	1.97779	4	100	33.01	58362	367	33	58323	147	27	58359	66	32	58369	70	39	58355	81	33	58419	51	37	58349	31	32	58345	9	16	58359	2	0	58320	5	52	58332	4	0	58359	10	26	58363	10	29	58356	9
N2:58560	chr02	58487	58633	+8:YBL088C;	4.34639	6	89.25	30.387	58558	273	41				58554	45	44	58561	39	45	58546	36	33	58596	40	35	58536	42	41	58497	11	24	58609	3	26	58518	4	20	58615	4	12	58543	15	28	58605	8	40
N2:58849	chr02	58776	58922	+6:YBL088C;	4.69309	6	90.25	13.736	58849	531	25	58846	156	31	58849	79	29	58849	119	26	58844	79	24	58847	76	22	58847	76	27	58865	12	26				58828	3	15	58842	11	16	58851	17	27	58854	95	19	58845	62
N2:59022	chr02	58949	59095	+5:YBL088C;	4.36419	6	90.25	26.126	59019	384	29	58999	103	26	59013	84	25	59008	62	30	59009	62	25	59016	49	25	59024	96	26				58996	7	33	58978	9	16				59011	25	21	59017	75	25	59018	120
N2:59192	chr02	59119	59265	+4:YBL088C;	5.46037	6	100	8.214	59193	506	19	59190	133	25	59191	109	21	59194	63	19	59192	90	20	59191	76	22	59194	238	23	59189	48	24	59195	21	16	59198	19	19	59192	11	10	59190	108	20	59193	200	17	59195	285
N2:59373	chr02	59300	59446	-1:Unit028; +3:YBL088C;	5.46718	6	64.75	8.183	59363	277	28	59341	83	31	59370	38	27	59364	49	29	59373	39	31	59366	41	29	59362	152	25	59379	44	24				59368	21	25	59339	7	34	59373	15	22	59357	61	25	59372	117
N2:59558	chr02	59485	59631	+1:Unit028; +2:YBL088C;	5.80472	6	90.75	4.803	59518	252	28	59509	60	32	59519	36	26	59546	35	33	59551	37	39	59519	43	29	59515	131	27	59545	38	36	59533	12	27	59537	8	42	59556	9	28	59555	85	34	59511	63	29	59542	99
N2:59731	chr02	59658	59804	+2*:Unit028; +1:YBL088C;	1.71015	3	3	41.797	59737	72	38	59667	25	39							59724	15	34	59739	11	23	59722	13	43													59745	5	30	59667	11	28	59695	25
N2:59884	chr02	59811	59957	-1:YBL088C;	3.45538	6	89.25	27.494	59886	104	24	59885	134	15	59885	45	15	59886	65	14	59885	74	8	59888	49	14	59886	60	26	59895	15	33	59890	13	20	59884	11	11	59886	16	14	59902	126	23	59887	42	23	59888	87
N2:60119	chr02	60046	60192		4.64891	6	90.25	18.738	60120	162	31	60126	60	33	60048	17	43	60057	17	38	60055	13	32	60059	18	40	60120	59	27	60137	16	16	60159	18	31	60048	6	25	60057	11	12	60079	58	34	60128	69	26	60136	74
N2:60568	chr02	60495	60641		2.68105	4	100	19.95	60561	385	19	60575	146	23	60562	103	24	60560	74	27	60565	84	22	60558	113	20	60560	445	17	60560	17	31	60561	16	11	60561	12	8	60563	9	25	60556	73	17	60559	228	18	60568	197
N2:60747	chr02	60674	60820	+1*:YBL087C;	4.07947	6	89	24.582	60759	219	25	60768	98	30	60759	55	20	60760	52	20	60764	63	21	60736	37	28	60756	328	29	60763	61	21	60755	15	14	60758	8	39	60763	3	15	60721	39	28	60754	108	25	60774	189
N2:61017	chr02	60944	61090	-1:YBL087C;	1.96905	2	100	4.243				61022	3	11	60982	1	0	61023	1	0	61015	1	0	61014	2	16
N2:61222	chr02	61149	61295	+10*:YBL086C;	3.41645	4	95	11.147	61215	151	26	61207	67	29	61212	34	25	61220	37	24	61213	42	26	61203	27	22	61209	17	20	61192	3	5	61224	2	7	61200	3	16	61184	3	13	61207	7	21	61198	10	21	61195	6
N2:61396	chr02	61323	61469	+9:YBL086C;	5.00028	6	100	12.388	61376	475	29	61373	153	28	61383	101	29	61385	57	27				61378	87	29	61390	65	30	61371	4	24	61379	7	26				61349	4	30	61397	28	26				61383	11
N2:61691	chr02	61618	61764	+7:YBL086C;	3.87508	5	89.75	30.931				61633	166	36	61683	58	33				61672	73	28	61692	42	32	61668	35	29	61682	16	20	61690	9	20	61638	4	24										61683	8
N2:61839	chr02	61766	61912	+6:YBL086C;	2.57544	4	100	31.983	61840	598	28	61846	153	34	61848	96	29	61842	69	32	61841	94	28	61846	78	30	61839	83	28	61849	11	12	61841	4	12	61896	3	26	61843	4	0	61840	10	27	61840	63	26	61840	29
N2:62003	chr02	61930	62076	+5:YBL086C;	3.83728	5	100	14.983																						62060	6	47										62020	3	31	61989	32	20
N2:62156	chr02	62083	62229	+4:YBL086C;	3.64771	5	100	17.541	62140	723	28	62142	158	32	62145	129	30	62149	62	28							62144	104	27				62152	16	21				62140	6	21							62150	96
N2:62463	chr02	62390	62536	+2:YBL086C;	5.80099	6	100	4.875	62456	1011	18	62452	278	19	62455	159	21	62452	117	13	62451	206	17	62448	192	13	62454	229	15	62442	33	17	62458	42	15	62449	38	13	62443	22	11	62446	103	17	62458	553	16	62455	525
N2:62651	chr02	62578	62724	+1:YBL086C;	5.2121	6	100	10.231	62636	509	24	62621	162	28	62624	83	25	62615	70	22	62617	66	25	62615	63	21	62631	151	24	62614	35	26	62616	24	26	62617	11	16	62617	13	25	62622	43	24	62626	117	23	62638	309
N2:62915	chr02	62842	62988	-1:YBL086C;	4.56557	6	99.25	14.569	62925	357	31	62932	206	32	62932	60	20	62951	28	24	62943	66	30	62930	95	26	62930	26	22	62927	10	24	62941	24	26	62960	49	24	62942	27	28	62925	6	19	62929	17	24	62936	8
N2:63074	chr02	63001	63147		3.05652	4	57	15.319	63106	317	35	63110	96	37	63108	44	35	63113	44	29	63114	83	21	63104	84	24	63109	29	36				63114	37	35	63120	29	23	63132	24	20				63125	6	28	63121	6
N2:63223	chr02	63150	63296		4.59947	6	94.75	21.382																63252	24	22	63259	16	30	63207	9	17										63191	11	42
N2:63459	chr02	63386	63532	-1:YBL085W;	2.75307	3	100	8.718	63500	156	30	63399	37	33	63450	13	36							63516	12	28	63475	90	27	63406	60	29	63467	16	30				63453	3	12	63471	25	40	63451	8	27	63474	9
N2:63724	chr02	63651	63797	+1:YBL085W;	4.99022	6	86	21.361				63771	90	31	63770	42	22	63777	41	32	63779	58	25	63778	39	32	63761	141	25	63768	44	27	63765	18	23	63709	5	26	63762	2	21	63778	49	39
N2:63893	chr02	63820	63966	+2:YBL085W;	3.81891	5	100	25.273	63885	309	28	63954	88	38										63964	53	36				63951	30	29				63872	3	16				63954	51	40	63883	190	24	63904	180
N2:64074	chr02	64001	64147	+3:YBL085W;	3.91093	5	100	18.913	64067	419	27				64076	56	32	64084	45	42	64071	88	39				64056	73	29				64004	5	51	64048	8	27	64055	7	23				64069	155	22	64078	103
N2:64384	chr02	64311	64457	+5:YBL085W;	3.21312	6	98	37.345	64394	455	30										64328	125	42							64429	11	26	64397	5	27	64332	7	24
N2:64550	chr02	64477	64623	+6:YBL085W;	3.49111	6	90.25	34.961	64567	478	27	64609	142	32	64566	79	30	64576	75	27	64569	88	30	64603	85	31	64563	30	31	64595	2	11	64609	4	24	64590	3	12				64567	16	37	64569	32	15	64575	19
N2:64857	chr02	64784	64930	+8:YBL085W;	2.4641	5	61.33	31.948	64876	554	36	64786	119	30	64869	91	41				64789	87	35	64874	74	40	64869	22	33	64789	2	5	64858	5	0	64810	4	29	64848	5	11	64898	15	27	64875	30	33	64785	8
N2:65113	chr02	65040	65186	+10:YBL085W;	1.87429	5	89.67	47.29				65114	110	31																65141	10	27	65090	11	39	65150	7	29				65090	14	36				65094	3
N2:65297	chr02	65224	65370	+11:YBL085W;	2.10721	5	89	40.382	65228	611	39	65288	157	35	65301	100	37	65288	71	36	65290	123	37	65227	74	39	65226	26	40	65298	7	30	65283	6	26				65290	5	13	65241	9	26	65227	13	27	65293	5
N2:65540	chr02	65467	65613	+12:YBL085W;	2.83212	5	99	30.509	65500	785	38				65550	107	31							65548	84	31	65532	31	29	65573	4	30				65480	10	31				65546	23	28	65519	17	33	65548	5
N2:65734	chr02	65661	65807	+13:YBL085W;	3.87004	6	100	27.662	65724	719	34	65725	117	35	65722	98	34	65725	86	32	65720	115	36	65725	112	32	65767	39	40	65734	11	18	65763	3	19	65695	18	29	65727	8	21	65747	21	35	65721	16	23	65706	9
N2:65948	chr02	65875	66021	+14:YBL085W;	4.95578	6	100	12.404	65943	932	29	65944	281	28	65942	158	28	65941	100	32	65944	220	28	65940	127	31	65942	61	36	65943	13	24	65937	14	35				65990	2	15	65941	16	28	65941	20	22	65942	14
N2:66108	chr02	66035	66181	+15:YBL085W;	5.3487	6	98	9.109	66112	629	36	66118	162	34	66117	128	37	66114	56	32	66115	120	33	66113	101	35	66114	47	33				66085	4	47	66160	10	19	66163	3	34	66110	22	35	66109	6	29
N2:66267	chr02	66194	66340	+16:YBL085W;	4.58946	5	100	8.173							66315	78	43	66264	53	38													66256	11	34							66264	35	37	66262	11	40	66197	7
N2:66439	chr02	66366	66512	+17:YBL085W;	4.516	5	83.67	9.127	66465	333	34	66465	59	34				66469	39	39				66466	47	37	66420	30	36	66421	8	29				66432	3	20	66384	3	2				66417	6	19	66370	1
N2:66632	chr02	66559	66705	+18:YBL085W;	4.26922	6	100	17.818	66640	591	36	66625	204	30	66638	114	36	66634	85	28	66633	119	34	66628	111	37	66633	75	36	66582	7	25	66635	17	29	66633	8	24	66665	17	18	66560	25	31	66629	21	34	66635	10
N2:66803	chr02	66730	66876	+19*:YBL085W;	3.89234	5	100	19.499	66807	418	28	66806	64	29	66799	64	32	66804	52	33	66807	64	36	66800	63	30	66804	39	26	66796	4	11	66816	3	17	66783	4	25				66816	12	21	66812	11	31	66805	2
N2:67030	chr02	66957	67103		1.95739	3	64	40.853				66974	15	39	66994	17	41							67038	9	44										66972	1	0				66987	3	20				66968	1
N2:67294	chr02	67221	67367		3.54099	6	100	41.649	67315	669	34	67284	165	33	67281	134	41	67290	93	37	67270	92	41	67312	111	40	67301	83	32	67316	12	31	67310	6	20	67276	6	23	67246	5	16	67271	17	28	67321	17	34	67270	7
N2:67458	chr02	67385	67531		2.89345	5	100	33.715	67480	462	40	67442	137	35	67457	79	34	67441	96	34							67485	29	34							67448	10	10				67450	9	38	67481	13	32
N2:67632	chr02	67559	67705		2.65129	4	100	32.171	67644	586	32	67635	169	30	67631	114	34										67635	40	31	67624	6	15	67613	8	33	67624	10	34	67590	9	23	67690	17	31	67655	14	29
N2:67884	chr02	67811	67957		3.43883	6	96.5	32.216	67838	684	28	67824	150	42	67839	105	33	67922	60	45	67833	112	36	67915	71	38	67835	39	29	67919	7	42				67825	5	28				67868	10	39				67933	6
N2:68048	chr02	67975	68121		2.58862	4	80.5	35.28	68001	380	38	68078	151	36				68075	64	31	68082	63	36				68002	32	47	68098	3	13	68017	1	0	67994	1	0	68076	4	29	68042	4	23
N2:68437	chr02	68364	68510	+8:YBL084C;	2.71621	5	100	33.99	68413	404	29	68409	93	31	68409	69	27	68411	64	20	68408	72	25	68412	72	24	68407	29	29	68448	3	18				68425	1	0	68409	2	33	68442	16	36				68417	11
N2:68709	chr02	68636	68782	+6:YBL084C;	1.55997	3	56	37.207							68752	57	43																						68775	2	19
N2:68997	chr02	68924	69070	+4:YBL084C;	3.44534	5	100	18.534	68991	497	26	68984	259	22	68988	83	33				69028	109	31	69022	74	31	68989	67	31	68984	20	25	68998	9	27	68987	7	13	69011	15	18				68985	156	24	68986	88
N2:69156	chr02	69083	69229	+3:YBL084C;	5.34283	6	100	9.333	69157	680	22	69154	195	24	69158	106	26	69159	69	24				69170	90	24	69156	130	22	69161	18	11	69172	9	14	69152	18	16	69159	19	25	69156	40	21	69158	256	19	69156	242
N2:69337	chr02	69264	69410	+2:YBL084C;	4.09225	6	80.5	20.595	69331	412	21	69328	68	26	69337	80	22	69332	37	19	69340	38	29	69354	59	24	69331	69	21	69320	9	15	69352	9	20	69351	21	23	69307	24	25	69344	54	26	69333	137	17	69334	189
N2:69502	chr02	69429	69575	+1:YBL084C;	3.13921	4	98.5	14.245	69510	271	20	69505	78	26	69489	49	30	69505	37	22	69500	35	21	69512	51	24	69503	85	23	69506	26	22	69516	20	22	69503	17	15	69511	19	24	69509	30	35	69509	86	16	69505	110
N2:69775	chr02	69702	69848	-1:YBL084C; +9*:YBL082C;	4.7978	6	100	14.993										69774	56	19				69789	61	19							69778	19	15	69775	23	12	69790	11	18	69778	87	20				69786	41
N2:69936	chr02	69863	70009	+8:YBL082C;	5.21577	6	100	10.309	69930	766	22	69925	278	26	69936	122	21	69937	87	22	69931	129	24	69937	103	22	69927	124	24	69928	11	21	69946	16	22	69940	12	9	69938	25	22	69941	174	20	69926	54	22
N2:70110	chr02	70037	70183	+7:YBL082C;	4.79274	5	81	5.639	70110	425	28	70101	132	28	70109	93	31	70109	45	27	70111	80	30	70117	59	28	70107	83	31	70080	10	27	70140	7	37	70105	15	13	70111	10	26	70103	114	31	70111	31	28	70105	11
N2:70284	chr02	70211	70357	+6:YBL082C;	3.87335	6	100	20.08	70295	933	25	70295	219	25	70292	157	29	70291	83	22	70295	132	30	70291	110	26	70297	190	26	70282	11	30	70292	21	26	70291	25	19	70302	19	35	70280	94	30	70297	84	26	70287	20
N2:70642	chr02	70569	70715	+4:YBL082C;	3.15131	4	95.5	14.033	70637	389	22	70616	135	28	70630	84	25	70623	49	23	70633	85	33	70612	61	33	70625	78	33	70618	12	22	70620	9	27	70598	12	40	70615	7	29	70608	61	25	70645	69	19	70621	43
N2:70806	chr02	70733	70879	+3:YBL082C;	4.59282	5	77.33	7.861	70801	441	23	70801	122	21	70800	103	25	70798	71	24	70799	104	30	70793	78	28	70796	147	26	70795	10	24	70796	19	15	70773	22	24	70784	10	13	70789	82	26	70799	169	21	70798	137
N2:71002	chr02	70929	71075	+2:YBL082C;	3.03193	4	74.5	20.769	70953	333	32	70950	116	30	70950	59	31	70953	60	27	70947	75	30	70949	53	29	70952	99	31	70962	5	23	70950	10	15	70935	10	33	70940	4	5	70944	27	33	70954	133	32	70953	184
N2:71150	chr02	71077	71223	+1:YBL082C;	4.4676	6	80	16	71120	379	29	71133	115	29	71115	84	31	71117	49	32	71125	82	34	71122	62	31	71121	200	26	71115	34	18	71116	32	18	71098	10	20	71098	11	30	71116	76	22	71137	136	24	71140	211
N2:71362	chr02	71289	71435	-1:YBL081W; -1:YBL082C;	4.34817	6	75	19.732	71358	248	23	71351	136	25	71349	73	24	71353	59	19	71351	55	25	71360	76	18	71357	294	18	71364	9	26	71353	18	15	71366	9	20	71346	10	7	71359	45	22	71355	48	20	71349	105
N2:71602	chr02	71529	71675	+1:YBL081W;	4.70055	6	78.5	15.319				71607	50	29	71612	26	23	71607	14	19	71613	23	18	71610	21	15	71617	80	25	71606	12	32	71608	4	31				71622	11	8	71606	10	23	71612	42	18	71608	45
N2:71756	chr02	71683	71829	+2:YBL081W;	1.96905	2	36.5	4.243	71754	100	29	71755	47	28	71761	28	23	71757	27	28													71758	1	0	71765	1	0				71757	5	16
N2:71949	chr02	71876	72022	+3:YBL081W;	5.57586	6	100	7.294	71944	634	21	71945	284	17	71945	144	20	71943	159	13	71947	176	22	71944	138	18	71948	117	22	71947	17	25	71952	11	12	71948	26	15	71943	38	15	71940	76	17	71944	438	17	71949	388
N2:72109	chr02	72036	72182	+4:YBL081W;	5.76977	6	100	5.241	72109	288	24				72111	44	18	72115	34	19	72122	37	20	72119	52	23	72106	44	21	72110	7	24	72109	12	9				72113	10	22	72109	50	19	72104	102	23	72107	106
N2:72271	chr02	72198	72344	+5*:YBL081W;	2.67298	3	100	10.149	72272	695	27	72270	183	26	72270	130	26	72270	92	20	72271	103	26	72267	95	19	72282	67	29				72274	10	18	72274	30	23	72263	10	18	72272	78	22	72270	231	24	72273	145
N2:72428	chr02	72355	72501		3.51058	6	79.5	20.443				72432	63	35	72422	73	29	72429	26	23	72420	31	34	72427	29	33				72396	1	0	72428	3	16	72429	12	28	72447	4	18	72424	106	18	72422	46	25	72424	7
N2:72594	chr02	72521	72667		3.60252	4	100	9.215	72598	442	29	72608	102	31	72611	99	32	72608	45	27	72608	65	26	72597	77	24	72608	45	29	72574	5	27	72578	5	23	72611	14	16	72604	11	18	72596	99	24	72598	99	22	72604	14
N2:72762	chr02	72689	72835		3.22841	4	100	13.72				72770	167	29							72764	115	30	72755	123	27	72766	49	32	72770	16	25	72750	24	25				72760	21	37	72764	125	24	72761	65	34	72763	17
N2:72918	chr02	72845	72991		3.9508	5	100	13.315	72905	541	28				72909	93	27	72909	64	19				72910	85	17	72965	31	26				72916	5	13	72906	19	32	72909	10	44
N2:73089	chr02	73016	73162	+11*:YBL080C;	3.21482	5	67.33	30.728				73091	112	31	73096	58	36	73089	58	26	73087	79	24	73084	42	19										73088	2	37	73079	3	24
N2:73243	chr02	73170	73316	+10:YBL080C;	4.64967	5	100	7.503	73208	514	38	73295	130	34	73255	78	37	73262	71	35	73284	95	35	73283	78	38	73203	56	34	73183	6	26				73249	12	35	73273	8	41	73209	13	30	73189	17	28	73258	9
N2:73399	chr02	73326	73472	+9:YBL080C;	3.23278	4	100	13.204	73379	365	35																73382	31	34	73381	3	28	73372	8	39							73393	7	33	73384	28	26
N2:73554	chr02	73481	73627	+8:YBL080C;	5.53968	6	100	7.501	73549	681	30	73551	166	37	73555	119	32	73554	86	30	73555	114	32	73549	92	27	73552	102	31	73539	9	25	73553	9	8	73551	9	27	73554	6	18	73548	20	30	73551	27	18
N2:73728	chr02	73655	73801	+7:YBL080C;	2.4351	4	83	24.157	73699	386	28				73716	105	31	73704	51	29	73718	56	27	73709	46	25	73707	49	30										73720	8	14				73698	27	29	73695	13
N2:73877	chr02	73804	73950	+6:YBL080C;	4.38644	6	100	18.836	73867	1009	21	73863	163	26	73870	160	21	73879	92	24	73876	119	22	73866	147	24	73869	184	22	73856	20	31	73878	30	27	73838	16	25				73866	56	25	73864	94	19	73867	64
N2:74024	chr02	73951	74097	+5:YBL080C;	3.53819	5	100	30.689				74017	115	28	74029	84	30							74031	53	29							74038	14	22	74054	18	27	74002	18	32	74021	31	26	74013	64	24
N2:74199	chr02	74126	74272	+4:YBL080C;	4.48559	6	100	27.096	74199	455	23	74192	122	23	74196	72	29	74194	43	29	74198	61	34	74197	60	24	74197	99	29	74196	18	26							74191	10	25	74195	64	18	74194	96	19	74192	130
N2:74366	chr02	74293	74439	+3:YBL080C;	4.43652	6	83.5	25.137	74356	893	19	74355	350	20	74360	138	24	74358	96	26	74359	113	24	74358	128	21	74357	352	20	74355	50	14	74360	66	17	74359	48	19	74358	37	16	74358	101	23	74356	407	16	74355	505
N2:74534	chr02	74461	74607	+2:YBL080C;	4.21732	6	100	21.86	74524	618	19	74521	205	22	74525	129	22	74527	73	21	74523	61	39	74522	103	23	74523	299	19	74522	13	7	74525	31	11	74527	23	26	74524	27	34	74525	114	23	74523	446	13	74524	596
N2:74708	chr02	74635	74781	+1:YBL080C;	4.64239	6	100	15.342	74691	614	19	74690	212	21	74693	103	25	74694	53	26	74680	86	36	74702	103	23	74691	297	20	74690	85	18	74691	45	18	74684	36	25	74691	22	29	74702	206	20	74689	291	17	74702	497
N2:74968	chr02	74895	75041	-1:YBL079W; -1:YBL080C;	5.84183	6	94.75	4.355	74979	199	17	74979	97	17	74977	30	20	74977	31	15	74976	9	18	74980	44	15	74978	260	17	74978	12	14	74975	30	14	74981	10	8	74965	22	17	74976	38	19	74994	6	28	74979	61
N2:75238	chr02	75165	75311	+1:YBL079W;	5.95184	6	98	2.338	75239	512	14	75237	134	18	75238	124	15	75239	98	14	75240	96	18	75238	103	13	75238	376	9	75241	31	18	75240	35	20	75239	31	10	75237	20	6	75238	63	15	75240	337	9	75238	495
N2:75413	chr02	75340	75486	+2:YBL079W;	5.73847	6	91	5.657	75414	429	19	75419	94	21	75414	97	26	75410	71	21	75408	90	21	75411	62	21	75416	109	15	75418	32	14	75419	16	12	75411	11	15	75414	13	13	75415	53	21	75416	311	16	75419	469
N2:75573	chr02	75500	75646	+3:YBL079W;	5.07245	6	86.5	11.183	75562	266	28	75588	89	25	75564	53	36	75573	25	33	75577	48	30	75560	48	35	75566	48	31	75570	34	34							75606	1	0	75574	26	26	75569	158	25	75579	151
N2:75733	chr02	75660	75806	+4:YBL079W;	3.85431	4	100	5.323	75737	501	27	75757	169	30				75727	50	28	75733	77	28	75726	71	26	75744	46	32	75728	31	23	75729	9	14	75684	10	32	75766	6	20	75728	18	36	75737	72	30	75740	81
N2:75890	chr02	75817	75963	+5:YBL079W;	3.8338	6	55.5	26.121	75905	538	31	75921	176	32	75879	112	40	75883	73	32	75909	105	33										75915	8	22	75913	9	29							75916	71	30	75913	80
N2:76048	chr02	75975	76121	+6:YBL079W;	4.19071	6	82	19.135	76063	552	34	76072	196	31	76059	135	36	76062	85	31	76062	124	34	76071	91	30	76064	82	37				76080	12	25	76060	6	20				76055	32	34				76071	35
N2:76202	chr02	76129	76275	+7:YBL079W;	4.02434	5	78.33	13.398	76215	617	38	76271	221	32	76210	113	41	76211	79	42																76214	11	28	76148	7	35	76205	19	36	76153	87	42	76261	17
N2:76449	chr02	76376	76522	+8:YBL079W;	2.0872	5	33.67	30.328				76443	138	35																			76472	3	4				76384	6	20	76488	20	38				76439	7
N2:76638	chr02	76565	76711	+9:YBL079W;	3.82521	6	84.75	19.364	76653	526	35	76637	136	32	76657	91	37	76656	89	32	76652	95	35	76653	113	34	76644	27	34	76650	10	44	76651	5	23							76674	13	36				76598	5
N2:76819	chr02	76746	76892	+10:YBL079W;	2.0556	3	78.5	23.692	76827	419	34				76825	81	35	76822	63	36	76825	67	35	76823	74	36	76817	38	39	76803	7	26							76873	3	0				76824	4	11	76751	7
N2:77080	chr02	77007	77153	+12:YBL079W;	3.18106	6	79.75	23.552	77072	566	38	77077	150	29	77070	107	35	77117	90	39	77072	118	36	77109	94	35	77092	30	31				77085	3	18	77079	11	20	77115	4	32	77077	20	34	77074	19	33	77074	6
N2:77259	chr02	77186	77332	+13:YBL079W;	4.58314	5	76	7.969	77286	476	32	77284	116	33							77285	93	40				77282	11	31	77284	4	1	77249	4	16										77285	7	38	77283	4
N2:77422	chr02	77349	77495	+14:YBL079W;	3.01168	4	100	16.773	77490	597	38				77408	89	38	77417	73	33				77416	61	38	77432	18	40				77419	4	20				77459	4	32	77354	16	26	77467	12	35
N2:77634	chr02	77561	77707	+15:YBL079W;	2.77861	5	89	35.626	77639	368	37				77628	70	36							77566	99	41	77646	15	29	77572	11	42	77618	1	0							77567	11	29	77624	5	33	77646	2
N2:77879	chr02	77806	77952	+16:YBL079W;	3.40741	5	96.33	21.719	77940	557	34				77940	104	40	77908	111	39				77902	78	38	77912	26	36	77835	10	16	77858	1	0				77814	5	35	77905	12	23	77931	8	37	77906	4
N2:78046	chr02	77973	78119	+17:YBL079W;	2.82283	4	70.5	18.518										78057	68	28				78054	52	26	78060	12	34	78095	3	7	78047	8	26	77976	4	22				78081	2	5				78054	1
N2:78207	chr02	78134	78280	+18:YBL079W;	4.5824	6	100	14.733	78238	583	29	78237	151	33	78237	110	29	78236	83	31	78236	113	29	78237	104	29	78236	30	25	78276	6	38				78234	3	13	78267	3	26	78232	6	23	78245	9	33
N2:78354	chr02	78281	78427	+19:YBL079W;	3.08665	4	61.5	15.427	78413	487	33													78389	74	40							78282	4	31													78363	3
N2:78657	chr02	78584	78730	+21:YBL079W;	2.31274	5	49	47.689	78702	300	42	78702	89	40							78689	38	36	78697	32	33	78709	21	36	78642	3	0	78716	2	7	78690	4	5				78644	4	31
N2:78997	chr02	78924	79070	+23:YBL079W;	3.10853	5	100	24.366	78986	613	36	79028	139	40	78944	97	36				78957	78	29	78966	88	35	79008	39	36	78996	11	36	78992	3	29	79036	4	29	78965	5	19	78990	18	41
N2:79294	chr02	79221	79367	+25:YBL079W;	4.00071	6	90.25	18.247				79264	113	31	79263	51	38	79312	33	33	79268	61	42	79320	60	34	79257	26	37				79239	3	34							79332	8	36				79320	1
N2:79471	chr02	79398	79544	+26:YBL079W;	3.37974	4	56	11.701	79491	347	27	79490	92	33	79485	69	28	79496	51	15	79486	39	36	79485	47	22	79500	35	26	79398	1	0				79407	13	35				79480	14	31	79496	5	12	79481	3
N2:79658	chr02	79585	79731	+27:YBL079W;	3.9841	6	89	19.704	79662	312	36	79680	109	42	79653	74	29	79660	48	31	79653	53	30	79651	26	25				79666	8	28	79642	5	28	79618	6	8				79680	13	29	79726	2	1
N2:79836	chr02	79763	79909	+28*:YBL079W;	2.55525	3	53	12.055													79822	9	36										79822	5	5				79899	1	0							79817	4
N2:80002	chr02	79929	80075	+5*:YBL078C;	3.48859	4	72.5	10.468	79931	185	37	79986	68	37	79944	46	26	79971	39	30	79978	23	29	79934	50	29	79930	28	34	79931	4	21	79970	4	11	79933	5	21				79931	7	28	80012	5	16	80036	5
N2:80194	chr02	80121	80267	+4:YBL078C;	3.24075	5	67	19.468	80172	183	35	80187	58	34	80152	29	30	80144	27	28	80146	24	32	80238	14	31	80139	17	42				80200	1	0	80241	2	13	80144	5	8				80191	5	19	80239	11
N2:80393	chr02	80320	80466	+3:YBL078C;	4.88024	6	90.25	12.406	80397	392	26	80402	86	40	80409	67	34	80410	37	35	80409	60	34	80402	48	39	80398	60	34	80322	13	27	80405	10	31	80402	6	18	80402	14	22				80395	71	23	80394	142
N2:80562	chr02	80489	80635	+2:YBL078C;	5.83122	6	82	4.457	80562	383	28	80558	91	32	80564	46	32										80561	53	27	80517	42	27							80567	8	41	80521	20	34	80560	116	20	80559	175
N2:80709	chr02	80636	80782	+1:YBL078C;	4.69199	6	83.5	13.441	80720	498	19	80714	92	21	80718	47	26	80719	39	25	80702	46	24	80677	55	26	80720	91	19	80683	95	25	80705	14	27	80709	32	23	80720	24	24	80700	36	28	80722	74	17	80723	249
N2:80983	chr02	80910	81056	-1:YBL078C;	2.93459	5	72	25.524	81011	181	31	80989	63	29	81012	33	26	81009	20	19	81020	27	33	81025	28	20	80949	15	32	80991	4	17				81027	6	19	81003	3	1				80982	5	21	81004	8
N2:81204	chr02	81131	81277	+19*:YBL076C;	2.94703	6	77	29.607	81180	307	42	81162	87	31	81181	88	27	81175	67	25	81177	70	29	81181	76	31	81176	41	39	81167	3	10	81183	5	15	81180	12	27	81198	4	13	81174	27	31	81183	2	28	81180	11
N2:81354	chr02	81281	81427	+18:YBL076C;	4.62864	5	100	7.649	81399	272	36	81336	144	32	81349	88	32	81347	69	23	81345	78	26	81346	98	23	81345	26	37	81325	1	0	81347	5	4	81353	9	24	81348	10	19	81346	17	30	81344	7	26	81343	4
N2:81506	chr02	81433	81579	+17:YBL076C;	3.02717	5	93.67	24.489	81554	562	33	81497	139	32	81517	103	31	81503	74	27	81505	110	27	81503	82	26				81502	9	32	81502	16	33	81501	12	21	81520	4	26	81503	26	24	81509	8	30	81499	6
N2:81676	chr02	81603	81749	+16:YBL076C;	2.96596	4	100	23.415				81663	173	35	81665	106	29	81665	68	20	81661	105	26	81666	102	27				81662	11	27	81666	7	32	81666	5	19	81678	9	15				81666	10	30
N2:81830	chr02	81757	81903	+15:YBL076C;	3.97566	5	100	13.795	81819	361	41	81813	154	21	81818	75	27	81821	63	30	81819	104	28	81815	111	22	81807	25	18	81830	6	35	81822	8	25	81814	11	29	81825	6	26	81815	18	23	81891	6	27	81816	6
N2:81986	chr02	81913	82059	+14:YBL076C;	3.16137	4	89	13.601	81980	259	40	81980	132	32	81990	76	28	81984	66	30	81983	86	29	81976	64	33	81981	21	23							82000	4	16	81979	4	16	81972	25	24
N2:82140	chr02	82067	82213	+13:YBL076C;	4.28933	5	77	11.171	82187	333	35	82131	109	31	82139	83	31	82137	54	34	82136	48	36	82131	71	26	82131	18	41	82127	7	22	82132	5	44							82132	17	26	82190	5	33	82118	6
N2:82305	chr02	82232	82378	+12:YBL076C;	3.49525	6	80.75	23.833				82306	90	26	82299	56	28	82300	44	23	82298	87	32	82299	63	28				82305	9	16	82304	7	21	82293	14	21	82316	8	18	82293	41	21				82302	14
N2:82549	chr02	82476	82622	+11:YBL076C;	4.12624	6	90.75	33.259	82514	328	39	82539	109	33	82556	79	33	82570	52	33	82557	85	31	82557	52	30	82554	22	30	82558	40	26	82549	10	19	82532	6	52	82560	3	10	82555	103	22				82515	9
N2:82720	chr02	82647	82793	+10:YBL076C;	3.82903	6	72.25	28.062	82785	272	34	82719	117	31	82723	70	37	82723	55	28	82724	86	33	82727	79	33	82716	22	38				82726	16	13	82723	8	20	82710	6	31	82724	36	36	82789	42	31	82715	13
N2:82869	chr02	82796	82942	+9:YBL076C;	1.98274	3	12	27.074							82903	83	37				82897	86	35							82883	17	30	82922	10	38	82896	13	25	82898	1	0	82880	24	35				82890	16
N2:83030	chr02	82957	83103	+8:YBL076C;	3.79249	5	91	33.342	82959	483	32	83037	159	20	83071	67	38	83029	58	39				83022	75	38	82983	37	30	83053	4	21							83056	3	21	83031	24	24				83048	12
N2:83193	chr02	83120	83266	+7:YBL076C;	2.96333	5	98.33	27.554	83124	228	37	83210	210	25							83242	124	36	83217	67	35				83233	12	25	83215	2	6	83209	11	24	83228	6	13	83210	29	34	83126	34	33	83245	33
N2:83370	chr02	83297	83443	+6:YBL076C;	2.31149	4	43	27.22				83404	125	34							83409	57	27	83412	23	30				83398	6	27	83412	7	18	83413	3	13							83303	92	37	83404	26
N2:83616	chr02	83543	83689	+5:YBL076C;	4.85899	5	89	4.583				83562	86	30	83597	85	27	83603	44	32	83594	77	27	83604	56	32				83577	10	19	83574	8	26							83573	22	30	83606	111	25
N2:83905	chr02	83832	83978	+3:YBL076C;	3.50939	4	39	10.52	83903	289	27	83903	120	29	83910	74	23	83909	66	18	83911	56	23	83916	62	26	83913	113	26	83900	7	12	83904	5	27	83901	7	16	83908	7	21	83909	25	32	83900	111	21	83906	175
N2:84074	chr02	84001	84147	+2:YBL076C;	5.77085	6	100	5.269	84067	281	26	84065	131	20	84076	86	27	84077	48	18	84071	84	23	84075	76	21	84068	343	24	84068	64	24	84067	13	15	84066	7	16	84063	9	8	84071	57	18	84066	255	19	84075	302
N2:84246	chr02	84173	84319	+1:YBL076C;	5.8008	6	100	4.916	84241	468	18	84248	209	19	84247	116	17	84251	120	11	84245	140	17	84245	106	16	84238	770	17	84241	129	14	84242	21	13	84246	18	14	84244	19	17	84246	42	18	84240	178	18	84249	406
N2:84401	chr02	84328	84474	+13*:YBL075C; -1:YBL076C;	1.87905	2	100	8.485				84399	8	21																84415	7	41
N2:84566	chr02	84493	84639	+12:YBL075C;	4.9281	5	100	3.209	84569	455	16	84571	304	12	84565	112	16	84562	78	18	84570	189	15	84573	92	22	84567	348	15	84570	5	5	84561	24	12	84568	19	13	84569	18	10	84564	41	25	84567	40	16	84557	41
N2:84737	chr02	84664	84810	+11:YBL075C;	5.71562	6	100	5.992	84734	684	18	84730	174	20	84735	151	19	84734	86	17	84729	110	18	84741	85	17	84736	224	18	84732	8	16	84743	8	5	84742	7	6				84726	25	22	84731	11	31	84730	18
N2:84905	chr02	84832	84978	+10:YBL075C;	5.17604	6	100	10.87	84904	840	27	84882	196	26	84906	151	27	84902	128	23	84890	124	26				84900	179	26	84889	9	17	84893	15	28				84880	9	16	84877	16	35	84908	21	22
N2:85077	chr02	85004	85150	+9:YBL075C;	4.51496	5	100	8.849													85038	106	35													85039	5	34	85093	2	1							85024	8
N2:85353	chr02	85280	85426	+7:YBL075C;	2.39511	5	100	43.723	85325	561	36	85359	183	36	85324	112	40				85374	109	39	85370	66	36	85326	90	45	85362	5	47	85361	6	29	85358	5	16	85378	8	8	85300	6	44				85324	5
N2:85597	chr02	85524	85670	+6:YBL075C;	3.11082	4	85.5	14.944				85611	61	36							85611	43	40							85537	3	32	85542	5	39	85564	6	11	85601	2	12	85616	4	26				85623	1
N2:85823	chr02	85750	85896	+5:YBL075C;	2.68078	6	91.75	38.943	85768	583	29	85862	140	37	85767	107	29				85765	96	34	85769	50	32	85760	52	38	85776	3	29	85758	5	24	85847	13	42	85854	8	37	85829	9	45	85769	14	30	85796	5
N2:85983	chr02	85910	86056	+4:YBL075C;	2.21535	3	100	18.009	85932	528	31	86043	163	33	85936	99	32	86043	79	33	85921	93	36	86026	89	38	85937	36	34	86023	11	29	85917	4	53	86025	1	0				85983	9	10	85923	7	22	85944	8
N2:86266	chr02	86193	86339	+2:YBL075C;	3.7525	6	94.75	29.663	86255	640	34	86206	284	29	86247	93	36	86232	76	34	86202	141	31	86208	96	38	86245	48	36	86210	13	22	86197	5	30	86216	8	29				86225	14	40	86231	10	34	86201	19
N2:86431	chr02	86358	86504	+1:YBL075C; +9*:YBL074C;	4.46503	6	94.75	16.621	86427	688	24	86402	168	30	86420	124	30	86393	82	28	86410	91	28	86426	67	30	86422	53	25	86379	13	29				86442	8	23	86423	15	23	86418	61	36	86421	18	15	86392	25
N2:86602	chr02	86529	86675	0:YBL075C; +8:YBL074C;	5.31782	6	100	9.283	86600	369	30	86602	77	33	86595	73	33	86601	37	29	86598	64	33	86612	12	33	86611	32	33	86535	8	27	86616	10	20	86620	1	0	86614	2	35	86616	5	27	86602	7	26	86544	13
N2:86786	chr02	86713	86859	-1:YBL075C; +7:YBL074C;	4.85408	6	100	13.52	86783	348	27	86773	119	32	86781	69	36	86788	25	38	86780	74	32	86833	73	26	86826	36	33	86824	14	25	86776	9	30	86776	5	20	86838	12	31	86826	89	31	86780	22	23	86780	13
N2:86947	chr02	86874	87020	+6:YBL074C;	2.24267	4	100	35.94	86948	399	28	86933	122	31	86976	74	31	86975	54	26	86961	57	29	86992	44	36							87016	4	30	86996	6	13	87018	5	29	86982	47	37	86963	17	22	86976	14
N2:87114	chr02	87041	87187	+5:YBL074C;	3.84982	5	76.33	15.611	87127	345	27	87118	93	36	87134	50	31	87131	56	25	87122	67	27				87130	28	35	87131	4	17													87126	24	28	87129	20
N2:87288	chr02	87215	87361	+4:YBL074C;	5.01008	6	98.5	14.372	87286	402	30	87285	114	26	87295	58	30	87293	48	27	87289	62	28	87292	51	40	87281	45	28	87314	6	16	87273	4	17	87288	9	21	87219	4	32	87274	10	36	87278	25	25	87293	34
N2:87439	chr02	87366	87512	+3:YBL074C;	5.5666	6	91.75	7.285	87437	371	29	87442	116	30	87446	65	32	87445	49	33	87445	72	27	87454	48	31	87438	73	29				87453	2	13	87436	6	15	87436	8	5	87454	25	25	87439	67	25	87442	91
N2:87598	chr02	87525	87671	+2:YBL074C;	5.22406	6	99.25	10.621	87603	429	26	87601	180	27	87608	91	27	87609	64	29	87611	103	27	87607	80	25	87599	122	30	87608	24	16	87622	4	31				87600	2	35	87621	50	23	87599	179	26	87608	178
N2:87779	chr02	87706	87852	+1:YBL074C;	4.69676	6	93.5	15.201	87776	314	24	87777	136	24	87777	62	24	87777	59	21	87776	76	23	87782	83	25	87775	184	26	87770	27	28	87782	17	17	87767	6	23	87776	7	11	87779	98	24	87780	146	23	87783	239
N2:88068	chr02	87995	88141	-1:YBL074C;	2.47913	6	75	38.915	88003	84	27	88010	133	32	88011	47	26	88009	55	20	88009	70	29	88001	43	29	88007	232	22	88009	137	17	88004	45	22	88010	23	22	88014	11	12	88015	60	26	88006	49	27	88007	299
N2:88361	chr02	88288	88434		2.00935	4	54	31.542	88340	97	37	88327	155	31	88307	31	33	88330	45	32	88330	69	35	88328	51	32	88335	87	38	88327	64	26	88337	6	26													88324	64
N2:88514	chr02	88441	88587		2.67836	4	17	35.79	88516	22	39	88578	7	12	88521	7	39				88573	4	9	88519	8	44	88550	7	28	88575	1	0	88505	3	19				88455	1	0				88479	5	25	88575	1
N2:88776	chr02	88703	88849		1.07814	3	100	43.509
N2:89080	chr02	89007	89153	+3*:YBL072C;	4.21091	6	100	18.533	89109	133	27	89074	115	27	89112	41	24	89112	34	24	89120	68	26	89078	44	21	89118	76	26	89087	15	23	89121	7	19	89121	4	5	89123	4	27	89076	23	32	89074	70	25	89113	124
N2:89267	chr02	89194	89340	+2:YBL072C; +3*:YBL071C-B;	4.88459	6	78	12.75	89269	169	26	89282	132	24				89290	63	35	89294	80	24	89257	41	25													89307	8	32	89251	28	26	89264	105	20	89281	272
N2:89423	chr02	89350	89496	+1:YBL072C; +2:YBL071C-B;	3.77612	4	78	6.782	89421	169	25	89433	161	28	89426	54	30	89474	66	38	89490	78	37	89420	29	22	89420	494	23	89429	131	15	89422	23	16	89432	15	32				89426	62	25	89423	76	19	89478	235
N2:89643	chr02	89570	89716	-1:YBL071W-A; -1:YBL072C; +1:YBL071C-B;	2.89762	4	78	20.535	89617	6	13	89641	5	28	89615	2	1	89657	5	27				89616	2	0	89660	13	23													89598	4	10	89647	1	0
N2:89998	chr02	89925	90071	+1:YBL071W-A;	4.28448	6	97.25	23.106	89993	285	21	89990	148	23	89998	67	24	89984	36	19	89995	72	17	89997	43	24	89995	165	22	89988	56	18	89996	16	20	90001	7	22	89998	4	7	89998	56	22	89994	115	16	89980	249
N2:90160	chr02	90087	90233	+2:YBL071W-A;	4.61205	5	100	7.759	90161	449	27	90158	159	28	90167	95	27	90167	53	20	90169	89	27	90170	87	26	90165	285	24	90175	17	24	90167	22	20	90168	10	12	90158	14	12	90157	77	20	90164	285	22	90151	354
N2:90439	chr02	90366	90512	-1:YBL069W; +4*:YBL071W-A;	3.83365	6	66.25	30.224				90494	65	27	90445	41	31	90443	28	24	90499	32	30				90443	118	36	90500	7	28	90428	7	14				90471	1	0	90439	28	29	90445	26	24
N2:90709	chr02	90636	90782	+1:YBL069W;	4.39722	6	97.25	16.08	90721	342	21	90719	129	27	90718	77	25				90716	83	30				90719	148	22				90733	11	25				90725	2	26
N2:90861	chr02	90788	90934	+2:YBL069W;	3.69884	5	67	16.947										90864	63	20				90853	84	19				90861	7	14	90896	10	27	90855	12	26	90878	1	0	90846	20	27	90857	148	20	90855	206
N2:91055	chr02	90982	91128	+3:YBL069W;	5.39602	6	90.25	8.869	91049	495	21	91053	124	24	91037	100	23	91050	64	23	91028	66	26	91036	71	25	91040	156	21	91062	5	25	91046	17	18	91039	21	25	91039	18	22	91028	29	18	91042	197	19	91033	171
N2:91217	chr02	91144	91290	+4:YBL069W;	4.63336	5	96.33	7.463	91218	346	25	91213	104	27	91206	80	26	91215	46	30	91217	69	26	91214	66	25	91223	61	28	91217	7	22	91193	16	27							91191	20	32	91218	75	28	91214	59
N2:91505	chr02	91432	91578	+6:YBL069W;	4.74979	6	74.5	20.89	91505	402	28	91509	152	28	91497	75	24	91512	62	17	91515	77	23	91510	67	20	91499	76	28				91488	10	26	91500	16	21	91509	5	19	91513	7	24	91517	41	24	91496	22
N2:91668	chr02	91595	91741	+7:YBL069W;	3.45149	5	100	34.951	91687	299	27	91679	101	28	91684	72	27	91683	57	28	91683	61	24	91682	70	22				91672	6	20	91683	8	13	91668	2	6	91683	13	12	91672	21	25	91687	49	23
N2:91833	chr02	91760	91906	+8:YBL069W;	5.58755	6	89	7.146													91876	89	33	91841	80	22	91824	117	32	91832	15	29	91887	9	39	91893	16	42				91831	12	25				91827	67
N2:91981	chr02	91908	92054	+9:YBL069W;	2.91521	4	100	16.132	91978	402	26	91981	79	26	91972	63	29	91984	53	24							91975	119	20										91972	6	27	91982	14	18	91976	92	25	91977	121
N2:92156	chr02	92083	92229	+10*:YBL069W; -1:YBL068W;	5.78734	6	100	5.02	92162	172	26	92162	89	30	92159	43	27	92165	41	22	92167	49	28	92165	45	23	92163	121	26	92151	25	16	92170	7	19	92155	5	12				92152	15	25	92158	64	16	92161	102
N2:92417	chr02	92344	92490	+1:YBL068W;	4.63137	5	100	7.603	92422	249	19	92424	166	25	92420	100	24	92423	53	20	92422	100	27	92418	76	17	92422	341	15	92433	47	27	92420	9	7	92425	14	14	92420	17	28	92420	52	15	92422	196	15	92420	215
N2:92579	chr02	92506	92652	+2:YBL068W;	5.65754	6	100	6.47	92581	359	25	92584	183	25	92577	63	28				92574	87	27	92585	49	27	92582	93	28	92617	14	31				92599	5	26	92578	4	24	92585	13	28	92574	108	20	92578	153
N2:92746	chr02	92673	92819	+3:YBL068W;	5.79678	6	99.75	4.889	92758	426	27	92782	164	29	92754	90	23	92747	62	24	92755	92	26	92757	103	21	92756	151	27				92764	12	19	92760	6	14	92751	14	22	92755	53	28	92755	215	21	92753	167
N2:92933	chr02	92860	93006	+4:YBL068W;	3.30406	5	100	34.871	92939	323	42	92933	96	33	92915	55	32	92927	51	35	92921	45	34	92931	37	31	92937	88	35	92924	5	18	92943	12	29				92911	3	12	92925	16	29	92931	52	34	92926	46
N2:93193	chr02	93120	93266	+6:YBL068W;	4.58887	6	95.75	14.077	93204	497	30				93214	84	30				93219	97	31	93231	90	25	93207	79	29	93210	12	33	93224	7	27	93225	14	23	93231	9	33				93213	24	18	93224	20
N2:93367	chr02	93294	93440	+7:YBL068W;	4.41342	6	80.75	18.705	93368	413	25	93370	187	23	93369	100	24	93368	85	26	93375	114	28	93385	66	28	93366	122	23	93384	11	32	93374	10	22				93421	6	25	93372	38	26	93373	40	22	93377	8
N2:93637	chr02	93564	93710	+17*:YBL067C;	3.42616	5	36	17.213	93634	104	28	93644	30	38	93646	28	24	93641	28	26	93653	22	29				93630	13	20							93580	1	0	93636	2	8
N2:93809	chr02	93736	93882	+16:YBL067C;	4.82987	6	94.75	26.351	93805	388	31	93806	71	38	93806	84	26	93805	55	26							93804	43	28	93800	3	12	93806	3	11	93740	3	28				93766	12	27	93782	6	27	93801	5
N2:93986	chr02	93913	94059	+15:YBL067C;	3.70326	4	100	7.89	93978	615	34	94021	125	37	93976	124	34	93990	74	34	93933	94	31	93919	82	27	93986	80	37				94040	6	43				93927	3	12	93971	18	39	94003	11	40	94001	5
N2:94235	chr02	94162	94308	+13:YBL067C;	3.42361	6	89	37.185	94303	335	37				94301	80	37				94256	42	40	94224	35	36				94300	11	44	94226	3	25	94256	5	37	94191	3	35	94238	7	37	94230	3	34
N2:94493	chr02	94420	94566	+11:YBL067C;	2.61138	5	100	25.599							94476	83	42				94424	80	35				94425	45	39							94444	3	0	94427	125	3				94422	13	29	94452	2
N2:94669	chr02	94596	94742	+10:YBL067C;	2.4973	3	100	13.077										94632	43	30				94652	57	38				94730	7	15				94607	4	22				94716	12	33	94610	7	23
N2:94824	chr02	94751	94897	+9:YBL067C;	1.97824	4	85.33	39.908	94765	481	36				94765	100	41				94756	90	30	94829	50	36							94759	5	26	94772	6	42	94754	6	40							94841	6
N2:94979	chr02	94906	95052	+8:YBL067C;	4.32198	5	92.67	10.407	94956	411	27	95040	96	32	94962	98	34	94956	59	30	94940	59	33	95018	86	37	95039	49	37	94986	9	32	95012	8	28	94952	7	26	94967	9	48	95018	17	30	94942	6	27
N2:95279	chr02	95206	95352	+6:YBL067C;	5.58683	6	100	7.12	95271	309	33	95233	143	33	95274	51	36				95236	55	29	95233	83	41	95275	40	36	95245	9	33	95249	9	36	95246	6	32	95233	7	24	95282	8	30	95261	17	20	95260	20
N2:95444	chr02	95371	95517	+5:YBL067C;	4.7982	5	87	5.541				95392	87	37	95440	50	40	95414	39	32	95413	52	30																			95439	12	29	95442	20	30
N2:95601	chr02	95528	95674	+4:YBL067C;	5.77754	6	83.5	5.193	95595	570	20	95586	127	32	95600	105	23	95599	70	23	95594	104	15	95602	77	27	95594	82	24	95594	15	19	95595	11	19	95591	16	20	95581	11	24	95598	26	32	95593	129	15	95593	130
N2:95765	chr02	95692	95838	+3:YBL067C;	4.51941	5	81	8.905	95761	475	18	95755	100	25	95765	74	24	95761	100	16	95760	82	17	95763	92	17	95761	113	20	95758	23	24	95767	6	35				95751	5	7	95752	25	18	95764	142	15	95756	175
N2:95932	chr02	95859	96005	+2:YBL067C;	5.73858	6	94.5	5.586	95935	710	15	95928	190	24	95933	135	18	95937	105	14	95934	103	15	95931	95	18	95934	204	14	95929	163	18	95924	20	11	95921	28	14	95938	21	12	95933	95	19	95936	365	12	95934	311
N2:96101	chr02	96028	96174	-1:CUT006; +1:YBL067C;	3.46866	5	47	18.606	96099	31	22				96089	4	18	96170	10	49	96108	13	23	96121	5	17	96121	22	29	96088	39	31										96110	29	41	96149	5	26	96168	19
N2:96386	chr02	96313	96459	+1:CUT006; -1:YBL067C;	2.1977	5	49.67	30.924	96318	114	21				96409	11	36	96395	10	40	96409	13	39	96411	7	25	96316	28	30				96396	6	24	96413	9	37	96375	5	35				96315	1	0	96326	4
N2:96564	chr02	96491	96637	+25*:YBL066C; +2*:CUT006;	1.42405	2	100	19.799	96569	203	31				96578	20	28	96574	33	26	96570	31	23	96574	9	39	96531	18	36	96574	76	30	96568	7	24	96574	11	22	96572	2	3	96575	25	33	96516	1	0	96494	4
N2:96735	chr02	96662	96808	+24:YBL066C;	5.47047	6	100	8.311	96734	347	34	96753	81	35	96737	69	34							96755	71	21				96750	67	28	96733	6	9	96723	5	21				96741	75	26	96732	5	17
N2:96912	chr02	96839	96985	+23:YBL066C;	3.10822	5	100	22.242	96892	518	37	96976	105	38	96893	73	39	96895	76	35	96888	95	28	96931	77	36	96890	51	36	96949	17	44	96880	4	35	96900	3	18	96871	2	6	96891	55	34	96890	7	23	96892	11
N2:97213	chr02	97140	97286	+21:YBL066C;	3.27436	6	100	41.347	97199	788	32	97173	127	36	97207	98	36	97214	86	38	97193	157	31	97178	109	41	97194	53	29				97176	8	31	97176	9	39	97224	6	11	97238	38	37	97165	9	27	97176	11
N2:97458	chr02	97385	97531	+20:YBL066C;	2.68168	4	98.5	29.353				97476	106	30										97405	70	46													97450	3	25	97404	9	45
N2:97731	chr02	97658	97804	+18:YBL066C;	3.5924	5	92.67	16.078	97723	461	34	97723	114	36				97800	73	35				97721	95	36							97712	6	35	97718	6	23	97737	9	9				97721	12	26
N2:97904	chr02	97831	97977	+17:YBL066C;	2.87048	4	89	17.407																			97832	47	35				97927	5	29				97921	4	22	97845	14	26	97973	5	32	97832	8
N2:98203	chr02	98130	98276	+15:YBL066C;	4.36241	6	91.75	16.861	98179	709	25	98159	152	32	98175	96	33	98170	85	34	98167	121	26	98176	85	28	98163	44	34				98173	3	19				98135	4	32				98192	11	22	98162	19
N2:98377	chr02	98304	98450	+14:YBL066C;	4.32167	5	100	10.784	98344	763	24	98321	167	33	98369	116	35	98343	63	27	98333	134	26	98371	107	31	98360	36	32	98324	8	25	98417	4	36	98342	5	16	98322	4	29	98363	13	38	98340	19	20	98332	13
N2:98532	chr02	98459	98605	+13:YBL066C;	2.86841	4	100	27.178	98493	386	38				98555	97	41				98486	64	31				98584	30	40	98491	20	33	98566	2	21	98553	6	28	98494	3	22							98481	10
N2:98691	chr02	98618	98764	+12:YBL066C;	3.90361	6	93	27.301	98646	755	36				98711	80	38	98659	106	36	98655	149	34	98663	121	38	98742	36	33	98713	7	32	98725	4	21	98748	9	33	98659	10	32	98663	17	33	98653	28	33	98755	33
N2:98972	chr02	98899	99045	+10:YBL066C;	3.01085	6	100	27.223	98952	610	33	98944	196	29	98939	114	37	98945	92	37	98946	149	28	98949	114	34	98948	61	34	98926	54	30	98937	4	24	98938	18	33	98985	8	28	98944	25	35	98947	46	31	98939	62
N2:99162	chr02	99089	99235	+9:YBL066C;	4.27419	6	83.5	18.887				99154	146	34	99193	142	32	99151	81	33	99149	143	29	99159	84	33				99174	54	29										99174	35	29				99153	69
N2:99468	chr02	99395	99541	+7:YBL066C;	2.53113	5	89	31.958	99445	537	26	99428	138	30	99458	102	30				99434	135	24	99442	56	30				99424	31	37	99449	4	13	99467	5	19				99450	51	30	99443	146	26	99437	145
N2:99634	chr02	99561	99707	+6:YBL066C;	1.63945	4	67	28.721	99622	621	26	99589	151	28	99625	116	31	99610	74	27	99609	155	23	99627	89	27	99617	82	24	99613	35	37	99598	13	27	99620	17	35	99615	8	30	99620	42	25	99622	201	25	99614	224
N2:99794	chr02	99721	99867	+5:YBL066C;	4.47874	5	79.67	9.094	99789	354	27	99792	126	30	99790	75	33	99786	37	22	99783	92	26	99791	78	25	99787	58	27	99783	27	27	99797	10	21	99774	8	19	99781	7	9	99785	35	27	99787	163	20	99792	171
N2:99957	chr02	99884	100030	+4:YBL066C;	5.40759	6	65.25	8.542	99955	253	27	99958	92	36	99955	57	26	99957	33	30	99949	46	29	99957	68	26	99955	74	26	99943	20	32	99965	9	17	99962	8	24				99964	40	29	99954	130	22	99965	163
N2:100114	chr02	100041	100187	+3:YBL066C;	4.38757	6	91	15.096	100113	415	21	100122	162	25	100115	90	25	100110	63	18	100113	97	24	100116	85	22	100116	276	18	100115	102	17	100114	53	22	100115	49	17	100109	27	16	100112	57	21	100116	222	20	100125	408
N2:100396	chr02	100323	100469	+1:YBL066C;	2.21069	3	100	17.349	100405	291	19	100398	84	20	100398	27	26	100404	22	23	100405	63	22	100393	39	25	100409	191	22	100399	85	18	100414	21	27	100390	5	12	100373	3	16	100401	20	26	100406	38	14	100396	143
N2:100556	chr02	100483	100629	0:YBL066C; +5*:YBL064C;	4.81191	5	78	5.263							100566	29	27										100573	85	27				100576	14	30										100575	66	31
N2:100860	chr02	100787	100933	+3:YBL064C;	3.75493	5	93.67	27.862	100850	505	27	100845	102	27	100845	57	28	100843	44	24	100846	91	25	100846	84	27	100842	110	24	100845	75	27	100851	30	26	100844	32	23	100843	24	21				100846	166	22	100843	232
N2:101158	chr02	101085	101231	+1:YBL064C;	3.73788	5	100	19.665	101154	564	25	101145	80	25	101147	73	21	101140	44	26	101146	90	22	101140	110	23	101150	139	24	101148	111	26	101149	67	18	101140	37	10	101141	32	22	101142	155	21	101151	168	20	101150	524
N2:101323	chr02	101250	101396	0:YBL064C;	2.90283	5	67	34.217	101301	5	27							101291	1	0	101335	2	19				101300	1	0	101302	7	28				101311	1	0	101302	1	0	101357	3	14
N2:101663	chr02	101590	101736	-1:YBL063W;	3.12307	4	84	15.65							101726	9	21																									101665	12	25
N2:101913	chr02	101840	101986	+1:YBL063W;	5.58121	6	100	7.36	101915	556	19	101913	194	20	101915	107	22	101914	65	18	101916	82	22	101914	114	16	101917	166	18	101918	33	23	101918	63	19	101916	129	17	101915	54	18	101915	167	18	101915	214	15	101915	517
N2:102082	chr02	102009	102155	+2:YBL063W;	3.9879	4	100	1.5	102090	344	23	102070	151	22	102090	83	25	102094	41	25	102085	72	30	102084	74	24	102088	55	23	102072	17	19	102079	9	22	102079	16	24	102092	32	24	102086	24	25	102091	72	20	102086	157
N2:102248	chr02	102175	102321	+3:YBL063W;	5.65124	6	100	6.686	102250	813	18	102247	203	23	102249	117	26	102249	72	28	102247	112	27	102250	138	21	102251	128	23	102223	12	23	102248	17	20				102241	9	21	102255	30	22	102251	186	16	102255	267
N2:102417	chr02	102344	102490	+4:YBL063W;	4.53981	6	75.25	14.405	102425	370	23	102423	68	26	102405	85	25				102398	71	30	102415	66	23	102414	33	23	102419	12	29							102398	3	6	102406	13	18	102415	29	22	102421	37
N2:102580	chr02	102507	102653	+5:YBL063W;	4.69555	5	100	6.834	102586	464	27	102600	119	27	102562	73	29				102556	67	27				102583	79	27				102559	5	28	102557	6	19	102587	8	27	102582	37	27	102583	30	21	102586	22
N2:102891	chr02	102818	102964	+7:YBL063W;	4.6402	5	100	7.436	102910	361	27	102917	101	28										102908	53	27	102908	40	26	102943	11	15				102853	2	6	102914	4	42	102906	44	23	102907	15	16	102901	5
N2:103052	chr02	102979	103125	+8:YBL063W;	5.16162	6	100	10.69	103079	724	30	103092	187	31	103045	122	33	103040	85	38	103041	112	36	103063	94	23	103081	55	33				103043	6	23	103088	3	16										103087	7
N2:103301	chr02	103228	103374	+10:YBL063W;	2.59172	4	53	31.775				103246	93	32	103248	46	42	103316	26	37	103322	47	31				103239	25	32	103236	1	0	103316	2	3													103296	2
N2:103552	chr02	103479	103625	+12:YBL063W;	2.69898	3	70	9.713	103484	419	41	103483	131	34	103486	98	33	103483	108	34	103488	118	27	103488	59	33	103485	27	31				103575	3	17	103502	2	0				103548	6	34	103608	7	29	103617	3
N2:103709	chr02	103636	103782	+13:YBL063W;	2.79213	5	89	39.638	103777	565	37	103775	136	32	103728	74	40	103772	83	39	103770	97	33	103716	63	36	103778	40	33				103733	5	32				103724	1	0	103709	13	46	103775	7	27
N2:103908	chr02	103835	103981	+14:YBL063W;	2.93008	6	99.25	45.962	103955	484	36	103953	144	28	103965	75	31	103961	87	32	103952	100	37				103959	35	37	103942	10	27	103966	1	0	103980	4	20	103872	1	0	103882	6	33	103960	8	21
N2:104124	chr02	104051	104197	+15:YBL063W;	5.26614	6	93	10.893	104126	356	35	104125	89	28	104122	62	36	104127	52	38	104126	57	35				104128	21	29	104131	2	19	104143	1	0				104102	1	0				104117	2	25
N2:104283	chr02	104210	104356	+16:YBL063W;	3.03984	4	89.5	16.021				104284	106	32										104270	57	30	104280	29	31	104286	4	7										104283	18	24	104299	5	26	104285	3
N2:104435	chr02	104362	104508	+17:YBL063W;	2.56783	5	100	34.847	104385	473	36				104382	90	31	104371	101	32	104367	110	36	104436	64	35	104438	41	31	104489	3	8	104387	3	24	104368	1	0				104439	18	30
N2:104782	chr02	104709	104855	+19:YBL063W;	5.63191	6	100	6.911	104783	632	32	104788	196	31	104786	120	35	104785	100	37	104782	145	35	104784	101	27	104784	46	26	104796	6	17	104807	3	8				104782	1	0	104787	37	24				104785	5
N2:104967	chr02	104894	105040	+20:YBL063W;	3.5632	5	100	19.217																												104896	7	18				104986	23	35
N2:105124	chr02	105051	105197	+21*:YBL063W;	3.08915	5	100	25.657	105126	645	35	105112	211	34	105119	108	34	105124	97	38	105056	135	40	105058	91	41	105119	56	38	105123	18	39	105073	13	28	105116	7	28							105123	10	41	105107	4
N2:105334	chr02	105261	105407	+13*:YBL061C;	2.00253	4	8	33.506	105335	201	32	105332	53	29	105335	33	29	105334	37	34				105333	29	33	105331	22	25																105401	1	0
N2:105509	chr02	105436	105582	+12:YBL061C;	3.65638	6	100	25.398	105491	498	39	105489	119	40	105483	94	38	105492	90	39	105439	74	31	105488	69	38	105483	65	41							105581	13	38	105475	3	39	105476	34	26				105490	2
N2:105680	chr02	105607	105753	+11:YBL061C;	1.09261	3	100	26.153	105649	533	32	105641	160	26	105649	83	37	105657	66	35	105641	88	38	105639	90	24	105640	42	31	105630	20	13	105639	5	24				105634	6	13	105648	25	28	105645	12	18	105649	3
N2:105836	chr02	105763	105909	+10:YBL061C;	2.97972	6	86.25	34.085	105826	544	30				105826	129	31	105862	110	39	105810	119	31	105808	83	31	105820	70	33	105798	16	17													105867	32	31	105809	9
N2:106029	chr02	105956	106102	+9:YBL061C;	2.53541	6	94	39.369				106093	194	29	106082	100	43	106024	69	36	106092	114	38	106097	99	34	106004	43	34				105980	8	35				106094	10	16	106096	67	31				106092	4
N2:106274	chr02	106201	106347	+8:YBL061C;	3.33935	5	100	25.185	106301	543	35	106261	265	26	106292	122	37	106292	85	32	106281	131	30	106276	112	25	106236	66	37	106271	19	19	106237	6	44	106294	10	20	106268	7	29	106271	66	28				106282	14
N2:106494	chr02	106421	106567	+7:YBL061C;	3.2564	6	82.25	26.166	106450	483	31	106445	165	29	106446	92	38	106449	63	41	106445	99	29	106445	105	21	106448	48	22	106449	15	31	106448	11	30	106445	14	36	106446	5	19	106440	72	27	106452	47	28	106448	22
N2:106669	chr02	106596	106742	+6:YBL061C;	3.00873	6	97.25	28.507	106625	755	29	106611	175	32	106665	115	33	106621	101	31	106615	111	30	106609	103	26	106617	86	28	106609	29	24	106670	12	28	106612	11	23	106610	20	28	106615	66	36	106620	114	29	106614	61
N2:106963	chr02	106890	107036	+4:YBL061C;	3.28796	4	100	13.598				106935	110	36							106943	85	33	106938	50	31	106942	63	36	106949	42	32										106938	46	25				106941	85
N2:107122	chr02	107049	107195	+3:YBL061C;	4.20953	6	91.75	20.794	107115	371	26	107099	125	25	107122	45	27	107110	54	25	107109	49	23	107117	65	26	107117	133	26	107108	28	24	107098	5	25	107121	20	28	107101	10	24	107110	56	23	107105	151	29	107120	163
N2:107280	chr02	107207	107353	+2:YBL061C;	5.05587	6	99.25	11.25	107294	275	26	107279	83	28	107294	41	29	107295	36	18	107300	44	28	107288	42	24	107292	111	28				107291	12	14	107282	4	26	107291	2	14	107285	24	12	107291	147	24	107294	238
N2:107476	chr02	107403	107549	+1:YBL061C;	4.14291	5	93	11.824	107459	370	26	107461	123	27	107456	92	23	107459	73	23	107459	86	23	107461	92	24	107459	302	26	107452	111	30	107457	28	20	107451	10	25	107456	11	12	107460	24	21	107455	179	22	107457	311
N2:107706	chr02	107633	107779	-1:YBL060W; -1:YBL061C;	5.32888	6	100	9.39	107705	260	21	107702	178	21	107734	62	22	107708	34	22	107700	52	23	107698	49	26	107704	292	21	107704	139	23	107707	21	22	107701	9	38	107702	9	23	107720	42	25	107706	61	25	107710	219
N2:107924	chr02	107851	107997	+1:YBL060W;	3.96429	6	99	20.646	107929	411	23	107923	151	23	107931	76	22	107923	89	23	107925	74	24	107925	75	24	107934	216	24	107945	31	27	107929	18	16	107928	12	12	107934	7	28	107938	109	26	107931	219	24	107924	470
N2:108106	chr02	108033	108179	+2:YBL060W;	3.47915	4	100	10.863	108114	430	24	108114	103	32	108112	99	31	108104	57	29	108115	72	26	108118	72	28	108115	184	27				108104	17	24	108110	10	22	108122	5	26	108103	67	29	108115	257	24	108105	319
N2:108268	chr02	108195	108341	+3:YBL060W;	5.31305	6	89	9.579	108283	438	29	108276	138	34										108286	65	29	108282	114	31	108263	28	28	108300	10	31				108271	3	26	108269	24	32	108296	87	27	108284	114
N2:108439	chr02	108366	108512	+4:YBL060W;	5.24293	6	100	9.948				108424	75	27	108417	75	32	108418	59	26	108428	70	32													108402	5	12	108433	6	21	108481	70	35
N2:108587	chr02	108514	108660	+5:YBL060W;	3.80671	4	100	6.238	108577	558	27	108582	191	29	108575	120	27	108574	107	26	108579	109	25	108580	80	25	108576	95	28	108592	21	20	108602	26	22	108594	22	34	108592	8	31				108578	86	27	108583	61
N2:108769	chr02	108696	108842	+6:YBL060W;	3.58013	4	67	9.713	108748	362	35	108841	108	40	108738	73	36				108777	79	39	108837	56	41	108741	46	39	108745	12	30										108747	22	41	108755	29	23	108795	19
N2:108938	chr02	108865	109011	+7:YBL060W;	4.22955	6	90.75	21.417													108954	51	31							108941	9	38				108945	9	21	108947	12	27	108946	29	34
N2:109125	chr02	109052	109198	+8:YBL060W;	4.85416	6	97	27.262	109059	429	38	109127	104	41	109059	77	39	109056	42	33	109133	63	37	109055	47	30	109059	61	41	109137	22	31	109068	5	32				109126	4	34	109141	37	32	109057	17	31
N2:109327	chr02	109254	109400	+9:YBL060W;	3.53945	6	72.5	30.156				109324	124	33	109323	77	40				109329	79	30	109322	65	34				109317	22	20	109284	6	36				109291	6	30	109307	55	35				109255	8
N2:109641	chr02	109568	109714	+11:YBL060W;	3.63305	4	100	8.655	109653	385	32	109662	113	31	109660	66	38	109652	59	28	109661	67	30	109657	65	29				109649	26	24				109653	12	39	109664	11	27	109653	55	34				109658	10
N2:109812	chr02	109739	109885	+12*:YBL060W;	4.93895	6	94.75	11.928	109818	445	36	109839	113	29	109814	89	30	109817	85	32	109840	75	28	109816	63	31	109799	103	33	109841	18	30	109839	12	29	109800	5	27	109828	2	11	109816	38	23	109768	16	34	109837	15
N2:109992	chr02	109919	110065	+4*:YBL059C-A;	3.68055	4	50.5	8.18										109999	27	25	110014	32	17	110008	20	23				109991	17	25	109989	2	22	110006	3	16	109989	5	24	110013	14	20	110002	8	23	110002	14
N2:110161	chr02	110088	110234	+3:YBL059C-A;	4.34938	5	93	10.654	110147	208	31	110141	39	29	110163	29	26	110174	29	28	110191	35	29	110176	36	29	110145	87	28	110150	13	31	110183	4	23	110165	6	15	110156	10	20	110166	53	27	110154	45	25	110172	83
N2:110340	chr02	110267	110413	+2:YBL059C-A;	5.02933	6	86.5	11.9	110342	466	29	110345	183	32	110339	76	31	110343	74	25	110345	104	25	110336	85	28	110341	310	25	110334	102	29	110340	56	22	110341	29	30	110342	27	24	110336	116	29	110345	163	21	110346	265
N2:110526	chr02	110453	110599	+1:YBL059C-A; -1:YBL059W;	5.71277	6	96	5.865	110520	240	27	110532	65	26	110512	51	29	110518	39	27	110525	40	32	110510	42	24	110516	167	24	110506	60	25	110512	26	18	110513	8	21	110518	10	11	110510	91	27	110518	131	18	110534	183
N2:110728	chr02	110655	110801	0:YBL059C-A; +1:YBL059W;	4.4114	6	99.25	16.058	110736	439	23	110741	101	24	110740	64	28	110741	32	24	110740	55	21	110741	62	17	110737	313	21	110746	44	18	110742	28	16	110746	25	26	110747	15	25	110744	79	20	110735	100	19	110739	283
N2:111025	chr02	110952	111098		3.88164	5	63.33	17.869	111027	321	32	111026	130	26	111026	57	29	111025	36	31	111028	84	20	111028	64	30	111025	261	24				111041	24	20										111029	142	21	111030	196
N2:111173	chr02	111100	111246	-1:YBL058W;	5.1081	6	100	10.907	111176	232	22	111185	92	23	111183	50	28	111172	33	20	111179	61	25				111173	254	21	111174	16	19	111188	19	18	111164	17	14	111158	12	26	111174	138	22	111178	94	20	111188	142
N2:111454	chr02	111381	111527	+1:YBL058W;	5.78116	6	100	5.089	111453	385	19	111455	101	21	111456	55	23	111458	42	19	111452	73	24	111460	62	21	111455	147	18	111459	98	18	111453	16	12	111450	31	18	111438	11	18	111458	70	27	111457	124	21	111449	198
N2:111626	chr02	111553	111699	+2:YBL058W;	5.91989	6	100	3.061	111620	451	16	111620	160	20	111621	78	19	111620	60	24	111621	108	20	111620	84	17	111621	172	15	111623	131	8	111620	43	12	111623	18	19	111620	19	9	111623	99	16	111623	234	18	111619	365
N2:111778	chr02	111705	111851	+3:YBL058W;	2.88764	3	100	5.774	111767	455	18	111774	183	22	111769	99	24				111769	140	18	111772	72	21				111776	36	18				111782	12	23	111770	15	20	111772	62	21	111770	194	18
N2:111940	chr02	111867	112013	+4:YBL058W;	4.74975	5	67.67	6.107													111947	75	21	111950	69	31	111947	77	23	111952	15	30	111944	11	20	111930	15	28	111938	12	15	111944	32	27	111946	102	19	111941	102
N2:112237	chr02	112164	112310	+6:YBL058W;	4.20825	6	75.25	19.447				112225	116	29	112230	84	26	112227	41	26	112229	72	24	112222	71	14	112227	69	26	112225	23	29	112229	8	18				112233	3	11				112228	48	23	112227	45
N2:112408	chr02	112335	112481	+7:YBL058W;	3.93185	6	93.25	27.962	112404	352	27	112401	119	33	112393	74	28	112398	69	26	112400	96	25	112395	84	25	112402	73	29	112410	9	28	112409	4	9	112389	8	24	112403	17	36	112404	20	20	112401	90	24	112402	49
N2:112714	chr02	112641	112787	+5*:YBL057C; +9*:YBL058W;	4.76039	6	83.5	14.148													112740	40	36										112768	5	9	112642	6	41	112642	17	40	112733	10	27
N2:112892	chr02	112819	112965	+4:YBL057C;	5.61187	6	91.75	7.033	112913	549	24	112907	219	28	112906	111	29	112907	87	29	112908	121	24	112910	114	22	112912	157	25	112919	12	12	112921	6	26	112888	18	22	112905	28	21	112909	60	23	112912	125	20	112913	145
N2:113077	chr02	113004	113150	+3:YBL057C;	5.73982	6	100	5.574	113082	322	23	113095	115	25	113084	93	20	113082	62	20	113082	64	23	113083	61	22	113083	168	22	113091	13	13	113075	7	25	113076	13	16	113080	13	28	113079	84	20	113079	194	18	113085	178
N2:113241	chr02	113168	113314	+2:YBL057C;	5.44393	6	100	8.353	113248	451	22	113258	285	19	113257	105	21	113258	91	20	113251	91	16	113255	105	19	113256	307	24	113256	36	16	113254	26	15	113247	24	17	113238	23	34	113247	103	23	113257	284	17	113260	509
N2:113406	chr02	113333	113479	-1:YBL056W; +1:YBL057C;	5.66887	6	99	6.325	113409	372	19	113407	164	25	113411	70	17	113409	76	19	113405	111	18	113407	84	20	113410	218	19	113418	44	9	113417	25	17	113413	18	8	113411	27	12	113416	79	19	113407	139	14	113416	295
N2:113692	chr02	113619	113765	+1:YBL056W; -1:YBL057C;	4.55848	5	100	8.307	113697	279	19	113689	123	21	113697	65	21	113698	76	13	113699	74	15	113695	72	14	113695	347	16	113693	88	24	113695	34	12	113706	22	27	113698	19	24	113698	36	18	113696	211	15	113695	326
N2:113862	chr02	113789	113935	+2:YBL056W;	5.63947	6	100	6.626	113863	614	14	113865	218	17	113863	146	18	113862	113	15	113862	167	15	113862	159	14	113861	332	14	113865	46	20	113864	40	21	113864	17	13	113864	25	18	113864	97	19	113862	481	12	113862	739
N2:114027	chr02	113954	114100	+3:YBL056W;	5.60651	6	91	7.195	114028	377	21	114026	134	20	114029	55	17	114026	66	18	114024	89	15	114028	64	23	114027	135	18	114027	21	27	114027	11	13	114030	13	8	114033	7	11	114025	21	18	114025	132	18	114029	224
N2:114341	chr02	114268	114414	+5:YBL056W;	5.85213	6	94.5	4.183	114350	401	23	114374	112	28	114351	77	23	114344	73	20	114352	82	23	114346	94	24	114343	65	26	114345	11	22				114367	5	14				114339	13	28	114350	116	16
N2:114530	chr02	114457	114603	+6:YBL056W;	5.03272	6	100	12.47	114532	526	25	114538	157	26	114526	98	26	114529	83	32	114529	113	25	114529	98	27	114532	56	30	114547	16	21	114552	9	26	114526	3	24				114508	11	37	114527	73	24	114535	46
N2:114844	chr02	114771	114917	+8:YBL056W;	5.18233	6	85.75	10.172																114826	70	29										114834	5	22	114870	1	0	114781	11	28	114825	21	37
N2:115008	chr02	114935	115081	+9:YBL056W;	2.86408	3	100	6.351	115011	402	33	115012	162	33	115005	81	32	115000	85	30	115002	105	27	115000	87	32	115006	48	31				114992	9	16	115078	9	23	115024	5	31	114996	28	30	115012	25	27	115013	15
N2:115281	chr02	115208	115354	+11:YBL056W;	3.07021	4	81.5	14.886				115351	59	34				115309	68	38	115314	40	35	115312	46	41	115326	30	39				115312	1	0	115281	1	0							115316	6	30
N2:115504	chr02	115431	115577	+12*:YBL056W; +9*:YBL055C;	3.20414	4	51.5	14.652				115542	83	33				115545	22	39				115476	20	40				115503	5	30				115495	1	0				115486	2	13	115542	9	28	115501	5
N2:115670	chr02	115597	115743	+8:YBL055C;	2.64174	6	100	46.328	115674	342	41				115662	67	38	115693	58	35	115638	55	31	115649	70	38	115610	47	42	115683	13	28	115623	6	34	115683	6	16				115662	62	36	115698	20	33
N2:115855	chr02	115782	115928	+7:YBL055C;	3.65613	6	98.25	21.379	115849	367	28	115857	100	33	115857	76	31	115850	54	32	115846	79	32	115854	74	33	115852	65	34	115857	21	26	115860	13	22				115845	8	20	115871	57	30	115856	35	35	115852	28
N2:116036	chr02	115963	116109	+6:YBL055C;	4.49106	5	100	8.877	116026	470	37	116014	128	37	116021	105	35	116029	79	36	116033	69	34	116024	85	33	116028	67	34				116014	6	32	116030	11	19	116033	13	31				116040	80	37	116032	44
N2:116316	chr02	116243	116389	+4:YBL055C;	5.62701	6	100	6.919	116320	635	19	116322	212	20	116319	96	24	116323	64	22	116324	108	21	116323	94	20	116323	153	21	116327	45	19	116316	13	38				116332	6	24				116319	149	20	116327	192
N2:116499	chr02	116426	116572	+3:YBL055C;	5.67259	6	100	6.338	116490	540	22	116490	184	21	116499	136	21	116500	81	19	116500	147	20	116496	147	21	116490	321	20	116496	54	17	116489	15	17	116485	17	20	116487	12	17	116499	79	21	116489	425	18	116499	497
N2:116669	chr02	116596	116742	+2:YBL055C;	5.35092	6	99.25	9.333	116646	253	32	116676	132	32	116671	61	33	116661	38	27	116666	54	34	116683	51	31	116654	137	31	116667	44	32				116655	10	20				116673	30	32	116641	128	24	116672	207
N2:116847	chr02	116774	116920	+1:YBL055C;	4.80109	6	90	12.863	116829	222	23	116836	60	26	116833	65	22	116833	49	22	116832	62	24	116836	72	20	116822	365	26	116838	79	22	116833	31	18	116830	16	26	116832	10	17	116846	73	22	116821	156	21	116843	230
N2:117153	chr02	117080	117226		4.70384	5	100	6.656	117162	116	27	117163	81	31	117166	56	20	117165	52	21	117159	60	22	117167	51	20	117164	374	24	117161	442	24	117160	102	15	117161	19	20	117151	11	9	117158	375	24	117167	20	20	117165	139
N2:117313	chr02	117240	117386	-1:YBL054W;	1.00001	1	100	0	117317	10	34										117306	5	36
N2:117464	chr02	117391	117537	0:YBL054W;	2.71715	6	75	44.225	117470	285	25	117457	175	23	117451	126	18	117452	144	19	117455	97	22	117451	100	19	117476	298	27	117469	142	27	117454	20	20	117456	12	19	117472	5	18	117444	37	22	117463	129	25	117450	193
N2:117637	chr02	117564	117710	+2:YBL054W;	4.52038	6	100	15.007	117649	557	25	117646	213	21	117641	121	22	117637	69	19	117637	90	21	117638	71	18	117652	430	26	117649	86	33	117638	13	29							117633	67	26	117651	388	22	117643	396
N2:117814	chr02	117741	117887	+3:YBL054W;	4.52902	5	100	8.643	117816	344	30	117805	138	22	117797	89	23	117799	50	24	117796	94	26	117800	81	20	117820	154	31	117805	48	31	117792	9	23	117777	12	22	117782	13	22	117791	80	29	117815	212	26	117799	188
N2:117982	chr02	117909	118055	+4:YBL054W;	5.16648	6	81.25	12.465	117996	350	29	118005	131	32	117969	84	28				117975	49	33				118006	108	33	117983	48	31				117985	13	27	117957	11	19	117962	62	32	118007	139	30	117971	68
N2:118142	chr02	118069	118215	+5:YBL054W;	4.89476	5	70.67	3.912	118165	300	31							118117	57	27	118158	56	33	118110	61	30							118111	13	20	118147	17	31	118143	15	21	118144	55	32	118168	93	27
N2:118300	chr02	118227	118373	+6:YBL054W;	4.25031	5	81.67	12.57				118305	107	29	118298	77	28	118294	48	26				118283	76	28	118301	69	28	118303	37	26	118304	14	16	118306	8	10	118315	4	27	118301	42	33				118304	21
N2:118451	chr02	118378	118524	+7:YBL054W;	3.67278	6	78.75	26.306	118465	363	33	118463	87	32	118464	57	30	118466	68	26	118461	60	27	118462	83	26	118462	79	33	118466	17	40	118474	7	22	118465	12	32	118469	6	16	118485	30	31	118471	46	31	118458	21
N2:118611	chr02	118538	118684	+8:YBL054W;	2.95114	4	100	18.099	118647	498	30	118632	224	27	118639	139	24	118643	118	25	118644	83	23	118637	103	24	118644	150	28	118615	23	34	118642	14	17	118641	35	29	118634	16	28	118640	76	32	118649	83	24	118645	34
N2:118790	chr02	118717	118863	+9:YBL054W;	3.22515	5	87.67	26.216	118820	271	33	118817	114	30	118815	69	21	118816	59	28	118821	62	30	118817	42	32	118820	55	32				118824	2	0	118813	8	37	118819	7	28	118793	39	31	118820	24	37	118812	9
N2:118963	chr02	118890	119036	+10:YBL054W;	4.50846	6	100	15.211	118975	397	30	118980	161	27	118975	83	30	118984	48	28	118982	83	30	118983	49	29	118975	94	32	118966	16	21	118984	14	19	118969	10	16	118979	12	32	118957	63	27	118984	26	33	118968	12
N2:119128	chr02	119055	119201	+11*:YBL054W;	4.49697	6	75.5	15.237	119142	181	27	119146	60	34	119143	45	23	119148	28	20	119148	39	32	119135	37	33	119143	34	32	119144	6	13	119133	3	23				119153	7	10	119133	15	34				119129	9
N2:119334	chr02	119261	119407		1.00085	2	95	45.255	119354	119	39	119335	37	33	119330	19	40				119372	27	50				119320	22	51							119267	3	34	119342	3	25
N2:119497	chr02	119424	119570		3.8662	6	100	20.637	119502	576	38	119500	218	37	119526	133	35	119494	126	37	119524	109	29	119494	95	35	119516	116	37	119445	21	23	119487	6	28	119553	22	38	119490	13	27	119470	34	33	119502	15	26	119477	5
N2:119702	chr02	119629	119775		2.62333	5	79.67	33.141				119773	119	38	119705	92	42	119713	57	42				119772	78	38	119766	59	41	119723	28	37	119771	4	12	119718	5	34	119684	4	42	119657	18	31	119770	9	32	119694	8
N2:119942	chr02	119869	120015		3.51823	6	73.75	31.032	119959	287	35	119953	87	35				119982	45	34	119945	39	27	119951	50	31				119949	7	29							119945	2	11	119880	2	9				119904	3
N2:120134	chr02	120061	120207	+13*:YBL052C;	3.47154	6	100	21.785	120124	538	34	120122	119	36	120120	93	36	120140	87	30	120129	78	34	120118	77	36	120128	52	35	120128	14	33	120106	1	0	120120	8	33	120129	6	20	120079	9	38	120122	5	23	120174	3
N2:120335	chr02	120262	120408	+12:YBL052C;	4.28851	6	97.25	17.717	120327	301	33	120333	93	40	120340	55	38	120340	63	35	120332	67	33	120337	42	41	120313	25	33	120339	20	40	120342	6	41				120363	1	0	120327	3	13	120339	6	35
N2:120504	chr02	120431	120577	+11:YBL052C;	4.66668	5	68.67	7.092	120533	388	36	120548	92	35	120530	74	31	120528	71	31	120538	51	34	120528	72	29	120576	32	39	120566	13	28	120567	6	35	120521	13	32							120499	3	31
N2:120678	chr02	120605	120751	+10:YBL052C;	3.72426	5	100	17.053	120738	455	41	120712	146	36	120700	74	37				120732	58	41	120704	58	31	120747	44	37	120747	8	24	120720	6	31	120732	4	34	120624	1	0	120650	8	38	120711	12	40	120646	4
N2:120862	chr02	120789	120935	+9:YBL052C;	2.94367	5	78	33.38	120912	301	38	120882	88	38	120903	49	41	120797	59	38				120874	50	41	120898	23	46				120900	5	37				120887	7	40	120835	17	26	120865	11	36	120901	2
N2:121120	chr02	121047	121193	+7:YBL052C;	2.74402	3	100	8.888	121119	449	31	121105	93	37	121121	57	33	121117	75	33	121105	58	29	121145	38	28	121131	56	28	121067	10	31	121097	2	12	121120	4	12	121124	3	11				121132	18	32	121121	19
N2:121409	chr02	121336	121482	+5:YBL052C;	4.25681	6	94.75	18.844	121417	401	28	121409	113	31	121427	69	29				121410	77	29				121423	55	25	121403	31	29	121430	10	19				121427	10	36				121415	28	36	121422	53
N2:121588	chr02	121515	121661	+4:YBL052C;	5.69294	6	100	6.282	121589	283	21	121592	95	18	121593	51	23	121590	39	25	121591	54	11	121598	24	24	121592	80	21	121593	8	25	121591	8	21	121595	5	8	121590	5	8	121637	14	42	121591	58	22	121590	114
N2:121751	chr02	121678	121824	+3:YBL052C;	5.8407	6	99.25	4.336	121756	184	23	121770	64	28	121780	53	28	121762	33	25	121755	45	30	121790	31	28	121763	60	26	121787	11	34	121768	4	21	121766	3	4	121801	9	25	121788	113	27	121758	54	25	121756	108
N2:121913	chr02	121840	121986	+2:YBL052C;	3.83644	5	85.33	14.663				121944	56	28				121946	20	27							121938	35	30				121941	4	19							121956	20	30	121906	49	27	121905	67
N2:122095	chr02	122022	122168	+1:YBL052C;	4.81462	6	94.75	12.896	122098	638	21	122093	189	20	122094	119	23	122096	123	18	122097	115	20	122096	64	23	122100	250	24	122094	17	21	122102	11	23	122105	9	19	122069	14	43	122114	45	26	122103	179	21	122097	382
N2:122367	chr02	122294	122440	+2:Unit008; -1:YBL052C; +16*:YBL051C;	2.96337	4	54	17.481	122369	220	24	122361	84	20	122373	21	21	122381	38	18	122375	28	20	122359	30	24	122369	26	20	122391	7	33	122371	3	6	122398	7	23	122396	2	20	122374	6	21	122370	7	12	122358	24
N2:122533	chr02	122460	122606	+1:Unit008; +15:YBL051C;	3.63945	5	81.67	17.53	122539	50	29	122534	22	32	122551	6	25	122548	6	10	122541	12	36	122538	19	24	122538	5	27	122549	6	31							122555	4	32							122559	2
N2:122742	chr02	122669	122815	-1:Unit008; +14:YBL051C;	2.53452	4	100	28.088							122736	50	30	122739	64	24																122693	1	0	122729	1	0
N2:122902	chr02	122829	122975	+13:YBL051C;	1.96238	4	100	30.489	122859	521	28	122846	157	26	122953	93	37				122866	95	33	122859	77	35	122857	50	37	122845	6	11	122854	10	23	122857	13	19	122896	7	28	122882	25	32	122857	13	33	122857	8
N2:123077	chr02	123004	123150	+12:YBL051C;	4.53024	6	92	20.498	123029	611	38	123082	193	32				123033	86	37	123036	111	33	123037	106	37	123032	45	36	123106	4	30	123089	11	26	123076	6	7	123124	8	18	123046	25	20	123030	28	37	123048	8
N2:123251	chr02	123178	123324	+11:YBL051C;	2.02202	4	93.67	26.683	123178	263	38							123196	50	39				123189	50	44				123279	15	38	123258	3	35	123267	10	33				123320	16	37
N2:123529	chr02	123456	123602	+9:YBL051C;	3.84369	5	98	20.285				123576	221	30							123594	135	39	123559	140	31				123564	7	20										123558	15	35	123469	42	31
N2:123722	chr02	123649	123795	+8:YBL051C;	1.53187	4	72.5	48.874				123726	152	33																						123654	7	27	123788	5	22
N2:123976	chr02	123903	124049	+6:YBL051C;	4.27734	5	80.67	11.389	123964	412	31	123917	147	33				123972	65	31	123955	86	28	123985	69	37	123963	31	28							123914	10	31	123971	2	3	123961	11	34	123959	87	22
N2:124134	chr02	124061	124207	+5:YBL051C;	2.81445	4	75.5	36.847	124126	249	28	124110	83	33	124135	55	40	124126	34	27	124117	39	29				124129	31	36	124104	1	0				124125	1	0	124137	3	6	124109	4	31	124130	37	35	124133	17
N2:124290	chr02	124217	124363	+4:YBL051C;	3.77863	5	100	16.652	124292	542	24	124289	141	32	124297	78	24	124298	109	25	124290	86	27	124300	83	25	124294	62	19	124287	15	23	124300	7	13	124295	10	10	124309	4	37	124285	6	18	124296	105	24	124291	98
N2:124457	chr02	124384	124530	+3:YBL051C;	4.20306	5	65.33	11.446	124451	339	25	124437	101	27	124466	60	20	124454	63	21	124447	76	23	124463	65	20	124448	56	23	124438	15	41				124471	4	19				124457	10	14	124454	109	17	124453	150
N2:124612	chr02	124539	124685	+2:YBL051C;	5.46752	6	94.75	8.167	124619	329	18	124619	106	19	124618	57	27	124614	36	23	124614	60	18	124621	60	18	124618	64	17	124614	17	10	124617	6	11				124615	5	6	124619	24	21	124616	122	18	124616	122
N2:124782	chr02	124709	124855	-1:YBL050W; +1:YBL051C;	5.87591	6	100	26.69	124782	348	19	124782	144	21	124784	93	14	124783	76	15	124780	111	17	124785	87	16	124782	269	15	124783	64	12	124779	24	19	124787	15	22	124783	19	12	124785	121	13	124782	248	11	124785	275
N2:125091	chr02	125018	125164	+1*:YBL050W; -1:YBL051C;	5.86114	6	100	4.033	125096	644	10	125095	167	14	125097	81	18	125098	118	10	125097	73	16	125098	103	12	125096	551	10	125096	127	15	125095	48	7	125099	34	13	125098	38	12	125095	89	12	125096	229	11	125095	565
N2:125254	chr02	125181	125327		5.49196	6	80.5	8.4	125253	171	22	125254	51	22	125251	29	15	125257	18	15	125255	23	18	125252	38	23	125256	56	20	125265	11	13	125249	5	26	125249	5	18	125257	10	4	125254	32	29	125256	64	13	125256	124
N2:125413	chr02	125340	125486		3.56623	5	86.67	17.3	125420	545	20	125426	139	26	125413	85	27	125417	60	20	125415	79	28	125420	78	24	125417	183	21	125459	26	26	125418	17	22	125433	17	20	125416	15	16	125415	45	19	125421	225	17	125419	280
N2:125569	chr02	125496	125642		3.89233	5	100	23.732	125573	584	21				125567	87	19	125571	51	21	125569	73	24	125571	97	20	125571	98	23				125569	11	20				125573	11	9	125572	27	34	125573	136	22	125573	159
N2:125898	chr02	125825	125971		5.40105	6	91.75	8.758										125908	38	29	125893	50	36	125894	66	30	125900	60	32													125904	27	27				125886	29
N2:126059	chr02	125986	126132		3.07647	5	76	20.736	126059	314	23	126058	79	22	126058	57	24	126059	48	10	126058	54	20	126059	63	22	126059	62	16	126039	16	26	126054	15	24	126054	11	12	126043	8	10	126062	24	28	126058	31	15	126053	20
N2:126353	chr02	126280	126426	+8:SUT438;	3.37046	5	100	22.59	126342	274	35	126283	71	38	126330	36	35	126387	33	41	126341	35	39				126382	165	38				126334	46	31	126335	41	27	126284	21	29	126425	112	40	126335	14	29
N2:126534	chr02	126461	126607	+7:SUT438; -1:YBL049W;	3.65997	5	99	24.191	126546	207	34	126489	51	40	126542	30	35	126555	6	26	126553	30	32				126544	93	35				126535	21	37	126547	15	31							126556	19	23	126469	25
N2:126688	chr02	126615	126761	+6:SUT438; 0:YBL049W;	2.29469	5	78	32.031				126760	126	30																126735	335	30	126730	46	30	126727	33	29	126725	19	37
N2:127050	chr02	126977	127123	+4:SUT438; +2:YBL049W;	3.06627	6	97.25	35.963	127032	357	38							127028	50	36				127095	54	36	127034	159	37	127090	32	34										127103	80	33	127032	84	34
N2:127202	chr02	127129	127275	+3:SUT438; +3:YBL049W;	5.07547	6	95.25	12.624	127194	341	31				127131	87	37	127194	71	34	127200	65	30				127196	190	32				127149	22	38	127183	17	35	127202	20	21				127198	115	27	127129	169
N2:127370	chr02	127297	127443	+2:SUT438; +4*:YBL049W;	4.53241	5	85.33	8.62	127345	236	26	127332	76	39	127342	60	34	127427	13	39				127335	40	36	127344	104	30	127392	14	26	127336	9	28	127339	8	19				127345	8	14				127340	82
N2:127531	chr02	127458	127604	+1:SUT438;	2.9968	4	78	34.51	127525	160	31				127533	21	33				127523	30	33				127525	86	28				127571	3	27	127566	3	19	127525	5	24	127519	5	49	127531	31	34
N2:127795	chr02	127722	127868	-1:SUT438;	2.83715	3	39	7	127752	223	37				127780	35	34																127761	6	23	127812	6	32							127739	18	38
N2:127974	chr02	127901	128047	+25*:YBL047C;	2.91278	4	66	22.396										127903	35	39				127904	39	43	128020	85	37				127909	6	34							127921	20	37	127924	17	31
N2:128239	chr02	128166	128312	+23:YBL047C;	2.92531	6	90	49.869	128240	339	38	128228	107	36	128239	65	41	128252	49	35	128246	61	36				128169	62	43	128306	2	27				128219	3	5	128238	3	26	128217	16	41				128236	10
N2:128395	chr02	128322	128468	+22:YBL047C;	3.00013	4	100	36	128397	586	28	128395	156	31	128404	134	27	128402	108	31	128399	159	29	128400	140	31	128395	122	28				128407	10	13	128402	4	32	128396	12	40	128403	19	35	128395	29	22	128401	16
N2:128557	chr02	128484	128630	+21:YBL047C;	2.56026	5	100	31.342	128544	410	30							128605	57	37	128617	89	39							128510	11	14				128614	9	32				128601	12	33				128548	9
N2:128853	chr02	128780	128926	+19:YBL047C;	3.6691	4	89	8.165	128860	471	27	128863	105	30	128876	96	31	128870	66	35	128861	94	33	128881	79	36	128864	53	33	128840	11	18	128888	6	37				128869	14	34	128868	22	31	128869	16	27	128872	9
N2:129108	chr02	129035	129181	+18:YBL047C;	5.04304	6	100	11.472	129078	364	33	129072	109	32	129071	79	37	129074	56	35	129077	80	35	129068	68	35	129083	49	22	129073	17	26	129066	7	11				129072	5	12	129133	23	34	129076	13	40	129109	10
N2:129271	chr02	129198	129344	+17:YBL047C;	4.7314	5	100	6.403	129261	608	30	129283	135	33	129262	97	35	129290	88	39	129277	110	31	129270	102	36	129265	46	29	129288	8	42	129269	5	14	129231	4	17	129275	6	38				129262	14	27	129275	10
N2:129469	chr02	129396	129542	+16:YBL047C;	2.44894	4	83.5	46.39	129445	538	39	129460	145	32	129472	100	39	129461	79	41	129471	113	42	129467	91	37	129474	35	41				129482	3	34	129469	6	22				129414	6	43	129484	12	34	129467	11
N2:129627	chr02	129554	129700	+15:YBL047C;	2.59854	5	83.33	32.764				129693	135	36	129696	120	37							129643	91	37				129634	3	11				129649	2	29	129576	5	31	129577	1	0	129635	6	58	129636	6
N2:129777	chr02	129704	129850	+14:YBL047C;	2.90412	5	79.67	30.987	129719	521	35							129718	92	35	129725	112	32	129808	66	40	129720	31	29				129799	4	31	129821	3	0				129831	4	33	129848	13	24	129833	2
N2:129991	chr02	129918	130064	+13:YBL047C;	5.38191	6	83	8.967	129996	541	37	130002	124	31	130017	103	36	129999	94	36	130008	105	30	129987	97	39	129995	39	38	129999	8	14	129999	6	23	130006	7	22	129997	5	23	129990	10	29	130026	14	37	130004	4
N2:130160	chr02	130087	130233	+12:YBL047C;	2.67445	5	99	35.465	130182	636	31	130177	165	33	130193	127	37	130181	63	31	130192	131	34	130179	87	36	130178	50	31	130219	6	20				130176	9	29	130193	10	13	130179	5	25	130184	14	21	130191	10
N2:130370	chr02	130297	130443	+11:YBL047C;	1.97578	4	66.67	38.561	130351	468	28	130358	130	33	130354	112	36	130332	71	31	130360	117	26	130372	84	35	130386	37	38				130424	15	25	130372	5	17	130373	4	26	130401	17	33				130369	12
N2:130592	chr02	130519	130665	+10:YBL047C;	3.98619	6	72.5	26.628				130604	90	37	130598	84	31	130596	39	35				130599	72	30	130595	37	35	130657	6	32				130602	7	24	130539	9	36	130597	8	39				130527	5
N2:130745	chr02	130672	130818	+9:YBL047C;	2.89833	4	75.33	29.354	130683	514	38	130773	167	35	130782	123	41	130776	100	38	130684	92	41	130777	80	44	130775	57	41							130785	12	32	130780	18	20				130686	21	28	130709	15
N2:130954	chr02	130881	131027	+8:YBL047C;	1.35932	4	56.5	38.803	130964	492	32	130951	144	28	130949	96	35	130952	77	30				130933	101	37	130964	57	29				130958	5	16	130962	5	24	130999	2	10	130896	9	38	130967	34	27	130954	14
N2:131123	chr02	131050	131196	+7:YBL047C;	2.76326	5	99	41.603	131134	493	31	131113	140	27	131111	111	34				131132	106	38	131110	109	38	131128	53	28	131096	8	39	131113	3	30				131160	9	31				131134	57	24	131125	27
N2:131360	chr02	131287	131433	+6:YBL047C;	3.98405	6	80	29.378	131349	523	29				131362	138	34	131361	100	23	131355	94	29	131362	101	26	131361	72	33	131303	6	45							131354	4	9	131356	15	26
N2:131527	chr02	131454	131600	+5:YBL047C;	3.21739	5	70.67	25.832										131544	37	36										131472	11	26	131518	5	27										131463	76	27	131454	44
N2:131813	chr02	131740	131886	+3:YBL047C;	3.12535	4	98.5	15.174	131813	298	23							131816	42	25							131813	56	23													131810	21	36	131814	188	15	131811	179
N2:131971	chr02	131898	132044	+2:YBL047C;	4.72208	6	83.5	13.934	131967	353	29	131945	157	24	131951	79	39	131969	49	35	131958	78	26	131957	91	27	131966	72	30	131947	26	16	131962	6	26	131931	5	31	131969	5	12	131966	35	31	131970	137	24	131969	229
N2:132165	chr02	132092	132238	+1:YBL047C; -1:YBL046W;	5.06951	6	72	11.827	132162	123	25	132175	43	25	132146	22	24	132130	12	28	132166	35	35	132168	18	29	132168	57	23	132157	38	18	132142	11	19	132115	15	22	132157	3	5	132156	25	29	132174	23	29	132169	81
N2:132456	chr02	132383	132529	-1:YBL047C; +1:YBL046W;	5.20194	6	100	10.206	132458	481	21	132455	194	25	132458	112	22	132459	87	24	132460	96	24	132460	84	24	132457	164	22	132460	19	37	132463	17	15	132468	11	29	132465	15	32	132458	42	23	132456	212	19	132454	348
N2:132612	chr02	132539	132685	+2:YBL046W;	3.96615	5	67	18.199	132624	218	34	132614	57	37	132607	56	37	132619	32	24	132612	34	28	132618	36	32	132626	20	35				132613	1	0				132613	8	3	132610	15	29	132618	44	30	132620	91
N2:132804	chr02	132731	132877	+3:YBL046W;	5.36236	6	100	9.048	132806	772	19	132807	225	20	132806	113	23	132803	115	19	132804	135	20	132804	130	19	132809	115	20	132820	25	18	132769	10	29	132815	16	12	132798	6	23	132803	28	16	132803	131	14	132805	203
N2:132973	chr02	132900	133046	+4:YBL046W;	4.38841	5	100	10.065	132968	411	25				132967	89	32	132967	62	21	132967	69	25							132972	14	24				132968	5	12	132977	10	9	132965	14	32	132971	76	21	132969	48
N2:133126	chr02	133053	133199	+5:YBL046W;	3.04918	4	100	16.317				133081	174	25										133081	92	25	133084	69	24				133097	5	5				133144	2	33
N2:133293	chr02	133220	133366	+6:YBL046W;	4.04199	5	100	14.293	133260	428	28	133257	133	23	133277	101	28	133270	64	25	133272	80	31	133267	91	24	133269	62	32	133260	7	23	133272	7	36	133258	9	25				133276	39	29	133258	29	30
N2:133478	chr02	133405	133551	+7*:YBL046W;	2.17545	4	100	26.875				133408	102	33				133430	44	28										133411	4	21				133470	10	32	133438	7	16				133426	21	28
N2:133725	chr02	133652	133798		2.22805	4	100	24.757				133719	66	30	133781	37	31	133779	30	37	133797	23	33	133793	24	33	133783	24	36				133725	6	21							133793	12	30				133786	2
N2:133883	chr02	133810	133956	+1*:Unit009; +12*:YBL045C;	1.00002	1	-2	0				133922	7	26																									133826	4	37
N2:134052	chr02	133979	134125	0:Unit009; +11:YBL045C;	2.90151	5	55	32.455	134046	201	38							134056	45	34	134044	35	30	134040	33	30	134112	15	31	134034	6	32				134086	4	25	134081	5	28	134097	1	0	134044	12	38	134041	11
N2:134212	chr02	134139	134285	-1:Unit009; +10:YBL045C;	2.86502	6	100	38.539	134222	296	35				134143	65	39	134226	37	31	134270	91	39	134228	84	34				134211	9	31													134214	32	37	134258	52
N2:134407	chr02	134334	134480	+9:YBL045C;	3.60098	5	99	33.484				134362	125	41	134429	74	38							134392	100	39	134362	25	38	134462	12	27							134371	10	38	134345	13	37	134373	53	40
N2:134693	chr02	134620	134766	+7:YBL045C;	2.13138	5	56	46.182																						134702	2	6							134691	2	33
N2:134863	chr02	134790	134936	+6:YBL045C;	1.07851	2	61	28.284				134929	92	33																134856	9	34							134909	7	23				134790	63	30
N2:135165	chr02	135092	135238	+4:YBL045C;	3.78886	5	87.33	15.271	135174	280	37	135121	83	28	135170	43	48				135108	60	35	135124	57	33	135117	41	33	135209	29	30	135163	14	25	135110	35	33	135134	15	33	135180	19	42	135166	97	38	135138	107
N2:135324	chr02	135251	135397	+3:YBL045C;	5.80603	6	100	4.792	135322	322	25	135319	51	32	135321	60	36	135319	25	24	135321	59	19	135320	55	32	135318	79	25				135320	12	31	135324	20	20	135327	17	23				135322	175	27	135321	167
N2:135484	chr02	135411	135557	+2:YBL045C;	3.48846	4	82	10.308	135495	150	31							135492	8	36	135481	32	31	135492	29	29				135479	61	36				135496	12	35	135503	23	30	135413	60	31	135497	72	37
N2:135674	chr02	135601	135747	+1:YBL045C;	3.97491	6	99.25	26.23	135663	287	27	135610	83	35	135661	41	32	135661	42	27	135671	38	30	135673	51	30	135666	390	26	135663	320	29	135663	62	26	135664	59	26	135665	45	23	135668	48	35	135666	116	23	135612	179
N2:135833	chr02	135760	135906	0:YBL045C;	2.85812	3	98.5	6.506							135824	1	0	135825	4	24	135840	2	3				135845	8	39	135821	2	1	135833	2	35	135867	2	25				135824	3	26	135845	2	6
N2:136108	chr02	136035	136181	-1:YBL044W; -1:YBL043W;	2.15179	3	89.5	18.735	136115	7	35	136046	6	3	136037	3	3										136117	12	25	136173	2	0				136141	1	0	136137	3	20	136131	10	21
N2:136386	chr02	136313	136459	+1:YBL044W; +1:YBL043W;	3.3416	4	88.5	12.5	136386	33	36	136389	14	27	136379	6	44				136389	9	35				136387	32	42				136388	2	31				136325	6	24	136396	17	38	136386	8	34	136400	34
N2:136561	chr02	136488	136634	+2:YBL044W; +2:YBL043W;	3.26106	4	100	13.226	136567	282	23	136565	54	29	136565	43	24	136563	39	22	136573	36	18	136569	29	23	136567	103	29				136560	5	9							136565	47	29	136566	66	29	136565	84
N2:136729	chr02	136656	136802	+3:YBL044W; +3:YBL043W;	2.64405	6	100	37.798	136735	276	30	136733	92	30	136742	56	28	136746	45	30	136758	58	36	136767	54	26	136739	108	31	136758	9	22	136724	6	15	136765	7	15	136766	6	27	136760	50	31	136738	112	28
N2:136922	chr02	136849	136995	+4:YBL044W; +4:YBL043W;	4.32097	6	91.75	21.766	136930	392	31	136923	131	30	136925	89	37	136926	48	24	136923	101	29	136921	98	22	136927	104	25	136928	12	30	136929	11	13	136925	24	15	136943	8	9	136926	32	30	136924	173	27	136876	212
N2:137083	chr02	137010	137156	+5:YBL044W; +5:YBL043W;	4.49559	6	88.25	15.639	137082	290	32	137089	117	32	137077	46	35	137081	52	35	137092	73	27	137079	60	32	137090	115	25	137090	10	30										137101	11	35	137083	88	32	137074	122
N2:137244	chr02	137171	137317	+6:YBL044W; +6:YBL043W;	2.91445	4	100	15.631	137250	285	31	137259	135	30	137248	68	38	137247	47	39				137252	57	30				137264	16	33				137230	29	34	137235	25	24				137250	116	31	137235	142
N2:137398	chr02	137325	137471	+7:YBL044W; +7:YBL043W;	2.71504	4	100	22.038	137401	236	29	137407	94	25	137413	47	35	137399	37	35	137401	70	28	137399	61	35	137400	130	30				137401	11	37	137408	23	25	137406	8	26	137353	49	36				137406	64
N2:137742	chr02	137669	137815	-1:Unit029;	3.46274	5	89	17.176	137723	121	23	137761	107	30	137724	29	30	137730	25	30							137729	62	28	137723	30	17	137723	8	12	137734	7	15	137717	11	22	137734	13	33	137723	14	32	137760	26
N2:137930	chr02	137857	138003	+1:Unit029;	4.76382	6	90	14.162	137908	177	26				137908	37	27	137902	67	24	137909	45	21	137895	53	34	137910	272	24	137936	40	24	137912	31	29	137933	10	24	137900	15	34	137910	144	27	137929	69	24	137926	23
N2:138198	chr02	138125	138271	+3*:Unit029; +13*:YBL042C;	1.71283	3	79	26.16							138147	54	32	138183	37	35	138178	43	33	138265	12	40				138182	3	46							138172	5	32	138268	5	35
N2:138415	chr02	138342	138488	+12:YBL042C;	4.24523	6	99.25	19.108	138468	493	41	138424	166	33	138453	111	34	138424	90	38				138425	140	33	138459	133	36	138476	17	27	138458	18	33	138474	27	34	138388	8	23	138421	28	29	138427	133	34	138465	37
N2:138573	chr02	138500	138646	+11:YBL042C;	2.29908	4	89	32.438				138641	74	40																			138611	5	25				138617	4	28
N2:138921	chr02	138848	138994	+9:YBL042C;	2.9862	3	93.5	2	138919	403	36				138918	120	38	138989	46	39	138917	127	37	138919	93	34				138916	17	24				138921	8	25	138917	19	31
N2:139068	chr02	138995	139141	+8:YBL042C;	1.89868	4	98.5	37.815	139083	271	39				139107	60	42										139005	37	35	139066	10	48	139071	4	9							139004	22	39	139068	41	40	139112	20
N2:139261	chr02	139188	139334	+7:YBL042C;	1.96605	4	100	46.235				139333	139	26							139323	91	33				139325	57	35	139237	8	33	139257	6	40				139238	12	35				139329	61	38
N2:139436	chr02	139363	139509	+6:YBL042C;	1.08312	4	100	51.11							139504	74	37													139415	18	36	139463	6	44				139401	9	28
N2:139615	chr02	139542	139688	+5:YBL042C;	2.62736	4	100	37.745	139622	457	38	139621	252	30	139678	82	34	139604	62	35	139609	125	31	139622	110	40	139620	81	40	139622	17	24	139681	10	38	139583	11	29	139594	11	31				139622	88	39	139623	95
N2:139791	chr02	139718	139864	+4:YBL042C;	2.04452	4	71	40.166	139790	268	38	139785	115	31				139785	40	34	139787	59	36	139795	57	34	139788	67	37	139779	15	44				139782	4	27	139789	14	29	139850	40	32	139850	73	42	139804	102
N2:140011	chr02	139938	140084	+3:YBL042C;	2.00194	4	90	43.589				140005	113	36	139955	65	42	139969	42	44	140047	65	30	140042	86	28	140002	103	36	140008	17	35	140008	7	24	140049	6	28	140021	10	32	140005	24	31	140008	122	42	139984	222
N2:140164	chr02	140091	140237	+2:YBL042C;	3.74125	6	100	21.931	140179	279	32	140170	154	20	140177	86	29	140186	54	24	140201	55	34																140190	14	15	140167	45	33	140174	98	29	140161	213
N2:140315	chr02	140242	140388	+1:YBL042C;	3.98431	6	86.25	27.291	140373	198	41	140367	108	34	140357	41	33				140372	65	31	140365	39	33	140308	183	37	140294	80	28	140314	14	35	140381	14	36	140378	21	45	140369	38	33	140374	66	41	140316	196
N2:140485	chr02	140412	140558	-1:YBL042C;	1	1	-2	0																140531	1	0				140490	3	11							140545	2	31	140521	4	30	140530	9	26
N2:140758	chr02	140685	140831		2.97755	4	69.67	17.115	140794	54	33							140760	2	1				140760	1	0	140785	46	32							140794	3	0				140795	13	39	140778	4	27
N2:140969	chr02	140896	141042	-1:YBL041W;	3.59121	6	97.75	34.534	140950	209	28	140960	74	20	140957	22	25	140954	36	25	140938	42	30	140958	44	28	140948	224	29				141038	19	33	140946	34	28	140932	41	17	140962	50	27	140953	17	33	140947	38
N2:141275	chr02	141202	141348	+1:YBL041W;	4.18964	5	88.33	12.239	141265	224	30	141247	55	37	141260	48	33	141262	36	20	141272	51	24	141267	47	33	141268	153	25	141253	65	30	141260	12	23	141269	11	14	141272	8	26	141277	64	26	141266	73	20	141261	120
N2:141436	chr02	141363	141509	+2:YBL041W;	5.29223	6	75.25	9.973	141435	259	33	141433	82	33	141427	28	24	141430	32	22	141433	46	28	141431	56	23	141433	111	22	141425	44	25	141445	15	26	141430	8	40	141439	6	14	141426	46	27	141431	137	20	141430	209
N2:141589	chr02	141516	141662	+3:YBL041W;	2.91285	4	60	29.961										141589	18	28										141596	16	35													141591	84	23
N2:141874	chr02	141801	141947	+5:YBL041W;	4.28763	5	89	11.798	141894	431	28	141894	136	29	141897	82	33	141900	70	26	141894	71	29	141897	102	23	141901	90	27	141913	24	33	141913	9	35	141896	6	34	141901	17	25	141887	32	24	141896	88	22	141900	165
N2:142045	chr02	141972	142118	+6*:YBL041W;	1.00016	2	100	50.205																						142083	2	20
N2:142201	chr02	142128	142274		4.5739	6	99.25	16.964	142203	391	27	142150	83	39	142210	58	26	142202	53	24	142204	87	25	142208	53	22	142205	86	27				142212	6	26				142218	6	30	142208	17	33	142200	52	30	142205	53
N2:142361	chr02	142288	142434		3.64285	5	100	22.627	142364	502	27	142355	148	29	142359	86	32	142363	79	26	142359	100	29	142364	76	30	142364	130	28	142342	14	23	142387	8	16	142306	7	23				142377	27	26	142360	147	24	142359	135
N2:142510	chr02	142437	142583		3.55119	4	53	9.912	142535	303	30	142502	139	29	142544	43	34				142542	52	31	142549	50	28	142540	91	29				142539	9	16	142488	10	35	142464	13	27				142540	82	25	142541	148
N2:142678	chr02	142605	142751		3.52789	6	99.25	20.963	142692	299	27	142687	97	29	142708	52	32	142697	29	21	142701	51	34	142711	70	35	142690	104	25	142686	24	22				142669	4	23	142699	5	18	142684	24	23	142699	91	28	142702	212
N2:142865	chr02	142792	142938	+1*:YBL040C;	5.11678	6	83.25	10.759	142860	289	25	142862	81	29	142861	59	24	142865	47	29	142861	59	29	142861	56	30	142862	237	20	142864	56	29	142858	18	17	142859	17	19	142864	10	14	142867	78	25	142863	174	19	142868	258
N2:143138	chr02	143065	143211	-1:YBL040C; -1:YBL039W-B;	3.10589	5	70.67	31.997	143135	214	37	143144	77	34	143122	36	36	143143	16	37	143138	35	33	143083	26	31	143133	106	33	143141	88	29	143131	14	32	143163	5	23	143136	3	23				143129	45	23	143134	133
N2:143297	chr02	143224	143370	+1:YBL039W-B;	4.02719	5	76	12.954	143307	127	30	143332	45	28	143311	22	34	143317	20	36	143288	31	30							143336	32	24	143291	3	28	143334	3	13	143335	4	29	143346	43	34	143295	22	23	143319	85
N2:143457	chr02	143384	143530	+2:YBL039W-B;	2.338	4	89.5	24.732				143489	110	28	143488	50	29	143495	41	31	143484	57	28	143483	46	36	143444	155	29	143498	33	26	143489	10	33	143493	9	27	143522	8	43	143507	80	30	143454	65	26	143489	154
N2:143746	chr02	143673	143819	+4*:YBL039W-B;	1.99136	2	100	2.121				143746	17	22				143738	18	28	143758	21	36	143749	19	17	143738	9	25							143772	6	8	143752	3	4	143739	19	35				143802	4
N2:144054	chr02	143981	144127	+12:YBL039C;	5.29994	6	100	9.39	144064	486	25	144069	159	30	144073	61	31	144067	56	33	144065	49	37	144070	44	33	144067	50	28	144072	11	33	144088	11	24	144072	4	29	144044	6	35	144059	64	36	144059	14	15	144066	8
N2:144234	chr02	144161	144307	+11:YBL039C;	4.32955	5	88.33	10.668	144232	368	30	144231	140	28	144228	63	35	144227	48	28	144228	79	39	144244	67	34	144236	35	42	144303	6	31	144297	9	40	144278	8	34	144226	6	31	144223	72	41	144230	11	22	144224	9
N2:144382	chr02	144309	144455	+10:YBL039C;	2.88276	5	70.67	34.071				144385	80	37	144441	53	42							144443	53	37										144453	8	38	144428	6	28	144421	51	41
N2:144659	chr02	144586	144732	+8:YBL039C;	4.01025	6	77.25	17.268	144646	413	36	144652	133	39	144650	102	39										144646	52	36	144711	6	48	144658	5	31	144622	6	27				144634	68	35
N2:144818	chr02	144745	144891	+7:YBL039C;	4.3811	6	92.5	15.88	144801	668	33	144801	204	41	144799	137	34	144793	99	35	144798	117	35	144792	129	31	144797	63	32										144745	8	17	144795	37	37	144798	64	26	144804	14
N2:144973	chr02	144900	145046	+6:YBL039C;	3.53791	6	85.5	26.918	144967	755	24	144965	237	31	144970	154	28	144964	138	28	144965	157	29	144967	165	29	144964	90	23	144977	9	20	144967	10	10	144975	14	19	144966	4	9	144968	29	28	144961	84	21	144966	26
N2:145131	chr02	145058	145204	+5:YBL039C;	4.63882	5	91.67	7.701	145132	439	23	145132	145	27	145131	107	27	145131	79	25	145128	95	22	145132	88	21	145130	51	25	145128	6	20	145133	6	21	145129	14	32	145133	3	29	145142	30	39	145132	95	19	145131	31
N2:145282	chr02	145209	145355	+4:YBL039C;	3.62649	5	59.67	20.067	145283	231	27				145289	58	31	145301	35	31				145287	44	25	145292	37	32	145293	3	8										145298	21	36	145286	52	21
N2:145585	chr02	145512	145658	+2:YBL039C;	4.89234	6	94.75	12.437	145599	374	29	145597	159	26	145601	115	22	145604	99	17	145604	103	26	145600	131	23	145593	143	26	145584	10	25	145598	10	7	145593	5	7	145563	2	16	145590	16	23	145596	202	20	145604	252
N2:145750	chr02	145677	145823	+1:YBL039C;	5.01085	6	100	11.514	145757	316	18	145761	136	27	145764	61	22	145764	62	16	145759	101	21	145762	89	18	145753	234	16	145761	22	20	145752	3	22	145776	5	8	145766	2	18	145762	13	9	145755	119	16	145761	126
N2:145921	chr02	145848	145994	0:YBL039C; -1:YBL038W;	1.01174	3	83.5	59.181	145965	65	5	145967	16	5	145965	10	3	145964	10	13	145969	12	9	145964	2	4	145966	21	6	145964	24	3	145966	7	3	145964	2	3	145967	6	4	145965	4	4	145959	2	3	145966	10
N2:146147	chr02	146074	146220	+1:YBL038W;	5.90167	6	91.75	3.386	146155	170	22	146130	69	28	146149	32	21	146149	33	26	146147	47	22	146146	22	21	146161	90	24	146148	40	16	146143	15	20	146153	14	24	146150	2	37	146141	26	27	146154	62	20	146135	160
N2:146325	chr02	146252	146398	+2:YBL038W;	5.48935	6	100	8.017	146324	383	20	146322	96	28	146322	56	25	146327	44	28	146327	64	24	146322	85	21	146322	135	22	146322	29	19	146315	16	23	146309	18	15	146329	8	8	146320	54	24	146324	198	14	146314	199
N2:146493	chr02	146420	146566	+3:YBL038W;	5.07297	6	89.75	11.635				146495	81	39				146476	31	26										146511	14	36	146485	11	26	146510	5	27	146476	10	21							146476	75
N2:146645	chr02	146572	146718	+4:YBL038W;	2.16092	3	34	19.399	146627	289	33				146617	62	40	146629	51	35	146612	56	39	146627	49	36	146631	101	32							146660	6	19	146676	7	29	146625	53	32	146629	111	31	146625	95
N2:146908	chr02	146835	146981	+1:CUT444; +6*:YBL038W; -1:YBL037W;	2.79027	4	64.5	30.544	146923	119	28	146920	35	38				146837	22	39	146922	26	26	146929	20	23	146923	95	26	146925	77	21	146922	8	22	146927	11	11	146934	6	19	146920	46	29	146933	15	22	146925	34
N2:147168	chr02	147095	147241	-1:CUT444; +1:YBL037W;	5.82544	6	86	4.535	147166	198	20	147163	59	30	147174	56	25	147160	47	22	147157	36	22	147171	21	32	147161	132	25	147178	17	28	147163	19	26	147160	4	27	147175	7	10	147165	42	26	147160	124	18	147171	151
N2:147341	chr02	147268	147414	+2:YBL037W;	4.24239	5	92.67	11.819	147337	641	18	147348	139	22	147337	106	24	147337	88	17	147339	101	24	147340	108	18	147337	283	19	147347	45	22	147339	20	19	147344	12	15	147335	13	15	147343	99	22	147337	277	17	147346	438
N2:147667	chr02	147594	147740	+4:YBL037W;	3.94753	5	100	14.149	147663	578	19	147685	157	22	147664	96	19	147662	89	20	147663	94	19	147663	81	17	147661	134	18	147690	9	29	147669	11	24	147663	20	18	147652	19	23	147666	44	27	147664	188	17	147664	186
N2:147968	chr02	147895	148041	+6:YBL037W;	2.40998	3	100	14.295	147991	574	28	148031	187	34				147986	83	24	147992	103	27	147985	91	27	147980	82	29	147994	9	20	147975	11	30										147988	40	24	147986	42
N2:148118	chr02	148045	148191	+7:YBL037W;	4.44323	6	88.25	22.624							148106	98	29													148189	7	26							148171	8	33	148105	19	32	148168	22	33
N2:148281	chr02	148208	148354	+8:YBL037W;	5.54603	6	99.25	7.627	148300	544	30	148212	168	26				148296	97	30	148299	94	32	148297	98	25	148292	59	28				148297	3	12	148215	2	6	148327	4	19	148296	39	32				148320	10
N2:148579	chr02	148506	148652	+10:YBL037W;	2.53661	4	88.5	21.093	148634	322	39				148633	63	39	148633	50	38	148635	57	41	148635	47	46				148568	5	21	148523	4	31				148512	7	39	148537	10	27	148631	2	0
N2:148882	chr02	148809	148955	+12:YBL037W;	4.69171	6	90.25	30.197				148882	112	37				148881	75	37				148885	65	30	148873	75	41	148868	15	38				148873	7	35	148815	6	45	148878	5	36	148878	11	22	148898	6
N2:149052	chr02	148979	149125	+13:YBL037W;	4.89578	6	99.25	12.671	149067	636	29	149055	174	24	149061	107	31	149062	110	26	149061	96	29	149057	97	33	149054	62	30	149062	10	32	149051	7	34	149054	15	22	149091	11	0	149057	19	37	149090	15	30	149076	2
N2:149356	chr02	149283	149429	+15:YBL037W;	3.87365	6	81.75	19.115	149423	544	43	149423	128	42	149367	116	40				149416	70	41	149361	83	39				149368	21	32	149418	13	30	149425	10	30	149351	6	32	149359	31	37	149371	6	35
N2:149525	chr02	149452	149598	+16:YBL037W;	2.97711	5	91.75	28.261	149579	555	41	149578	157	40	149574	108	38	149527	93	34	149577	128	39	149517	113	41	149527	63	40	149537	4	30	149586	10	33	149580	9	40				149531	27	37	149529	10	33	149540	6
N2:149735	chr02	149662	149808	+17:YBL037W;	2.24519	5	100	37.477	149737	257	40	149733	94	40	149743	30	41	149729	39	35	149740	37	44	149726	36	38	149683	31	44	149685	10	29	149789	7	47							149687	10	42	149740	6	26	149730	4
N2:149898	chr02	149825	149971	+18:YBL037W;	3.35797	6	100	32.638	149903	606	39	149912	223	35	149903	125	39	149908	95	39	149907	99	38	149915	136	36	149903	84	38				149959	14	34	149897	11	33				149891	22	32	149906	15	40	149902	8
N2:150052	chr02	149979	150125	+19:YBL037W;	2.31807	3	100	15.524	150051	298	44																			150050	16	34				150052	9	26	149982	13	31	150051	29	36
N2:150207	chr02	150134	150280	+20:YBL037W;	4.3043	6	100	26.546	150205	565	32	150209	130	30	150208	89	28	150205	97	33	150209	85	30	150208	92	25	150209	103	30	150275	8	24	150204	7	20	150206	7	33	150199	3	32	150212	20	21	150199	30	28	150206	6
N2:150361	chr02	150288	150434	+6*:YBL036C; +21*:YBL037W;	1.99136	2	67	2.121
N2:150534	chr02	150461	150607	+5:YBL036C;	3.79913	5	98.33	16.325	150506	295	28	150511	115	32	150497	53	32	150513	48	31	150505	54	31	150500	35	28	150504	45	28	150572	6	27	150512	4	26	150499	6	16	150500	3	16	150530	27	30	150509	46	28	150525	14
N2:150682	chr02	150609	150755	+4:YBL036C;	3.47224	6	99.25	23.279	150667	428	34	150670	143	39	150672	72	34	150682	47	30	150668	58	38	150670	49	36	150664	109	30	150741	10	39	150676	6	28	150674	10	37	150663	7	30	150681	15	42	150673	82	30
N2:150865	chr02	150792	150938	+3:YBL036C;	2.75839	4	89	19.841	150835	251	25	150839	42	22	150837	45	28	150837	32	25	150830	43	28	150841	49	24	150841	53	39				150841	6	30	150846	2	0	150831	6	9	150865	17	36	150843	74	29	150847	66
N2:151021	chr02	150948	151094	+2:YBL036C;	4.77866	6	100	13.664	151018	358	28	151031	142	28	151015	66	22	151025	48	23	151034	65	31	151041	88	26	151009	133	32	151030	14	28	151012	8	16	151008	7	18	151028	11	34	151018	27	23	151018	175	25	151031	256
N2:151197	chr02	151124	151270	+1:YBL036C; +16*:YBL035C;	4.22076	5	93	12.071	151193	293	27	151195	135	22	151190	53	26	151194	63	20	151192	76	24	151195	63	19	151190	226	21	151196	27	15	151201	8	7	151192	22	19	151191	11	17	151196	40	15	151193	152	16	151201	280
N2:151481	chr02	151408	151554	-1:YBL036C; +14:YBL035C;	5.79958	6	89.5	4.926										151502	42	31	151515	69	34	151494	49	25	151508	184	27	151480	27	27				151520	19	24	151496	9	20	151492	44	25	151492	111	21	151483	146
N2:151639	chr02	151566	151712	+13:YBL035C;	5.69093	6	100	6.088	151646	244	31	151640	90	32	151642	54	28							151641	34	41				151632	27	20	151642	25	25				151648	7	19				151646	72	26	151643	115
N2:151804	chr02	151731	151877	+12:YBL035C;	4.27937	5	100	11.014	151816	315	33	151806	93	34	151804	56	34	151815	64	32	151808	55	29				151810	119	26	151796	29	26	151802	14	21	151805	12	18	151812	7	8	151810	29	37	151807	40	29	151798	81
N2:151971	chr02	151898	152044	+11:YBL035C;	5.00804	6	99.25	11.64	151985	382	31	151963	141	33	151965	75	31				151984	65	26													152024	14	31				152028	53	39	151980	36	35	151963	126
N2:152127	chr02	152054	152200	+10:YBL035C;	5.55773	6	100	7.705	152195	292	48	152118	85	23	152120	62	37	152098	45	36				152067	41	41	152115	93	27	152104	47	27							152088	18	25							152117	127
N2:152287	chr02	152214	152360	+9:YBL035C;	3.92162	4	100	3.916										152321	55	35	152324	65	30	152337	50	25							152321	20	30	152266	14	29	152347	15	32	152325	57	30	152332	25	29
N2:152465	chr02	152392	152538	+8:YBL035C;	3.59042	6	100	25.727	152479	514	34	152467	200	26	152452	85	31				152481	94	33	152498	84	27	152480	137	30	152448	40	27	152526	17	34	152447	24	38				152500	65	29	152491	47	30	152473	209
N2:152659	chr02	152586	152732	+7:YBL035C;	3.01207	5	100	46.301	152658	538	37	152649	162	36	152702	65	37	152657	57	38	152653	79	36	152663	61	31	152658	135	32	152697	22	24	152704	16	31	152704	31	29	152648	15	21	152657	61	28	152657	43	32	152648	141
N2:152995	chr02	152922	153068	+5:YBL035C;	4.521	6	87.5	23.293	152993	399	31	152993	97	35	152994	64	30	152983	51	40	152994	52	26	152985	46	34	152997	70	34	152992	16	34	152998	4	36	152982	16	22				152993	15	25	153000	50	26	152977	73
N2:153155	chr02	153082	153228	+4:YBL035C;	3.26391	4	100	12.997	153149	385	22	153147	115	23	153149	78	23	153153	53	29	153145	66	24	153155	74	23	153150	89	24	153153	6	15	153185	15	26	153174	21	27	153140	11	18	153162	30	28	153148	125	24	153148	131
N2:153326	chr02	153253	153399	+3:YBL035C;	5.64402	6	87.5	6.563	153325	428	21	153327	87	31	153322	47	20	153319	44	26	153324	46	27	153324	61	21	153317	71	24	153347	11	42				153336	3	30				153333	9	44	153327	76	21	153326	92
N2:153500	chr02	153427	153573	+2:YBL035C;	5.24114	6	100	9.772	153504	492	21	153506	152	26	153512	113	28	153509	81	22	153503	73	22	153502	87	17	153506	105	26	153510	9	15	153507	4	12	153514	6	11	153501	5	31	153503	45	24	153504	146	16	153514	262
N2:153669	chr02	153596	153742	+1:YBL035C;	2.78893	4	30	19.432				153667	34	33				153740	12	28	153739	17	28							153675	3	52																153714	47
N2:153963	chr02	153890	154036	+30:YBL034C;	5.8179	6	100	4.648	153977	342	22	153976	141	19	153979	67	25	153968	56	25	153967	84	24	153970	72	21	153977	69	26	153966	10	26	153983	5	25	153948	4	15	153981	4	4	153972	31	29	153976	14	16	153971	21
N2:154143	chr02	154070	154216	+29:YBL034C;	5.71298	6	100	5.879	154150	578	23	154140	152	27	154147	102	28	154149	88	26	154146	87	26	154144	107	26	154146	63	23	154122	9	12	154143	8	29	154138	1	0	154143	5	16	154142	24	21	154149	18	17	154135	11
N2:154331	chr02	154258	154404	+28:YBL034C;	4.41474	6	100	16.183	154330	574	27	154320	111	27	154325	91	32	154328	77	33	154331	78	33	154325	74	24	154330	72	26	154403	3	10	154324	11	33	154305	4	30	154326	4	4	154329	12	25	154330	11	38	154321	10
N2:154491	chr02	154418	154564	+27:YBL034C;	5.51023	6	98	7.74	154496	490	31				154486	67	34	154503	92	37	154504	83	36				154490	37	30				154498	4	24	154518	6	29	154487	2	36	154490	7	17	154501	6	25	154481	2
N2:154663	chr02	154590	154736	+26:YBL034C;	2.99131	4	61.5	23.466	154659	574	27	154659	97	30	154667	88	30	154666	77	28	154664	73	26	154662	78	32	154661	51	18	154658	2	4	154659	9	9	154692	3	31	154668	3	33	154642	4	13	154666	10	13	154664	3
N2:154848	chr02	154775	154921	+25:YBL034C;	3.57416	6	100	28.28	154819	407	30	154913	136	41	154820	86	31				154899	62	37				154851	51	39				154827	2	20	154882	6	19				154815	9	23	154825	6	11	154845	7
N2:155262	chr02	155189	155335	+23:YBL034C;	2.83857	4	73.33	21.695				155283	123	39	155285	76	39				155280	82	39																155322	3	4
N2:155426	chr02	155353	155499	+22:YBL034C;	3.42769	5	81.67	25.821	155429	647	34	155435	133	31	155435	103	34	155432	112	32	155436	120	31	155422	100	30	155434	58	30	155370	5	26	155447	2	29	155375	9	23				155416	15	27	155401	10	31	155423	4
N2:155597	chr02	155524	155670	+21:YBL034C;	4.44952	5	70.33	9.607	155607	279	35	155598	62	36							155605	50	39	155619	35	39				155593	8	14				155650	3	29	155590	5	27	155574	6	31
N2:155766	chr02	155693	155839	+20:YBL034C;	2.1106	4	49	26.652	155759	249	41	155807	57	42	155822	38	43							155822	45	40													155755	1	0	155787	5	28				155767	2
N2:156039	chr02	155966	156112	+18:YBL034C;	4.21645	6	100	18.338	156106	459	37	156019	134	36	156099	75	35	156026	65	41	156027	114	30	156033	77	38	156105	25	36	156098	11	41				156090	2	19	156029	4	17	156012	9	47	156099	8	39	156107	4
N2:156258	chr02	156185	156331	+17:YBL034C;	2.2107	3	61.5	17.349	156286	349	34	156291	93	40	156279	44	39	156298	56	42				156285	59	38	156277	28	34	156245	2	10				156264	5	34	156276	3	6				156313	5	25	156266	2
N2:156516	chr02	156443	156589	+15:YBL034C;	4.13136	6	97.25	20.779	156487	709	33	156487	205	34	156480	125	36	156505	96	34	156515	161	30	156510	104	30	156517	75	29	156520	10	26	156487	8	27	156553	6	21	156535	7	28	156513	31	22	156485	11	24	156460	4
N2:156685	chr02	156612	156758	+14:YBL034C;	5.66891	6	83.25	6.346				156700	140	36	156678	98	36	156655	93	33	156675	89	27	156669	80	34	156691	57	32	156705	9	30	156644	6	20				156735	1	0	156680	8	37	156674	12	29	156685	4
N2:156963	chr02	156890	157036	+12:YBL034C;	4.90617	6	100	22.949	156922	684	34	156893	204	36	156926	126	39	156920	82	38							156921	69	36				156919	12	38	157021	1	0	156993	5	27	156948	13	21	156929	11	30
N2:157125	chr02	157052	157198	+11:YBL034C;	2.2121	3	1	17.01	157122	657	25	157064	87	39				157145	89	27	157139	123	22	157130	79	20							157149	3	8				157144	5	22
N2:157276	chr02	157203	157349	+10:YBL034C;	4.05434	6	89	29.412				157250	105	29	157262	65	30										157263	42	30	157223	2	14										157274	18	21	157260	13	22	157260	6
N2:157445	chr02	157372	157518	+9:YBL034C;	4.0464	6	94.5	18.162	157439	764	25	157434	163	32	157443	128	24	157451	83	26	157446	136	23	157444	120	23	157442	60	23				157435	7	15	157454	1	0	157439	4	8				157444	31	28	157440	10
N2:157609	chr02	157536	157682	+8:YBL034C;	3.09661	4	100	16.701										157628	60	31	157621	69	27				157601	29	33	157566	6	33				157617	3	1	157626	4	26	157573	13	25
N2:157759	chr02	157686	157832	+7:YBL034C;	3.37481	5	61.33	20.72	157749	522	26	157740	159	20	157748	76	29							157743	51	21	157753	38	28	157731	5	9										157747	10	26	157750	25	12	157749	22
N2:157919	chr02	157846	157992	+6:YBL034C;	5.26907	6	93.5	9.647	157921	616	21	157910	155	27	157930	82	26	157925	54	28	157920	91	27	157925	78	25	157917	53	26	157916	8	13	157905	4	11	157889	7	34	157915	5	6	157931	13	19	157921	87	21	157915	65
N2:158087	chr02	158014	158160	+5:YBL034C;	4.24788	5	100	11.158	158087	672	23	158087	232	26	158098	94	27	158092	70	26	158091	102	28	158090	111	23	158091	85	20	158074	7	17	158084	13	25	158088	12	20	158085	11	18	158081	27	20	158088	185	23	158095	202
N2:158256	chr02	158183	158329	+4:YBL034C;	5.75496	6	86.25	5.431	158254	387	21	158254	94	29	158264	69	22	158262	47	24	158257	70	34	158262	52	25	158255	63	22	158268	5	22	158254	9	24	158265	23	18	158258	5	11	158252	56	20	158252	87	18	158269	190
N2:158427	chr02	158354	158500	+3:YBL034C;	5.67475	6	100	6.38	158422	489	19	158427	171	21	158426	112	17	158427	58	17	158418	93	16	158422	61	17	158428	61	21	158432	16	30	158417	15	18	158424	19	18	158424	9	10	158419	21	14	158419	114	15	158428	227
N2:158707	chr02	158634	158780	+7*:YBL033C; +1:YBL034C;	4.95312	6	100	11.776	158709	481	23	158709	134	22	158715	85	21	158722	63	24	158717	86	21	158715	68	23	158716	87	22				158713	17	16				158725	20	26							158704	78
N2:158865	chr02	158792	158938	+6:YBL033C; -1:YBL034C;	4.97111	6	89.25	12.624	158860	307	28	158860	135	23	158862	71	29	158870	35	19	158865	100	26				158864	74	24	158841	12	19	158871	5	18	158870	18	12	158875	8	30	158848	49	24	158858	83	23	158864	103
N2:159039	chr02	158966	159112	+5:YBL033C;	4.77813	5	89.67	5.762	159031	287	29				159041	70	32	159023	25	25	159029	53	25	159038	67	29	159018	63	24	159053	17	23	159032	17	25	159018	7	21				159028	79	20	159017	113	21	159028	122
N2:159341	chr02	159268	159414	+3:YBL033C;	5.38654	6	75	8.756	159331	225	24	159330	85	31	159331	66	31				159333	70	28				159330	91	26				159342	15	23	159341	6	14	159332	20	16	159338	74	22	159332	153	23	159333	206
N2:159506	chr02	159433	159579	+2:YBL033C;	5.27614	6	96.5	10.407	159502	604	21	159501	155	24	159507	113	25	159509	67	16	159502	104	21	159505	87	19	159506	251	19	159510	11	11	159510	46	16	159511	50	15	159511	34	13	159506	92	23	159507	475	17	159507	618
N2:159667	chr02	159594	159740	+1:YBL033C;	5.84183	6	100	4.324	159666	345	23	159665	139	25	159665	105	25	159662	49	16	159666	75	20	159663	88	19	159664	488	19	159662	29	20	159663	40	16	159664	45	12	159666	53	10	159666	213	20	159665	317	16	159666	463
N2:159905	chr02	159832	159978	-1:YBL033C; -1:YBL032W;	1.00042	2	23	47.376	159858	4	2																159951	2	1													159977	1	0				159914	1
N2:160150	chr02	160077	160223	+1:YBL032W;	5.51349	6	91.75	8.01	160156	782	14	160154	319	17	160154	128	16	160154	82	11	160156	110	13	160153	115	13	160157	441	13	160148	38	10	160156	108	11	160152	111	10	160156	139	11	160153	100	14	160156	495	12	160152	619
N2:160315	chr02	160242	160388	+2:YBL032W;	4.67041	5	74.67	7.225	160312	171	21	160303	94	21	160311	45	23				160305	50	23	160307	35	19	160313	80	25	160318	9	37	160325	21	36	160303	33	22	160309	21	23	160312	66	18	160309	128	15	160307	266
N2:160483	chr02	160410	160556	+3:YBL032W;	5.35684	6	79.5	9.201	160493	294	20	160490	107	21	160493	79	29	160495	26	18	160494	59	23	160494	50	20	160493	64	20	160493	9	23	160487	9	12	160499	17	10	160499	5	23	160489	37	20	160493	120	18	160493	154
N2:160650	chr02	160577	160723	+4:YBL032W;	3.6045	5	81.33	16.658	160643	340	25	160651	106	25				160649	29	29	160652	98	33	160649	62	25	160647	58	24	160656	4	26	160665	10	24				160653	10	8	160650	29	27	160657	79	21	160651	109
N2:160949	chr02	160876	161022	+6:YBL032W;	4.77258	5	89	5.874	160968	520	25	160970	223	24	160956	80	29	160963	54	27	160958	81	27	160963	69	28	160962	71	28	160970	5	27	160948	10	13	160948	10	26	160967	5	12				160970	107	20	160964	63
N2:161113	chr02	161040	161186	+7:YBL032W;	3.91541	4	50.5	4.082	161118	303	25	161119	88	25	161118	33	21	161119	57	31	161121	60	19	161123	51	24	161121	40	28				161100	6	5				161132	4	35	161115	5	27	161128	45	14	161117	28
[truncated: 59,128 more rows]
[truncated: 49 more columns]

## Sheet: Hypothetical nucleosomes
All hypothetical nucleosome positions in Saccharomyces cerevisiae
# column descriptions:
# 1. name: N{chromosome:dyad coordinate} for measured nucleosomes, P{chromosome:dyad coordinate} for hypothetical/potential nucleosomes
# 2. chrom: chromosome
# 3. start: nucleosome start coordinate
# 4. end: nucleosome end coordinate
# 5. position relative to the TSS. '0' nucleosomes are in 5' NFR, Terminal nucleosomes are indicated with an *. Nucleosomes that are not within numbering range of a gene are left blank
# 6. peakheight: nucleosome peakheight; -1 is artifical for potential nucleosomes (only internal purpose)
# 7. nc: the number of nucleosomes from the six datasets that contibute to the reference nucleosome
# 8. occ: average occupancy level of datasets 1-4 (missing data excluded, since coverage of most sets is not saturating); -4 is artifical for potential nucleosomes (only internal purpose); -2, -1 are also artificial for nucleosomes only contributed by tiling array dataset 5 and/or 6 (only internal purpose)
# 9. fuzziness: standard deviation of nucleosome positions from datasets 1-6 ; -1 is artifical for potential nucleosomes (only internal purpose)
# 10-99. In sets of three, color coded: predicted nucleosomes/modified nucleosomes midpoint coordinate, number of Nucleosome Tag present within exclusion zone, standard deviation of tag coordinates
									H3																		H3K9ac																		H3K4me3
			Reference (Jiang and Pugh, 2009)							YPD			0			2			5			7			24			YPD			0			2			5			7			24			YPD			0
1	2	3	4	5	6	7	8	9	10	11	12	13	14	15	16	17	18	19	20	21	22	23	24	25	26	27	28	29	30	31	32	33	34	35	36	37	38	39	40	41	42	43	44	45	46	47	48	49	50
Name	chrom	start	end	position	peakheight	nc	occ	fuzziness	Midpoint	Nucleosome Tag	Fuzziness	Midpoint	Nucleosome Tag	Fuzziness	Midpoint	Nucleosome Tag	Fuzziness	Midpoint	Nucleosome Tag	Fuzziness	Midpoint	Nucleosome Tag	Fuzziness	Midpoint	Nucleosome Tag	Fuzziness	Midpoint	Tag	Fuzziness	Midpoint	Nucleosome Tag	Fuzziness	Midpoint	Nucleosome Tag	Fuzziness	Midpoint	Nucleosome Tag	Fuzziness	Midpoint	Nucleosome Tag	Fuzziness	Midpoint	Nucleosome Tag	Fuzziness	Midpoint	Tag	Fuzziness	Midpoint	Nucleosome Tag
P1:1744	chr01	1671	1817	+4:YAL068C;	-1	0	-4	-1										1813	1	0
P1:4830	chr01	4757	4903		-1	0	-4	-1	4824	515	37				4874	96	32	4878	96	37				4880	85	32	4832	82	29	4881	4	27	4879	3	29	4849	7	38							4842	6	29	4891	4
P1:6453	chr01	6380	6526	-1:SUT432;	-1	0	-4	-1	6449	83	30				6456	19	32	6442	19	31	6435	39	24	6452	8	22				6442	18	25	6444	8	14	6460	4	1	6451	9	23	6453	4	20				6452	20
P1:7461	chr01	7388	7534	+11:YAL067C;	-1	0	-4	-1	7484	456	40																									7504	20	30
P1:10613	chr01	10540	10686	-1:Unit005;	-1	0	-4	-1				10558	80	32	10557	55	34	10565	29	22				10571	29	32	10567	29	29	10554	32	29	10569	9	17	10558	12	11	10563	14	23	10562	49	30				10550	24
P1:12264	chr01	12191	12337	+2:YAL064W-B; -1:YAL065C;	-1	0	-4	-1							12211	3	9													12212	1	0
P1:12612	chr01	12539	12685	+4*:YAL064W-B;	-1	0	-4	-1				12579	35	40	12635	5	11																			12587	7	35										12582	2
P1:13091	chr01	13018	13164		-1	0	-4	-1							13085	1	0
P1:14661	chr01	14588	14734		-1	0	-4	-1																						14645	1	0
P1:18726	chr01	18653	18799		-1	0	-4	-1
P1:20466	chr01	20393	20539		-1	0	-4	-1																																					20502	1	0
P1:25249	chr01	25176	25322	+19:YAL063C;	-1	0	-4	-1							25214	5	36																												25190	1	0	25192	1
P1:36016	chr01	35943	36089	+7:YAL060W; +3:CUT439;	-1	0	-4	-1										35994	58	24	36017	91	25	36021	87	25				36045	28	24				36020	21	17
P1:36916	chr01	36843	36989	+3:YAL059W;	-1	0	-4	-1	36901	352	28				36898	61	31	36901	36	34	36893	55	35	36902	52	36	36902	126	32				36885	5	11				36919	6	16	36906	26	26	36902	146	27	36901	136
P1:40979	chr01	40906	41052	+12:YAL056W;	-1	0	-4	-1	40941	534	34	40942	123	33	40946	79	32	40948	54	26	40950	73	30	40949	75	29	40943	74	31	40940	4	28	40966	4	39				41047	7	34	40918	26	42
P1:41292	chr01	41219	41365	+14:YAL056W;	-1	0	-4	-1																						41225	8	26				41302	1	0
P1:42739	chr01	42666	42812	+14*:YAL054C; +4:YAL055W;	-1	0	-4	-1	42709	208	27				42729	31	34	42756	9	35	42729	24	31	42727	26	40	42707	132	24	42730	8	30				42679	9	38										42718	14
P1:43970	chr01	43897	44043	+7:YAL054C; +4:SUT002;	-1	0	-4	-1	43992	522	28	44003	93	34	43991	69	35	43999	43	30	43991	76	37	43998	85	32	43987	200	33				43941	7	32	43955	3	17	43971	8	33	43902	7	38	43994	118	24	43996	68
P1:47919	chr01	47846	47992	+14:YAL053W;	-1	0	-4	-1	47928	240	35	47864	91	44	47925	60	40										47928	27	38	47926	2	4	47882	1	0	47882	14	31							47906	1	0	47946	2
P1:50210	chr01	50137	50283	+11:YAL051W;	-1	0	-4	-1	50234	417	34				50237	79	35																50209	3	14				50142	6	31				50241	9	29	50234	6
P1:52737	chr01	52664	52810	+13*:YAL048C; 0:YAL049C;	-1	0	-4	-1
P1:61178	chr01	61105	61251	0:YAL042W; 0:YAL043C;	-1	0	-4	-1																61173	1	0
P1:63785	chr01	63712	63858	+7:YAL041W;	-1	0	-4	-1				63848	61	28	63783	37	23													63799	4	22																63796	10
P1:67168	chr01	67095	67241	+5:YAL040C;	-1	0	-4	-1	67203	330	35				67222	79	34				67213	78	33	67175	69	38				67158	18	37	67163	12	42	67168	22	28	67159	8	27	67108	74	32				67210	111
P1:71098	chr01	71025	71171		-1	0	-4	-1				71048	10	6							71047	2	8	71056	1	0				71108	1	0
P1:76305	chr01	76232	76378	0:YAL035W; 0:YAL036C;	-1	0	-4	-1
P1:77733	chr01	77660	77806		-1	0	-4	-1	77731	328	25				77737	109	28	77737	67	31				77739	66	31				77681	6	43	77715	6	28				77735	5	25				77741	50	21
P1:82378	chr01	82305	82451		-1	0	-4	-1				82407	61	37																																		82401	93
P1:85739	chr01	85666	85812	+9:YAL031C;	-1	0	-4	-1	85737	317	26							85751	40	28				85760	53	32	85749	39	24	85725	14	49				85751	1	0	85728	4	25				85733	10	19
P1:95336	chr01	95263	95409	+5:YAL027W;	-1	0	-4	-1							95355	48	43	95350	38	35				95334	35	34	95302	59	38				95307	10	26							95299	15	41				95300	7
P1:97892	chr01	97819	97965	+12:YAL026C;	-1	0	-4	-1	97948	456	32	97912	131	38				97956	70	34	97948	97	38	97908	81	37	97956	33	31				97947	4	9	97879	5	48							97947	6	22	97948	5
P1:98262	chr01	98189	98335	+10:YAL026C;	-1	0	-4	-1	98272	613	28	98220	135	32	98273	90	29	98273	79	30	98270	73	30	98272	68	29	98275	61	27	98295	4	23	98193	7	34	98221	6	17	98272	4	30	98291	9	32	98272	15	26
P1:98595	chr01	98522	98668	+8:YAL026C;	-1	0	-4	-1	98590	309	36							98611	62	36													98618	17	22							98590	12	39	98536	13	43
P1:103337	chr01	103264	103410	+17:YAL024C;	-1	0	-4	-1	103312	396	37	103319	93	39	103393	70	35													103348	7	42				103315	8	47	103355	1	0	103354	5	46
P1:107202	chr01	107129	107275	+10:YAL023C;	-1	0	-4	-1				107238	188	31	107219	134	38	107204	69	38										107251	9	23	107142	8	38	107129	7	28	107203	9	40	107160	29	39
P1:107679	chr01	107606	107752	+7:YAL023C;	-1	0	-4	-1				107706	80	42										107702	47	41	107725	24	46							107618	6	31
P1:109921	chr01	109848	109994	+4:YAL022C;	-1	0	-4	-1	109910	563	25	109887	129	30	109913	111	25	109913	59	25	109908	62	30	109912	83	21	109912	80	30	109921	5	26	109905	6	14							109921	17	34	109911	87	17	109900	59
P1:111310	chr01	111237	111383	+14:YAL021C;	-1	0	-4	-1	111275	506	32	111265	97	35	111308	101	33	111342	80	32	111341	93	37	111272	100	36	111273	55	34	111240	12	32	111339	12	22	111343	13	29	111341	7	20	111309	28	40	111269	14	32	111342	3
P1:111613	chr01	111540	111686	+12:YAL021C;	-1	0	-4	-1	111627	507	30	111567	166	38				111545	77	35	111551	111	36	111562	88	38	111631	59	31	111558	16	37	111623	10	14	111558	4	18	111615	11	28	111609	25	24	111560	21	34	111557	12
P1:112716	chr01	112643	112789	+5:YAL021C;	-1	0	-4	-1	112712	448	21	112709	160	27	112715	127	19	112710	74	18	112710	119	21	112716	117	20	112714	137	21	112705	9	14	112717	31	20	112707	24	20	112714	13	21	112707	78	22	112714	180	17	112708	118
P1:117930	chr01	117857	118003	+20:YAL019W;	-1	0	-4	-1																									117862	6	37				117887	1	0							117905	2
P1:121324	chr01	121251	121397	+10:YAL017W;	-1	0	-4	-1	121352	354	34				121329	52	34	121325	51	40										121378	7	32	121366	1	0							121257	1	0
P1:122297	chr01	122224	122370	+16:YAL017W;	-1	0	-4	-1	122315	555	34																			122347	1	0				122292	4	19	122307	4	7	122233	9	39
P1:125648	chr01	125575	125721	+6:YAL016W;	-1	0	-4	-1																									125657	4	12	125637	2	3										125702	14
P1:128214	chr01	128141	128287	+6:YAL014C; 0:YAL015C;	-1	0	-4	-1	128229	94	32							128228	12	26	128228	23	21				128230	69	31	128286	12	34	128258	9	26	128212	8	19	128218	5	7	128251	27	26	128230	19	35	128228	40
P1:128693	chr01	128620	128766	+3:YAL014C;	-1	0	-4	-1							128699	87	27	128687	55	27	128700	80	19	128700	79	23							128687	26	23	128685	19	25				128693	105	26	128690	261	22	128687	187
P1:133887	chr01	133814	133960	+11:YAL011W;	-1	0	-4	-1	133870	572	33				133871	81	30	133874	61	33	133865	89	32	133868	92	28							133866	11	22										133875	17	27	133870	8
P1:135003	chr01	134930	135076	+5:YAL010C;	-1	0	-4	-1	134981	706	28	134987	186	25	134984	77	26	134984	81	28	134990	80	30	135000	64	26	134982	146	24				134988	14	31				135001	10	21	135015	28	33	134980	68	23	134990	27
P1:137713	chr01	137640	137786		-1	0	-4	-1	137746	273	26	137749	97	29				137754	42	31	137719	53	31				137740	41	31	137749	6	38				137773	5	32	137693	4	34
P1:140531	chr01	140458	140604	+7:YAL005C;	-1	0	-4	-1	140519	14	15	140518	4	1				140520	11	4	140519	3	0	140521	7	6	140520	6	6										140517	1	0	140513	15	28	140517	2	0	140518	4
P1:142033	chr01	141960	142106	0:YAL003W;	-1	0	-4	-1				141972	3	2				141988	2	13							141964	6	29				141992	1	0				142104	16	27	141999	2	36
P1:143135	chr01	143062	143208	+1:anti005;	-1	0	-4	-1	143087	230	36	143144	91	36	143083	79	41	143140	51	35	143150	40	34	143143	51	33	143153	17	44	143185	2	0	143091	8	23	143153	2	29	143143	3	7	143081	16	47				143145	75
P1:143615	chr01	143542	143688	+1:YAL002W;	-1	0	-4	-1	143670	175	35							143656	31	37	143634	25	24	143599	17	28	143674	111	34	143641	24	25	143682	12	31	143667	9	26	143638	4	4				143673	59	24	143664	125
P1:144916	chr01	144843	144989	+9:YAL002W;	-1	0	-4	-1	144915	334	35										144921	54	32							144846	20	30	144879	4	33
P1:148869	chr01	148796	148942	+14:YAL001C;	-1	0	-4	-1	148877	500	29							148869	77	31																			148813	1	0	148899	19	29				148921	12
P1:150343	chr01	150270	150416	+5:YAL001C;	-1	0	-4	-1	150319	430	32	150414	58	34	150311	56	36	150306	91	37	150284	90	31	150322	51	35				150301	10	29	150310	5	26							150319	12	35	150322	19	28	150303	19
P1:150824	chr01	150751	150897	+2:YAL001C;	-1	0	-4	-1	150821	546	23	150823	138	29	150821	103	27	150822	92	27	150819	77	30	150819	69	28	150823	98	26	150814	17	29	150785	8	23	150762	7	23	150785	7	22	150817	26	29	150821	205	19	150822	189
P1:151691	chr01	151618	151764	+3*:CUT441;	-1	0	-4	-1	151719	94	28	151699	32	27	151728	25	44	151732	13	37	151756	20	37	151712	13	30	151726	38	23				151734	4	12	151729	3	26	151696	3	28							151711	13
P1:159561	chr01	159488	159634	+5:YAR008W;	-1	0	-4	-1																159546	65	24	159516	64	40							159570	2	31	159543	8	6	159547	34	20	159534	27	25
P1:159875	chr01	159802	159948		-1	0	-4	-1	159842	184	36				159855	25	33	159869	34	38	159856	25	28	159857	17	31							159842	2	8	159804	6	17				159855	7	24	159852	2	15
P1:165879	chr01	165806	165952		-1	0	-4	-1
P1:169121	chr01	169048	169194	-1:YAR015W; 0:YAR014C;	-1	0	-4	-1	169162	14	35	169158	10	34							169125	1	0	169136	3	11	169155	4	20																			169167	4
P1:169756	chr01	169683	169829	+4:YAR015W;	-1	0	-4	-1										169748	39	32	169736	45	30	169762	49	31							169753	11	13							169759	19	23				169749	43
P1:187742	chr01	187669	187815	+6:YAR031W; -1:YAR033W;	-1	0	-4	-1	187702	65	20																						187708	5	6	187696	2	28	187753	3	28
P1:192465	chr01	192392	192538	+15*:YAR035W; 0:YAR042W; -1:SUT436; +1:YAR035C-A;	-1	0	-4	-1				192416	49	30	192457	1	0	192402	5	28	192532	7	32	192528	8	37	192419	8	31	192420	5	28				192506	5	19	192432	1	0				192509	4	9
P1:193432	chr01	193359	193505	+6:YAR042W;	-1	0	-4	-1							193431	96	27	193435	42	28	193426	100	25				193436	57	27	193442	6	21				193446	11	25	193450	4	35	193437	25	27				193456	17
P1:193742	chr01	193669	193815	+8:YAR042W;	-1	0	-4	-1																																		193750	26	26
P1:194666	chr01	194593	194739	+14:YAR042W;	-1	0	-4	-1				194654	98	44	194720	88	41													194713	10	39	194667	3	33	194716	8	24				194704	14	38	194736	9	23
P1:201146	chr01	201073	201219		-1	0	-4	-1
P1:205427	chr01	205354	205500	+13:YAR050W;	-1	0	-4	-1
P1:206143	chr01	206070	206216	+17:YAR050W;	-1	0	-4	-1
P1:208628	chr01	208555	208701		-1	0	-4	-1
P1:209091	chr01	209018	209164		-1	0	-4	-1
P1:209606	chr01	209533	209679		-1	0	-4	-1
P1:209949	chr01	209876	210022		-1	0	-4	-1
P1:214563	chr01	214490	214636		-1	0	-4	-1
P1:218929	chr01	218856	219002		-1	0	-4	-1
P1:220991	chr01	220918	221064	+1:YAR066W;	-1	0	-4	-1
P1:221648	chr01	221575	221721	+5:YAR066W;	-1	0	-4	-1
P1:222662	chr01	222589	222735	+3:YAR068W;	-1	0	-4	-1	222642	55	4							222643	5	0	222643	1	0				222642	17	3																222641	11	6
P1:223495	chr01	223422	223568		-1	0	-4	-1
P1:224585	chr01	224512	224658		-1	0	-4	-1
P1:228857	chr01	228784	228930		-1	0	-4	-1	228889	2	2				228880	1	0				228890	3	25				228890	1	0																			228889	1
P2:73	chr02	0	146	+18*:YBL113C;	-1	0	-4	-1
P2:745	chr02	672	818	+14:YBL113C;	-1	0	-4	-1
P2:5064	chr02	4991	5137	+1:YBL111C;	-1	0	-4	-1
P2:7545	chr02	7472	7618	+2:YBL108C-A;	-1	0	-4	-1
P2:8036	chr02	7963	8109	-1:YBL108C-A;	-1	0	-4	-1
P2:11799	chr02	11726	11872	+14:YBL106C;	-1	0	-4	-1	11750	460	32							11755	80	41	11779	115	35	11749	95	31				11753	32	21	11751	15	30	11738	4	27				11753	16	38	11771	55	39
P2:12114	chr02	12041	12187	+12:YBL106C;	-1	0	-4	-1	12176	612	44	12093	131	34	12079	71	35	12089	85	31	12103	78	33	12129	87	40	12081	79	34	12094	10	23	12070	11	28				12107	10	37	12134	14	36	12138	10	40	12080	14
P2:14027	chr02	13954	14100	+1:YBL106C;	-1	0	-4	-1	14034	450	34	14036	129	29	14033	80	38	14037	85	35	14037	71	37	14032	64	32	14040	68	38	13986	10	45	14028	10	19				14025	7	20				14044	5	27	14093	2
P2:16349	chr02	16276	16422	+10:YBL105C;	-1	0	-4	-1				16335	134	31				16336	103	29																16348	2	0	16338	5	43							16335	6
P2:16723	chr02	16650	16796	+8:YBL105C;	-1	0	-4	-1	16759	726	32	16702	142	31	16785	106	34	16784	117	28	16733	122	33	16786	80	34	16743	53	39	16671	11	20	16795	17	31				16755	7	36				16770	35	25	16708	12
P2:17414	chr02	17341	17487	+4:YBL105C;	-1	0	-4	-1	17412	270	32	17378	86	26	17420	61	35	17414	33	33	17395	45	27																			17418	9	37	17408	84	27	17389	64
P2:23971	chr02	23898	24044	0:YBL102W; -1:YBL103C;	-1	0	-4	-1	23937	10	20	24042	88	25	23954	3	30	24039	52	18	24042	52	19	24040	49	20	24043	371	17	24037	84	19	24042	46	11	24039	29	18				23945	9	31	23948	9	46	24041	299
P2:28956	chr02	28883	29029		-1	0	-4	-1				28936	21	40	28963	3	16	28947	3	34				28954	6	27				28900	24	34				28895	10	26	28891	21	29	28961	5	31				28939	4
P2:29779	chr02	29706	29852		-1	0	-4	-1
P2:31262	chr02	31189	31335		-1	0	-4	-1
P2:31741	chr02	31668	31814		-1	0	-4	-1
P2:33766	chr02	33693	33839		-1	0	-4	-1				33698	1	0
P2:35337	chr02	35264	35410		-1	0	-4	-1
P2:38776	chr02	38703	38849	+13:YBL099W;	-1	0	-4	-1							38827	4	27							38720	17	37	38818	1	0				38821	2	3										38819	2	15
P2:46468	chr02	46395	46541	+5*:YBL091C-A;	-1	0	-4	-1	46450	29	52							46464	11	29				46482	7	30																			46467	9	47
P2:50758	chr02	50685	50831	+8:YBL089W; +52:YBL088C;	-1	0	-4	-1	50772	505	27	50763	169	25	50763	70	30	50755	75	27	50758	109	30	50768	55	30	50769	64	28	50759	14	25	50771	3	15	50753	9	11	50752	10	24				50768	16	15	50770	8
P2:53057	chr02	52984	53130	+39:YBL088C;	-1	0	-4	-1							53091	91	46				53091	116	40				53090	80	33	53035	6	34	53001	7	20				53085	9	34	52992	17	35				52984	10
P2:55378	chr02	55305	55451	+27:YBL088C;	-1	0	-4	-1				55368	68	44																						55375	3	0
P2:55730	chr02	55657	55803	+25:YBL088C;	-1	0	-4	-1	55727	444	47							55740	71	36	55801	95	33	55798	92	39	55723	19	42	55800	3	5	55716	5	25	55717	3	49				55691	6	47				55776	2
P2:56330	chr02	56257	56403	+21:YBL088C;	-1	0	-4	-1				56266	142	40	56264	86	39										56272	59	35	56274	6	38										56285	13	48
P2:57763	chr02	57690	57836	+12:YBL088C;	-1	0	-4	-1				57792	121	32										57796	64	38							57751	7	22				57714	10	33
P2:60344	chr02	60271	60417		-1	0	-4	-1	60283	168	31	60280	79	31	60410	47	29							60397	34	30	60397	84	34	60406	8	25				60388	9	27	60380	6	30	60394	28	25	60400	103	33	60287	70
P2:61544	chr02	61471	61617	+8:YBL086C;	-1	0	-4	-1	61528	548	35				61531	90	38	61538	62	37	61514	96	34													61476	4	23	61527	4	18	61553	15	26	61537	31	37
P2:62310	chr02	62237	62383	+3:YBL086C;	-1	0	-4	-1	62289	425	24										62283	73	23	62281	88	20				62285	15	17				62270	13	18	62290	6	18	62277	19	28	62290	121	18
P2:64229	chr02	64156	64302	+4:YBL085W;	-1	0	-4	-1				64277	161	30	64263	103	36	64273	70	35				64269	84	33	64261	45	30	64272	10	13	64228	12	25				64250	1	0	64273	36	25	64261	75	25	64275	145
P2:64704	chr02	64631	64777	+7:YBL085W;	-1	0	-4	-1																																		64720	8	40
P2:68243	chr02	68170	68316	+9*:YBL084C;	-1	0	-4	-1																68170	43	31							68190	2	21													68183	7
P2:70463	chr02	70390	70536	+5:YBL082C;	-1	0	-4	-1							70441	80	43							70440	59	41				70442	9	38	70440	11	39	70442	11	29				70442	85	39				70440	31
P2:78506	chr02	78433	78579	+20:YBL079W;	-1	0	-4	-1				78458	136	36	78462	79	36	78546	62	37	78439	84	36	78538	55	41	78452	19	34	78452	3	39	78465	2	35	78446	3	13	78449	7	35	78446	9	31	78560	5	24
P2:78827	chr02	78754	78900	+22:YBL079W;	-1	0	-4	-1				78858	102	38				78855	53	30																78859	12	17				78831	9	42	78858	7	3	78856	3
P2:79146	chr02	79073	79219	+24:YBL079W;	-1	0	-4	-1	79147	354	36				79105	86	41	79156	75	26				79150	43	28				79208	2	9				79206	5	42	79198	4	43	79154	17	38	79132	11	39	79108	10
P2:88215	chr02	88142	88288		-1	0	-4	-1	88172	34	45							88175	4	27							88179	40	47	88178	6	38				88277	1	0	88287	3	29	88284	24	33	88280	10	36
P2:88928	chr02	88855	89001		-1	0	-4	-1	88950	31	23				88959	19	26	88961	8	29	88966	18	35				88935	6	19	88925	7	23	88958	2	6				88933	1	0							88956	27
P2:89821	chr02	89748	89894	0:YBL071W-A; -1:YBL071C-B;	-1	0	-4	-1							89835	1	0																						89801	2	0
P2:95129	chr02	95056	95202	+7:YBL067C;	-1	0	-4	-1	95116	249	38				95119	38	34	95113	43	38																									95109	7	22
P2:97063	chr02	96990	97136	+22:YBL066C;	-1	0	-4	-1							97046	64	44	97054	54	49										97119	21	32							97060	8	38	97051	40	37
P2:98054	chr02	97981	98127	+16:YBL066C;	-1	0	-4	-1	97998	524	39	97984	174	36				97984	92	46	97985	115	43	97987	90	44				98003	12	34				98011	7	29				98052	8	40				97984	9
P2:99315	chr02	99242	99388	+8:YBL066C;	-1	0	-4	-1	99296	483	26							99313	59	21							99287	74	28				99285	8	27	99295	9	10	99285	10	32				99292	68	24
P2:100708	chr02	100635	100781	-1:YBL066C; +4:YBL064C;	-1	0	-4	-1	100680	263	39	100675	56	38				100676	37	36	100684	41	32	100676	40	33				100690	55	29				100687	2	35	100672	4	9	100635	13	42				100677	108
P2:101009	chr02	100936	101082	+2:YBL064C;	-1	0	-4	-1																															100992	5	18	100985	34	38
P2:101493	chr02	101420	101566	-1:YBL064C;	-1	0	-4	-1	101520	229	27	101528	63	28	101541	34	43	101538	13	38	101552	44	30	101522	45	26	101524	19	31	101533	5	18	101533	48	21	101548	63	23	101554	31	21				101516	12	20	101516	21
P2:102736	chr02	102663	102809	+6:YBL063W;	-1	0	-4	-1							102714	77	39	102700	65	26	102713	97	35	102728	50	26				102768	1	0	102719	7	27				102758	6	23				102739	19	26
P2:104609	chr02	104536	104682	+18:YBL063W;	-1	0	-4	-1	104549	228	41	104548	80	45	104542	43	36	104548	45	34	104628	22	41	104619	22	33	104620	14	37							104619	1	0	104554	3	9	104629	2	1	104633	2	7	104561	1
P2:106816	chr02	106743	106889	+5:YBL061C;	-1	0	-4	-1	106822	366	32				106822	86	32	106820	67	31				106757	83	30				106756	15	30	106832	10	49	106826	7	31	106821	8	29				106816	55	27	106765	47
P2:109484	chr02	109411	109557	+10:YBL060W;	-1	0	-4	-1	109483	415	39	109482	114	36	109481	83	34	109482	45	34	109484	82	36	109482	51	38	109478	69	38	109488	27	39	109534	10	39	109484	11	28	109475	11	25	109486	56	26	109480	19	34	109477	12
P2:110877	chr02	110804	110950	-1:YBL059C-A; +2*:YBL059W;	-1	0	-4	-1																						110913	6	38				110896	14	23	110916	5	23	110921	51	38
P2:112089	chr02	112016	112162	+5:YBL058W;	-1	0	-4	-1	112091	421	24	112078	133	25	112070	87	35	112073	49	30																112108	6	20	112085	6	16	112125	24	39
P2:112561	chr02	112488	112634	+8:YBL058W;	-1	0	-4	-1	112583	543	30	112582	179	35	112582	84	36	112575	71	35	112579	81	32	112580	97	32	112581	127	33				112582	8	26							112573	35	33	112581	99	28	112579	57
P2:114184	chr02	114111	114257	+4:YBL056W;	-1	0	-4	-1	114202	365	27	114212	108	27				114190	36	24	114199	65	28	114183	41	33				114197	7	25	114230	5	24	114212	6	23	114213	6	12							114203	125
P2:114687	chr02	114614	114760	+7:YBL056W;	-1	0	-4	-1	114704	522	28	114706	161	31	114703	91	30	114702	93	34	114703	111	32				114707	35	28	114704	7	37							114709	4	1							114708	26
P2:117000	chr02	116927	117073	-1:YBL055C;	-1	0	-4	-1							116991	6	25							116984	4	21	116982	6	18				116982	1	0
P2:124937	chr02	124864	125010	0:YBL050W; 0:YBL051C;	-1	0	-4	-1													124937	1	0
P2:125734	chr02	125661	125807		-1	0	-4	-1	125735	503	24	125725	175	33	125734	79	24	125734	50	25	125744	70	31	125733	83	28	125730	83	28	125742	16	30	125750	13	28				125743	9	19	125736	17	31	125735	72	21	125733	103
P2:126206	chr02	126133	126279	+9*:SUT438;	-1	0	-4	-1																126252	21	25				126257	65	27										126254	86	33				126260	3
P2:126869	chr02	126796	126942	+5:SUT438; +1:YBL049W;	-1	0	-4	-1				126928	100	38	126932	34	36				126925	48	37	126918	46	36				126935	90	30	126922	29	34	126911	20	31	126904	18	36	126925	80	31
P2:128705	chr02	128632	128778	+20:YBL047C;	-1	0	-4	-1	128695	299	35	128685	103	35	128701	67	34							128689	72	34	128697	36	38	128679	14	13	128686	4	27				128699	4	29				128696	11	41
P2:135014	chr02	134941	135087	+5:YBL045C;	-1	0	-4	-1	135007	245	38				135000	47	39	135006	28	40				134956	59	38				135031	13	29										134948	20	37	135012	78	37	134954	77
P2:137570	chr02	137497	137643	+8*:YBL044W; +8*:YBL043W;	-1	0	-4	-1				137580	45	38							137609	19	28	137608	22	27				137526	6	26	137562	7	22							137510	11	37	137532	26	21
P2:138747	chr02	138674	138820	+10:YBL042C;	-1	0	-4	-1	138716	238	42				138705	63	41	138800	65	38	138714	61	40	138711	45	43	138808	80	34													138796	21	32	138804	73	33	138803	21
P2:141122	chr02	141049	141195	0:YBL041W;	-1	0	-4	-1
P2:143900	chr02	143827	143973	+13*:YBL039C;	-1	0	-4	-1	143839	50	28				143839	15	14	143912	8	30										143857	2	15
P2:145434	chr02	145361	145507	+3:YBL039C;	-1	0	-4	-1	145431	192	33	145431	77	32	145441	61	35				145439	71	36										145383	9	25	145442	3	0							145437	48	35	145431	38
P2:147504	chr02	147431	147577	+3:YBL037W;	-1	0	-4	-1				147533	104	22	147505	32	30										147500	56	34	147528	29	17	147508	4	33										147487	78	28
P2:147818	chr02	147745	147891	+5:YBL037W;	-1	0	-4	-1				147879	151	26	147862	36	43	147811	31	38	147831	39	35													147881	9	38	147811	2	0	147837	6	31	147812	24	28
P2:148430	chr02	148357	148503	+9:YBL037W;	-1	0	-4	-1	148448	521	38	148382	183	38	148422	105	34				148457	93	39							148412	8	31				148451	7	26							148444	8	14
P2:148731	chr02	148658	148804	+11:YBL037W;	-1	0	-4	-1	148800	580	31	148708	106	36	148793	78	33				148798	106	36				148695	28	42	148717	11	18	148713	3	13	148684	13	29				148729	6	37				148666	5
P2:149204	chr02	149131	149277	+14:YBL037W;	-1	0	-4	-1	149259	608	38	149255	145	36	149211	88	36	149218	73	31	149256	83	40	149204	65	31	149255	75	39				149199	7	34													149247	7
P2:152827	chr02	152754	152900	+6:YBL035C;	-1	0	-4	-1	152826	379	33	152820	90	34				152827	41	35	152824	53	35	152819	47	30	152824	76	32										152822	5	12				152820	24	34	152821	58
P2:153816	chr02	153743	153889	+31*:YBL034C; -1:YBL035C;	-1	0	-4	-1	153811	7	19	153819	3	8													153812	6	24													153808	4	23
P2:155055	chr02	154982	155128	+24:YBL034C;	-1	0	-4	-1	155078	329	36	155084	102	34							155083	76	32																			155095	5	15	155074	6	30	155119	1
P2:159190	chr02	159117	159263	+4:YBL033C;	-1	0	-4	-1				159164	105	30				159189	35	21	159180	43	28	159188	51	24				159240	3	37				159178	7	28	159180	10	17	159186	73	29	159183	110	27	159182	142
P2:160800	chr02	160727	160873	+5:YBL032W;	-1	0	-4	-1	160812	393	25	160812	115	26	160808	77	23	160806	39	26	160810	66	23	160811	57	26	160813	53	31	160813	10	24				160736	2	35				160813	30	18	160814	78	18	160812	45
P2:166398	chr02	166325	166471	+2:YBL029W; +4:SUT439;	-1	0	-4	-1	166437	54	34				166433	9	30	166431	7	36				166397	7	30	166426	12	29										166424	3	17
P2:167024	chr02	166951	167097	+6:YBL029W; 0:SUT439;	-1	0	-4	-1													167003	11	27
P2:172709	chr02	172636	172782	+2:YBL024W;	-1	0	-4	-1																									172772	5	36							172708	11	18				172714	87
P2:180168	chr02	180095	180241	+8:YBL022C;	-1	0	-4	-1	180239	498	29																180162	12	42										180220	2	26							180175	9
P2:181929	chr02	181856	182002	+2:YBL021C;	-1	0	-4	-1				181916	65	39	181920	49	31	181914	29	34	181899	31	28	181923	31	28				181887	13	27				181920	8	18	181929	14	24							181899	162
[truncated: 4,878 more rows]
[truncated: 49 more columns]

## Sheet: unmapped Nucleosomes
# 1-120. In sets of three, color coded: unmapped nucleosomes/modified nucleosomes(not within 73bp distance from reference nucleosome dyad) chromosome, midpoint coordinate, number of Nucleosome Tag present within exclusion zone, standard deviation of tag coordinates
[truncated: 5,537 more rows]
[truncated: 70 more columns]
